# Supplementary material for: A randomized multiplex CRISPRi-Seq approach for the identification of critical combinations of genes
Source: bioRxiv preprint, doi:10.1101/2023.02.03.527066, version 3 (2023-11-08)
Supplement: Supplementary File 1 [file 527066_file10.xlsx]

## Sheet: File 1a
File 1a: 10-plex Construct Descriptions and Spacer Sequences
10-plex (multiplex CRISPR)	Description	Target gene in spacer order
MC-1	Peptidases	lpg2461, lpg0969, lpg0275, lpg0056, lpg2433, lpg0126, lpg1110, lpg1120, lpg1683, lpg2586
MC-2	Predicted multipass transmembrane proteins	lpg0404, lpg0016, lpg0059, lpg0086, lpg0963, lpg0140, lpg0246, lpg2244, lpg2733, lpg1189
MC-3	GCPR and signaling proteins	lpg2456, lpg2435, lpg1527, lpg1099, lpg0364, lpg0879, lpg2591, lpg2222, lpg1149, lpg2874
MC-4	E3 ligases	lpg1975, lpg1976, lpg2224, lpg2525, lpg2830, lpg0171, lpg2144, lpg2510, lpg1317, lpg0035
MC-5	Similarity to Lpg1496	lpg1496, lpg2153, lpg2154, lpg2155, lpg2156, lpg2157, lpg0234, lpg0191, lpg2509, lpg2523
MC-6	E3 ligases	lpg1625, lpg1960, lpg0733, lpg2452, lpg2498, lpg2455, lpg2370, lpg2577, lpg2511, lpg1111
MC-7	Kinases	lpg0209, lpg2508, lpg1685, lpg1930, lpg2050, lpg2603, lpg1483, lpg2137, lpg2556, lpg0208
MC-8	Kinases	lpg2351, lpg1925, lpg1408, lpg1312, lpg1909, lpg1525, lpg0276, lpg1687, lpg1158, lpg2216
MC-9	Cell division (regulatory)	lpg0365, lpg1684, lpg0967, lpg1356, lpg2423, lpg2424, lpg0240, lpg1598, lpg1499, lpg2148
MC-10	Toxins and similarity to Lgt1	lpg1368, lpg2862, lpg1488, lpg1961, lpg1978, lpg0080, lpg2210, lpg2804, lpg1966, lpg2143
MC-11	Glycosyltransferases	lpg0422, lpg0774, lpg2504, lpg1670, lpg1752, lpg2311, lpg0518, lpg1290, lpg0436, lpg2999
MC-12	Phospholipases and similarity to VipD	lpg0670, lpg0952, lpg2410, lpg1227, lpg1426, lpg2837, lpg2831, lpg2422, lpg1354, lpg2813
MC-13	Vesicle trafficking and chaperones	lpg2300, lpg1129, lpg1689, lpg0621, lpg1663, lpg2128, lpg0921, lpg2344, lpg2793, lpg0902
MC-A	7 core effectors (conserved in all analyzed Legionella sp.)	lpg2815, lpg2300, lpg2832, lpg0107, lpg0140, lpg3000, lpg0103
MC-B	Conserved in 40-37 Legionella sp.	lpg0294, lpg1836, lpg0405, lpg1661, lpg2888, lpg0940, lpg0376, lpg0483, lpg1907, lpg0963
MC-C	Conserved in 37-33 Legionella sp.	lpg0130, lpg2745, lpg2879, lpg2975, lpg2311, lpg2322, lpg2607, lpg0733, lpg1426, lpg0365
MC-D	Conserved in 33-31 Legionella sp.	lpg0393, lpg2216, lpg0008, lpg0012, lpg0921, lpg1166, lpg1602, lpg1958, lpg2351, lpg2828
Groups A, B, C, and D are extracted from the publication: Burstein et. al Nature Genetics (2016)
10-plex	Position	Gene	Spacer sequence	Forward qPCR primer	Reverse qPCR primer
MC-1	1	lpg2461	TTTTGTTCAAAATTGTTTTCATCAAAAGCC
MC-1	2	lpg0969	ACTGGGAGGGACAACATCGATTTCCAATTC
MC-1	3	lpg0275	AAAAGAAACGACCCAACCAGGTAGCCTAAA
MC-1	4	lpg0056	CAGGTTGGCCCGCAAGATTCATCATCAGGT
MC-1	5	lpg2433	AGTAAGGGGAGTATTTTTTTCTGGAAACAA
MC-1	6	lpg0126	GATGGTAATAGGGCCTTGAGTTGGGAACAA
MC-1	7	lpg1110	TTAGTTCATTAATAACTAATGCAGAAGTGC
MC-1	8	lpg1120	AGTTACGAAACCGTCATTTTTGGGGAATAG
MC-1	9	lpg1683	CACCTTCAAGAAGATCAAATTCATCGATAT
MC-1	10	lpg2586	AGTGTTTTATTTTGCGGGGCTTTTAATGTT
MC-2	1	lpg0404	GCAAGTTACGGATACTGTCTACAGAGCCAA	TCAGTTGCTTTTGGGGAGCA	TCCAAACAGCACCCAAACCA
MC-2	2	lpg0016	CATTAATACGATGTTCTTTATACCTATCGT	GGTGTGGAGGCAGATAGCAA	AGAAAGGCACGCTCCCAAAT
MC-2	3	lpg0059	AAGTAGACAAAGGCTGAATTATTGTTCTGT	TTCGGACGTGCGTAAGGAAA	GCCGCGTGTTGAGAAGTTTT
MC-2	4	lpg0086	CTTGGAAGCCTGATTTTCATCACTCGCATG	ACCAGACCATGCAAACTCGT	GCGGTGACAATACAGCCAGA
MC-2	5	lpg0963	TAAAAAGTTAAGGCTGGTTAGAGCTCCTGC	TTACCGAGCAGGAGTGGAGT	GCGGCTCCGAATAAAGGTTG
MC-2	6	lpg0140	TGGAAATATTTTTAATAAATGACTAATAAT	TATCGTTGACGCAGGCCATT	GCAGCACGACAAAATCACGA
MC-2	7	lpg0246	CGATCCCCGTCGTACTCGTTCCAACGCATA	ATGCTCTGTATGGGTGAGGC	ACCAGGCATTTAACCGTTGC
MC-2	8	lpg2244	GTTATCATTTGGCTTTCAAGTCGCTTCTTA	AATTTTGTAGCCGCCGAGGT	CATTCTCTGGCGCCCCTAAA
MC-2	9	lpg2733	CAGTTTCGTTTTAACTCATCCACTGGGGGT	GCAGCGGGATGCATTGTTTT	CAACCATCCCCATCCTGTGG
MC-2	10	lpg1189	CTCACTGAAGATGAAAATAGAAAAATGGTT	CCGCCAACCCAATACTCACT	ATGGTTCTCATGGACTCCGC
MC-3	1	lpg2456	ATCGGTGGTTGAAATTTTTGAGTCAGGCGG
MC-3	2	lpg2435	CAGCTTCATCTGCATGAAGTTCATTAATAT
MC-3	3	lpg1527	CTAAAGAAAAATAGACCCAGGGAAGTTACA
MC-3	4	lpg1099	AACATTATAATGTAATTCCCAGATTAAAAA
MC-3	5	lpg0364	TTATTGTCTAAGCTGGCATTTATTTCGCCA
MC-3	6	lpg0879	GCAAGGTCATACTTTCCTTGTAATGCTTGG
MC-3	7	lpg2591	CAGCAAATTCGCTACTTGGATCTAATTGCG
MC-3	8	lpg2222	TAAATGCTTTTTCGTAATACCCCTTGTTAT
MC-3	9	lpg1149	TGAGTAAGATTGCCATGCCTCATTAAACCA
MC-3	10	lpg2874	CAATGGTTTCTGACTTCCATTTCAAATTGG
MC-4	1	lpg1975	GAGAACATCAGGCATGTTTATTTTTATAAA	ACCAGAAACTGGAGTGCAGC	ATCTCGACCAACAACCACAGT
MC-4	2	lpg1976	ATGTATTTGTTTTACTGTTTTCATAGTGTA	GGCCGCAAATCGCTACTTTT	TTGGATGGCATGGAACGTCA
MC-4	3	lpg2224	TTCTGGATTGGGTTGGCGATTAAGTTCACG	ACTGACCATCGTTCCCACAC	GGTTTTTGCTCTCTGCTGCC
MC-4	4	lpg2525	ATCCGCAAAAATTTCTAAAAGAAGTTCATT	TGCATGTAGGAATGAGCCAGG	ACTGTTGTTCGCCATCAGGA
MC-4	5	lpg2830	TAAGTATTTACTTTTATGATCAATATCAAA	GGCGACACGAAATCCTTTTGA	TCCGCTGTCAATAGGGCAAG
MC-4	6	lpg0171	CAGGAGGTAACTTTTGGAGTCCAGGCTTTG	ATACGACCCCACAAAGCCTG	TGGTATATTCTGGCCGGTCT
MC-4	7	lpg2144	GAAACTCAATGTATTGACAATTGTTTCCTC	TGGCGGCAAGAAGCAATAAC	CGATAGCTGCAAGTAAAGGCG
MC-4	8	lpg2510	CTTAGCGATATGTAAATATTCGCATCGCTC	CCCCGGATAGACCAGACTCA	TCAGTTGCCCGTTGGTATCC
MC-4	9	lpg1317	AATATTATTAATTTCTTCTCTATTAATAAT	TGAGCAATTTGTTCGAGCAGG	TCACAAGCATATTCGCCAGT
MC-4	10	lpg0035	GCTAAGTCGTATCGTTTTTTGAGCATAAGT	GTACAGAGCAGCACGAAGGT	CCCTGATTCTGCACTAACCGA
MC-5	1	lpg1496	TTCCTCACTAACAAATTCAATTTTTAAATT
MC-5	2	lpg2153	TTGTCTGTTCAGGGCCTCTGTGTCAATAGT
MC-5	3	lpg2154	CAGCACATCGATGAGGGTGTGGCTGTCTTT
MC-5	4	lpg2155	AACATCGGTTGTTTCCACCGCAGTCTCAGA
MC-5	5	lpg2156	CTCCGTTATAAATAGTACCGCTTTTAATCT
MC-5	6	lpg2157	TAGTTGGCACTCCGTTGTATATGCTACCGC
MC-5	7	lpg0234	TCCGTTGTAGATAGTACCGCTGGTAATATT
MC-5	8	lpg0191	TACTTGTTGAGTAAAGCAAGTGCTTCTTTT
MC-5	9	lpg2509	CCATCAATTGTAATATACCTTTGCAAGTTA
MC-5	10	lpg2523	CTTGTTTAAAAAGGATTGATTTGTTTAGTT
MC-6	1	lpg1625	GGCAATACTCTCATCCAATTTGTTTTTATA	GCACTGCTTCAACGCCTTAT	ACCATACCCGCTGGTGTTAC
MC-6	2	lpg1960	TAATAATTCACCTTGAAGAGCTCTTTTTAT	AGGCTGGCTTTAGAGAGGGA	GCTCACCATGGGATGATGCT
MC-6	3	lpg0733	TATATCCAATAACTCTTTTCCATCCTTTGG	TGGAACCCGGGGAAGAGTTA	TCTCGGGCTTTTACACACTCC
MC-6	4	lpg2452	CGGTAAAGGGTTTTACAGAGTGACGACCTC	GACGAACCGCACTTGATTGG	AATGGTCTTCCATGCGCTGA
MC-6	5	lpg2498	CAAAAGAATCCAGGTGTTCCTCATAATCAT	ACTCCAGTTTTATGCGGCGA	TGCCCATTTGCCATGCTTTG
MC-6	6	lpg2455	AACGCTGTCCTTATAATAGAGCATTTTATC	TGGAACTTCCTAAAGAGCCAGT	GTCCAACGGGGTCGGATTTA
MC-6	7	lpg2370	TCCTGGTCACTAATCTTTTCATAAGTAATA	TCGTACAAGAGTTCCATCAGGT	GCATCGTTGCTCTAGCAATTC
MC-6	8	lpg2577	AGGTAATCCTAATGAACGACAGATACTGCA	AGCAGAATGCTCTGGATGAGT	CCCTCTCTGGCAAGCGTAAT
MC-6	9	lpg2511	TTCATCAACATATAGATAATCACAACGTTC	GTCTGGGTAGCTCAGGCATC	TCGGCCAACAGGTACTGAAC
MC-6	10	lpg1111	ATCTTCTTGCATAATAGGATCAAAATAAGT	TGGGCACGAGAGGTACTACA	TCCTGTTGTTGAGCAGGGTT
MC-7	1	lpg0209	CTGCCTTGGCGTTTTGTATTTTTTAGAAAA
MC-7	2	lpg2508	GAGGTGCTTAACTGACTAGTATCTGACTTT
MC-7	3	lpg1685	TTCTCTCATCAAAATCTTGGCTCCCTAAAG
MC-7	4	lpg1930	CGAAGTCATAGCGTTCAATTCCTGCTGCTC
MC-7	5	lpg2050	CCGCGTTTGCAGAGAAATGGTATTCAAGTT
MC-7	6	lpg2603	GTCTGTTCCATTAACAATTTTATTTATTTT
MC-7	7	lpg1483	GGAGATTAGCTGCATCAACGGAAAAAAACA
MC-7	8	lpg2137	CTGCGTTAAAATTTCTTTATCTTGATGTAA
MC-7	9	lpg2556	TCGGGGTCCGCCGATAATTTTTCCAGTGTC
MC-7	10	lpg0208	CTCTCGCATGCCAAATAGCTGCTCCCAAGA
MC-8	1	lpg2351	TGATTGTAATGATTTTAGCAATACAGAAAA	GCCACCGAGAACTACAATCCA	GTGGTGCAATTTAGCCAGAGC
MC-8	2	lpg1925	TTTAAATAACGTTTTAAAATCCTTATCTTT	CGGTCATCCCGCCTTGTTTA	TGGGTATAACTTTGCCCGCT
MC-8	3	lpg1408	GTATGTAAATGATTAAATGTTCGCTTAATT	TGGGTTATGCGGATTCCTGG	ACCTGCAACCCATCTTCAGG
MC-8	4	lpg1312	TACATACTCATCAGACTCTGTATTTTGTTC	AGGGGGAAATGCTACACGAG	TGCCGAACCAGGGTTTCTAC
MC-8	5	lpg1909	AAGACACCTTTTAATACCCTTGGTTTGATT	TGGTTCCCATTGGAAGGAGC	TCGATGAGGGGACAGATGTT
MC-8	6	lpg1525	TTGTCATTATCTTTTTTAGAAGCATCATTT	AATCGATGGTGTTGCCGAAA	AGCCTTTACCGACGCAGAAC
MC-8	7	lpg0276	CTCGCGATATGCATGGCTATCTAAAATTTT	TGAGTTCCGAGAGTCGCTTG	AGAAGTGACGGTAATGCGGG
MC-8	8	lpg1687	ATTTAGTATCAATCAATAGTGCGTAATCTG	CATGCCATTGGAGCTTTGGA	CTCCTGGAGTGGCTTCTGTT
MC-8	9	lpg1158	TCATCAAAGGAGATACAATAACTCTCCCCT	TACTCCCTGAAGAGGCACGA	GCAGCATGCTCGGCATAAAA
MC-8	10	lpg2216	ATATATGCCTGTTCTGATTTCGCCTTTTCT	TTGGCGTCCGATTTGGGATT	GCGCACTCTGGGTGTTTTAC
MC-9	1	lpg0365	TGATGCTGGCTAAATAATCCTTATTTAAGA
MC-9	2	lpg1684	TTTGCTCTGAACTGTCTTTTTCACTTGTTT
MC-9	3	lpg0967	ATCTGCTCCACTCATATACCTATATTTAAA
MC-9	4	lpg1356	CAAAACCAACTAACTCATCGGCCAAAACAA
MC-9	5	lpg2423	TTATCTCCTCCTGACAGGACTAAAACTTGC
MC-9	6	lpg2424	GATGAATATAAGGCTTTTGCAATTCATCCA
MC-9	7	lpg0240	AAAAAACTCGCCATCTTTTCTACTTGCTTC
MC-9	8	lpg1598	TATAAATAGCCTGGCTTTTTCTTTGTTTGA
MC-9	9	lpg1499	TGTCAATTGATGGATCCATTTTTTTCATCC
MC-9	10	lpg2148	GCTTTTCAACTTTTTGTGTACCATGAAACC
MC-10	1	lpg1368	TTCATCAGGGGTCAGCCCTTTGATGACACC
MC-10	2	lpg2862	TCAACTTACGTTTTAAAACGGTTATAAGTC
MC-10	3	lpg1488	AGTGTTTGTTCATTAACTCCAGTGTTTAAC
MC-10	4	lpg1961	CAAACAAAATGTATTTTGGATGGTAGCGTA
MC-10	5	lpg1978	TTTGTCAATTTGAGCCTCTTGACCAGCCTG
MC-10	6	lpg0080	ATTCAAATTTAAGTAACGCATTGTGAAATT
MC-10	7	lpg2210	AGCAGTATCATTAGCTAATAAAACCTCATT
MC-10	8	lpg2804	GAACCTGAGAACCTTAACCCGGTAATGATT
MC-10	9	lpg1966	CCACTACGTTTTCCTCAACGAGGCTGGCTA
MC-10	10	lpg2143	ACAGGATTTAATAGCATTAAGCGTCAAATC
MC-11	1	lpg0422	TCTCCTGATAGTAGTTAGTTTTAAAAAAGA
MC-11	2	lpg0774	AATAATGCTGCAAGAGCATGAATTAATTGA
MC-11	3	lpg2504	CCCATCACCTGTTTTTGCTTCTTCATCAAA
MC-11	4	lpg1670	CGCTATATGACGATTTCAGCCAATCATTAT
MC-11	5	lpg1752	CATTTTGCTGAAATTCGGCAAACTCTAGCA
MC-11	6	lpg2311	GCATCAAAAAATTCTTTATTTTTGGCCATA
MC-11	7	lpg0518	TTATGAATGAGCGATTCAATTTCTGTTCTA
MC-11	8	lpg1290	AATGACAGCCGCTAATGCATTTAGGATTTG
MC-11	9	lpg0436	AGTGGGGGGGGCGTACTGATTTACAAGCTC
MC-11	10	lpg2999	AGGAGAAACATAATGAGGAATAAAACAAAC
MC-12	1	lpg0670	CACCTCCTTGTAAAGCAAGATTAATCATTT
MC-12	2	lpg0952	TATTTTTTTCAAGACCAAAATCCTTGAAAA
MC-12	3	lpg2410	AGAGATGAACCATGGTTCTTTTGTCTGTAG
MC-12	4	lpg1227	TGCAGTACTCAATTTTCCTAGATTTACAGA
MC-12	5	lpg1426	AGATTCCAGCAGTTGACTTATGACGTGCTG
MC-12	6	lpg2837	ATGAAGAGCCAGCGACAAATCCTGTTGTTT
MC-12	7	lpg2831	GATATTTCCAGTAAATTCCTTTTTAATTTA
MC-12	8	lpg2422	AGGACCATCAAACATTCTCATTGCCACTGT
MC-12	9	lpg1354	AAGAGTGGAGTCTCCTAATAAAATTAATTT
MC-12	10	lpg2813	GGTATTAATCAGGCGTTGGGTTTGAGTTAA
MC-13	1	lpg2300	TTCCCCTGCACGCAGATAAGCATCAAAATC	TGTGACGTCTGGCTTGTTGA	TATCTGCGTGCAGGGGAATC
MC-13	2	lpg1129	AGGGGATTGTGAACTTAATACGATTCCAGT	AGATGGCAGCCTGGTTTTCA	CTCATTGGCTGAACCGGAGT
MC-13	3	lpg1689	ATCAAGCCATCTATAGATTCCTGAGATTTA	CCCGTGTTGCCGAATTTCAA	AGGATGTTCGTTCAGGTTGCT
MC-13	4	lpg0621	CTGACAATCGGATGGGAGTTCGATATTTTT	GGCTGAAATAGAGGACGCTCA	TCTCGCAGGGTTTGAAGGAC
MC-13	5	lpg1663	GTGTCGAGGCATACGGAGCTCGCATAGAAA	ATCCTGCCGCATCAATTCCA	ACCCATTTGTGTTGCCGCTA
MC-13	6	lpg2128	AACAAGGCTTTACTTTGACTATCCAAAGTC	AAAACCTGCAGCTACTGCCT	GCTCAGTTGCCGGAATTCTT
MC-13	7	lpg0921	TCTAATCTCAATAAGGTATCCTTATCTAAA	TGCCAGCTATGGCACTTTTC	ATTTCTTGCAACGTGCAGCC
MC-13	8	lpg2344	AGTCATTATTATGGTTCTCATAAAGAAATA	GCCAATATGAAAACCCCCGC	ACAAGAGCTATGGCTTCTGCAA
MC-13	9	lpg2793	TTAAATTTAAGGGGTTAATTGGTGGAGTCA	CTCTTCGCCGGCCGATTT	CCCAGAGCAGGCATTTCTTG
MC-13	10	lpg0902	CGACGCCGCACAGATGAGGGCTATAGTCAC	TTGGCGCGAATAAAGATGCG	TCGAGATCCCACCCTCAACT
MC-A	1	lpg2815	CAAGTAATAAGGGATTTTTTGGGGCTTAAT
MC-A	2	lpg2300	TTCCCCTGCACGCAGATAAGCATCAAAATC
MC-A	3	lpg2832	TTGGAAAAAAAAGGCATACAATTGAGGGTC
MC-A	4	lpg0107	GAAGATCAAGACGAGTCAAGTCTATGGTTT
MC-A	5	lpg0140	TGGAAATATTTTTAATAAATGACTAATAAT
MC-A	6	lpg3000	TTTGTGTCCAGTTTACTATCCTTCGGAATT
MC-A	7	lpg0103	TTTAAGTCTTTTAATTGAAGTTCATCTAAT
MC-B	1	lpg0294	TAAGGCATCTCTTGTGGGCAGTGTGTATTT	TGGCCAAGAAAGGCCAACTT	TGGCATCGTCTCCAATAGCAA
MC-B	2	lpg1836	GCTCTCTGATTTTAAATGTTTACCAATTAA	CAGTCCTGGCACCAACTGAA	CTGGGCTCGGAATTTGCTTG
MC-B	3	lpg0405	ACTCAATCCATTGATCTTCCATTCCAGCTC	TGCCAGAGCTGGAATGGAAG	CCTTGATACAGGCAGGTCCA
MC-B	4	lpg1661	ATCAAGGGATAAAAGGCGTTGGGGTTTTAA	CCCCAACGCCTTTTATCCCT	TGGGAAAACCAAATCCGCCA
MC-B	5	lpg2888	TTTTCAGGTAAGATTGAAGAATTAAACTAC	GCAATGCCAAAGGAAGCGAT	AGGCAACTTGCAGATCTCGT
MC-B	6	lpg0940	CTAAAACAGGTTCCTTTTCCTTGGTTTTTA	ACCCTTCTCGGCCCAGATTA	CAATGAGCCAGTCAAGCCCT
MC-B	7	lpg0376	CAATTAATTTAGAGAATTGGTTTTGCTTAA	CAGGCCTATCAAGCCGGTTA	TGGTGCATTCCTGGTGTTCA
MC-B	8	lpg0483	ATAATTTAAAACGGTCATTTGAGAACCATT	TGGCCATACAGCAGTGGAAG	TCATTACGGGGTGGTTCAGC
MC-B	9	lpg1907	ATTACGAATAAGAACAGCCCTTTGCTCTTC	ACCTTTCCAGAGTGGATGCC	ACCGGATCGTTACCTTGCTG
MC-B	10	lpg0963	TAAAAAGTTAAGGCTGGTTAGAGCTCCTGC	TTACCGAGCAGGAGTGGAGT	GCGGCTCCGAATAAAGGTTG
MC-C	1	lpg0130	TAGAAGTCGCTCTAGTGTATCAAATACCTG
MC-C	2	lpg2745	CTTGTAAAATAGCAGATAATCTTTTATCAC
MC-C	3	lpg2879	TTGTTCCAAACCCATTTTGAACCTTCCCAC
MC-C	4	lpg2975	ACTGCAGTTGGCTCTCTTTCAGTGCTTTTT
MC-C	5	lpg2311	GCATCAAAAAATTCTTTATTTTTGGCCATA
MC-C	6	lpg2322	CAGATAAATATCTTTAAGATTATAAACTCT
MC-C	7	lpg2607	AATTGGAGTTGGAAGAAAATACTATAAAAC
MC-C	8	lpg0733	TATATCCAATAACTCTTTTCCATCCTTTGG
MC-C	9	lpg1426	AGATTCCAGCAGTTGACTTATGACGTGCTG
MC-C	10	lpg0365	TGATGCTGGCTAAATAATCCTTATTTAAGA
MC-D	1	lpg0393	GCAATAAATTTTGGCCACTGCAGAAATAGA
MC-D	2	lpg2216	ATATATGCCTGTTCTGATTTCGCCTTTTCT
MC-D	3	lpg0008	CCAGTGCGTCACCATTGCCAAGTACTTCGT
MC-D	4	lpg0012	GAGCACGCCAAACTCATCTATTCGTAAATA
MC-D	5	lpg0921	TCTAATCTCAATAAGGTATCCTTATCTAAA
MC-D	6	lpg1166	AGCGCCCTTTCTTAGGTAACGGTATATATG
MC-D	7	lpg1602	ACTCAATTTGACAATGATTTTTTTAATGGA
MC-D	8	lpg1958	AGTCAAGGTGAGTTGCCCAGCTTGGAATTG
MC-D	9	lpg2351	TGATTGTAATGATTTTAGCAATACAGAAAA
MC-D	10	lpg2828	CAGGTTAATTATGTTTGTGCATGTAACCTT

## Sheet: File 1b
File 1b: TME Genes and Corresponding Spacer Sequences
Gene	Predicted TM Regions	Spacer
lpg0016	6	TACGATGTTCTTTATACCTATCGT
lpg0059	5 or 6	ACAAAGGCTGAATTATTGTTCTGT
lpg0086	6 or 8	AGCCTGATTTTCATCACTCGCATG
lpg0096	2	AAAATCGGTAAAAATAATAACTTT
lpg0107	1 or 2	CAAGACGAGTCAAGTCTATGGTTT
lpg0140	3 to 5	TATTTTTAATAAATGACTAATAAT
lpg0171	2	GTAACTTTTGGAGTCCAGGCTTTG
lpg0246	2	CCGTCGTACTCGTTCCAACGCATA
lpg0404	12	TACGGATACTGTCTACAGAGCCAA
lpg0439	2	TGGTTTTACAGTTTGTCATTAATA
lpg0518	1	ATGAGCGATTCAATTTCTGTTCTA
lpg0621	4	ATCGGATGGGAGTTCGATATTTTT
lpg0716	4 or 5	GTTTGCTATTAAAAAACATTAATG
lpg0879	6	TCATACTTTCCTTGTAATGCTTGG
lpg0963	2	AGTCATCGCGTAAAAAGTTAAGGC
lpg1099	3	ATAATGTAATTCCCAGATTAAAAA
lpg1137	6	CATTTCATAGGGCGTCAACAGATA
lpg1148	2	TCATTAAGTTGTCTGGCGTATTTT
lpg1525	6	TTATCTTTTTTAGAAGCATCATTT
lpg1527	3	AAAAATAGACCCAGGGAAGTTACA
lpg1621	2	GTTAACAGGTAAAGTGCGAAATTA
lpg1661	9 or 10	GGATAAAAGGCGTTGGGGTTTTAA
lpg1689	2	CCATCTATAGATTCCTGAGATTTA
lpg1701	2	TAACTAATTCCTCGATATTGCAGT
lpg1702	2	GATGATCAATAGAGAAGAAATTCT
lpg1776	2	TCGCAGTGGCTTTGATTACCACAG
lpg1907	3	AATAAGAACAGCCCTTTGCTCTTC
lpg1959	2	TTAATGCCGCCTTGAGAATTGTAT
lpg2223	2	TAGATAATACTTAAACTCTCCTGC
lpg2244	2	ATTTGGCTTTCAAGTCGCTTCTTA
lpg2271	2	CAAGAGCCGGGCATTGTTGTAAGA
lpg2552	8	TCTTCTTAAAACCATTATCACTTC
lpg2584	2	GGTTTCTATATTTTCAGTGATTCG
lpg2628	2	AAACAACATAACTTTAGTGAAAGT
lpg2692	2	CCAGGGATTTTAAACTGGGGACTT
lpg2733	6	CGTTTTAACTCATCCACTGGGGGT
lpg2804	4	GAGAACCTTAACCCGGTAATGATT
lpg2806	4 or 5	TATAGGCGTCAACGGATATTCAAT
lpg2815 (mavN)	8	ATAAGGGATTTTTTGGGGCTTAAT
lpg2874	Unclear	TTTCTGACTTCCATTTCAAATTGG
lpg2884	5	TCCAGAGTCAAACCAATCAAACCA
lpg2885	3 or 4	TATGCTGGCAAATGCCGCCAGAAC
lpg2888	7 or 8	GGTAAGATTGAAGAATTAAACTAC
lpg3000	7 or 8	TCCAGTTTACTATCCTTCGGAATT

## Sheet: File 1c
File 1c: PacBio Long-read Sequencing Metrics
	Input U-1A [A]	Output U-1A-T1	Output U-1A-T2	Input U-1B [C]	Output U-1B	Input U-2A [E]	Output U-2A-T1	Output U-2A-T2	Input U-2B [G]	Output U-2B	Input AC-1A [B]	Output AC-1A	Input AC-1B [D]	Output AC-1B	Input AC-2A [F]	Output AC-2A	Input AC-2B [H]	Output AC-2B
SMRTCell Multiplexing	3-plex/1 cell	3-plex/1 cell	3-plex/1 cell	8-plex/4 cells	8-plex/4 cells	6-plex/3 cells	6-plex/3 cells	6-plex/3 cells	8-plex/4 cells	8-plex/4 cells	8-plex/4 cells	8-plex/4 cells	4-plex/2 cells	4-plex/2 cells	8-plex/4 cells	8-plex/4 cells	4-plex/2 cells	4-plex/2 cells
Number of Reads	16269	40018	21542	38122	31935	62490	79125	36418	64480	78042	43258	40255	33174	36203	71639	111704	47434	51055
% Reads with an Exact Match to the Repeat Sequence	0.67	0.66	0.55	0.29	0.48	0.39	0.45	0.44	0.32	0.34	0.45	0.4	0.47	0.39	0.29	0.29	0.3	0.32
Number of Unique Arrays Observed	420	527	427	431	356	925	868	722	862	711	417	438	592	618	811	938	799	819
Average Length of a Read with a Repeat	10686	10973	10237	9012	10233	10701	11164	10598	10601	10665	10565	10073	10328	10383	10046	10501	10516	10614

## Sheet: File 1d
File 1d: Read Counts and Calculations for all Constructs from all Experiments			Raw Counts																			Raw Counts + 1 Pseudocount																			Raw Counts + 1 Pseudocount Normalized ((Read+PC)*(1/total reads with repeat sequences * 10,000))
Spacer combinations	Number of Spacers in Array	Number Exp. with Array	Input U-1A	Output U-1A-T1	Output U-1A-T2	Input U-1B	Output U-1B	Input U-2A	Output U-2A-T1	Output U-2A-T2	Input U-2B	Output U-2B	Input AC-1A	Output AC-1A	Input AC-1B	Output AC-1B	Input AC-2A	Output AC-2A	Input AC-2B	Output AC-2B		Input U-1A	Output U-1A-T1	Output U-1A-T2	Input U-1B	Output U-1B	Input U-2A	Output U-2A-T1	Output U-2A-T2	Input U-2B	Output U-2B	Input AC-1A	Output AC-1A	Input AC-1B	Output AC-1B	Input AC-2A	Output AC-2A	Input AC-2B	Output AC-2B		Input U-1A	Output U-1A-T1	Output U-1A-T2	Input U-1B	Output U-1B	Input U-2A	Output U-2A-T1	Output U-2A-T2	Input U-2B
lpg0016	1	18	4	19	9	6	2	41	78	32	19	53	4	4	3	8	20	31	17	15		5	20	10	7	3	42	79	33	20	54	5	5	4	9	21	32	18	16		4.588	7.58956	8.49979	6.44745	1.96541	17.0912	22.3796	20.4221	9.76801
lpg0016, lpg0059	2	17	1	5	3	1	3	10	16	3	7	8	2	3	0	2	5	10	3	3		2	6	4	2	4	11	17	4	8	9	3	4	1	3	6	11	4	4		1.8352	2.27687	3.39992	1.84213	2.62055	4.47628	4.81586	2.4754	3.9072
lpg0016, lpg0059, lpg0107, lpg0439	4	1	0	0	0	0	0	0	0	0	0	0	0	1	0	0	0	0	0	0		1	1	1	1	1	1	1	1	1	1	1	2	1	1	1	1	1	1		0.9176	0.379478	0.849979	0.921065	0.655136	0.406934	0.283286	0.61885	0.4884
lpg0016, lpg0059, lpg1525	3	9	1	2	4	1	1	0	0	0	0	0	1	1	2	12	0	0	0	0		2	3	5	2	2	1	1	1	1	1	2	2	3	13	1	1	1	1		1.8352	1.13843	4.24989	1.84213	1.31027	0.406934	0.283286	0.61885	0.4884
lpg0016, lpg0059, lpg1525, lpg2552, lpg2692	5	1	0	0	0	0	0	0	0	0	0	0	0	0	0	1	0	0	0	0		1	1	1	1	1	1	1	1	1	1	1	1	1	2	1	1	1	1		0.9176	0.379478	0.849979	0.921065	0.655136	0.406934	0.283286	0.61885	0.4884
lpg0016, lpg0059, lpg1525, lpg2692	4	9	6	32	17	20	15	0	0	0	0	0	6	11	17	82	0	0	0	0		7	33	18	21	16	1	1	1	1	1	7	12	18	83	1	1	1	1		6.4232	12.5228	15.2996	19.3424	10.4822	0.406934	0.283286	0.61885	0.4884
lpg0016, lpg0059, lpg1701	3	10	0	0	0	0	0	50	151	68	42	111	0	0	3	0	32	108	32	40		1	1	1	1	1	51	152	69	43	112	1	1	4	1	33	109	33	41		0.9176	0.379478	0.849979	0.921065	0.655136	20.7536	43.0595	42.7007	21.0012
lpg0016, lpg0059, lpg2223, lpg2692, lpg2815	5	1	0	0	0	0	0	0	0	0	0	0	0	0	0	1	0	0	0	0		1	1	1	1	1	1	1	1	1	1	1	1	1	2	1	1	1	1		0.9176	0.379478	0.849979	0.921065	0.655136	0.406934	0.283286	0.61885	0.4884
lpg0016, lpg0059, lpg2692	3	8	0	10	2	5	7	0	0	0	0	0	1	2	3	18	0	0	0	0		1	11	3	6	8	1	1	1	1	1	2	3	4	19	1	1	1	1		0.9176	4.17426	2.54994	5.52639	5.24109	0.406934	0.283286	0.61885	0.4884
lpg0016, lpg0059, lpg2874	3	9	2	15	6	5	4	0	0	0	0	0	1	9	5	7	0	0	0	0		3	16	7	6	5	1	1	1	1	1	2	10	6	8	1	1	1	1		2.7528	6.07165	5.94985	5.52639	3.27568	0.406934	0.283286	0.61885	0.4884
lpg0016, lpg0086	2	6	0	0	0	0	0	1	1	0	1	1	0	0	0	0	1	0	1	0		1	1	1	1	1	2	2	1	2	2	1	1	1	1	2	1	2	1		0.9176	0.379478	0.849979	0.921065	0.655136	0.813868	0.566572	0.61885	0.976801
lpg0016, lpg0086, lpg0246	3	9	0	0	0	0	0	3	5	1	7	6	0	0	0	0	5	1	3	2		1	1	1	1	1	4	6	2	8	7	1	1	1	1	6	2	4	3		0.9176	0.379478	0.849979	0.921065	0.655136	1.62774	1.69972	1.2377	3.9072
lpg0016, lpg0086, lpg0246, lpg0518	4	9	0	0	0	0	0	49	52	27	53	49	0	0	0	0	18	39	27	16		1	1	1	1	1	50	53	28	54	50	1	1	1	1	19	40	28	17		0.9176	0.379478	0.849979	0.921065	0.655136	20.3467	15.0142	17.3278	26.3736
lpg0016, lpg0086, lpg0246, lpg0518, lpg2692	5	1	0	0	0	0	0	0	0	0	0	0	0	0	0	0	0	0	0	1		1	1	1	1	1	1	1	1	1	1	1	1	1	1	1	1	1	2		0.9176	0.379478	0.849979	0.921065	0.655136	0.406934	0.283286	0.61885	0.4884
lpg0016, lpg0086, lpg0246, lpg1527, lpg1689, lpg1701, lpg2884	7	5	0	0	0	0	0	2	1	0	0	0	0	0	0	0	0	1	2	1		1	1	1	1	1	3	2	1	1	1	1	1	1	1	1	2	3	2		0.9176	0.379478	0.849979	0.921065	0.655136	1.2208	0.566572	0.61885	0.4884
lpg0016, lpg0086, lpg0246, lpg1689, lpg1701, lpg2884	6	1	0	0	0	0	0	0	0	0	0	0	0	0	0	0	0	1	0	0		1	1	1	1	1	1	1	1	1	1	1	1	1	1	1	2	1	1		0.9176	0.379478	0.849979	0.921065	0.655136	0.406934	0.283286	0.61885	0.4884
lpg0016, lpg0086, lpg0518	3	9	0	0	0	0	0	10	8	5	1	5	0	0	0	0	1	3	1	2		1	1	1	1	1	11	9	6	2	6	1	1	1	1	2	4	2	3		0.9176	0.379478	0.849979	0.921065	0.655136	4.47628	2.54958	3.7131	0.976801
lpg0016, lpg0086, lpg1527, lpg1689, lpg1701, lpg2884	6	1	0	0	0	0	0	1	0	0	0	0	0	0	0	0	0	0	0	0		1	1	1	1	1	2	1	1	1	1	1	1	1	1	1	1	1	1		0.9176	0.379478	0.849979	0.921065	0.655136	0.813868	0.283286	0.61885	0.4884
lpg0016, lpg0096	2	4	0	2	0	0	0	0	0	0	0	0	0	1	1	1	0	0	0	0		1	3	1	1	1	1	1	1	1	1	1	2	2	2	1	1	1	1		0.9176	1.13843	0.849979	0.921065	0.655136	0.406934	0.283286	0.61885	0.4884
lpg0016, lpg0096, lpg0404, lpg0716, lpg1661, lpg1907	6	1	0	0	0	1	0	0	0	0	0	0	0	0	0	0	0	0	0	0		1	1	1	2	1	1	1	1	1	1	1	1	1	1	1	1	1	1		0.9176	0.379478	0.849979	1.84213	0.655136	0.406934	0.283286	0.61885	0.4884
lpg0016, lpg0096, lpg2804	3	9	1	7	6	4	3	0	0	0	0	0	1	5	4	8	0	0	0	0		2	8	7	5	4	1	1	1	1	1	2	6	5	9	1	1	1	1		1.8352	3.03582	5.94985	4.60532	2.62055	0.406934	0.283286	0.61885	0.4884
lpg0016, lpg0107	2	9	13	53	17	2	14	0	0	0	0	0	5	23	10	18	0	0	0	0		14	54	18	3	15	1	1	1	1	1	6	24	11	19	1	1	1	1		12.8464	20.4918	15.2996	2.76319	9.82704	0.406934	0.283286	0.61885	0.4884
lpg0016, lpg0107, lpg0171, lpg1689, lpg1776, lpg2884	6	1	0	0	0	0	0	0	0	0	0	0	0	0	0	0	0	0	1	0		1	1	1	1	1	1	1	1	1	1	1	1	1	1	1	1	2	1		0.9176	0.379478	0.849979	0.921065	0.655136	0.406934	0.283286	0.61885	0.4884
lpg0016, lpg0107, lpg1148	3	1	0	0	0	0	0	0	0	0	0	0	0	0	0	0	0	0	0	1		1	1	1	1	1	1	1	1	1	1	1	1	1	1	1	1	1	2		0.9176	0.379478	0.849979	0.921065	0.655136	0.406934	0.283286	0.61885	0.4884
lpg0016, lpg0107, lpg1689	3	9	9	37	10	8	15	0	0	0	0	0	6	22	8	29	0	0	0	0		10	38	11	9	16	1	1	1	1	1	7	23	9	30	1	1	1	1		9.176	14.4202	9.34977	8.28958	10.4822	0.406934	0.283286	0.61885	0.4884
lpg0016, lpg0140	2	10	0	0	0	1	0	15	53	22	11	32	0	0	0	0	10	11	6	9		1	1	1	2	1	16	54	23	12	33	1	1	1	1	11	12	7	10		0.9176	0.379478	0.849979	1.84213	0.655136	6.51095	15.2975	14.2336	5.86081
lpg0016, lpg0140, lpg0246, lpg0404, lpg0439, lpg1701, lpg2692	7	1	0	0	0	0	0	1	0	0	0	0	0	0	0	0	0	0	0	0		1	1	1	1	1	2	1	1	1	1	1	1	1	1	1	1	1	1		0.9176	0.379478	0.849979	0.921065	0.655136	0.813868	0.283286	0.61885	0.4884
lpg0016, lpg0140, lpg0439, lpg1621	4	2	0	0	0	1	0	0	0	0	0	0	0	0	0	1	0	0	0	0		1	1	1	2	1	1	1	1	1	1	1	1	1	2	1	1	1	1		0.9176	0.379478	0.849979	1.84213	0.655136	0.406934	0.283286	0.61885	0.4884
lpg0016, lpg0140, lpg0439, lpg1621, lpg2884	5	6	1	0	0	1	2	0	0	0	0	0	4	4	1	0	0	0	0	0		2	1	1	2	3	1	1	1	1	1	5	5	2	1	1	1	1	1		1.8352	0.379478	0.849979	1.84213	1.96541	0.406934	0.283286	0.61885	0.4884
lpg0016, lpg0140, lpg0439, lpg2884	4	2	0	1	0	0	0	0	0	0	0	0	0	0	0	1	0	0	0	0		1	2	1	1	1	1	1	1	1	1	1	1	1	2	1	1	1	1		0.9176	0.758956	0.849979	0.921065	0.655136	0.406934	0.283286	0.61885	0.4884
lpg0016, lpg0140, lpg1525, lpg2223, lpg2552, lpg2692, lpg3000	7	1	0	0	0	0	0	0	1	0	0	0	0	0	0	0	0	0	0	0		1	1	1	1	1	1	2	1	1	1	1	1	1	1	1	1	1	1		0.9176	0.379478	0.849979	0.921065	0.655136	0.406934	0.566572	0.61885	0.4884
lpg0016, lpg0140, lpg1621	3	2	0	1	0	0	1	0	0	0	0	0	0	0	0	0	0	0	0	0		1	2	1	1	2	1	1	1	1	1	1	1	1	1	1	1	1	1		0.9176	0.758956	0.849979	0.921065	1.31027	0.406934	0.283286	0.61885	0.4884
lpg0016, lpg0140, lpg1621, lpg1776	4	8	6	35	10	7	11	0	0	0	0	0	1	0	4	11	0	0	0	0		7	36	11	8	12	1	1	1	1	1	2	1	5	12	1	1	1	1		6.4232	13.6612	9.34977	7.36852	7.86164	0.406934	0.283286	0.61885	0.4884
lpg0016, lpg0140, lpg1621, lpg2884	4	2	0	1	0	0	0	0	0	0	0	0	0	0	1	0	0	0	0	0		1	2	1	1	1	1	1	1	1	1	1	1	2	1	1	1	1	1		0.9176	0.758956	0.849979	0.921065	0.655136	0.406934	0.283286	0.61885	0.4884
lpg0016, lpg0140, lpg1776	3	3	0	2	3	0	2	0	0	0	0	0	0	0	0	0	0	0	0	0		1	3	4	1	3	1	1	1	1	1	1	1	1	1	1	1	1	1		0.9176	1.13843	3.39992	0.921065	1.96541	0.406934	0.283286	0.61885	0.4884
lpg0016, lpg0140, lpg2552	3	9	0	0	0	0	0	87	207	100	63	182	0	0	0	0	59	48	37	25		1	1	1	1	1	88	208	101	64	183	1	1	1	1	60	49	38	26		0.9176	0.379478	0.849979	0.921065	0.655136	35.8102	58.9235	62.5039	31.2576
lpg0016, lpg0140, lpg2552, lpg2874, lpg2884, lpg2885	6	1	0	0	0	0	0	0	0	0	0	0	0	0	0	0	1	0	0	0		1	1	1	1	1	1	1	1	1	1	1	1	1	1	2	1	1	1		0.9176	0.379478	0.849979	0.921065	0.655136	0.406934	0.283286	0.61885	0.4884
lpg0016, lpg0171	2	9	0	0	0	0	0	3	7	3	3	2	0	0	0	0	3	2	1	1		1	1	1	1	1	4	8	4	4	3	1	1	1	1	4	3	2	2		0.9176	0.379478	0.849979	0.921065	0.655136	1.62774	2.26629	2.4754	1.9536
lpg0016, lpg0171, lpg0518, lpg1621, lpg2628, lpg2733, lpg2884, lpg3000	8	1	0	0	0	0	0	0	0	1	0	0	0	0	0	0	0	0	0	0		1	1	1	1	1	1	1	2	1	1	1	1	1	1	1	1	1	1		0.9176	0.379478	0.849979	0.921065	0.655136	0.406934	0.283286	1.2377	0.4884
lpg0016, lpg0171, lpg1621	3	9	0	0	0	0	0	20	61	21	22	35	0	0	0	0	6	12	11	13		1	1	1	1	1	21	62	22	23	36	1	1	1	1	7	13	12	14		0.9176	0.379478	0.849979	0.921065	0.655136	8.54562	17.5637	13.6147	11.2332
lpg0016, lpg0171, lpg2628	3	4	0	0	0	0	0	0	1	0	0	1	0	0	0	0	1	0	1	0		1	1	1	1	1	1	2	1	1	2	1	1	1	1	2	1	2	1		0.9176	0.379478	0.849979	0.921065	0.655136	0.406934	0.566572	0.61885	0.4884
lpg0016, lpg0171, lpg2628, lpg2733	4	4	0	0	0	0	0	0	1	0	0	1	0	0	0	0	0	1	1	0		1	1	1	1	1	1	2	1	1	2	1	1	1	1	1	2	2	1		0.9176	0.379478	0.849979	0.921065	0.655136	0.406934	0.566572	0.61885	0.4884
lpg0016, lpg0171, lpg2628, lpg2733, lpg2884	5	6	0	0	0	0	0	3	5	1	1	1	0	0	0	0	0	0	0	2		1	1	1	1	1	4	6	2	2	2	1	1	1	1	1	1	1	3		0.9176	0.379478	0.849979	0.921065	0.655136	1.62774	1.69972	1.2377	0.976801
lpg0016, lpg0171, lpg2628, lpg2733, lpg2884, lpg3000	6	9	0	0	0	0	0	26	45	18	8	19	0	0	0	0	17	18	29	15		1	1	1	1	1	27	46	19	9	20	1	1	1	1	18	19	30	16		0.9176	0.379478	0.849979	0.921065	0.655136	10.9872	13.0312	11.7582	4.3956
lpg0016, lpg0171, lpg2628, lpg2733, lpg3000	5	7	0	0	0	0	0	3	1	2	0	2	0	0	0	0	0	4	3	3		1	1	1	1	1	4	2	3	1	3	1	1	1	1	1	5	4	4		0.9176	0.379478	0.849979	0.921065	0.655136	1.62774	0.566572	1.85655	0.4884
lpg0016, lpg0171, lpg2628, lpg2884	4	2	0	0	0	0	0	4	0	0	1	0	0	0	0	0	0	0	0	0		1	1	1	1	1	5	1	1	2	1	1	1	1	1	1	1	1	1		0.9176	0.379478	0.849979	0.921065	0.655136	2.03467	0.283286	0.61885	0.976801
lpg0016, lpg0171, lpg2628, lpg2884, lpg3000	5	9	0	0	0	0	0	4	18	4	2	5	0	0	0	0	4	3	4	2		1	1	1	1	1	5	19	5	3	6	1	1	1	1	5	4	5	3		0.9176	0.379478	0.849979	0.921065	0.655136	2.03467	5.38244	3.09425	1.4652
lpg0016, lpg0171, lpg2628, lpg3000	4	8	0	0	0	0	0	0	3	1	2	1	0	0	0	0	1	2	1	2		1	1	1	1	1	1	4	2	3	2	1	1	1	1	2	3	2	3		0.9176	0.379478	0.849979	0.921065	0.655136	0.406934	1.13314	1.2377	1.4652
lpg0016, lpg0171, lpg2733	3	1	0	0	0	0	0	0	1	0	0	0	0	0	0	0	0	0	0	0		1	1	1	1	1	1	2	1	1	1	1	1	1	1	1	1	1	1		0.9176	0.379478	0.849979	0.921065	0.655136	0.406934	0.566572	0.61885	0.4884
lpg0016, lpg0171, lpg2733, lpg2884	4	1	0	0	0	0	0	0	0	0	0	0	0	0	0	0	0	0	0	1		1	1	1	1	1	1	1	1	1	1	1	1	1	1	1	1	1	2		0.9176	0.379478	0.849979	0.921065	0.655136	0.406934	0.283286	0.61885	0.4884
lpg0016, lpg0171, lpg2733, lpg2884, lpg3000	5	7	0	0	0	0	0	2	5	0	1	0	0	0	0	0	2	2	4	2		1	1	1	1	1	3	6	1	2	1	1	1	1	1	3	3	5	3		0.9176	0.379478	0.849979	0.921065	0.655136	1.2208	1.69972	0.61885	0.976801
lpg0016, lpg0171, lpg2733, lpg3000	4	5	0	0	0	0	0	1	0	1	0	1	0	0	0	0	0	0	1	1		1	1	1	1	1	2	1	2	1	2	1	1	1	1	1	1	2	2		0.9176	0.379478	0.849979	0.921065	0.655136	0.813868	0.283286	1.2377	0.4884
lpg0016, lpg0171, lpg2884, lpg3000	4	4	0	0	0	0	0	0	2	1	0	0	0	0	0	0	1	1	0	0		1	1	1	1	1	1	3	2	1	1	1	1	1	1	2	2	1	1		0.9176	0.379478	0.849979	0.921065	0.655136	0.406934	0.849858	1.2377	0.4884
lpg0016, lpg0171, lpg3000	3	1	0	0	0	0	0	0	1	0	0	0	0	0	0	0	0	0	0	0		1	1	1	1	1	1	2	1	1	1	1	1	1	1	1	1	1	1		0.9176	0.379478	0.849979	0.921065	0.655136	0.406934	0.566572	0.61885	0.4884
lpg0016, lpg0246, lpg0518	3	9	0	0	0	0	0	1	1	2	1	1	0	0	0	0	2	1	1	1		1	1	1	1	1	2	2	3	2	2	1	1	1	1	3	2	2	2		0.9176	0.379478	0.849979	0.921065	0.655136	0.813868	0.566572	1.85655	0.976801
lpg0016, lpg0246, lpg1527, lpg1689, lpg1701	5	1	0	0	0	0	0	0	0	0	0	0	0	0	0	0	0	0	1	0		1	1	1	1	1	1	1	1	1	1	1	1	1	1	1	1	2	1		0.9176	0.379478	0.849979	0.921065	0.655136	0.406934	0.283286	0.61885	0.4884
lpg0016, lpg0246, lpg2874	3	4	0	2	1	0	0	0	0	0	0	0	1	0	1	0	0	0	0	0		1	3	2	1	1	1	1	1	1	1	2	1	2	1	1	1	1	1		0.9176	1.13843	1.69996	0.921065	0.655136	0.406934	0.283286	0.61885	0.4884
lpg0016, lpg0404	2	10	4	0	0	3	0	4	0	0	1	0	3	1	2	3	2	0	1	0		5	1	1	4	1	5	1	1	2	1	4	2	3	4	3	1	2	1		4.588	0.379478	0.849979	3.68426	0.655136	2.03467	0.283286	0.61885	0.976801
lpg0016, lpg0404, lpg0518, lpg1661, lpg2884, lpg2885	6	1	0	0	0	0	0	0	0	0	1	0	0	0	0	0	0	0	0	0		1	1	1	1	1	1	1	1	2	1	1	1	1	1	1	1	1	1		0.9176	0.379478	0.849979	0.921065	0.655136	0.406934	0.283286	0.61885	0.976801
lpg0016, lpg0404, lpg0716	3	5	0	2	0	1	0	0	0	0	0	0	2	0	5	2	0	0	0	0		1	3	1	2	1	1	1	1	1	1	3	1	6	3	1	1	1	1		0.9176	1.13843	0.849979	1.84213	0.655136	0.406934	0.283286	0.61885	0.4884
lpg0016, lpg0404, lpg0716, lpg1099, lpg1959, lpg2271	6	1	0	1	0	0	0	0	0	0	0	0	0	0	0	0	0	0	0	0		1	2	1	1	1	1	1	1	1	1	1	1	1	1	1	1	1	1		0.9176	0.758956	0.849979	0.921065	0.655136	0.406934	0.283286	0.61885	0.4884
lpg0016, lpg0404, lpg0716, lpg1959	4	10	22	9	7	46	3	0	0	0	0	0	22	1	56	36	0	0	1	0		23	10	8	47	4	1	1	1	1	1	23	2	57	37	1	1	2	1		21.1048	3.79478	6.79983	43.29	2.62055	0.406934	0.283286	0.61885	0.4884
lpg0016, lpg0404, lpg1621	3	9	0	0	0	0	0	31	5	5	28	5	0	0	0	0	37	8	19	3		1	1	1	1	1	32	6	6	29	6	1	1	1	1	38	9	20	4		0.9176	0.379478	0.849979	0.921065	0.655136	13.0219	1.69972	3.7131	14.1636
lpg0016, lpg0404, lpg1689, lpg1701, lpg1702, lpg2884, lpg2885	7	1	0	0	0	0	0	0	0	0	0	0	0	0	0	0	0	0	0	1		1	1	1	1	1	1	1	1	1	1	1	1	1	1	1	1	1	2		0.9176	0.379478	0.849979	0.921065	0.655136	0.406934	0.283286	0.61885	0.4884
lpg0016, lpg0404, lpg1689, lpg1702, lpg2804	5	3	0	0	0	0	0	1	0	0	0	0	0	0	0	0	0	2	1	0		1	1	1	1	1	2	1	1	1	1	1	1	1	1	1	3	2	1		0.9176	0.379478	0.849979	0.921065	0.655136	0.813868	0.283286	0.61885	0.4884
lpg0016, lpg0404, lpg1689, lpg2692, lpg2884, lpg2888	6	1	0	0	0	0	0	0	0	0	0	0	0	0	0	1	0	0	0	0		1	1	1	1	1	1	1	1	1	1	1	1	1	2	1	1	1	1		0.9176	0.379478	0.849979	0.921065	0.655136	0.406934	0.283286	0.61885	0.4884
lpg0016, lpg0404, lpg1689, lpg2804	4	1	0	0	0	0	0	0	0	0	0	0	0	0	0	0	1	0	0	0		1	1	1	1	1	1	1	1	1	1	1	1	1	1	2	1	1	1		0.9176	0.379478	0.849979	0.921065	0.655136	0.406934	0.283286	0.61885	0.4884
lpg0016, lpg0404, lpg1959	3	8	5	3	2	11	1	0	0	0	0	0	7	0	7	13	0	0	0	0		6	4	3	12	2	1	1	1	1	1	8	1	8	14	1	1	1	1		5.5056	1.51791	2.54994	11.0528	1.31027	0.406934	0.283286	0.61885	0.4884
lpg0016, lpg0404, lpg2884	3	4	0	0	0	1	0	0	0	0	0	0	1	0	2	4	0	0	0	0		1	1	1	2	1	1	1	1	1	1	2	1	3	5	1	1	1	1		0.9176	0.379478	0.849979	1.84213	0.655136	0.406934	0.283286	0.61885	0.4884
lpg0016, lpg0404, lpg2884, lpg2888	4	9	17	7	3	42	3	0	0	0	0	0	31	2	37	45	0	0	0	0		18	8	4	43	4	1	1	1	1	1	32	3	38	46	1	1	1	1		16.5168	3.03582	3.39992	39.6058	2.62055	0.406934	0.283286	0.61885	0.4884
lpg0016, lpg0404, lpg2888	3	6	1	0	0	5	0	0	0	0	0	0	3	0	6	7	0	0	1	0		2	1	1	6	1	1	1	1	1	1	4	1	7	8	1	1	2	1		1.8352	0.379478	0.849979	5.52639	0.655136	0.406934	0.283286	0.61885	0.4884
lpg0016, lpg0439	2	7	2	5	6	0	2	0	0	0	0	0	2	0	6	6	0	0	0	0		3	6	7	1	3	1	1	1	1	1	3	1	7	7	1	1	1	1		2.7528	2.27687	5.94985	0.921065	1.96541	0.406934	0.283286	0.61885	0.4884
lpg0016, lpg0439, lpg0716, lpg1099, lpg2885	5	1	0	0	0	0	0	0	0	0	0	0	0	0	0	1	0	0	0	0		1	1	1	1	1	1	1	1	1	1	1	1	1	2	1	1	1	1		0.9176	0.379478	0.849979	0.921065	0.655136	0.406934	0.283286	0.61885	0.4884
lpg0016, lpg0439, lpg1621, lpg2884	4	1	0	0	0	0	0	0	0	0	0	0	0	1	0	0	0	0	0	0		1	1	1	1	1	1	1	1	1	1	1	2	1	1	1	1	1	1		0.9176	0.379478	0.849979	0.921065	0.655136	0.406934	0.283286	0.61885	0.4884
lpg0016, lpg0439, lpg1702, lpg2884	4	1	0	0	0	0	0	0	0	0	0	0	0	0	0	1	0	0	0	0		1	1	1	1	1	1	1	1	1	1	1	1	1	2	1	1	1	1		0.9176	0.379478	0.849979	0.921065	0.655136	0.406934	0.283286	0.61885	0.4884
lpg0016, lpg0439, lpg2884	3	9	5	12	6	13	9	0	0	0	0	0	11	11	24	31	0	0	0	0		6	13	7	14	10	1	1	1	1	1	12	12	25	32	1	1	1	1		5.5056	4.93321	5.94985	12.8949	6.55136	0.406934	0.283286	0.61885	0.4884
lpg0016, lpg0439, lpg2888, lpg3000	4	1	0	0	0	0	0	0	0	0	0	0	0	0	1	0	0	0	0	0		1	1	1	1	1	1	1	1	1	1	1	1	2	1	1	1	1	1		0.9176	0.379478	0.849979	0.921065	0.655136	0.406934	0.283286	0.61885	0.4884
lpg0016, lpg0518	2	9	0	0	0	0	0	48	58	22	27	26	0	0	0	0	13	36	19	13		1	1	1	1	1	49	59	23	28	27	1	1	1	1	14	37	20	14		0.9176	0.379478	0.849979	0.921065	0.655136	19.9398	16.7139	14.2336	13.6752
lpg0016, lpg0518, lpg1661	3	9	0	0	0	0	0	15	39	18	14	34	0	0	0	0	10	23	10	8		1	1	1	1	1	16	40	19	15	35	1	1	1	1	11	24	11	9		0.9176	0.379478	0.849979	0.921065	0.655136	6.51095	11.3314	11.7582	7.32601
lpg0016, lpg0518, lpg3000	3	9	0	0	0	0	0	10	46	25	11	27	0	0	0	0	14	24	8	5		1	1	1	1	1	11	47	26	12	28	1	1	1	1	15	25	9	6		0.9176	0.379478	0.849979	0.921065	0.655136	4.47628	13.3144	16.0901	5.86081
lpg0016, lpg0716	2	4	0	1	0	2	0	0	0	0	0	0	2	0	2	0	0	0	0	0		1	2	1	3	1	1	1	1	1	1	3	1	3	1	1	1	1	1		0.9176	0.758956	0.849979	2.76319	0.655136	0.406934	0.283286	0.61885	0.4884
lpg0016, lpg0716, lpg1527	3	1	0	0	0	0	0	1	0	0	0	0	0	0	0	0	0	0	0	0		1	1	1	1	1	2	1	1	1	1	1	1	1	1	1	1	1	1		0.9176	0.379478	0.849979	0.921065	0.655136	0.813868	0.283286	0.61885	0.4884
lpg0016, lpg0716, lpg1527, lpg1701	4	7	0	0	0	0	0	3	3	0	0	3	0	0	0	0	1	3	1	2		1	1	1	1	1	4	4	1	1	4	1	1	1	1	2	4	2	3		0.9176	0.379478	0.849979	0.921065	0.655136	1.62774	1.13314	0.61885	0.4884
lpg0016, lpg0716, lpg1701	3	4	0	0	0	0	0	0	2	1	0	1	0	0	0	0	0	1	0	0		1	1	1	1	1	1	3	2	1	2	1	1	1	1	1	2	1	1		0.9176	0.379478	0.849979	0.921065	0.655136	0.406934	0.849858	1.2377	0.4884
lpg0016, lpg0716, lpg1959	3	4	4	0	0	0	0	0	0	0	0	0	1	0	6	2	0	0	0	0		5	1	1	1	1	1	1	1	1	1	2	1	7	3	1	1	1	1		4.588	0.379478	0.849979	0.921065	0.655136	0.406934	0.283286	0.61885	0.4884
lpg0016, lpg0963, lpg1137, lpg1525, lpg1621, lpg1702	6	1	0	0	0	0	0	0	0	1	0	0	0	0	0	0	0	0	0	0		1	1	1	1	1	1	1	2	1	1	1	1	1	1	1	1	1	1		0.9176	0.379478	0.849979	0.921065	0.655136	0.406934	0.283286	1.2377	0.4884
lpg0016, lpg0963, lpg1702, lpg2223, lpg2552, lpg2888, lpg3000	7	1	0	0	0	0	0	0	0	0	0	0	0	0	0	1	0	0	0	0		1	1	1	1	1	1	1	1	1	1	1	1	1	2	1	1	1	1		0.9176	0.379478	0.849979	0.921065	0.655136	0.406934	0.283286	0.61885	0.4884
lpg0016, lpg1148	2	9	0	0	0	0	0	6	3	3	12	6	0	0	0	0	4	2	7	6		1	1	1	1	1	7	4	4	13	7	1	1	1	1	5	3	8	7		0.9176	0.379478	0.849979	0.921065	0.655136	2.84854	1.13314	2.4754	6.34921
lpg0016, lpg1148, lpg1621	3	9	0	0	0	0	0	9	31	12	11	24	0	0	0	0	4	11	10	4		1	1	1	1	1	10	32	13	12	25	1	1	1	1	5	12	11	5		0.9176	0.379478	0.849979	0.921065	0.655136	4.06934	9.06516	8.04505	5.86081
lpg0016, lpg1148, lpg1621, lpg2552, lpg2584, lpg2885	6	1	0	0	0	0	0	0	0	0	0	1	0	0	0	0	0	0	0	0		1	1	1	1	1	1	1	1	1	2	1	1	1	1	1	1	1	1		0.9176	0.379478	0.849979	0.921065	0.655136	0.406934	0.283286	0.61885	0.4884
lpg0016, lpg1148, lpg2815	3	6	0	0	0	0	0	27	0	0	33	0	0	0	0	0	24	31	23	22		1	1	1	1	1	28	1	1	34	1	1	1	1	1	25	32	24	23		0.9176	0.379478	0.849979	0.921065	0.655136	11.3942	0.283286	0.61885	16.6056
lpg0016, lpg1525	2	3	0	2	0	0	2	0	0	0	0	0	0	0	1	0	0	0	0	0		1	3	1	1	3	1	1	1	1	1	1	1	2	1	1	1	1	1		0.9176	1.13843	0.849979	0.921065	1.96541	0.406934	0.283286	0.61885	0.4884
lpg0016, lpg1525, lpg2692	3	8	1	5	1	0	3	0	0	0	0	0	1	2	3	7	0	0	0	0		2	6	2	1	4	1	1	1	1	1	2	3	4	8	1	1	1	1		1.8352	2.27687	1.69996	0.921065	2.62055	0.406934	0.283286	0.61885	0.4884
lpg0016, lpg1527	2	9	0	0	0	0	0	67	221	93	67	108	0	0	0	0	47	57	48	51		1	1	1	1	1	68	222	94	68	109	1	1	1	1	48	58	49	52		0.9176	0.379478	0.849979	0.921065	0.655136	27.6715	62.8895	58.1719	33.2112
lpg0016, lpg1527, lpg1621	3	9	0	0	0	0	0	36	110	48	21	46	0	0	0	0	20	38	32	25		1	1	1	1	1	37	111	49	22	47	1	1	1	1	21	39	33	26		0.9176	0.379478	0.849979	0.921065	0.655136	15.0566	31.4448	30.3237	10.7448
lpg0016, lpg1527, lpg1701	3	2	0	0	0	0	0	1	0	0	0	0	0	0	0	0	0	1	0	0		1	1	1	1	1	2	1	1	1	1	1	1	1	1	1	2	1	1		0.9176	0.379478	0.849979	0.921065	0.655136	0.813868	0.283286	0.61885	0.4884
lpg0016, lpg1621	2	14	0	3	1	0	2	18	44	14	7	10	0	1	1	0	6	12	6	11		1	4	2	1	3	19	45	15	8	11	1	2	2	1	7	13	7	12		0.9176	1.51791	1.69996	0.921065	1.96541	7.73175	12.7479	9.28275	3.9072
lpg0016, lpg1621, lpg1776	3	7	0	7	1	1	3	0	0	0	0	0	0	1	1	1	0	0	0	0		1	8	2	2	4	1	1	1	1	1	1	2	2	2	1	1	1	1		0.9176	3.03582	1.69996	1.84213	2.62055	0.406934	0.283286	0.61885	0.4884
lpg0016, lpg1621, lpg1959	3	9	6	24	13	7	11	0	0	0	0	0	6	19	5	10	0	0	0	0		7	25	14	8	12	1	1	1	1	1	7	20	6	11	1	1	1	1		6.4232	9.48695	11.8997	7.36852	7.86164	0.406934	0.283286	0.61885	0.4884
lpg0016, lpg1621, lpg2804	3	1	0	0	0	0	0	0	1	0	0	0	0	0	0	0	0	0	0	0		1	1	1	1	1	1	2	1	1	1	1	1	1	1	1	1	1	1		0.9176	0.379478	0.849979	0.921065	0.655136	0.406934	0.566572	0.61885	0.4884
lpg0016, lpg1621, lpg2884	3	2	0	0	0	0	0	0	0	0	0	0	0	1	0	1	0	0	0	0		1	1	1	1	1	1	1	1	1	1	1	2	1	2	1	1	1	1		0.9176	0.379478	0.849979	0.921065	0.655136	0.406934	0.283286	0.61885	0.4884
lpg0016, lpg1661	2	4	0	0	0	0	0	0	5	0	1	0	0	0	0	0	1	0	1	0		1	1	1	1	1	1	6	1	2	1	1	1	1	1	2	1	2	1		0.9176	0.379478	0.849979	0.921065	0.655136	0.406934	1.69972	0.61885	0.976801
lpg0016, lpg1689	2	12	1	2	0	0	1	2	4	2	0	3	1	2	0	3	3	0	0	2		2	3	1	1	2	3	5	3	1	4	2	3	1	4	4	1	1	3		1.8352	1.13843	0.849979	0.921065	1.31027	1.2208	1.41643	1.85655	0.4884
lpg0016, lpg1689, lpg1701	3	6	0	0	0	0	0	0	5	2	1	1	0	0	0	0	1	4	0	0		1	1	1	1	1	1	6	3	2	2	1	1	1	1	2	5	1	1		0.9176	0.379478	0.849979	0.921065	0.655136	0.406934	1.69972	1.85655	0.976801
lpg0016, lpg1689, lpg1701, lpg1702	4	9	0	0	0	0	0	11	36	20	6	19	0	0	0	0	5	9	5	7		1	1	1	1	1	12	37	21	7	20	1	1	1	1	6	10	6	8		0.9176	0.379478	0.849979	0.921065	0.655136	4.88321	10.4816	12.9959	3.4188
lpg0016, lpg1689, lpg1701, lpg1702, lpg2552, lpg2885	6	1	0	0	0	0	0	0	0	0	1	0	0	0	0	0	0	0	0	0		1	1	1	1	1	1	1	1	2	1	1	1	1	1	1	1	1	1		0.9176	0.379478	0.849979	0.921065	0.655136	0.406934	0.283286	0.61885	0.976801
lpg0016, lpg1689, lpg1701, lpg2552	4	1	0	0	0	0	0	0	1	0	0	0	0	0	0	0	0	0	0	0		1	1	1	1	1	1	2	1	1	1	1	1	1	1	1	1	1	1		0.9176	0.379478	0.849979	0.921065	0.655136	0.406934	0.566572	0.61885	0.4884
lpg0016, lpg1689, lpg1702	3	9	0	0	0	0	0	4	15	5	9	7	0	0	0	0	4	8	5	5		1	1	1	1	1	5	16	6	10	8	1	1	1	1	5	9	6	6		0.9176	0.379478	0.849979	0.921065	0.655136	2.03467	4.53258	3.7131	4.884
lpg0016, lpg1701	2	10	0	0	0	0	0	190	145	71	32	70	0	0	2	0	61	79	32	42		1	1	1	1	1	191	146	72	33	71	1	1	3	1	62	80	33	43		0.9176	0.379478	0.849979	0.921065	0.655136	77.7244	41.3598	44.5572	16.1172
lpg0016, lpg1701, lpg1702	3	3	0	0	0	0	0	1	2	0	0	1	0	0	0	0	0	0	0	0		1	1	1	1	1	2	3	1	1	2	1	1	1	1	1	1	1	1		0.9176	0.379478	0.849979	0.921065	0.655136	0.813868	0.849858	0.61885	0.4884
lpg0016, lpg1702	2	11	1	7	4	1	9	0	1	0	0	1	1	7	4	7	0	0	0	0		2	8	5	2	10	1	2	1	1	2	2	8	5	8	1	1	1	1		1.8352	3.03582	4.24989	1.84213	6.55136	0.406934	0.566572	0.61885	0.4884
lpg0016, lpg1702, lpg2223	3	9	5	33	23	13	27	0	0	0	0	0	6	27	11	33	0	0	0	0		6	34	24	14	28	1	1	1	1	1	7	28	12	34	1	1	1	1		5.5056	12.9022	20.3995	12.8949	18.3438	0.406934	0.283286	0.61885	0.4884
lpg0016, lpg1776	2	3	0	0	3	0	0	0	0	0	0	0	0	0	1	2	0	0	0	0		1	1	4	1	1	1	1	1	1	1	1	1	2	3	1	1	1	1		0.9176	0.379478	3.39992	0.921065	0.655136	0.406934	0.283286	0.61885	0.4884
lpg0016, lpg1959	2	8	0	6	2	1	2	0	0	0	0	0	1	2	1	2	0	0	0	0		1	7	3	2	3	1	1	1	1	1	2	3	2	3	1	1	1	1		0.9176	2.65634	2.54994	1.84213	1.96541	0.406934	0.283286	0.61885	0.4884
lpg0016, lpg2223	2	3	0	5	1	0	0	0	0	0	0	0	0	0	0	2	0	0	0	0		1	6	2	1	1	1	1	1	1	1	1	1	1	3	1	1	1	1		0.9176	2.27687	1.69996	0.921065	0.655136	0.406934	0.283286	0.61885	0.4884
lpg0016, lpg2223, lpg2271	3	3	0	2	0	1	0	0	0	0	0	0	0	2	0	0	0	0	0	0		1	3	1	2	1	1	1	1	1	1	1	3	1	1	1	1	1	1		0.9176	1.13843	0.849979	1.84213	0.655136	0.406934	0.283286	0.61885	0.4884
lpg0016, lpg2271	2	3	0	30	0	1	0	0	0	0	0	0	0	2	0	0	0	0	0	0		1	31	1	2	1	1	1	1	1	1	1	3	1	1	1	1	1	1		0.9176	11.7638	0.849979	1.84213	0.655136	0.406934	0.283286	0.61885	0.4884
lpg0016, lpg2552	2	6	0	0	0	0	0	1	4	1	2	5	0	0	0	0	0	0	1	0		1	1	1	1	1	2	5	2	3	6	1	1	1	1	1	1	2	1		0.9176	0.379478	0.849979	0.921065	0.655136	0.813868	1.41643	1.2377	1.4652
lpg0016, lpg2584	2	2	0	0	0	0	0	0	29	0	0	63	0	0	0	0	0	0	0	0		1	1	1	1	1	1	30	1	1	64	1	1	1	1	1	1	1	1		0.9176	0.379478	0.849979	0.921065	0.655136	0.406934	8.49858	0.61885	0.4884
lpg0016, lpg2584, lpg2884, lpg2885, lpg3000	5	1	0	0	0	0	0	0	1	0	0	0	0	0	0	0	0	0	0	0		1	1	1	1	1	1	2	1	1	1	1	1	1	1	1	1	1	1		0.9176	0.379478	0.849979	0.921065	0.655136	0.406934	0.566572	0.61885	0.4884
lpg0016, lpg2628	2	1	0	0	0	0	0	1	0	0	0	0	0	0	0	0	0	0	0	0		1	1	1	1	1	2	1	1	1	1	1	1	1	1	1	1	1	1		0.9176	0.379478	0.849979	0.921065	0.655136	0.813868	0.283286	0.61885	0.4884
lpg0016, lpg2628, lpg2733, lpg2884	4	2	0	0	0	0	0	0	0	1	0	0	0	0	0	0	1	0	0	0		1	1	1	1	1	1	1	2	1	1	1	1	1	1	2	1	1	1		0.9176	0.379478	0.849979	0.921065	0.655136	0.406934	0.283286	1.2377	0.4884
lpg0016, lpg2628, lpg2733, lpg2884, lpg3000	5	8	0	0	0	0	0	1	6	3	1	2	0	0	0	0	1	3	1	0		1	1	1	1	1	2	7	4	2	3	1	1	1	1	2	4	2	1		0.9176	0.379478	0.849979	0.921065	0.655136	0.813868	1.983	2.4754	0.976801
lpg0016, lpg2628, lpg2733, lpg3000	4	4	0	0	0	0	0	0	3	0	1	0	0	0	0	0	0	1	0	1		1	1	1	1	1	1	4	1	2	1	1	1	1	1	1	2	1	2		0.9176	0.379478	0.849979	0.921065	0.655136	0.406934	1.13314	0.61885	0.976801
lpg0016, lpg2628, lpg2884	3	1	0	0	0	0	0	0	0	0	0	1	0	0	0	0	0	0	0	0		1	1	1	1	1	1	1	1	1	2	1	1	1	1	1	1	1	1		0.9176	0.379478	0.849979	0.921065	0.655136	0.406934	0.283286	0.61885	0.4884
lpg0016, lpg2628, lpg2884, lpg3000	4	4	0	0	0	0	0	0	3	1	0	1	0	0	0	0	0	1	0	0		1	1	1	1	1	1	4	2	1	2	1	1	1	1	1	2	1	1		0.9176	0.379478	0.849979	0.921065	0.655136	0.406934	1.13314	1.2377	0.4884
lpg0016, lpg2628, lpg3000	3	2	0	0	0	0	0	1	0	0	0	0	0	0	0	0	0	1	0	0		1	1	1	1	1	2	1	1	1	1	1	1	1	1	1	2	1	1		0.9176	0.379478	0.849979	0.921065	0.655136	0.813868	0.283286	0.61885	0.4884
lpg0016, lpg2692	2	5	1	3	0	0	2	0	0	0	0	0	0	0	1	3	0	0	0	0		2	4	1	1	3	1	1	1	1	1	1	1	2	4	1	1	1	1		1.8352	1.51791	0.849979	0.921065	1.96541	0.406934	0.283286	0.61885	0.4884
lpg0016, lpg2733, lpg2884, lpg3000	4	2	0	0	0	0	0	0	0	0	0	0	0	0	0	0	2	1	0	0		1	1	1	1	1	1	1	1	1	1	1	1	1	1	3	2	1	1		0.9176	0.379478	0.849979	0.921065	0.655136	0.406934	0.283286	0.61885	0.4884
lpg0016, lpg2733, lpg3000	3	3	0	0	0	0	0	0	1	1	0	1	0	0	0	0	0	0	0	0		1	1	1	1	1	1	2	2	1	2	1	1	1	1	1	1	1	1		0.9176	0.379478	0.849979	0.921065	0.655136	0.406934	0.566572	1.2377	0.4884
lpg0016, lpg2804	2	4	0	2	2	0	2	0	0	0	0	0	0	1	0	0	0	0	0	0		1	3	3	1	3	1	1	1	1	1	1	2	1	1	1	1	1	1		0.9176	1.13843	2.54994	0.921065	1.96541	0.406934	0.283286	0.61885	0.4884
lpg0016, lpg2815	2	5	0	0	0	0	0	4	0	0	3	0	0	0	0	0	1	6	0	1		1	1	1	1	1	5	1	1	4	1	1	1	1	1	2	7	1	2		0.9176	0.379478	0.849979	0.921065	0.655136	2.03467	0.283286	0.61885	1.9536
lpg0016, lpg2874	2	4	1	4	0	0	0	0	0	0	0	0	0	0	1	1	0	0	0	0		2	5	1	1	1	1	1	1	1	1	1	1	2	2	1	1	1	1		1.8352	1.89739	0.849979	0.921065	0.655136	0.406934	0.283286	0.61885	0.4884
lpg0016, lpg2884	2	13	3	0	0	2	1	2	2	2	1	2	1	1	5	4	0	0	0	1		4	1	1	3	2	3	3	3	2	3	2	2	6	5	1	1	1	2		3.6704	0.379478	0.849979	2.76319	1.31027	1.2208	0.849858	1.85655	0.976801
lpg0016, lpg2884, lpg2888	3	6	1	0	0	2	0	0	0	0	0	0	5	1	1	2	0	0	0	0		2	1	1	3	1	1	1	1	1	1	6	2	2	3	1	1	1	1		1.8352	0.379478	0.849979	2.76319	0.655136	0.406934	0.283286	0.61885	0.4884
lpg0016, lpg2884, lpg3000	3	9	0	0	0	0	0	9	27	3	6	14	0	0	0	0	6	3	5	4		1	1	1	1	1	10	28	4	7	15	1	1	1	1	7	4	6	5		0.9176	0.379478	0.849979	0.921065	0.655136	4.06934	7.93201	2.4754	3.4188
lpg0016, lpg2888	2	5	1	0	0	1	0	0	0	0	0	0	1	0	5	1	0	0	0	0		2	1	1	2	1	1	1	1	1	1	2	1	6	2	1	1	1	1		1.8352	0.379478	0.849979	1.84213	0.655136	0.406934	0.283286	0.61885	0.4884
lpg0016, lpg3000	2	9	0	0	0	0	0	3	7	4	2	1	0	0	0	0	2	1	1	1		1	1	1	1	1	4	8	5	3	2	1	1	1	1	3	2	2	2		0.9176	0.379478	0.849979	0.921065	0.655136	1.62774	2.26629	3.09425	1.4652
lpg0059	1	18	109	565	204	160	275	98	247	120	75	170	192	293	273	467	169	244	61	147		110	566	205	161	276	99	248	121	76	171	193	294	274	468	170	245	62	148		100.936	214.784	174.246	148.291	180.818	40.2865	70.255	74.8809	37.1184
lpg0059, lpg0086, lpg0107, lpg0518, lpg1661, lpg2552	6	1	0	0	0	0	0	0	0	0	0	0	0	0	1	0	0	0	0	0		1	1	1	1	1	1	1	1	1	1	1	1	2	1	1	1	1	1		0.9176	0.379478	0.849979	0.921065	0.655136	0.406934	0.283286	0.61885	0.4884
lpg0059, lpg0086, lpg0246, lpg0439, lpg1661, lpg3000	6	1	0	0	0	0	0	0	0	0	0	0	0	1	0	0	0	0	0	0		1	1	1	1	1	1	1	1	1	1	1	2	1	1	1	1	1	1		0.9176	0.379478	0.849979	0.921065	0.655136	0.406934	0.283286	0.61885	0.4884
lpg0059, lpg0086, lpg0246, lpg0439, lpg3000	5	1	0	0	0	0	0	0	0	0	0	0	0	0	1	0	0	0	0	0		1	1	1	1	1	1	1	1	1	1	1	1	2	1	1	1	1	1		0.9176	0.379478	0.849979	0.921065	0.655136	0.406934	0.283286	0.61885	0.4884
lpg0059, lpg0086, lpg0439, lpg3000	4	1	0	0	0	0	0	0	0	0	0	0	1	0	0	0	0	0	0	0		1	1	1	1	1	1	1	1	1	1	2	1	1	1	1	1	1	1		0.9176	0.379478	0.849979	0.921065	0.655136	0.406934	0.283286	0.61885	0.4884
lpg0059, lpg0086, lpg0963, lpg3000	4	1	0	0	0	0	0	0	0	0	0	0	0	0	1	0	0	0	0	0		1	1	1	1	1	1	1	1	1	1	1	1	2	1	1	1	1	1		0.9176	0.379478	0.849979	0.921065	0.655136	0.406934	0.283286	0.61885	0.4884
lpg0059, lpg0096	2	3	1	1	0	0	0	0	0	0	0	0	0	1	0	0	0	0	0	0		2	2	1	1	1	1	1	1	1	1	1	2	1	1	1	1	1	1		1.8352	0.758956	0.849979	0.921065	0.655136	0.406934	0.283286	0.61885	0.4884
lpg0059, lpg0096, lpg0518, lpg2815	4	1	0	0	0	0	0	0	0	0	0	0	0	0	0	0	0	0	0	1		1	1	1	1	1	1	1	1	1	1	1	1	1	1	1	1	1	2		0.9176	0.379478	0.849979	0.921065	0.655136	0.406934	0.283286	0.61885	0.4884
lpg0059, lpg0096, lpg1689	3	9	2	16	6	11	8	0	0	0	0	0	4	12	2	14	0	0	0	0		3	17	7	12	9	1	1	1	1	1	5	13	3	15	1	1	1	1		2.7528	6.45112	5.94985	11.0528	5.89623	0.406934	0.283286	0.61885	0.4884
lpg0059, lpg0107, lpg0439, lpg1137, lpg2584	5	1	0	0	0	0	1	0	0	0	0	0	0	0	0	0	0	0	0	0		1	1	1	1	2	1	1	1	1	1	1	1	1	1	1	1	1	1		0.9176	0.379478	0.849979	0.921065	1.31027	0.406934	0.283286	0.61885	0.4884
lpg0059, lpg0107, lpg0879, lpg1661, lpg2804, lpg2815	6	1	0	0	0	0	0	0	0	0	0	0	0	0	0	0	0	1	0	0		1	1	1	1	1	1	1	1	1	1	1	1	1	1	1	2	1	1		0.9176	0.379478	0.849979	0.921065	0.655136	0.406934	0.283286	0.61885	0.4884
lpg0059, lpg0107, lpg0963, lpg1099, lpg1527, lpg1959	6	1	0	0	0	0	0	0	0	0	0	0	0	0	0	1	0	0	0	0		1	1	1	1	1	1	1	1	1	1	1	1	1	2	1	1	1	1		0.9176	0.379478	0.849979	0.921065	0.655136	0.406934	0.283286	0.61885	0.4884
lpg0059, lpg0107, lpg1527, lpg1621	4	2	0	0	0	0	1	0	0	0	0	0	0	0	1	0	0	0	0	0		1	1	1	1	2	1	1	1	1	1	1	1	2	1	1	1	1	1		0.9176	0.379478	0.849979	0.921065	1.31027	0.406934	0.283286	0.61885	0.4884
lpg0059, lpg0107, lpg1527, lpg1621, lpg2271	5	2	0	0	0	0	0	0	0	0	0	0	0	0	1	1	0	0	0	0		1	1	1	1	1	1	1	1	1	1	1	1	2	2	1	1	1	1		0.9176	0.379478	0.849979	0.921065	0.655136	0.406934	0.283286	0.61885	0.4884
lpg0059, lpg0107, lpg1527, lpg1621, lpg2271, lpg2885	6	7	1	2	2	3	0	0	0	0	0	0	2	0	5	6	0	0	0	0		2	3	3	4	1	1	1	1	1	1	3	1	6	7	1	1	1	1		1.8352	1.13843	2.54994	3.68426	0.655136	0.406934	0.283286	0.61885	0.4884
lpg0059, lpg0107, lpg1527, lpg1621, lpg2885	5	1	0	0	0	0	0	0	0	0	0	0	0	0	0	2	0	0	0	0		1	1	1	1	1	1	1	1	1	1	1	1	1	3	1	1	1	1		0.9176	0.379478	0.849979	0.921065	0.655136	0.406934	0.283286	0.61885	0.4884
lpg0059, lpg0107, lpg1527, lpg2271	4	1	0	0	0	0	1	0	0	0	0	0	0	0	0	0	0	0	0	0		1	1	1	1	2	1	1	1	1	1	1	1	1	1	1	1	1	1		0.9176	0.379478	0.849979	0.921065	1.31027	0.406934	0.283286	0.61885	0.4884
lpg0059, lpg0107, lpg1527, lpg2271, lpg2885	5	2	1	0	0	0	0	0	0	0	0	0	0	0	0	1	0	0	0	0		2	1	1	1	1	1	1	1	1	1	1	1	1	2	1	1	1	1		1.8352	0.379478	0.849979	0.921065	0.655136	0.406934	0.283286	0.61885	0.4884
lpg0059, lpg0107, lpg1527, lpg2885	4	1	0	0	0	0	0	0	0	0	0	0	0	0	1	0	0	0	0	0		1	1	1	1	1	1	1	1	1	1	1	1	2	1	1	1	1	1		0.9176	0.379478	0.849979	0.921065	0.655136	0.406934	0.283286	0.61885	0.4884
lpg0059, lpg0107, lpg1621, lpg2271, lpg2885	5	2	0	0	0	0	0	0	0	0	0	0	0	0	2	3	0	0	0	0		1	1	1	1	1	1	1	1	1	1	1	1	3	4	1	1	1	1		0.9176	0.379478	0.849979	0.921065	0.655136	0.406934	0.283286	0.61885	0.4884
lpg0059, lpg0140	2	10	5	26	14	6	6	0	1	0	0	0	24	2	4	10	0	0	0	0		6	27	15	7	7	1	2	1	1	1	25	3	5	11	1	1	1	1		5.5056	10.2459	12.7497	6.44745	4.58595	0.406934	0.566572	0.61885	0.4884
lpg0059, lpg0140, lpg0171, lpg1907	4	6	0	0	0	0	0	2	2	1	3	3	0	0	0	0	0	1	0	0		1	1	1	1	1	3	3	2	4	4	1	1	1	1	1	2	1	1		0.9176	0.379478	0.849979	0.921065	0.655136	1.2208	0.849858	1.2377	1.9536
lpg0059, lpg0140, lpg0171, lpg1907, lpg2733	5	5	0	0	0	0	0	2	5	2	0	5	0	0	0	0	0	2	0	0		1	1	1	1	1	3	6	3	1	6	1	1	1	1	1	3	1	1		0.9176	0.379478	0.849979	0.921065	0.655136	1.2208	1.69972	1.85655	0.4884
lpg0059, lpg0140, lpg0171, lpg1907, lpg2733, lpg3000	6	9	0	0	0	0	0	12	51	11	11	38	0	0	0	0	5	7	4	2		1	1	1	1	1	13	52	12	12	39	1	1	1	1	6	8	5	3		0.9176	0.379478	0.849979	0.921065	0.655136	5.29014	14.7309	7.4262	5.86081
lpg0059, lpg0140, lpg0171, lpg1907, lpg3000	5	7	0	0	0	0	0	3	11	6	3	10	0	0	0	0	0	1	1	0		1	1	1	1	1	4	12	7	4	11	1	1	1	1	1	2	2	1		0.9176	0.379478	0.849979	0.921065	0.655136	1.62774	3.39943	4.33195	1.9536
lpg0059, lpg0140, lpg0171, lpg2733	4	2	0	0	0	0	0	0	0	1	0	1	0	0	0	0	0	0	0	0		1	1	1	1	1	1	1	2	1	2	1	1	1	1	1	1	1	1		0.9176	0.379478	0.849979	0.921065	0.655136	0.406934	0.283286	1.2377	0.4884
lpg0059, lpg0140, lpg0171, lpg2733, lpg3000	5	6	0	0	0	0	0	1	5	0	1	3	0	0	0	0	0	1	0	1		1	1	1	1	1	2	6	1	2	4	1	1	1	1	1	2	1	2		0.9176	0.379478	0.849979	0.921065	0.655136	0.813868	1.69972	0.61885	0.976801
lpg0059, lpg0140, lpg0171, lpg3000	4	4	0	0	0	0	0	0	2	0	1	3	0	0	0	0	1	0	0	0		1	1	1	1	1	1	3	1	2	4	1	1	1	1	2	1	1	1		0.9176	0.379478	0.849979	0.921065	0.655136	0.406934	0.849858	0.61885	0.976801
lpg0059, lpg0140, lpg0246	3	10	61	203	69	159	40	0	0	0	0	0	228	21	55	68	0	0	1	0		62	204	70	160	41	1	1	1	1	1	229	22	56	69	1	1	2	1		56.8912	77.4135	59.4985	147.37	26.8606	0.406934	0.283286	0.61885	0.4884
lpg0059, lpg0140, lpg0404	3	2	0	0	0	1	0	0	0	0	0	0	0	1	0	0	0	0	0	0		1	1	1	2	1	1	1	1	1	1	1	2	1	1	1	1	1	1		0.9176	0.379478	0.849979	1.84213	0.655136	0.406934	0.283286	0.61885	0.4884
lpg0059, lpg0140, lpg0439, lpg1776, lpg2244	5	1	0	0	0	0	0	0	0	0	0	0	0	0	1	0	0	0	0	0		1	1	1	1	1	1	1	1	1	1	1	1	2	1	1	1	1	1		0.9176	0.379478	0.849979	0.921065	0.655136	0.406934	0.283286	0.61885	0.4884
lpg0059, lpg0140, lpg0439, lpg2584	4	1	0	0	0	0	0	0	0	0	0	0	0	0	1	0	0	0	0	0		1	1	1	1	1	1	1	1	1	1	1	1	2	1	1	1	1	1		0.9176	0.379478	0.849979	0.921065	0.655136	0.406934	0.283286	0.61885	0.4884
lpg0059, lpg0140, lpg0963	3	1	0	0	1	0	0	0	0	0	0	0	0	0	0	0	0	0	0	0		1	1	2	1	1	1	1	1	1	1	1	1	1	1	1	1	1	1		0.9176	0.379478	1.69996	0.921065	0.655136	0.406934	0.283286	0.61885	0.4884
lpg0059, lpg0140, lpg0963, lpg2244	4	1	0	0	0	0	0	0	0	0	0	0	0	0	1	0	0	0	0	0		1	1	1	1	1	1	1	1	1	1	1	1	2	1	1	1	1	1		0.9176	0.379478	0.849979	0.921065	0.655136	0.406934	0.283286	0.61885	0.4884
lpg0059, lpg0140, lpg1621, lpg1959	4	2	0	0	0	0	0	0	0	0	0	1	0	0	0	0	0	0	0	1		1	1	1	1	1	1	1	1	1	2	1	1	1	1	1	1	1	2		0.9176	0.379478	0.849979	0.921065	0.655136	0.406934	0.283286	0.61885	0.4884
lpg0059, lpg0140, lpg1661	3	1	0	0	0	0	0	0	0	0	0	0	0	0	1	0	0	0	0	0		1	1	1	1	1	1	1	1	1	1	1	1	2	1	1	1	1	1		0.9176	0.379478	0.849979	0.921065	0.655136	0.406934	0.283286	0.61885	0.4884
lpg0059, lpg0140, lpg1689, lpg1701, lpg1959	5	2	1	0	0	0	0	0	0	0	0	0	0	0	0	1	0	0	0	0		2	1	1	1	1	1	1	1	1	1	1	1	1	2	1	1	1	1		1.8352	0.379478	0.849979	0.921065	0.655136	0.406934	0.283286	0.61885	0.4884
lpg0059, lpg0140, lpg1689, lpg1701, lpg1959, lpg2244	6	3	0	2	0	0	0	0	0	0	0	0	0	0	2	2	0	0	0	0		1	3	1	1	1	1	1	1	1	1	1	1	3	3	1	1	1	1		0.9176	1.13843	0.849979	0.921065	0.655136	0.406934	0.283286	0.61885	0.4884
lpg0059, lpg0140, lpg1689, lpg1701, lpg1959, lpg2244, lpg2884	7	8	5	6	0	4	4	0	0	0	0	0	4	3	14	20	0	0	0	0		6	7	1	5	5	1	1	1	1	1	5	4	15	21	1	1	1	1		5.5056	2.65634	0.849979	4.60532	3.27568	0.406934	0.283286	0.61885	0.4884
lpg0059, lpg0140, lpg1689, lpg1701, lpg1959, lpg2884	6	4	0	1	0	0	0	0	0	0	0	0	2	0	1	3	0	0	0	0		1	2	1	1	1	1	1	1	1	1	3	1	2	4	1	1	1	1		0.9176	0.758956	0.849979	0.921065	0.655136	0.406934	0.283286	0.61885	0.4884
lpg0059, lpg0140, lpg1689, lpg1701, lpg2244, lpg2884	6	1	0	0	0	0	0	0	0	0	0	0	1	0	0	0	0	0	0	0		1	1	1	1	1	1	1	1	1	1	2	1	1	1	1	1	1	1		0.9176	0.379478	0.849979	0.921065	0.655136	0.406934	0.283286	0.61885	0.4884
lpg0059, lpg0140, lpg1689, lpg1959, lpg2244, lpg2884	6	2	0	0	0	0	0	0	0	0	0	0	1	1	0	0	0	0	0	0		1	1	1	1	1	1	1	1	1	1	2	2	1	1	1	1	1	1		0.9176	0.379478	0.849979	0.921065	0.655136	0.406934	0.283286	0.61885	0.4884
lpg0059, lpg0140, lpg1701, lpg1959, lpg2244	5	1	0	0	0	0	0	0	0	0	0	0	0	0	1	0	0	0	0	0		1	1	1	1	1	1	1	1	1	1	1	1	2	1	1	1	1	1		0.9176	0.379478	0.849979	0.921065	0.655136	0.406934	0.283286	0.61885	0.4884
lpg0059, lpg0140, lpg1701, lpg1959, lpg2244, lpg2884	6	4	0	2	1	0	0	0	0	0	0	0	1	0	0	2	0	0	0	0		1	3	2	1	1	1	1	1	1	1	2	1	1	3	1	1	1	1		0.9176	1.13843	1.69996	0.921065	0.655136	0.406934	0.283286	0.61885	0.4884
lpg0059, lpg0140, lpg1701, lpg1959, lpg2884	5	1	0	0	0	0	0	0	0	0	0	0	0	1	0	0	0	0	0	0		1	1	1	1	1	1	1	1	1	1	1	2	1	1	1	1	1	1		0.9176	0.379478	0.849979	0.921065	0.655136	0.406934	0.283286	0.61885	0.4884
lpg0059, lpg0140, lpg1701, lpg2244, lpg2884	5	1	0	0	1	0	0	0	0	0	0	0	0	0	0	0	0	0	0	0		1	1	2	1	1	1	1	1	1	1	1	1	1	1	1	1	1	1		0.9176	0.379478	1.69996	0.921065	0.655136	0.406934	0.283286	0.61885	0.4884
lpg0059, lpg0140, lpg1776	3	8	1	24	11	5	3	0	0	0	0	0	0	4	2	8	0	0	0	0		2	25	12	6	4	1	1	1	1	1	1	5	3	9	1	1	1	1		1.8352	9.48695	10.1997	5.52639	2.62055	0.406934	0.283286	0.61885	0.4884
lpg0059, lpg0140, lpg1776, lpg2244	4	9	20	201	116	21	44	0	0	0	0	0	12	31	22	57	0	0	0	0		21	202	117	22	45	1	1	1	1	1	13	32	23	58	1	1	1	1		19.2696	76.6545	99.4475	20.2634	29.4811	0.406934	0.283286	0.61885	0.4884
lpg0059, lpg0140, lpg1776, lpg2244, lpg2552	5	1	0	0	1	0	0	0	0	0	0	0	0	0	0	0	0	0	0	0		1	1	2	1	1	1	1	1	1	1	1	1	1	1	1	1	1	1		0.9176	0.379478	1.69996	0.921065	0.655136	0.406934	0.283286	0.61885	0.4884
lpg0059, lpg0140, lpg1907	3	3	0	0	0	0	0	0	0	1	1	1	0	0	0	0	0	0	0	0		1	1	1	1	1	1	1	2	2	2	1	1	1	1	1	1	1	1		0.9176	0.379478	0.849979	0.921065	0.655136	0.406934	0.283286	1.2377	0.976801
lpg0059, lpg0140, lpg1907, lpg2271, lpg2733, lpg3000	6	1	0	0	0	0	0	0	0	1	0	0	0	0	0	0	0	0	0	0		1	1	1	1	1	1	1	2	1	1	1	1	1	1	1	1	1	1		0.9176	0.379478	0.849979	0.921065	0.655136	0.406934	0.283286	1.2377	0.4884
lpg0059, lpg0140, lpg1907, lpg2733	4	1	0	0	0	0	0	0	4	0	0	0	0	0	0	0	0	0	0	0		1	1	1	1	1	1	5	1	1	1	1	1	1	1	1	1	1	1		0.9176	0.379478	0.849979	0.921065	0.655136	0.406934	1.41643	0.61885	0.4884
lpg0059, lpg0140, lpg1907, lpg2733, lpg3000	5	7	0	0	0	0	0	1	4	3	2	3	0	0	0	0	2	2	0	0		1	1	1	1	1	2	5	4	3	4	1	1	1	1	3	3	1	1		0.9176	0.379478	0.849979	0.921065	0.655136	0.813868	1.41643	2.4754	1.4652
lpg0059, lpg0140, lpg1907, lpg3000	4	6	0	0	0	0	0	1	1	2	3	4	0	0	0	0	0	1	0	0		1	1	1	1	1	2	2	3	4	5	1	1	1	1	1	2	1	1		0.9176	0.379478	0.849979	0.921065	0.655136	0.813868	0.566572	1.85655	1.9536
lpg0059, lpg0140, lpg1959	3	1	0	0	0	0	0	0	0	0	0	0	0	0	0	0	0	1	0	0		1	1	1	1	1	1	1	1	1	1	1	1	1	1	1	2	1	1		0.9176	0.379478	0.849979	0.921065	0.655136	0.406934	0.283286	0.61885	0.4884
lpg0059, lpg0140, lpg2244	3	7	0	25	6	0	3	0	0	0	0	0	1	1	1	1	0	0	0	0		1	26	7	1	4	1	1	1	1	1	2	2	2	2	1	1	1	1		0.9176	9.86642	5.94985	0.921065	2.62055	0.406934	0.283286	0.61885	0.4884
lpg0059, lpg0140, lpg2733	3	1	0	0	0	0	0	0	1	0	0	0	0	0	0	0	0	0	0	0		1	1	1	1	1	1	2	1	1	1	1	1	1	1	1	1	1	1		0.9176	0.379478	0.849979	0.921065	0.655136	0.406934	0.566572	0.61885	0.4884
lpg0059, lpg0140, lpg2733, lpg3000	4	2	0	0	0	0	0	0	1	0	0	0	0	0	0	0	1	0	0	0		1	1	1	1	1	1	2	1	1	1	1	1	1	1	2	1	1	1		0.9176	0.379478	0.849979	0.921065	0.655136	0.406934	0.566572	0.61885	0.4884
lpg0059, lpg0140, lpg2885	3	8	1	5	8	0	1	0	0	0	0	0	1	4	2	4	0	0	0	0		2	6	9	1	2	1	1	1	1	1	2	5	3	5	1	1	1	1		1.8352	2.27687	7.64981	0.921065	1.31027	0.406934	0.283286	0.61885	0.4884
lpg0059, lpg0140, lpg3000	3	2	0	0	0	0	0	0	1	0	0	1	0	0	0	0	0	0	0	0		1	1	1	1	1	1	2	1	1	2	1	1	1	1	1	1	1	1		0.9176	0.379478	0.849979	0.921065	0.655136	0.406934	0.566572	0.61885	0.4884
lpg0059, lpg0171	2	2	0	0	0	0	0	1	0	0	0	1	0	0	0	0	0	0	0	0		1	1	1	1	1	2	1	1	1	2	1	1	1	1	1	1	1	1		0.9176	0.379478	0.849979	0.921065	0.655136	0.813868	0.283286	0.61885	0.4884
lpg0059, lpg0171, lpg0518, lpg1137, lpg1661, lpg2804, lpg2884	7	1	0	0	0	0	0	0	0	0	0	0	0	0	0	0	0	1	0	0		1	1	1	1	1	1	1	1	1	1	1	1	1	1	1	2	1	1		0.9176	0.379478	0.849979	0.921065	0.655136	0.406934	0.283286	0.61885	0.4884
lpg0059, lpg0171, lpg1907	3	2	0	0	0	0	0	0	1	0	0	1	0	0	0	0	0	0	0	0		1	1	1	1	1	1	2	1	1	2	1	1	1	1	1	1	1	1		0.9176	0.379478	0.849979	0.921065	0.655136	0.406934	0.566572	0.61885	0.4884
lpg0059, lpg0171, lpg1907, lpg2733	4	1	0	0	0	0	0	2	0	0	0	0	0	0	0	0	0	0	0	0		1	1	1	1	1	3	1	1	1	1	1	1	1	1	1	1	1	1		0.9176	0.379478	0.849979	0.921065	0.655136	1.2208	0.283286	0.61885	0.4884
lpg0059, lpg0171, lpg1907, lpg2733, lpg3000	5	6	0	0	0	0	0	0	8	1	3	2	0	0	0	0	0	1	1	0		1	1	1	1	1	1	9	2	4	3	1	1	1	1	1	2	2	1		0.9176	0.379478	0.849979	0.921065	0.655136	0.406934	2.54958	1.2377	1.9536
lpg0059, lpg0171, lpg1907, lpg3000	4	5	0	0	0	0	0	1	2	0	2	1	0	0	0	0	1	0	0	0		1	1	1	1	1	2	3	1	3	2	1	1	1	1	2	1	1	1		0.9176	0.379478	0.849979	0.921065	0.655136	0.813868	0.849858	0.61885	1.4652
lpg0059, lpg0171, lpg2733, lpg3000	4	3	0	0	0	0	0	1	0	0	0	2	0	0	0	0	0	0	1	0		1	1	1	1	1	2	1	1	1	3	1	1	1	1	1	1	2	1		0.9176	0.379478	0.849979	0.921065	0.655136	0.813868	0.283286	0.61885	0.4884
lpg0059, lpg0171, lpg3000	3	1	0	0	0	0	0	0	1	0	0	0	0	0	0	0	0	0	0	0		1	1	1	1	1	1	2	1	1	1	1	1	1	1	1	1	1	1		0.9176	0.379478	0.849979	0.921065	0.655136	0.406934	0.566572	0.61885	0.4884
lpg0059, lpg0246	2	11	19	54	22	32	9	0	0	0	0	0	79	54	37	32	32	0	24	0		20	55	23	33	10	1	1	1	1	1	80	55	38	33	33	1	25	1		18.352	20.8713	19.5495	30.3951	6.55136	0.406934	0.283286	0.61885	0.4884
lpg0059, lpg0246, lpg0439	3	9	48	52	24	67	5	0	0	0	0	0	139	211	63	128	0	0	0	0		49	53	25	68	6	1	1	1	1	1	140	212	64	129	1	1	1	1		44.9624	20.1123	21.2495	62.6324	3.93082	0.406934	0.283286	0.61885	0.4884
lpg0059, lpg0246, lpg0439, lpg0518, lpg2884	5	1	0	0	0	0	0	0	0	0	0	0	0	0	0	1	0	0	0	0		1	1	1	1	1	1	1	1	1	1	1	1	1	2	1	1	1	1		0.9176	0.379478	0.849979	0.921065	0.655136	0.406934	0.283286	0.61885	0.4884
lpg0059, lpg0246, lpg0439, lpg0621, lpg1661, lpg2804	6	1	0	0	0	0	0	0	0	0	0	0	0	1	0	0	0	0	0	0		1	1	1	1	1	1	1	1	1	1	1	2	1	1	1	1	1	1		0.9176	0.379478	0.849979	0.921065	0.655136	0.406934	0.283286	0.61885	0.4884
lpg0059, lpg0246, lpg0439, lpg0963, lpg1661, lpg2223, lpg2552, lpg2888, lpg3000	9	2	0	0	0	0	0	0	0	0	0	0	0	0	1	1	0	0	0	0		1	1	1	1	1	1	1	1	1	1	1	1	2	2	1	1	1	1		0.9176	0.379478	0.849979	0.921065	0.655136	0.406934	0.283286	0.61885	0.4884
lpg0059, lpg0246, lpg0439, lpg0963, lpg2223, lpg2552, lpg2888, lpg3000	8	1	0	0	0	0	0	0	0	0	0	0	1	0	0	0	0	0	0	0		1	1	1	1	1	1	1	1	1	1	2	1	1	1	1	1	1	1		0.9176	0.379478	0.849979	0.921065	0.655136	0.406934	0.283286	0.61885	0.4884
lpg0059, lpg0246, lpg0439, lpg0963, lpg2552	5	1	1	0	0	0	0	0	0	0	0	0	0	0	0	0	0	0	0	0		2	1	1	1	1	1	1	1	1	1	1	1	1	1	1	1	1	1		1.8352	0.379478	0.849979	0.921065	0.655136	0.406934	0.283286	0.61885	0.4884
lpg0059, lpg0246, lpg0439, lpg1525, lpg1907, lpg2584	6	1	0	0	0	0	0	0	0	0	0	0	0	0	0	1	0	0	0	0		1	1	1	1	1	1	1	1	1	1	1	1	1	2	1	1	1	1		0.9176	0.379478	0.849979	0.921065	0.655136	0.406934	0.283286	0.61885	0.4884
lpg0059, lpg0246, lpg0439, lpg1661	4	11	259	179	58	527	25	0	0	0	0	0	745	1213	430	706	1	0	2	0		260	180	59	528	26	1	1	1	1	1	746	1214	431	707	2	1	3	1		238.576	68.306	50.1487	486.322	17.0335	0.406934	0.283286	0.61885	0.4884
lpg0059, lpg0246, lpg0439, lpg1661, lpg2223, lpg2815	6	1	0	0	0	0	0	0	0	0	0	0	0	0	0	1	0	0	0	0		1	1	1	1	1	1	1	1	1	1	1	1	1	2	1	1	1	1		0.9176	0.379478	0.849979	0.921065	0.655136	0.406934	0.283286	0.61885	0.4884
lpg0059, lpg0246, lpg0439, lpg1661, lpg2552, lpg2692	6	1	0	0	0	0	0	0	0	0	0	0	0	0	1	0	0	0	0	0		1	1	1	1	1	1	1	1	1	1	1	1	2	1	1	1	1	1		0.9176	0.379478	0.849979	0.921065	0.655136	0.406934	0.283286	0.61885	0.4884
lpg0059, lpg0246, lpg0439, lpg1661, lpg2888, lpg3000	6	2	0	0	0	1	0	0	0	0	0	0	0	0	1	0	0	0	0	0		1	1	1	2	1	1	1	1	1	1	1	1	2	1	1	1	1	1		0.9176	0.379478	0.849979	1.84213	0.655136	0.406934	0.283286	0.61885	0.4884
lpg0059, lpg0246, lpg0439, lpg2552	4	1	0	0	1	0	0	0	0	0	0	0	0	0	0	0	0	0	0	0		1	1	2	1	1	1	1	1	1	1	1	1	1	1	1	1	1	1		0.9176	0.379478	1.69996	0.921065	0.655136	0.406934	0.283286	0.61885	0.4884
lpg0059, lpg0246, lpg0439, lpg2692	4	1	0	0	0	0	0	0	0	0	0	0	0	0	0	1	0	0	0	0		1	1	1	1	1	1	1	1	1	1	1	1	1	2	1	1	1	1		0.9176	0.379478	0.849979	0.921065	0.655136	0.406934	0.283286	0.61885	0.4884
lpg0059, lpg0246, lpg1661	3	9	22	25	13	58	4	0	0	0	0	0	110	133	54	99	0	0	0	0		23	26	14	59	5	1	1	1	1	1	111	134	55	100	1	1	1	1		21.1048	9.86642	11.8997	54.3428	3.27568	0.406934	0.283286	0.61885	0.4884
lpg0059, lpg0246, lpg1661, lpg1689, lpg2806, lpg2874	6	1	0	0	0	0	0	0	0	0	0	0	0	0	0	1	0	0	0	0		1	1	1	1	1	1	1	1	1	1	1	1	1	2	1	1	1	1		0.9176	0.379478	0.849979	0.921065	0.655136	0.406934	0.283286	0.61885	0.4884
lpg0059, lpg0404, lpg0518, lpg0621	4	1	0	0	0	0	0	0	0	0	0	0	0	0	0	1	0	0	0	0		1	1	1	1	1	1	1	1	1	1	1	1	1	2	1	1	1	1		0.9176	0.379478	0.849979	0.921065	0.655136	0.406934	0.283286	0.61885	0.4884
lpg0059, lpg0404, lpg1525, lpg1661, lpg1701, lpg2804	6	1	0	0	0	0	0	0	0	0	0	0	0	0	0	0	1	0	0	0		1	1	1	1	1	1	1	1	1	1	1	1	1	1	2	1	1	1		0.9176	0.379478	0.849979	0.921065	0.655136	0.406934	0.283286	0.61885	0.4884
lpg0059, lpg0404, lpg1661, lpg2804, lpg2885	5	1	0	0	0	0	0	0	0	0	0	0	0	0	0	0	0	1	0	0		1	1	1	1	1	1	1	1	1	1	1	1	1	1	1	2	1	1		0.9176	0.379478	0.849979	0.921065	0.655136	0.406934	0.283286	0.61885	0.4884
lpg0059, lpg0404, lpg1907, lpg2584, lpg2815, lpg2884	6	1	0	0	0	0	0	0	0	0	0	0	0	0	0	0	0	1	0	0		1	1	1	1	1	1	1	1	1	1	1	1	1	1	1	2	1	1		0.9176	0.379478	0.849979	0.921065	0.655136	0.406934	0.283286	0.61885	0.4884
lpg0059, lpg0404, lpg2584, lpg2806, lpg2884, lpg2885	6	1	0	0	0	0	0	0	0	1	0	0	0	0	0	0	0	0	0	0		1	1	1	1	1	1	1	2	1	1	1	1	1	1	1	1	1	1		0.9176	0.379478	0.849979	0.921065	0.655136	0.406934	0.283286	1.2377	0.4884
lpg0059, lpg0439	2	11	381	2231	1036	306	1437	0	0	0	0	0	490	1471	452	805	4	0	1	0		382	2232	1037	307	1438	1	1	1	1	1	491	1472	453	806	5	1	2	1		350.523	846.995	881.428	282.767	942.086	0.406934	0.283286	0.61885	0.4884
lpg0059, lpg0439, lpg0518, lpg0963, lpg1527, lpg1701, lpg2223, lpg2552, lpg3000	9	1	0	0	0	0	0	0	0	0	0	0	0	0	0	0	0	0	1	0		1	1	1	1	1	1	1	1	1	1	1	1	1	1	1	1	2	1		0.9176	0.379478	0.849979	0.921065	0.655136	0.406934	0.283286	0.61885	0.4884
lpg0059, lpg0439, lpg0621, lpg1959, lpg2884	5	1	0	0	0	0	0	0	0	0	0	0	0	0	0	1	0	0	0	0		1	1	1	1	1	1	1	1	1	1	1	1	1	2	1	1	1	1		0.9176	0.379478	0.849979	0.921065	0.655136	0.406934	0.283286	0.61885	0.4884
lpg0059, lpg0439, lpg0963, lpg2223, lpg2552, lpg2888, lpg3000	7	1	0	0	0	0	0	0	0	0	0	0	0	0	3	0	0	0	0	0		1	1	1	1	1	1	1	1	1	1	1	1	4	1	1	1	1	1		0.9176	0.379478	0.849979	0.921065	0.655136	0.406934	0.283286	0.61885	0.4884
lpg0059, lpg0439, lpg0963, lpg2552	4	2	0	0	2	0	0	0	0	0	0	0	1	0	0	0	0	0	0	0		1	1	3	1	1	1	1	1	1	1	2	1	1	1	1	1	1	1		0.9176	0.379478	2.54994	0.921065	0.655136	0.406934	0.283286	0.61885	0.4884
lpg0059, lpg0439, lpg1099, lpg2584	4	1	0	0	0	0	0	0	0	0	0	0	0	1	0	0	0	0	0	0		1	1	1	1	1	1	1	1	1	1	1	2	1	1	1	1	1	1		0.9176	0.379478	0.849979	0.921065	0.655136	0.406934	0.283286	0.61885	0.4884
lpg0059, lpg0439, lpg1525	3	1	0	0	1	0	0	0	0	0	0	0	0	0	0	0	0	0	0	0		1	1	2	1	1	1	1	1	1	1	1	1	1	1	1	1	1	1		0.9176	0.379478	1.69996	0.921065	0.655136	0.406934	0.283286	0.61885	0.4884
lpg0059, lpg0439, lpg1661	3	9	19	15	9	26	1	0	0	0	0	0	66	71	39	47	0	0	0	0		20	16	10	27	2	1	1	1	1	1	67	72	40	48	1	1	1	1		18.352	6.07165	8.49979	24.8687	1.31027	0.406934	0.283286	0.61885	0.4884
lpg0059, lpg0439, lpg2223	3	4	1	0	0	0	0	0	1	0	0	0	0	0	0	0	0	2	0	1		2	1	1	1	1	1	2	1	1	1	1	1	1	1	1	3	1	2		1.8352	0.379478	0.849979	0.921065	0.655136	0.406934	0.566572	0.61885	0.4884
lpg0059, lpg0439, lpg2552, lpg2692	4	3	0	0	0	0	1	0	0	0	0	0	0	1	1	0	0	0	0	0		1	1	1	1	2	1	1	1	1	1	1	2	2	1	1	1	1	1		0.9176	0.379478	0.849979	0.921065	1.31027	0.406934	0.283286	0.61885	0.4884
lpg0059, lpg0439, lpg2884	3	1	0	0	0	0	0	0	0	0	0	0	0	0	0	1	0	0	0	0		1	1	1	1	1	1	1	1	1	1	1	1	1	2	1	1	1	1		0.9176	0.379478	0.849979	0.921065	0.655136	0.406934	0.283286	0.61885	0.4884
lpg0059, lpg0518	2	12	0	0	0	1	0	23	86	29	16	21	0	2	1	0	12	46	8	34		1	1	1	2	1	24	87	30	17	22	1	3	2	1	13	47	9	35		0.9176	0.379478	0.849979	1.84213	0.655136	9.76642	24.6459	18.5655	8.30281
lpg0059, lpg0518, lpg1525, lpg2223, lpg2552, lpg3000	6	1	0	0	0	0	0	0	1	0	0	0	0	0	0	0	0	0	0	0		1	1	1	1	1	1	2	1	1	1	1	1	1	1	1	1	1	1		0.9176	0.379478	0.849979	0.921065	0.655136	0.406934	0.566572	0.61885	0.4884
lpg0059, lpg0518, lpg1621, lpg1701, lpg1959, lpg2552, lpg2885, lpg2888, lpg3000	9	1	0	0	0	0	0	0	0	0	0	0	0	0	0	0	0	1	0	0		1	1	1	1	1	1	1	1	1	1	1	1	1	1	1	2	1	1		0.9176	0.379478	0.849979	0.921065	0.655136	0.406934	0.283286	0.61885	0.4884
lpg0059, lpg0518, lpg1661	3	6	1	1	2	0	0	0	0	0	0	0	2	0	1	2	0	0	0	0		2	2	3	1	1	1	1	1	1	1	3	1	2	3	1	1	1	1		1.8352	0.758956	2.54994	0.921065	0.655136	0.406934	0.283286	0.61885	0.4884
lpg0059, lpg0518, lpg1661, lpg2552, lpg2874	5	1	0	0	0	0	0	0	0	0	0	0	0	0	0	1	0	0	0	0		1	1	1	1	1	1	1	1	1	1	1	1	1	2	1	1	1	1		0.9176	0.379478	0.849979	0.921065	0.655136	0.406934	0.283286	0.61885	0.4884
lpg0059, lpg0518, lpg1661, lpg2874	4	10	5	14	8	5	6	0	0	0	0	0	6	16	9	27	0	0	1	0		6	15	9	6	7	1	1	1	1	1	7	17	10	28	1	1	2	1		5.5056	5.69217	7.64981	5.52639	4.58595	0.406934	0.283286	0.61885	0.4884
lpg0059, lpg0518, lpg2223, lpg2244, lpg2552, lpg3000	6	1	0	0	0	0	0	0	0	0	0	0	0	0	0	0	0	0	1	0		1	1	1	1	1	1	1	1	1	1	1	1	1	1	1	1	2	1		0.9176	0.379478	0.849979	0.921065	0.655136	0.406934	0.283286	0.61885	0.4884
lpg0059, lpg0518, lpg2552	3	9	0	0	0	0	0	6	19	8	7	16	0	0	0	0	2	19	3	8		1	1	1	1	1	7	20	9	8	17	1	1	1	1	3	20	4	9		0.9176	0.379478	0.849979	0.921065	0.655136	2.84854	5.66572	5.56965	3.9072
lpg0059, lpg0518, lpg2552, lpg2692, lpg2874	5	1	0	0	0	0	0	0	0	0	0	0	0	0	0	1	0	0	0	0		1	1	1	1	1	1	1	1	1	1	1	1	1	2	1	1	1	1		0.9176	0.379478	0.849979	0.921065	0.655136	0.406934	0.283286	0.61885	0.4884
lpg0059, lpg0518, lpg2552, lpg3000	4	10	0	0	0	0	0	59	158	94	60	103	0	0	1	0	28	111	30	65		1	1	1	1	1	60	159	95	61	104	1	1	2	1	29	112	31	66		0.9176	0.379478	0.849979	0.921065	0.655136	24.416	45.0425	58.7908	29.7924
lpg0059, lpg0518, lpg2874	3	9	2	2	1	1	1	0	0	0	0	0	2	3	2	4	0	0	0	0		3	3	2	2	2	1	1	1	1	1	3	4	3	5	1	1	1	1		2.7528	1.13843	1.69996	1.84213	1.31027	0.406934	0.283286	0.61885	0.4884
lpg0059, lpg0518, lpg3000	3	9	0	0	0	0	0	7	18	9	7	10	0	0	0	0	3	14	1	8		1	1	1	1	1	8	19	10	8	11	1	1	1	1	4	15	2	9		0.9176	0.379478	0.849979	0.921065	0.655136	3.25547	5.38244	6.1885	3.9072
lpg0059, lpg0621	2	7	1	7	1	0	0	0	0	0	0	0	1	3	1	4	0	0	0	0		2	8	2	1	1	1	1	1	1	1	2	4	2	5	1	1	1	1		1.8352	3.03582	1.69996	0.921065	0.655136	0.406934	0.283286	0.61885	0.4884
lpg0059, lpg0621, lpg1907	3	3	0	0	0	0	0	0	0	1	0	0	0	0	0	0	0	1	0	1		1	1	1	1	1	1	1	2	1	1	1	1	1	1	1	2	1	2		0.9176	0.379478	0.849979	0.921065	0.655136	0.406934	0.283286	1.2377	0.4884
lpg0059, lpg0621, lpg2223	3	9	10	52	15	15	18	0	0	0	0	0	8	27	14	47	0	0	0	0		11	53	16	16	19	1	1	1	1	1	9	28	15	48	1	1	1	1		10.0936	20.1123	13.5997	14.737	12.4476	0.406934	0.283286	0.61885	0.4884
lpg0059, lpg0716	2	9	0	0	0	0	0	4	8	1	1	5	0	0	0	0	1	7	2	6		1	1	1	1	1	5	9	2	2	6	1	1	1	1	2	8	3	7		0.9176	0.379478	0.849979	0.921065	0.655136	2.03467	2.54958	1.2377	0.976801
lpg0059, lpg0716, lpg2223	3	10	0	0	0	0	0	21	77	36	17	44	0	0	1	0	22	70	11	29		1	1	1	1	1	22	78	37	18	45	1	1	2	1	23	71	12	30		0.9176	0.379478	0.849979	0.921065	0.655136	8.95255	22.0963	22.8975	8.79121
lpg0059, lpg0879, lpg0963	3	1	0	0	0	0	0	0	0	0	0	0	0	0	0	0	1	0	0	0		1	1	1	1	1	1	1	1	1	1	1	1	1	1	2	1	1	1		0.9176	0.379478	0.849979	0.921065	0.655136	0.406934	0.283286	0.61885	0.4884
lpg0059, lpg0963	2	10	102	204	81	455	20	0	0	0	0	0	514	60	665	125	0	0	4	0		103	205	82	456	21	1	1	1	1	1	515	61	666	126	1	1	5	1		94.5128	77.793	69.6983	420.006	13.7579	0.406934	0.283286	0.61885	0.4884
lpg0059, lpg0963, lpg1137	3	9	5	14	12	9	14	0	0	0	0	0	7	32	14	34	0	0	0	0		6	15	13	10	15	1	1	1	1	1	8	33	15	35	1	1	1	1		5.5056	5.69217	11.0497	9.21065	9.82704	0.406934	0.283286	0.61885	0.4884
lpg0059, lpg0963, lpg1137, lpg1689	4	2	0	0	0	0	0	0	0	0	0	0	1	0	1	0	0	0	0	0		1	1	1	1	1	1	1	1	1	1	2	1	2	1	1	1	1	1		0.9176	0.379478	0.849979	0.921065	0.655136	0.406934	0.283286	0.61885	0.4884
lpg0059, lpg0963, lpg1137, lpg1689, lpg2692	5	2	0	0	0	0	0	0	0	0	0	0	2	0	7	0	0	0	0	0		1	1	1	1	1	1	1	1	1	1	3	1	8	1	1	1	1	1		0.9176	0.379478	0.849979	0.921065	0.655136	0.406934	0.283286	0.61885	0.4884
lpg0059, lpg0963, lpg1137, lpg2244, lpg2552	5	1	0	0	0	0	0	0	0	0	0	0	0	0	1	0	0	0	0	0		1	1	1	1	1	1	1	1	1	1	1	1	2	1	1	1	1	1		0.9176	0.379478	0.849979	0.921065	0.655136	0.406934	0.283286	0.61885	0.4884
lpg0059, lpg0963, lpg1137, lpg2884	4	1	0	0	0	0	0	0	0	0	0	0	0	0	0	1	0	0	0	0		1	1	1	1	1	1	1	1	1	1	1	1	1	2	1	1	1	1		0.9176	0.379478	0.849979	0.921065	0.655136	0.406934	0.283286	0.61885	0.4884
lpg0059, lpg0963, lpg1689, lpg2692	4	1	0	0	0	0	0	0	0	0	0	0	1	0	0	0	0	0	0	0		1	1	1	1	1	1	1	1	1	1	2	1	1	1	1	1	1	1		0.9176	0.379478	0.849979	0.921065	0.655136	0.406934	0.283286	0.61885	0.4884
lpg0059, lpg0963, lpg2223, lpg2552, lpg2888, lpg3000	6	1	0	0	0	0	0	0	0	0	0	0	0	0	0	1	0	0	0	0		1	1	1	1	1	1	1	1	1	1	1	1	1	2	1	1	1	1		0.9176	0.379478	0.849979	0.921065	0.655136	0.406934	0.283286	0.61885	0.4884
lpg0059, lpg0963, lpg2552	3	3	0	0	1	0	0	0	0	0	0	0	0	0	1	1	0	0	0	0		1	1	2	1	1	1	1	1	1	1	1	1	2	2	1	1	1	1		0.9176	0.379478	1.69996	0.921065	0.655136	0.406934	0.283286	0.61885	0.4884
lpg0059, lpg0963, lpg2888	3	1	0	0	0	0	0	0	0	0	0	0	0	0	1	0	0	0	0	0		1	1	1	1	1	1	1	1	1	1	1	1	2	1	1	1	1	1		0.9176	0.379478	0.849979	0.921065	0.655136	0.406934	0.283286	0.61885	0.4884
lpg0059, lpg1099, lpg1907	3	1	0	0	0	0	0	1	0	0	0	0	0	0	0	0	0	0	0	0		1	1	1	1	1	2	1	1	1	1	1	1	1	1	1	1	1	1		0.9176	0.379478	0.849979	0.921065	0.655136	0.813868	0.283286	0.61885	0.4884
lpg0059, lpg1099, lpg1907, lpg2584, lpg2815	5	1	0	0	0	0	0	1	0	0	0	0	0	0	0	0	0	0	0	0		1	1	1	1	1	2	1	1	1	1	1	1	1	1	1	1	1	1		0.9176	0.379478	0.849979	0.921065	0.655136	0.813868	0.283286	0.61885	0.4884
lpg0059, lpg1099, lpg1907, lpg2584, lpg2815, lpg2884	6	5	0	0	0	0	0	4	0	0	0	1	0	0	0	0	1	3	5	0		1	1	1	1	1	5	1	1	1	2	1	1	1	1	2	4	6	1		0.9176	0.379478	0.849979	0.921065	0.655136	2.03467	0.283286	0.61885	0.4884
lpg0059, lpg1099, lpg1907, lpg2584, lpg2884	5	3	0	0	0	0	0	0	0	0	0	0	0	0	0	0	1	1	1	0		1	1	1	1	1	1	1	1	1	1	1	1	1	1	2	2	2	1		0.9176	0.379478	0.849979	0.921065	0.655136	0.406934	0.283286	0.61885	0.4884
lpg0059, lpg1099, lpg1907, lpg2815, lpg2884	5	2	0	0	0	0	0	0	0	0	0	0	0	0	0	0	1	0	1	0		1	1	1	1	1	1	1	1	1	1	1	1	1	1	2	1	2	1		0.9176	0.379478	0.849979	0.921065	0.655136	0.406934	0.283286	0.61885	0.4884
lpg0059, lpg1099, lpg2271, lpg2584	4	1	0	0	0	0	1	0	0	0	0	0	0	0	0	0	0	0	0	0		1	1	1	1	2	1	1	1	1	1	1	1	1	1	1	1	1	1		0.9176	0.379478	0.849979	0.921065	1.31027	0.406934	0.283286	0.61885	0.4884
lpg0059, lpg1099, lpg2584, lpg2815, lpg2884	5	1	0	0	0	0	0	2	0	0	0	0	0	0	0	0	0	0	0	0		1	1	1	1	1	3	1	1	1	1	1	1	1	1	1	1	1	1		0.9176	0.379478	0.849979	0.921065	0.655136	1.2208	0.283286	0.61885	0.4884
lpg0059, lpg1099, lpg2584, lpg2884	4	2	0	0	0	0	0	0	0	0	0	0	0	0	0	0	1	0	0	2		1	1	1	1	1	1	1	1	1	1	1	1	1	1	2	1	1	3		0.9176	0.379478	0.849979	0.921065	0.655136	0.406934	0.283286	0.61885	0.4884
lpg0059, lpg1099, lpg2815	3	1	0	0	0	0	0	0	0	0	0	0	0	0	0	0	1	0	0	0		1	1	1	1	1	1	1	1	1	1	1	1	1	1	2	1	1	1		0.9176	0.379478	0.849979	0.921065	0.655136	0.406934	0.283286	0.61885	0.4884
lpg0059, lpg1137	2	7	0	0	1	1	5	0	0	0	0	0	3	5	1	4	0	0	0	0		1	1	2	2	6	1	1	1	1	1	4	6	2	5	1	1	1	1		0.9176	0.379478	1.69996	1.84213	3.93082	0.406934	0.283286	0.61885	0.4884
lpg0059, lpg1525	2	8	1	5	1	2	2	0	0	0	0	0	0	5	1	6	0	0	0	0		2	6	2	3	3	1	1	1	1	1	1	6	2	7	1	1	1	1		1.8352	2.27687	1.69996	2.76319	1.96541	0.406934	0.283286	0.61885	0.4884
lpg0059, lpg1525, lpg2552, lpg2692	4	1	0	0	0	0	0	0	0	0	0	0	0	0	0	1	0	0	0	0		1	1	1	1	1	1	1	1	1	1	1	1	1	2	1	1	1	1		0.9176	0.379478	0.849979	0.921065	0.655136	0.406934	0.283286	0.61885	0.4884
lpg0059, lpg1525, lpg2692	3	8	3	12	2	1	5	0	0	0	0	0	0	5	5	11	0	0	0	0		4	13	3	2	6	1	1	1	1	1	1	6	6	12	1	1	1	1		3.6704	4.93321	2.54994	1.84213	3.93082	0.406934	0.283286	0.61885	0.4884
lpg0059, lpg1525, lpg2806	3	1	0	0	0	0	0	0	0	0	0	0	0	0	0	0	0	0	0	1		1	1	1	1	1	1	1	1	1	1	1	1	1	1	1	1	1	2		0.9176	0.379478	0.849979	0.921065	0.655136	0.406934	0.283286	0.61885	0.4884
lpg0059, lpg1527	2	2	0	0	0	1	0	0	0	0	0	0	0	0	0	3	0	0	0	0		1	1	1	2	1	1	1	1	1	1	1	1	1	4	1	1	1	1		0.9176	0.379478	0.849979	1.84213	0.655136	0.406934	0.283286	0.61885	0.4884
lpg0059, lpg1527, lpg1621, lpg2271, lpg2885	5	1	0	0	0	0	0	0	0	0	0	0	0	0	0	1	0	0	0	0		1	1	1	1	1	1	1	1	1	1	1	1	1	2	1	1	1	1		0.9176	0.379478	0.849979	0.921065	0.655136	0.406934	0.283286	0.61885	0.4884
lpg0059, lpg1527, lpg1661, lpg2804	4	1	0	0	0	0	0	0	0	0	0	0	0	0	0	0	1	0	0	0		1	1	1	1	1	1	1	1	1	1	1	1	1	1	2	1	1	1		0.9176	0.379478	0.849979	0.921065	0.655136	0.406934	0.283286	0.61885	0.4884
lpg0059, lpg1527, lpg2223, lpg2244, lpg2552, lpg2874, lpg2885, lpg2888, lpg3000	9	1	0	0	0	0	0	0	0	0	0	0	0	0	0	1	0	0	0	0		1	1	1	1	1	1	1	1	1	1	1	1	1	2	1	1	1	1		0.9176	0.379478	0.849979	0.921065	0.655136	0.406934	0.283286	0.61885	0.4884
lpg0059, lpg1527, lpg2244	3	2	0	0	0	0	0	0	0	0	0	0	0	0	1	1	0	0	0	0		1	1	1	1	1	1	1	1	1	1	1	1	2	2	1	1	1	1		0.9176	0.379478	0.849979	0.921065	0.655136	0.406934	0.283286	0.61885	0.4884
lpg0059, lpg1527, lpg2244, lpg2874	4	7	1	0	1	3	0	0	0	0	0	0	1	4	4	9	0	0	0	0		2	1	2	4	1	1	1	1	1	1	2	5	5	10	1	1	1	1		1.8352	0.379478	1.69996	3.68426	0.655136	0.406934	0.283286	0.61885	0.4884
lpg0059, lpg1527, lpg2244, lpg2874, lpg2885	5	9	12	9	4	22	3	0	0	0	0	0	15	25	24	95	0	0	0	0		13	10	5	23	4	1	1	1	1	1	16	26	25	96	1	1	1	1		11.9288	3.79478	4.24989	21.1845	2.62055	0.406934	0.283286	0.61885	0.4884
lpg0059, lpg1527, lpg2244, lpg2885	4	6	0	0	2	5	0	0	0	0	0	0	2	1	2	5	0	0	0	0		1	1	3	6	1	1	1	1	1	1	3	2	3	6	1	1	1	1		0.9176	0.379478	2.54994	5.52639	0.655136	0.406934	0.283286	0.61885	0.4884
lpg0059, lpg1527, lpg2271, lpg2885	4	1	0	0	0	0	0	0	0	0	0	0	0	0	0	1	0	0	0	0		1	1	1	1	1	1	1	1	1	1	1	1	1	2	1	1	1	1		0.9176	0.379478	0.849979	0.921065	0.655136	0.406934	0.283286	0.61885	0.4884
lpg0059, lpg1527, lpg2874	3	3	0	0	0	1	0	0	0	0	0	0	0	0	1	4	0	0	0	0		1	1	1	2	1	1	1	1	1	1	1	1	2	5	1	1	1	1		0.9176	0.379478	0.849979	1.84213	0.655136	0.406934	0.283286	0.61885	0.4884
lpg0059, lpg1527, lpg2874, lpg2885	4	5	0	0	0	2	0	0	0	0	0	0	2	1	2	5	0	0	0	0		1	1	1	3	1	1	1	1	1	1	3	2	3	6	1	1	1	1		0.9176	0.379478	0.849979	2.76319	0.655136	0.406934	0.283286	0.61885	0.4884
lpg0059, lpg1527, lpg2885	3	3	0	1	0	2	0	0	0	0	0	0	0	0	0	1	0	0	0	0		1	2	1	3	1	1	1	1	1	1	1	1	1	2	1	1	1	1		0.9176	0.758956	0.849979	2.76319	0.655136	0.406934	0.283286	0.61885	0.4884
lpg0059, lpg1621	2	15	0	5	1	0	1	7	21	11	4	11	0	2	2	1	2	9	1	4		1	6	2	1	2	8	22	12	5	12	1	3	3	2	3	10	2	5		0.9176	2.27687	1.69996	0.921065	1.31027	3.25547	6.23229	7.4262	2.442
lpg0059, lpg1621, lpg1701	3	1	0	0	0	0	0	0	0	0	0	1	0	0	0	0	0	0	0	0		1	1	1	1	1	1	1	1	1	2	1	1	1	1	1	1	1	1		0.9176	0.379478	0.849979	0.921065	0.655136	0.406934	0.283286	0.61885	0.4884
lpg0059, lpg1621, lpg1701, lpg1907	4	2	0	0	0	0	0	0	1	0	0	1	0	0	0	0	0	0	0	0		1	1	1	1	1	1	2	1	1	2	1	1	1	1	1	1	1	1		0.9176	0.379478	0.849979	0.921065	0.655136	0.406934	0.566572	0.61885	0.4884
lpg0059, lpg1621, lpg1701, lpg1907, lpg3000	5	9	0	0	0	0	0	2	27	9	7	12	0	0	0	0	7	13	2	5		1	1	1	1	1	3	28	10	8	13	1	1	1	1	8	14	3	6		0.9176	0.379478	0.849979	0.921065	0.655136	1.2208	7.93201	6.1885	3.9072
lpg0059, lpg1621, lpg1701, lpg3000	4	5	0	0	0	0	0	1	2	0	1	3	0	0	0	0	0	1	0	0		1	1	1	1	1	2	3	1	2	4	1	1	1	1	1	2	1	1		0.9176	0.379478	0.849979	0.921065	0.655136	0.813868	0.849858	0.61885	0.976801
lpg0059, lpg1621, lpg1702	3	1	0	0	0	0	0	1	0	0	0	0	0	0	0	0	0	0	0	0		1	1	1	1	1	2	1	1	1	1	1	1	1	1	1	1	1	1		0.9176	0.379478	0.849979	0.921065	0.655136	0.813868	0.283286	0.61885	0.4884
lpg0059, lpg1621, lpg1702, lpg1907	4	3	0	0	0	0	0	3	0	0	0	0	0	0	0	0	1	2	0	0		1	1	1	1	1	4	1	1	1	1	1	1	1	1	2	3	1	1		0.9176	0.379478	0.849979	0.921065	0.655136	1.62774	0.283286	0.61885	0.4884
lpg0059, lpg1621, lpg1702, lpg1907, lpg1959	5	7	0	0	0	0	0	8	0	0	11	0	0	0	1	0	10	11	9	6		1	1	1	1	1	9	1	1	12	1	1	1	2	1	11	12	10	7		0.9176	0.379478	0.849979	0.921065	0.655136	3.66241	0.283286	0.61885	5.86081
lpg0059, lpg1621, lpg1702, lpg1907, lpg1959, lpg2815	6	7	0	0	0	0	0	43	1	0	33	0	0	0	0	0	24	51	25	38		1	1	1	1	1	44	2	1	34	1	1	1	1	1	25	52	26	39		0.9176	0.379478	0.849979	0.921065	0.655136	17.9051	0.566572	0.61885	16.6056
lpg0059, lpg1621, lpg1702, lpg1907, lpg2815	5	6	0	0	0	0	0	4	0	0	6	0	0	0	0	0	3	5	2	5		1	1	1	1	1	5	1	1	7	1	1	1	1	1	4	6	3	6		0.9176	0.379478	0.849979	0.921065	0.655136	2.03467	0.283286	0.61885	3.4188
lpg0059, lpg1621, lpg1702, lpg1959	4	5	0	0	0	0	0	2	0	0	1	0	0	0	0	0	1	3	0	1		1	1	1	1	1	3	1	1	2	1	1	1	1	1	2	4	1	2		0.9176	0.379478	0.849979	0.921065	0.655136	1.2208	0.283286	0.61885	0.976801
lpg0059, lpg1621, lpg1702, lpg1959, lpg2815	5	6	0	0	0	0	0	4	0	0	4	0	0	0	0	0	1	5	4	2		1	1	1	1	1	5	1	1	5	1	1	1	1	1	2	6	5	3		0.9176	0.379478	0.849979	0.921065	0.655136	2.03467	0.283286	0.61885	2.442
lpg0059, lpg1621, lpg1702, lpg2815	4	3	0	0	0	0	0	0	0	0	1	0	0	0	0	0	1	0	0	2		1	1	1	1	1	1	1	1	2	1	1	1	1	1	2	1	1	3		0.9176	0.379478	0.849979	0.921065	0.655136	0.406934	0.283286	0.61885	0.976801
lpg0059, lpg1621, lpg1907	3	12	6	22	12	6	15	0	2	0	0	1	4	34	11	31	0	1	0	0		7	23	13	7	16	1	3	1	1	2	5	35	12	32	1	2	1	1		6.4232	8.72799	11.0497	6.44745	10.4822	0.406934	0.849858	0.61885	0.4884
lpg0059, lpg1621, lpg1907, lpg1959	4	2	0	0	0	0	0	2	0	0	0	0	0	0	0	0	0	0	0	1		1	1	1	1	1	3	1	1	1	1	1	1	1	1	1	1	1	2		0.9176	0.379478	0.849979	0.921065	0.655136	1.2208	0.283286	0.61885	0.4884
lpg0059, lpg1621, lpg1907, lpg1959, lpg2815	5	5	0	0	0	0	0	2	0	0	0	0	0	0	0	0	2	5	2	3		1	1	1	1	1	3	1	1	1	1	1	1	1	1	3	6	3	4		0.9176	0.379478	0.849979	0.921065	0.655136	1.2208	0.283286	0.61885	0.4884
lpg0059, lpg1621, lpg1907, lpg2815	4	1	0	0	0	0	0	0	0	0	0	0	0	0	0	0	0	0	0	1		1	1	1	1	1	1	1	1	1	1	1	1	1	1	1	1	1	2		0.9176	0.379478	0.849979	0.921065	0.655136	0.406934	0.283286	0.61885	0.4884
lpg0059, lpg1621, lpg1907, lpg3000	4	5	0	0	0	0	0	1	2	0	0	1	0	0	0	0	0	2	1	0		1	1	1	1	1	2	3	1	1	2	1	1	1	1	1	3	2	1		0.9176	0.379478	0.849979	0.921065	0.655136	0.813868	0.849858	0.61885	0.4884
lpg0059, lpg1621, lpg1959	3	9	0	0	0	0	0	89	251	111	43	114	0	0	0	0	54	101	30	32		1	1	1	1	1	90	252	112	44	115	1	1	1	1	55	102	31	33		0.9176	0.379478	0.849979	0.921065	0.655136	36.6241	71.3881	69.3112	21.4896
lpg0059, lpg1621, lpg1959, lpg2223, lpg2733, lpg2874	6	1	0	0	0	0	0	0	1	0	0	0	0	0	0	0	0	0	0	0		1	1	1	1	1	1	2	1	1	1	1	1	1	1	1	1	1	1		0.9176	0.379478	0.849979	0.921065	0.655136	0.406934	0.566572	0.61885	0.4884
lpg0059, lpg1621, lpg1959, lpg2692	4	1	0	0	0	0	0	0	0	1	0	0	0	0	0	0	0	0	0	0		1	1	1	1	1	1	1	2	1	1	1	1	1	1	1	1	1	1		0.9176	0.379478	0.849979	0.921065	0.655136	0.406934	0.283286	1.2377	0.4884
lpg0059, lpg1621, lpg1959, lpg2815	4	3	0	0	0	0	0	1	0	0	0	0	0	0	0	0	0	4	0	1		1	1	1	1	1	2	1	1	1	1	1	1	1	1	1	5	1	2		0.9176	0.379478	0.849979	0.921065	0.655136	0.813868	0.283286	0.61885	0.4884
lpg0059, lpg1621, lpg3000	3	2	0	0	0	0	0	0	0	1	0	0	0	0	0	0	0	0	0	1		1	1	1	1	1	1	1	2	1	1	1	1	1	1	1	1	1	2		0.9176	0.379478	0.849979	0.921065	0.655136	0.406934	0.283286	1.2377	0.4884
lpg0059, lpg1661	2	15	5	3	0	7	0	2	4	3	1	0	10	20	8	16	312	284	1	3		6	4	1	8	1	3	5	4	2	1	11	21	9	17	313	285	2	4		5.5056	1.51791	0.849979	7.36852	0.655136	1.2208	1.41643	2.4754	0.976801
lpg0059, lpg1661, lpg2223	3	1	0	0	0	0	0	0	0	0	0	0	0	0	0	0	0	0	1	0		1	1	1	1	1	1	1	1	1	1	1	1	1	1	1	1	2	1		0.9176	0.379478	0.849979	0.921065	0.655136	0.406934	0.283286	0.61885	0.4884
lpg0059, lpg1661, lpg2223, lpg2692, lpg2804, lpg3000	6	1	0	0	0	0	0	0	0	0	0	0	0	0	0	0	1	0	0	0		1	1	1	1	1	1	1	1	1	1	1	1	1	1	2	1	1	1		0.9176	0.379478	0.849979	0.921065	0.655136	0.406934	0.283286	0.61885	0.4884
lpg0059, lpg1661, lpg2552, lpg2804, lpg2885	5	1	0	0	0	0	0	0	0	0	0	0	0	0	0	0	2	0	0	0		1	1	1	1	1	1	1	1	1	1	1	1	1	1	3	1	1	1		0.9176	0.379478	0.849979	0.921065	0.655136	0.406934	0.283286	0.61885	0.4884
lpg0059, lpg1661, lpg2584, lpg2804, lpg2885	5	1	0	0	0	0	0	0	0	0	0	0	0	0	0	0	1	0	0	0		1	1	1	1	1	1	1	1	1	1	1	1	1	1	2	1	1	1		0.9176	0.379478	0.849979	0.921065	0.655136	0.406934	0.283286	0.61885	0.4884
lpg0059, lpg1661, lpg2804	3	9	0	0	0	0	0	15	15	10	9	9	0	0	0	0	2381	2433	5	20		1	1	1	1	1	16	16	11	10	10	1	1	1	1	2382	2434	6	21		0.9176	0.379478	0.849979	0.921065	0.655136	6.51095	4.53258	6.80735	4.884
lpg0059, lpg1661, lpg2804, lpg2884, lpg2885	5	1	0	0	0	0	0	0	0	0	0	0	0	0	0	0	1	0	0	0		1	1	1	1	1	1	1	1	1	1	1	1	1	1	2	1	1	1		0.9176	0.379478	0.849979	0.921065	0.655136	0.406934	0.283286	0.61885	0.4884
lpg0059, lpg1661, lpg2874	3	3	1	0	0	0	0	0	0	0	0	0	0	0	1	2	0	0	0	0		2	1	1	1	1	1	1	1	1	1	1	1	2	3	1	1	1	1		1.8352	0.379478	0.849979	0.921065	0.655136	0.406934	0.283286	0.61885	0.4884
lpg0059, lpg1689	2	8	0	7	2	1	3	0	0	0	0	0	1	6	1	8	0	0	0	0		1	8	3	2	4	1	1	1	1	1	2	7	2	9	1	1	1	1		0.9176	3.03582	2.54994	1.84213	2.62055	0.406934	0.283286	0.61885	0.4884
lpg0059, lpg1689, lpg1701	3	1	0	0	0	0	0	0	0	0	0	0	0	0	1	0	0	0	0	0		1	1	1	1	1	1	1	1	1	1	1	1	2	1	1	1	1	1		0.9176	0.379478	0.849979	0.921065	0.655136	0.406934	0.283286	0.61885	0.4884
lpg0059, lpg1689, lpg1701, lpg1959	4	1	0	0	0	0	0	0	0	0	0	0	0	0	0	1	0	0	0	0		1	1	1	1	1	1	1	1	1	1	1	1	1	2	1	1	1	1		0.9176	0.379478	0.849979	0.921065	0.655136	0.406934	0.283286	0.61885	0.4884
lpg0059, lpg1689, lpg1701, lpg1959, lpg2244	5	2	0	0	2	0	0	0	0	0	0	0	0	0	0	1	0	0	0	0		1	1	3	1	1	1	1	1	1	1	1	1	1	2	1	1	1	1		0.9176	0.379478	2.54994	0.921065	0.655136	0.406934	0.283286	0.61885	0.4884
lpg0059, lpg1689, lpg1701, lpg1959, lpg2244, lpg2884	6	5	0	1	0	1	0	0	0	0	0	0	0	1	1	2	0	0	0	0		1	2	1	2	1	1	1	1	1	1	1	2	2	3	1	1	1	1		0.9176	0.758956	0.849979	1.84213	0.655136	0.406934	0.283286	0.61885	0.4884
lpg0059, lpg1689, lpg1701, lpg1959, lpg2884	5	1	0	0	0	0	0	0	0	0	0	0	0	0	0	2	0	0	0	0		1	1	1	1	1	1	1	1	1	1	1	1	1	3	1	1	1	1		0.9176	0.379478	0.849979	0.921065	0.655136	0.406934	0.283286	0.61885	0.4884
lpg0059, lpg1689, lpg1701, lpg2244	4	1	0	0	1	0	0	0	0	0	0	0	0	0	0	0	0	0	0	0		1	1	2	1	1	1	1	1	1	1	1	1	1	1	1	1	1	1		0.9176	0.379478	1.69996	0.921065	0.655136	0.406934	0.283286	0.61885	0.4884
lpg0059, lpg1689, lpg1907	3	9	2	14	11	8	7	0	0	0	0	0	5	15	7	23	0	0	0	0		3	15	12	9	8	1	1	1	1	1	6	16	8	24	1	1	1	1		2.7528	5.69217	10.1997	8.28958	5.24109	0.406934	0.283286	0.61885	0.4884
lpg0059, lpg1689, lpg1959, lpg2244, lpg2884	5	2	1	0	0	0	1	0	0	0	0	0	0	0	0	0	0	0	0	0		2	1	1	1	2	1	1	1	1	1	1	1	1	1	1	1	1	1		1.8352	0.379478	0.849979	0.921065	1.31027	0.406934	0.283286	0.61885	0.4884
lpg0059, lpg1689, lpg2874	3	8	3	10	2	2	3	0	0	0	0	0	1	1	0	1	0	0	0	0		4	11	3	3	4	1	1	1	1	1	2	2	1	2	1	1	1	1		3.6704	4.17426	2.54994	2.76319	2.62055	0.406934	0.283286	0.61885	0.4884
lpg0059, lpg1701	2	12	0	0	0	0	0	7	36	16	16	32	1	0	1	1	8	22	9	10		1	1	1	1	1	8	37	17	17	33	2	1	2	2	9	23	10	11		0.9176	0.379478	0.849979	0.921065	0.655136	3.25547	10.4816	10.5205	8.30281
lpg0059, lpg1701, lpg1907	3	1	0	0	0	0	0	0	1	0	0	0	0	0	0	0	0	0	0	0		1	1	1	1	1	1	2	1	1	1	1	1	1	1	1	1	1	1		0.9176	0.379478	0.849979	0.921065	0.655136	0.406934	0.566572	0.61885	0.4884
lpg0059, lpg1701, lpg1907, lpg3000	4	7	0	0	0	0	0	0	4	1	1	3	0	0	0	0	1	3	0	2		1	1	1	1	1	1	5	2	2	4	1	1	1	1	2	4	1	3		0.9176	0.379478	0.849979	0.921065	0.655136	0.406934	1.41643	1.2377	0.976801
lpg0059, lpg1701, lpg1959, lpg2884	4	1	0	0	0	1	0	0	0	0	0	0	0	0	0	0	0	0	0	0		1	1	1	2	1	1	1	1	1	1	1	1	1	1	1	1	1	1		0.9176	0.379478	0.849979	1.84213	0.655136	0.406934	0.283286	0.61885	0.4884
lpg0059, lpg1701, lpg3000	3	4	0	0	0	0	0	0	1	1	1	1	0	0	0	0	0	0	0	0		1	1	1	1	1	1	2	2	2	2	1	1	1	1	1	1	1	1		0.9176	0.379478	0.849979	0.921065	0.655136	0.406934	0.566572	1.2377	0.976801
lpg0059, lpg1702	2	1	0	0	0	0	0	0	0	0	0	0	0	0	0	0	0	1	0	0		1	1	1	1	1	1	1	1	1	1	1	1	1	1	1	2	1	1		0.9176	0.379478	0.849979	0.921065	0.655136	0.406934	0.283286	0.61885	0.4884
lpg0059, lpg1702, lpg1907	3	1	0	0	0	0	0	0	0	0	0	0	0	0	0	0	0	2	0	0		1	1	1	1	1	1	1	1	1	1	1	1	1	1	1	3	1	1		0.9176	0.379478	0.849979	0.921065	0.655136	0.406934	0.283286	0.61885	0.4884
lpg0059, lpg1702, lpg1907, lpg1959	4	4	0	0	0	0	0	1	0	0	1	0	0	0	0	0	0	4	3	0		1	1	1	1	1	2	1	1	2	1	1	1	1	1	1	5	4	1		0.9176	0.379478	0.849979	0.921065	0.655136	0.813868	0.283286	0.61885	0.976801
lpg0059, lpg1702, lpg1907, lpg1959, lpg2815	5	5	0	0	0	0	0	4	0	0	4	0	0	0	0	0	3	7	0	4		1	1	1	1	1	5	1	1	5	1	1	1	1	1	4	8	1	5		0.9176	0.379478	0.849979	0.921065	0.655136	2.03467	0.283286	0.61885	2.442
lpg0059, lpg1702, lpg1907, lpg2815	4	1	0	0	0	0	0	0	0	0	0	0	0	0	0	0	0	0	0	1		1	1	1	1	1	1	1	1	1	1	1	1	1	1	1	1	1	2		0.9176	0.379478	0.849979	0.921065	0.655136	0.406934	0.283286	0.61885	0.4884
lpg0059, lpg1702, lpg1959	3	2	0	0	0	0	0	0	0	0	0	0	0	0	0	0	0	1	1	0		1	1	1	1	1	1	1	1	1	1	1	1	1	1	1	2	2	1		0.9176	0.379478	0.849979	0.921065	0.655136	0.406934	0.283286	0.61885	0.4884
lpg0059, lpg1702, lpg1959, lpg2815	4	1	0	0	0	0	0	0	0	0	0	0	0	0	0	0	0	1	0	0		1	1	1	1	1	1	1	1	1	1	1	1	1	1	1	2	1	1		0.9176	0.379478	0.849979	0.921065	0.655136	0.406934	0.283286	0.61885	0.4884
lpg0059, lpg1702, lpg2815	3	1	0	0	0	0	0	0	0	0	0	0	0	0	0	0	0	0	1	0		1	1	1	1	1	1	1	1	1	1	1	1	1	1	1	1	2	1		0.9176	0.379478	0.849979	0.921065	0.655136	0.406934	0.283286	0.61885	0.4884
lpg0059, lpg1776	2	8	2	7	6	2	2	0	0	0	0	0	0	2	1	2	0	0	0	0		3	8	7	3	3	1	1	1	1	1	1	3	2	3	1	1	1	1		2.7528	3.03582	5.94985	2.76319	1.96541	0.406934	0.283286	0.61885	0.4884
lpg0059, lpg1776, lpg2244	3	9	9	42	23	3	5	0	0	0	0	0	3	3	2	5	0	0	0	0		10	43	24	4	6	1	1	1	1	1	4	4	3	6	1	1	1	1		9.176	16.3175	20.3995	3.68426	3.93082	0.406934	0.283286	0.61885	0.4884
lpg0059, lpg1776, lpg2733	3	6	3	7	3	0	2	0	0	0	0	0	0	0	4	6	0	0	0	0		4	8	4	1	3	1	1	1	1	1	1	1	5	7	1	1	1	1		3.6704	3.03582	3.39992	0.921065	1.96541	0.406934	0.283286	0.61885	0.4884
lpg0059, lpg1776, lpg2806	3	1	0	0	0	0	0	0	1	0	0	0	0	0	0	0	0	0	0	0		1	1	1	1	1	1	2	1	1	1	1	1	1	1	1	1	1	1		0.9176	0.379478	0.849979	0.921065	0.655136	0.406934	0.566572	0.61885	0.4884
lpg0059, lpg1907	2	9	0	6	2	1	0	0	0	0	1	1	2	5	1	9	0	0	0	0		1	7	3	2	1	1	1	1	2	2	3	6	2	10	1	1	1	1		0.9176	2.65634	2.54994	1.84213	0.655136	0.406934	0.283286	0.61885	0.976801
lpg0059, lpg1907, lpg1959	3	1	0	0	0	0	0	0	0	0	0	0	0	0	0	0	0	0	0	1		1	1	1	1	1	1	1	1	1	1	1	1	1	1	1	1	1	2		0.9176	0.379478	0.849979	0.921065	0.655136	0.406934	0.283286	0.61885	0.4884
lpg0059, lpg1907, lpg1959, lpg2815	4	2	0	0	0	0	0	1	0	0	1	0	0	0	0	0	0	0	0	0		1	1	1	1	1	2	1	1	2	1	1	1	1	1	1	1	1	1		0.9176	0.379478	0.849979	0.921065	0.655136	0.813868	0.283286	0.61885	0.976801
lpg0059, lpg1907, lpg2584, lpg2815, lpg2884	5	3	0	0	0	0	0	0	0	0	1	0	0	0	0	0	0	1	1	0		1	1	1	1	1	1	1	1	2	1	1	1	1	1	1	2	2	1		0.9176	0.379478	0.849979	0.921065	0.655136	0.406934	0.283286	0.61885	0.976801
lpg0059, lpg1907, lpg2733	3	2	0	0	0	0	0	0	1	0	0	0	0	0	0	0	0	1	0	0		1	1	1	1	1	1	2	1	1	1	1	1	1	1	1	2	1	1		0.9176	0.379478	0.849979	0.921065	0.655136	0.406934	0.566572	0.61885	0.4884
lpg0059, lpg1907, lpg2733, lpg3000	4	4	0	0	0	0	0	1	3	0	0	1	0	0	0	0	1	0	0	0		1	1	1	1	1	2	4	1	1	2	1	1	1	1	2	1	1	1		0.9176	0.379478	0.849979	0.921065	0.655136	0.813868	1.13314	0.61885	0.4884
lpg0059, lpg1907, lpg3000	3	2	0	0	0	0	0	0	0	2	0	1	0	0	0	0	0	0	0	0		1	1	1	1	1	1	1	3	1	2	1	1	1	1	1	1	1	1		0.9176	0.379478	0.849979	0.921065	0.655136	0.406934	0.283286	1.85655	0.4884
lpg0059, lpg1959	2	9	0	0	0	0	0	9	23	13	4	16	0	0	0	0	3	7	4	3		1	1	1	1	1	10	24	14	5	17	1	1	1	1	4	8	5	4		0.9176	0.379478	0.849979	0.921065	0.655136	4.06934	6.79887	8.6639	2.442
lpg0059, lpg1959, lpg2815	3	1	0	0	0	0	0	0	0	0	0	0	0	0	0	0	0	0	0	2		1	1	1	1	1	1	1	1	1	1	1	1	1	1	1	1	1	3		0.9176	0.379478	0.849979	0.921065	0.655136	0.406934	0.283286	0.61885	0.4884
lpg0059, lpg2223	2	18	1	8	2	4	3	8	19	10	3	13	2	5	1	8	6	21	8	14		2	9	3	5	4	9	20	11	4	14	3	6	2	9	7	22	9	15		1.8352	3.4153	2.54994	4.60532	2.62055	3.66241	5.66572	6.80735	1.9536
lpg0059, lpg2223, lpg2552	3	1	1	0	0	0	0	0	0	0	0	0	0	0	0	0	0	0	0	0		2	1	1	1	1	1	1	1	1	1	1	1	1	1	1	1	1	1		1.8352	0.379478	0.849979	0.921065	0.655136	0.406934	0.283286	0.61885	0.4884
lpg0059, lpg2244	2	6	1	6	4	0	1	0	0	0	0	0	1	1	0	0	0	0	0	0		2	7	5	1	2	1	1	1	1	1	2	2	1	1	1	1	1	1		1.8352	2.65634	4.24989	0.921065	1.31027	0.406934	0.283286	0.61885	0.4884
lpg0059, lpg2244, lpg2552, lpg2692	4	1	0	1	0	0	0	0	0	0	0	0	0	0	0	0	0	0	0	0		1	2	1	1	1	1	1	1	1	1	1	1	1	1	1	1	1	1		0.9176	0.758956	0.849979	0.921065	0.655136	0.406934	0.283286	0.61885	0.4884
lpg0059, lpg2244, lpg2874	3	2	0	0	0	0	0	0	0	0	0	0	0	2	0	1	0	0	0	0		1	1	1	1	1	1	1	1	1	1	1	3	1	2	1	1	1	1		0.9176	0.379478	0.849979	0.921065	0.655136	0.406934	0.283286	0.61885	0.4884
lpg0059, lpg2244, lpg2874, lpg2885	4	8	1	4	0	2	2	0	0	0	0	0	4	10	3	13	0	0	0	0		2	5	1	3	3	1	1	1	1	1	5	11	4	14	1	1	1	1		1.8352	1.89739	0.849979	2.76319	1.96541	0.406934	0.283286	0.61885	0.4884
lpg0059, lpg2244, lpg2885	3	4	0	0	1	0	1	0	0	0	0	0	0	2	0	4	0	0	0	0		1	1	2	1	2	1	1	1	1	1	1	3	1	5	1	1	1	1		0.9176	0.379478	1.69996	0.921065	1.31027	0.406934	0.283286	0.61885	0.4884
lpg0059, lpg2271, lpg2885	3	1	0	0	0	0	0	0	0	0	0	0	0	0	0	1	0	0	0	0		1	1	1	1	1	1	1	1	1	1	1	1	1	2	1	1	1	1		0.9176	0.379478	0.849979	0.921065	0.655136	0.406934	0.283286	0.61885	0.4884
lpg0059, lpg2552	2	9	0	0	0	0	0	15	20	6	5	11	0	0	0	0	10	16	3	9		1	1	1	1	1	16	21	7	6	12	1	1	1	1	11	17	4	10		0.9176	0.379478	0.849979	0.921065	0.655136	6.51095	5.94901	4.33195	2.9304
lpg0059, lpg2552, lpg3000	3	9	0	0	0	0	0	3	11	5	4	5	0	0	0	0	2	10	1	1		1	1	1	1	1	4	12	6	5	6	1	1	1	1	3	11	2	2		0.9176	0.379478	0.849979	0.921065	0.655136	1.62774	3.39943	3.7131	2.442
lpg0059, lpg2584, lpg2815, lpg2884	4	1	0	0	0	0	0	1	0	0	0	0	0	0	0	0	0	0	0	0		1	1	1	1	1	2	1	1	1	1	1	1	1	1	1	1	1	1		0.9176	0.379478	0.849979	0.921065	0.655136	0.813868	0.283286	0.61885	0.4884
lpg0059, lpg2692	2	5	0	3	3	0	0	0	0	0	0	0	1	0	1	4	0	0	0	0		1	4	4	1	1	1	1	1	1	1	2	1	2	5	1	1	1	1		0.9176	1.51791	3.39992	0.921065	0.655136	0.406934	0.283286	0.61885	0.4884
lpg0059, lpg2733	2	5	1	2	0	0	1	0	0	0	0	0	0	0	1	2	0	0	0	0		2	3	1	1	2	1	1	1	1	1	1	1	2	3	1	1	1	1		1.8352	1.13843	0.849979	0.921065	1.31027	0.406934	0.283286	0.61885	0.4884
lpg0059, lpg2733, lpg3000	3	3	0	0	0	0	0	0	0	1	0	1	0	0	0	0	0	1	0	0		1	1	1	1	1	1	1	2	1	2	1	1	1	1	1	2	1	1		0.9176	0.379478	0.849979	0.921065	0.655136	0.406934	0.283286	1.2377	0.4884
lpg0059, lpg2804	2	9	0	0	0	0	0	4	9	5	1	4	0	0	0	0	454	471	1	5		1	1	1	1	1	5	10	6	2	5	1	1	1	1	455	472	2	6		0.9176	0.379478	0.849979	0.921065	0.655136	2.03467	2.83286	3.7131	0.976801
lpg0059, lpg2806	2	3	0	0	0	0	0	0	309	125	0	0	0	0	0	0	0	0	0	169		1	1	1	1	1	1	310	126	1	1	1	1	1	1	1	1	1	170		0.9176	0.379478	0.849979	0.921065	0.655136	0.406934	87.8187	77.9751	0.4884
lpg0059, lpg2874	2	9	1	5	1	4	2	0	0	0	0	0	2	1	1	5	0	0	0	0		2	6	2	5	3	1	1	1	1	1	3	2	2	6	1	1	1	1		1.8352	2.27687	1.69996	4.60532	1.96541	0.406934	0.283286	0.61885	0.4884
lpg0059, lpg2874, lpg2885	3	4	0	2	0	0	0	0	0	0	0	0	1	1	0	3	0	0	0	0		1	3	1	1	1	1	1	1	1	1	2	2	1	4	1	1	1	1		0.9176	1.13843	0.849979	0.921065	0.655136	0.406934	0.283286	0.61885	0.4884
lpg0059, lpg2884	2	9	9	20	8	23	8	0	0	0	0	0	12	22	7	30	0	0	0	0		10	21	9	24	9	1	1	1	1	1	13	23	8	31	1	1	1	1		9.176	7.96903	7.64981	22.1056	5.89623	0.406934	0.283286	0.61885	0.4884
lpg0059, lpg2885	2	3	0	1	1	0	0	0	0	0	0	0	0	0	1	0	0	0	0	0		1	2	2	1	1	1	1	1	1	1	1	1	2	1	1	1	1	1		0.9176	0.758956	1.69996	0.921065	0.655136	0.406934	0.283286	0.61885	0.4884
lpg0059, lpg3000	2	10	0	0	0	0	0	1	1	1	2	0	1	3	1	7	0	4	1	0		1	1	1	1	1	2	2	2	3	1	2	4	2	8	1	5	2	1		0.9176	0.379478	0.849979	0.921065	0.655136	0.813868	0.566572	1.2377	1.4652
lpg0086	1	17	33	7	0	31	1	33	30	5	28	17	129	11	47	5	23	26	24	31		34	8	1	32	2	34	31	6	29	18	130	12	48	6	24	27	25	32		31.1984	3.03582	0.849979	29.4741	1.31027	13.8358	8.78187	3.7131	14.1636
lpg0086, lpg0096	2	4	0	0	0	0	0	24	0	0	26	16	0	0	0	0	0	19	0	0		1	1	1	1	1	25	1	1	27	17	1	1	1	1	1	20	1	1		0.9176	0.379478	0.849979	0.921065	0.655136	10.1734	0.283286	0.61885	13.1868
lpg0086, lpg0096, lpg0171, lpg0246, lpg2806	5	3	0	0	0	0	0	0	0	0	5	4	0	0	0	0	0	3	0	0		1	1	1	1	1	1	1	1	6	5	1	1	1	1	1	4	1	1		0.9176	0.379478	0.849979	0.921065	0.655136	0.406934	0.283286	0.61885	2.9304
lpg0086, lpg0096, lpg0246, lpg2806	4	4	0	0	0	0	0	1	0	0	1	1	0	0	0	0	0	1	0	0		1	1	1	1	1	2	1	1	2	2	1	1	1	1	1	2	1	1		0.9176	0.379478	0.849979	0.921065	0.655136	0.813868	0.283286	0.61885	0.976801
lpg0086, lpg0096, lpg0963, lpg1907, lpg2271, lpg2552, lpg2584	7	1	0	0	0	0	0	0	0	0	1	0	0	0	0	0	0	0	0	0		1	1	1	1	1	1	1	1	2	1	1	1	1	1	1	1	1	1		0.9176	0.379478	0.849979	0.921065	0.655136	0.406934	0.283286	0.61885	0.976801
lpg0086, lpg0107	2	2	0	0	0	0	0	1	0	0	2	0	0	0	0	0	0	0	0	0		1	1	1	1	1	2	1	1	3	1	1	1	1	1	1	1	1	1		0.9176	0.379478	0.849979	0.921065	0.655136	0.813868	0.283286	0.61885	1.4652
lpg0086, lpg0107, lpg0404	3	6	0	0	0	0	0	9	2	0	8	0	0	0	0	0	9	3	2	0		1	1	1	1	1	10	3	1	9	1	1	1	1	1	10	4	3	1		0.9176	0.379478	0.849979	0.921065	0.655136	4.06934	0.849858	0.61885	4.3956
lpg0086, lpg0107, lpg0404, lpg1137	4	8	0	0	0	0	0	21	1	0	15	4	0	0	0	0	9	14	6	4		1	1	1	1	1	22	2	1	16	5	1	1	1	1	10	15	7	5		0.9176	0.379478	0.849979	0.921065	0.655136	8.95255	0.566572	0.61885	7.81441
lpg0086, lpg0107, lpg0404, lpg1137, lpg2733	5	9	0	0	0	0	0	72	15	5	73	16	0	0	0	0	62	36	24	27		1	1	1	1	1	73	16	6	74	17	1	1	1	1	63	37	25	28		0.9176	0.379478	0.849979	0.921065	0.655136	29.7062	4.53258	3.7131	36.1416
lpg0086, lpg0107, lpg0404, lpg2733	4	8	0	0	0	0	0	6	1	0	6	1	0	0	0	0	4	5	4	3		1	1	1	1	1	7	2	1	7	2	1	1	1	1	5	6	5	4		0.9176	0.379478	0.849979	0.921065	0.655136	2.84854	0.566572	0.61885	3.4188
lpg0086, lpg0107, lpg0518	3	3	0	2	0	0	1	0	0	0	0	0	1	0	0	0	0	0	0	0		1	3	1	1	2	1	1	1	1	1	2	1	1	1	1	1	1	1		0.9176	1.13843	0.849979	0.921065	1.31027	0.406934	0.283286	0.61885	0.4884
lpg0086, lpg0107, lpg0518, lpg1661	4	3	0	0	0	1	0	0	0	0	0	0	0	0	2	3	0	0	0	0		1	1	1	2	1	1	1	1	1	1	1	1	3	4	1	1	1	1		0.9176	0.379478	0.849979	1.84213	0.655136	0.406934	0.283286	0.61885	0.4884
lpg0086, lpg0107, lpg0518, lpg1661, lpg2552	5	9	5	2	5	7	0	0	0	0	0	0	7	4	5	27	0	0	1	0		6	3	6	8	1	1	1	1	1	1	8	5	6	28	1	1	2	1		5.5056	1.13843	5.09987	7.36852	0.655136	0.406934	0.283286	0.61885	0.4884
lpg0086, lpg0107, lpg0518, lpg2552	4	7	1	3	0	2	5	0	0	0	0	0	2	0	1	1	0	0	0	0		2	4	1	3	6	1	1	1	1	1	3	1	2	2	1	1	1	1		1.8352	1.51791	0.849979	2.76319	3.93082	0.406934	0.283286	0.61885	0.4884
lpg0086, lpg0107, lpg0963, lpg1137, lpg2733, lpg2804, lpg2884	7	1	0	0	0	0	0	0	0	0	0	0	0	0	0	0	0	1	0	0		1	1	1	1	1	1	1	1	1	1	1	1	1	1	1	2	1	1		0.9176	0.379478	0.849979	0.921065	0.655136	0.406934	0.283286	0.61885	0.4884
lpg0086, lpg0107, lpg1137	3	7	0	0	0	0	0	2	1	0	2	0	0	0	0	0	4	3	1	1		1	1	1	1	1	3	2	1	3	1	1	1	1	1	5	4	2	2		0.9176	0.379478	0.849979	0.921065	0.655136	1.2208	0.566572	0.61885	1.4652
lpg0086, lpg0107, lpg1137, lpg2552, lpg2584	5	1	0	0	0	0	0	0	0	0	0	0	0	0	0	1	0	0	0	0		1	1	1	1	1	1	1	1	1	1	1	1	1	2	1	1	1	1		0.9176	0.379478	0.849979	0.921065	0.655136	0.406934	0.283286	0.61885	0.4884
lpg0086, lpg0107, lpg1137, lpg2733	4	6	0	0	0	0	0	6	0	1	4	0	0	0	0	0	1	2	1	0		1	1	1	1	1	7	1	2	5	1	1	1	1	1	2	3	2	1		0.9176	0.379478	0.849979	0.921065	0.655136	2.84854	0.283286	1.2377	2.442
lpg0086, lpg0107, lpg1661, lpg2552	4	4	0	0	0	1	0	0	0	0	0	0	1	1	0	3	0	0	0	0		1	1	1	2	1	1	1	1	1	1	2	2	1	4	1	1	1	1		0.9176	0.379478	0.849979	1.84213	0.655136	0.406934	0.283286	0.61885	0.4884
lpg0086, lpg0107, lpg2733	3	1	0	0	0	0	0	0	1	0	0	0	0	0	0	0	0	0	0	0		1	1	1	1	1	1	2	1	1	1	1	1	1	1	1	1	1	1		0.9176	0.379478	0.849979	0.921065	0.655136	0.406934	0.566572	0.61885	0.4884
lpg0086, lpg0140	2	3	0	0	0	2	0	0	0	0	0	0	0	0	1	1	0	0	0	0		1	1	1	3	1	1	1	1	1	1	1	1	2	2	1	1	1	1		0.9176	0.379478	0.849979	2.76319	0.655136	0.406934	0.283286	0.61885	0.4884
lpg0086, lpg0140, lpg2815	3	6	2	0	0	2	0	0	0	0	0	0	1	4	1	8	0	0	0	0		3	1	1	3	1	1	1	1	1	1	2	5	2	9	1	1	1	1		2.7528	0.379478	0.849979	2.76319	0.655136	0.406934	0.283286	0.61885	0.4884
lpg0086, lpg0171	2	9	0	0	0	0	0	18	12	3	9	2	0	0	0	0	8	15	2	8		1	1	1	1	1	19	13	4	10	3	1	1	1	1	9	16	3	9		0.9176	0.379478	0.849979	0.921065	0.655136	7.73175	3.68272	2.4754	4.884
lpg0086, lpg0171, lpg0246, lpg2806	4	3	0	0	0	0	0	0	0	0	2	1	0	0	0	0	1	0	0	0		1	1	1	1	1	1	1	1	3	2	1	1	1	1	2	1	1	1		0.9176	0.379478	0.849979	0.921065	0.655136	0.406934	0.283286	0.61885	1.4652
lpg0086, lpg0171, lpg1907	3	4	0	0	0	0	0	3	0	0	1	0	0	0	0	0	0	4	1	0		1	1	1	1	1	4	1	1	2	1	1	1	1	1	1	5	2	1		0.9176	0.379478	0.849979	0.921065	0.655136	1.62774	0.283286	0.61885	0.976801
lpg0086, lpg0171, lpg1907, lpg2885	4	7	0	0	0	0	0	30	2	0	9	0	0	0	0	0	10	13	20	6		1	1	1	1	1	31	3	1	10	1	1	1	1	1	11	14	21	7		0.9176	0.379478	0.849979	0.921065	0.655136	12.615	0.849858	0.61885	4.884
lpg0086, lpg0171, lpg2271	3	10	0	0	0	0	0	98	102	39	61	44	0	0	1	0	47	95	37	51		1	1	1	1	1	99	103	40	62	45	1	1	2	1	48	96	38	52		0.9176	0.379478	0.849979	0.921065	0.655136	40.2865	29.1785	24.754	30.2808
lpg0086, lpg0171, lpg2885	3	5	0	0	0	0	0	2	0	0	1	0	0	0	0	0	1	2	2	0		1	1	1	1	1	3	1	1	2	1	1	1	1	1	2	3	3	1		0.9176	0.379478	0.849979	0.921065	0.655136	1.2208	0.283286	0.61885	0.976801
lpg0086, lpg0246	2	3	0	0	0	0	0	3	0	2	0	0	0	0	0	0	0	1	0	0		1	1	1	1	1	4	1	3	1	1	1	1	1	1	1	2	1	1		0.9176	0.379478	0.849979	0.921065	0.655136	1.62774	0.283286	1.85655	0.4884
lpg0086, lpg0246, lpg0518	3	9	0	0	0	0	0	6	12	6	7	11	0	0	0	0	6	11	1	2		1	1	1	1	1	7	13	7	8	12	1	1	1	1	7	12	2	3		0.9176	0.379478	0.849979	0.921065	0.655136	2.84854	3.68272	4.33195	3.9072
lpg0086, lpg0246, lpg1527, lpg1689, lpg1701	5	2	0	0	0	0	0	0	0	0	0	0	0	0	0	0	0	1	1	0		1	1	1	1	1	1	1	1	1	1	1	1	1	1	1	2	2	1		0.9176	0.379478	0.849979	0.921065	0.655136	0.406934	0.283286	0.61885	0.4884
lpg0086, lpg0246, lpg1527, lpg1689, lpg1701, lpg2884	6	1	0	0	0	0	0	0	1	0	0	0	0	0	0	0	0	0	0	0		1	1	1	1	1	1	2	1	1	1	1	1	1	1	1	1	1	1		0.9176	0.379478	0.849979	0.921065	0.655136	0.406934	0.566572	0.61885	0.4884
lpg0086, lpg0246, lpg2806	3	1	0	0	0	0	0	0	0	0	1	0	0	0	0	0	0	0	0	0		1	1	1	1	1	1	1	1	2	1	1	1	1	1	1	1	1	1		0.9176	0.379478	0.849979	0.921065	0.655136	0.406934	0.283286	0.61885	0.976801
lpg0086, lpg0404, lpg1099, lpg1137, lpg2733	5	1	0	0	0	0	0	0	0	0	0	0	0	0	0	0	0	0	0	1		1	1	1	1	1	1	1	1	1	1	1	1	1	1	1	1	1	2		0.9176	0.379478	0.849979	0.921065	0.655136	0.406934	0.283286	0.61885	0.4884
lpg0086, lpg0404, lpg1137	3	6	0	0	0	0	0	2	1	1	0	0	0	0	0	0	1	0	1	1		1	1	1	1	1	3	2	2	1	1	1	1	1	1	2	1	2	2		0.9176	0.379478	0.849979	0.921065	0.655136	1.2208	0.566572	1.2377	0.4884
lpg0086, lpg0404, lpg1137, lpg2733	4	7	0	0	0	0	0	8	2	0	2	0	0	0	0	0	6	2	2	1		1	1	1	1	1	9	3	1	3	1	1	1	1	1	7	3	3	2		0.9176	0.379478	0.849979	0.921065	0.655136	3.66241	0.849858	0.61885	1.4652
lpg0086, lpg0404, lpg1701	3	5	0	0	0	0	0	4	0	0	4	0	0	0	0	0	3	0	1	3		1	1	1	1	1	5	1	1	5	1	1	1	1	1	4	1	2	4		0.9176	0.379478	0.849979	0.921065	0.655136	2.03467	0.283286	0.61885	2.442
lpg0086, lpg0404, lpg2584, lpg2884, lpg2885	5	1	0	0	0	0	0	0	0	0	0	0	0	0	0	0	0	1	0	0		1	1	1	1	1	1	1	1	1	1	1	1	1	1	1	2	1	1		0.9176	0.379478	0.849979	0.921065	0.655136	0.406934	0.283286	0.61885	0.4884
lpg0086, lpg0404, lpg2733	3	3	0	0	0	0	0	0	0	0	1	0	0	0	0	0	1	1	0	0		1	1	1	1	1	1	1	1	2	1	1	1	1	1	2	2	1	1		0.9176	0.379478	0.849979	0.921065	0.655136	0.406934	0.283286	0.61885	0.976801
lpg0086, lpg0439	2	3	0	0	0	0	0	0	0	0	0	0	2	1	4	0	0	0	0	0		1	1	1	1	1	1	1	1	1	1	3	2	5	1	1	1	1	1		0.9176	0.379478	0.849979	0.921065	0.655136	0.406934	0.283286	0.61885	0.4884
lpg0086, lpg0518	2	7	0	0	0	0	0	0	1	1	0	2	0	0	0	0	2	2	1	1		1	1	1	1	1	1	2	2	1	3	1	1	1	1	3	3	2	2		0.9176	0.379478	0.849979	0.921065	0.655136	0.406934	0.566572	1.2377	0.4884
lpg0086, lpg0518, lpg1137, lpg2552, lpg2884	5	1	0	0	0	0	0	0	0	0	0	0	0	0	0	0	0	1	0	0		1	1	1	1	1	1	1	1	1	1	1	1	1	1	1	2	1	1		0.9176	0.379478	0.849979	0.921065	0.655136	0.406934	0.283286	0.61885	0.4884
lpg0086, lpg0518, lpg1661, lpg2552	4	1	0	0	0	0	0	0	0	0	0	0	0	0	0	3	0	0	0	0		1	1	1	1	1	1	1	1	1	1	1	1	1	4	1	1	1	1		0.9176	0.379478	0.849979	0.921065	0.655136	0.406934	0.283286	0.61885	0.4884
lpg0086, lpg0518, lpg2552	3	1	0	0	1	0	0	0	0	0	0	0	0	0	0	0	0	0	0	0		1	1	2	1	1	1	1	1	1	1	1	1	1	1	1	1	1	1		0.9176	0.379478	1.69996	0.921065	0.655136	0.406934	0.283286	0.61885	0.4884
lpg0086, lpg0621, lpg1907	3	5	1	0	0	3	0	0	0	0	0	0	0	3	1	0	0	0	0	1		2	1	1	4	1	1	1	1	1	1	1	4	2	1	1	1	1	2		1.8352	0.379478	0.849979	3.68426	0.655136	0.406934	0.283286	0.61885	0.4884
lpg0086, lpg0621, lpg1907, lpg2815	4	6	4	0	0	5	0	0	0	0	0	0	3	8	3	12	0	0	0	0		5	1	1	6	1	1	1	1	1	1	4	9	4	13	1	1	1	1		4.588	0.379478	0.849979	5.52639	0.655136	0.406934	0.283286	0.61885	0.4884
lpg0086, lpg0621, lpg1959, lpg2884, lpg3000	5	2	0	0	0	1	0	0	0	0	0	0	1	0	0	0	0	0	0	0		1	1	1	2	1	1	1	1	1	1	2	1	1	1	1	1	1	1		0.9176	0.379478	0.849979	1.84213	0.655136	0.406934	0.283286	0.61885	0.4884
lpg0086, lpg0621, lpg2815	3	3	0	1	0	0	0	0	0	0	0	0	0	0	1	1	0	0	0	0		1	2	1	1	1	1	1	1	1	1	1	1	2	2	1	1	1	1		0.9176	0.758956	0.849979	0.921065	0.655136	0.406934	0.283286	0.61885	0.4884
lpg0086, lpg0963, lpg2223, lpg2552, lpg2888, lpg3000	6	2	0	0	0	1	0	0	0	0	0	0	0	0	1	0	0	0	0	0		1	1	1	2	1	1	1	1	1	1	1	1	2	1	1	1	1	1		0.9176	0.379478	0.849979	1.84213	0.655136	0.406934	0.283286	0.61885	0.4884
lpg0086, lpg0963, lpg2888, lpg3000	4	1	0	0	0	1	0	0	0	0	0	0	0	0	0	0	0	0	0	0		1	1	1	2	1	1	1	1	1	1	1	1	1	1	1	1	1	1		0.9176	0.379478	0.849979	1.84213	0.655136	0.406934	0.283286	0.61885	0.4884
lpg0086, lpg0963, lpg3000	3	1	0	0	0	0	0	0	0	0	0	0	1	0	0	0	0	0	0	0		1	1	1	1	1	1	1	1	1	1	2	1	1	1	1	1	1	1		0.9176	0.379478	0.849979	0.921065	0.655136	0.406934	0.283286	0.61885	0.4884
lpg0086, lpg1099	2	1	0	0	0	0	0	0	0	0	0	0	0	0	0	0	0	0	0	13		1	1	1	1	1	1	1	1	1	1	1	1	1	1	1	1	1	14		0.9176	0.379478	0.849979	0.921065	0.655136	0.406934	0.283286	0.61885	0.4884
lpg0086, lpg1137	2	1	0	0	0	0	0	0	0	0	1	0	0	0	0	0	0	0	0	0		1	1	1	1	1	1	1	1	2	1	1	1	1	1	1	1	1	1		0.9176	0.379478	0.849979	0.921065	0.655136	0.406934	0.283286	0.61885	0.976801
lpg0086, lpg1137, lpg2733	3	5	0	0	0	0	0	0	0	0	0	3	0	0	0	0	2	2	1	1		1	1	1	1	1	1	1	1	1	4	1	1	1	1	3	3	2	2		0.9176	0.379478	0.849979	0.921065	0.655136	0.406934	0.283286	0.61885	0.4884
lpg0086, lpg1148	2	8	0	0	0	0	0	4	2	0	7	6	0	0	0	0	3	7	2	2		1	1	1	1	1	5	3	1	8	7	1	1	1	1	4	8	3	3		0.9176	0.379478	0.849979	0.921065	0.655136	2.03467	0.849858	0.61885	3.9072
lpg0086, lpg1148, lpg2223	3	9	0	0	0	0	0	62	36	12	65	31	0	0	0	0	25	42	17	24		1	1	1	1	1	63	37	13	66	32	1	1	1	1	26	43	18	25		0.9176	0.379478	0.849979	0.921065	0.655136	25.6369	10.4816	8.04505	32.2344
lpg0086, lpg1525, lpg1701, lpg1959, lpg2223, lpg2692, lpg3000	7	1	0	0	0	0	0	0	1	0	0	0	0	0	0	0	0	0	0	0		1	1	1	1	1	1	2	1	1	1	1	1	1	1	1	1	1	1		0.9176	0.379478	0.849979	0.921065	0.655136	0.406934	0.566572	0.61885	0.4884
lpg0086, lpg1527	2	9	0	0	0	0	0	16	10	4	12	6	0	0	0	0	12	13	14	10		1	1	1	1	1	17	11	5	13	7	1	1	1	1	13	14	15	11		0.9176	0.379478	0.849979	0.921065	0.655136	6.91788	3.11615	3.09425	6.34921
lpg0086, lpg1527, lpg1907, lpg2884, lpg2885	5	1	0	0	0	0	0	1	0	0	0	0	0	0	0	0	0	0	0	0		1	1	1	1	1	2	1	1	1	1	1	1	1	1	1	1	1	1		0.9176	0.379478	0.849979	0.921065	0.655136	0.813868	0.283286	0.61885	0.4884
lpg0086, lpg1527, lpg2884	3	11	0	0	0	0	0	99	50	18	64	26	1	0	1	0	66	74	89	59		1	1	1	1	1	100	51	19	65	27	2	1	2	1	67	75	90	60		0.9176	0.379478	0.849979	0.921065	0.655136	40.6934	14.4476	11.7582	31.746
lpg0086, lpg1661, lpg1959, lpg2733	4	1	0	0	0	0	0	0	0	0	0	0	0	0	0	0	0	1	0	0		1	1	1	1	1	1	1	1	1	1	1	1	1	1	1	2	1	1		0.9176	0.379478	0.849979	0.921065	0.655136	0.406934	0.283286	0.61885	0.4884
lpg0086, lpg1661, lpg2552	3	1	1	0	0	0	0	0	0	0	0	0	0	0	0	0	0	0	0	0		2	1	1	1	1	1	1	1	1	1	1	1	1	1	1	1	1	1		1.8352	0.379478	0.849979	0.921065	0.655136	0.406934	0.283286	0.61885	0.4884
lpg0086, lpg1689, lpg1701	3	1	0	0	0	0	0	0	0	0	0	0	0	0	0	0	0	0	1	0		1	1	1	1	1	1	1	1	1	1	1	1	1	1	1	1	2	1		0.9176	0.379478	0.849979	0.921065	0.655136	0.406934	0.283286	0.61885	0.4884
lpg0086, lpg1701	2	8	0	0	0	0	0	3	0	3	2	2	0	0	0	0	1	1	3	1		1	1	1	1	1	4	1	4	3	3	1	1	1	1	2	2	4	2		0.9176	0.379478	0.849979	0.921065	0.655136	1.62774	0.283286	2.4754	1.4652
lpg0086, lpg1701, lpg1959	3	9	0	0	0	0	0	25	26	15	11	18	0	0	0	0	23	22	8	24		1	1	1	1	1	26	27	16	12	19	1	1	1	1	24	23	9	25		0.9176	0.379478	0.849979	0.921065	0.655136	10.5803	7.64873	9.9016	5.86081
lpg0086, lpg1702	2	1	0	0	0	0	0	0	0	0	0	0	0	0	0	0	1	0	0	0		1	1	1	1	1	1	1	1	1	1	1	1	1	1	2	1	1	1		0.9176	0.379478	0.849979	0.921065	0.655136	0.406934	0.283286	0.61885	0.4884
lpg0086, lpg1702, lpg1776	3	5	0	0	0	0	0	3	0	0	5	0	0	0	0	0	3	2	0	3		1	1	1	1	1	4	1	1	6	1	1	1	1	1	4	3	1	4		0.9176	0.379478	0.849979	0.921065	0.655136	1.62774	0.283286	0.61885	2.9304
lpg0086, lpg1702, lpg1776, lpg2815	4	6	0	0	0	0	0	17	0	0	14	0	0	0	0	0	7	20	5	5		1	1	1	1	1	18	1	1	15	1	1	1	1	1	8	21	6	6		0.9176	0.379478	0.849979	0.921065	0.655136	7.32481	0.283286	0.61885	7.32601
lpg0086, lpg1702, lpg2815	3	4	0	0	0	0	0	1	0	0	2	0	0	0	0	0	1	0	0	1		1	1	1	1	1	2	1	1	3	1	1	1	1	1	2	1	1	2		0.9176	0.379478	0.849979	0.921065	0.655136	0.813868	0.283286	0.61885	1.4652
lpg0086, lpg1776	2	2	0	0	0	0	0	0	0	0	1	0	0	0	0	0	0	0	0	1		1	1	1	1	1	1	1	1	2	1	1	1	1	1	1	1	1	2		0.9176	0.379478	0.849979	0.921065	0.655136	0.406934	0.283286	0.61885	0.976801
lpg0086, lpg1776, lpg2815	3	3	0	0	0	0	0	1	0	0	1	0	0	0	0	0	0	0	1	0		1	1	1	1	1	2	1	1	2	1	1	1	1	1	1	1	2	1		0.9176	0.379478	0.849979	0.921065	0.655136	0.813868	0.283286	0.61885	0.976801
lpg0086, lpg1907	2	4	1	0	0	0	0	1	0	0	0	0	1	0	0	1	0	0	0	0		2	1	1	1	1	2	1	1	1	1	2	1	1	2	1	1	1	1		1.8352	0.379478	0.849979	0.921065	0.655136	0.813868	0.283286	0.61885	0.4884
lpg0086, lpg1907, lpg2815	3	3	1	0	0	2	0	0	0	0	0	0	0	1	0	0	0	0	0	0		2	1	1	3	1	1	1	1	1	1	1	2	1	1	1	1	1	1		1.8352	0.379478	0.849979	2.76319	0.655136	0.406934	0.283286	0.61885	0.4884
lpg0086, lpg1907, lpg2885	3	5	0	0	0	0	0	7	0	0	1	0	0	0	0	0	2	1	1	0		1	1	1	1	1	8	1	1	2	1	1	1	1	1	3	2	2	1		0.9176	0.379478	0.849979	0.921065	0.655136	3.25547	0.283286	0.61885	0.976801
lpg0086, lpg1959	2	9	0	0	0	0	0	24	20	8	20	8	0	0	0	0	9	12	13	12		1	1	1	1	1	25	21	9	21	9	1	1	1	1	10	13	14	13		0.9176	0.379478	0.849979	0.921065	0.655136	10.1734	5.94901	5.56965	10.2564
lpg0086, lpg1959, lpg2733	3	9	0	0	0	0	0	37	33	12	21	19	0	0	0	0	19	41	19	23		1	1	1	1	1	38	34	13	22	20	1	1	1	1	20	42	20	24		0.9176	0.379478	0.849979	0.921065	0.655136	15.4635	9.63173	8.04505	10.7448
lpg0086, lpg2223	2	9	0	0	0	0	0	5	2	1	6	3	0	0	0	0	1	3	2	2		1	1	1	1	1	6	3	2	7	4	1	1	1	1	2	4	3	3		0.9176	0.379478	0.849979	0.921065	0.655136	2.4416	0.849858	1.2377	3.4188
lpg0086, lpg2223, lpg2815, lpg2884	4	1	0	0	0	0	0	0	0	0	0	0	0	0	1	0	0	0	0	0		1	1	1	1	1	1	1	1	1	1	1	1	2	1	1	1	1	1		0.9176	0.379478	0.849979	0.921065	0.655136	0.406934	0.283286	0.61885	0.4884
lpg0086, lpg2223, lpg3000	3	1	0	0	0	1	0	0	0	0	0	0	0	0	0	0	0	0	0	0		1	1	1	2	1	1	1	1	1	1	1	1	1	1	1	1	1	1		0.9176	0.379478	0.849979	1.84213	0.655136	0.406934	0.283286	0.61885	0.4884
lpg0086, lpg2271	2	9	0	0	0	0	0	15	18	7	6	9	0	0	0	0	6	16	6	5		1	1	1	1	1	16	19	8	7	10	1	1	1	1	7	17	7	6		0.9176	0.379478	0.849979	0.921065	0.655136	6.51095	5.38244	4.9508	3.4188
lpg0086, lpg2552	2	10	0	0	0	0	0	38	34	15	41	22	0	0	1	0	28	56	17	30		1	1	1	1	1	39	35	16	42	23	1	1	2	1	29	57	18	31		0.9176	0.379478	0.849979	0.921065	0.655136	15.8704	9.91501	9.9016	20.5128
lpg0086, lpg2552, lpg2584	3	9	0	0	0	0	0	50	32	13	63	22	0	0	0	0	25	48	25	30		1	1	1	1	1	51	33	14	64	23	1	1	1	1	26	49	26	31		0.9176	0.379478	0.849979	0.921065	0.655136	20.7536	9.34844	8.6639	31.2576
lpg0086, lpg2552, lpg2815	3	6	0	0	0	0	0	3	0	0	1	0	0	0	0	0	4	2	3	1		1	1	1	1	1	4	1	1	2	1	1	1	1	1	5	3	4	2		0.9176	0.379478	0.849979	0.921065	0.655136	1.62774	0.283286	0.61885	0.976801
lpg0086, lpg2584	2	9	0	0	0	0	0	4	3	1	6	2	0	0	0	0	3	6	4	6		1	1	1	1	1	5	4	2	7	3	1	1	1	1	4	7	5	7		0.9176	0.379478	0.849979	0.921065	0.655136	2.03467	1.13314	1.2377	3.4188
lpg0086, lpg2692	2	10	0	0	0	0	0	8	5	1	6	6	0	0	1	0	4	10	4	6		1	1	1	1	1	9	6	2	7	7	1	1	2	1	5	11	5	7		0.9176	0.379478	0.849979	0.921065	0.655136	3.66241	1.69972	1.2377	3.4188
lpg0086, lpg2692, lpg2733	3	10	0	0	0	0	0	17	15	9	18	30	0	0	2	0	17	27	17	17		1	1	1	1	1	18	16	10	19	31	1	1	3	1	18	28	18	18		0.9176	0.379478	0.849979	0.921065	0.655136	7.32481	4.53258	6.1885	9.27961
lpg0086, lpg2733	2	9	0	0	0	0	0	5	5	2	7	3	0	0	0	0	4	8	2	3		1	1	1	1	1	6	6	3	8	4	1	1	1	1	5	9	3	4		0.9176	0.379478	0.849979	0.921065	0.655136	2.4416	1.69972	1.85655	3.9072
lpg0086, lpg2815	2	8	5	0	0	8	0	2	0	0	2	0	0	8	7	9	0	1	0	0		6	1	1	9	1	3	1	1	3	1	1	9	8	10	1	2	1	1		5.5056	0.379478	0.849979	8.28958	0.655136	1.2208	0.283286	0.61885	1.4652
lpg0086, lpg2884	2	13	0	0	0	15	0	17	12	6	16	6	20	0	19	10	16	18	10	14		1	1	1	16	1	18	13	7	17	7	21	1	20	11	17	19	11	15		0.9176	0.379478	0.849979	14.737	0.655136	7.32481	3.68272	4.33195	8.30281
lpg0086, lpg2884, lpg2885	3	2	0	0	0	0	0	0	0	0	0	0	0	0	1	1	0	0	0	0		1	1	1	1	1	1	1	1	1	1	1	1	2	2	1	1	1	1		0.9176	0.379478	0.849979	0.921065	0.655136	0.406934	0.283286	0.61885	0.4884
lpg0086, lpg2885	2	1	0	0	0	0	0	0	0	0	0	0	0	0	0	0	1	0	0	0		1	1	1	1	1	1	1	1	1	1	1	1	1	1	2	1	1	1		0.9176	0.379478	0.849979	0.921065	0.655136	0.406934	0.283286	0.61885	0.4884
lpg0086, lpg3000	2	4	0	0	0	281	0	0	0	0	0	0	1078	35	336	0	0	0	0	0		1	1	1	282	1	1	1	1	1	1	1079	36	337	1	1	1	1	1		0.9176	0.379478	0.849979	259.74	0.655136	0.406934	0.283286	0.61885	0.4884
lpg0096	1	18	14	30	14	17	11	23	31	24	16	28	25	13	19	13	7	24	7	21		15	31	15	18	12	24	32	25	17	29	26	14	20	14	8	25	8	22		13.764	11.7638	12.7497	16.5792	7.86164	9.76642	9.06516	15.4713	8.30281
lpg0096, lpg0107	2	1	0	1	0	0	0	0	0	0	0	0	0	0	0	0	0	0	0	0		1	2	1	1	1	1	1	1	1	1	1	1	1	1	1	1	1	1		0.9176	0.758956	0.849979	0.921065	0.655136	0.406934	0.283286	0.61885	0.4884
lpg0096, lpg0107, lpg0140	3	5	0	1	0	2	1	0	0	0	0	0	0	0	1	1	0	0	0	0		1	2	1	3	2	1	1	1	1	1	1	1	2	2	1	1	1	1		0.9176	0.758956	0.849979	2.76319	1.31027	0.406934	0.283286	0.61885	0.4884
lpg0096, lpg0107, lpg1525	3	1	0	0	0	0	0	0	0	0	1	0	0	0	0	0	0	0	0	0		1	1	1	1	1	1	1	1	2	1	1	1	1	1	1	1	1	1		0.9176	0.379478	0.849979	0.921065	0.655136	0.406934	0.283286	0.61885	0.976801
lpg0096, lpg0140, lpg0246, lpg2804, lpg2885	5	1	0	0	0	0	0	0	0	0	0	0	1	0	0	0	0	0	0	0		1	1	1	1	1	1	1	1	1	1	2	1	1	1	1	1	1	1		0.9176	0.379478	0.849979	0.921065	0.655136	0.406934	0.283286	0.61885	0.4884
lpg0096, lpg0140, lpg1907	3	1	0	0	0	0	0	0	0	0	0	0	0	0	0	0	1	0	0	0		1	1	1	1	1	1	1	1	1	1	1	1	1	1	2	1	1	1		0.9176	0.379478	0.849979	0.921065	0.655136	0.406934	0.283286	0.61885	0.4884
lpg0096, lpg0171	2	3	0	0	0	0	0	0	1	0	0	0	0	1	0	2	0	0	0	0		1	1	1	1	1	1	2	1	1	1	1	2	1	3	1	1	1	1		0.9176	0.379478	0.849979	0.921065	0.655136	0.406934	0.566572	0.61885	0.4884
lpg0096, lpg0171, lpg0246, lpg2806	4	1	0	0	0	0	0	0	0	0	0	3	0	0	0	0	0	0	0	0		1	1	1	1	1	1	1	1	1	4	1	1	1	1	1	1	1	1		0.9176	0.379478	0.849979	0.921065	0.655136	0.406934	0.283286	0.61885	0.4884
lpg0096, lpg0171, lpg0621	3	3	0	0	0	0	0	0	0	0	0	0	1	1	0	4	0	0	0	0		1	1	1	1	1	1	1	1	1	1	2	2	1	5	1	1	1	1		0.9176	0.379478	0.849979	0.921065	0.655136	0.406934	0.283286	0.61885	0.4884
lpg0096, lpg0171, lpg0621, lpg1661	4	7	0	5	2	0	3	0	0	0	0	0	2	6	6	13	0	0	0	0		1	6	3	1	4	1	1	1	1	1	3	7	7	14	1	1	1	1		0.9176	2.27687	2.54994	0.921065	2.62055	0.406934	0.283286	0.61885	0.4884
lpg0096, lpg0171, lpg1525, lpg1621	4	3	0	0	0	0	0	1	2	0	0	0	0	0	0	0	0	1	0	0		1	1	1	1	1	2	3	1	1	1	1	1	1	1	1	2	1	1		0.9176	0.379478	0.849979	0.921065	0.655136	0.813868	0.849858	0.61885	0.4884
lpg0096, lpg0171, lpg1525, lpg1621, lpg1701	5	1	0	0	0	0	0	0	0	0	1	0	0	0	0	0	0	0	0	0		1	1	1	1	1	1	1	1	2	1	1	1	1	1	1	1	1	1		0.9176	0.379478	0.849979	0.921065	0.655136	0.406934	0.283286	0.61885	0.976801
lpg0096, lpg0171, lpg1525, lpg1621, lpg1701, lpg2271	6	8	0	0	0	0	0	2	7	5	1	0	0	0	0	0	4	5	3	2		1	1	1	1	1	3	8	6	2	1	1	1	1	1	5	6	4	3		0.9176	0.379478	0.849979	0.921065	0.655136	1.2208	2.26629	3.7131	0.976801
lpg0096, lpg0171, lpg1525, lpg1621, lpg2271	5	3	0	0	0	0	0	0	1	1	0	0	0	0	0	0	0	1	0	0		1	1	1	1	1	1	2	2	1	1	1	1	1	1	1	2	1	1		0.9176	0.379478	0.849979	0.921065	0.655136	0.406934	0.566572	1.2377	0.4884
lpg0096, lpg0171, lpg1525, lpg1701, lpg2271	5	2	0	0	0	0	0	0	0	0	1	0	0	0	0	0	0	0	0	1		1	1	1	1	1	1	1	1	2	1	1	1	1	1	1	1	1	2		0.9176	0.379478	0.849979	0.921065	0.655136	0.406934	0.283286	0.61885	0.976801
lpg0096, lpg0171, lpg1621, lpg1701, lpg2271	5	3	0	0	0	0	0	2	1	0	0	0	0	0	0	0	0	1	0	0		1	1	1	1	1	3	2	1	1	1	1	1	1	1	1	2	1	1		0.9176	0.379478	0.849979	0.921065	0.655136	1.2208	0.566572	0.61885	0.4884
lpg0096, lpg0171, lpg1661	3	4	0	0	0	0	2	0	0	0	0	0	0	1	1	2	0	0	0	0		1	1	1	1	3	1	1	1	1	1	1	2	2	3	1	1	1	1		0.9176	0.379478	0.849979	0.921065	1.96541	0.406934	0.283286	0.61885	0.4884
lpg0096, lpg0171, lpg1701, lpg1907, lpg2271, lpg2884	6	1	0	0	0	0	0	0	0	0	0	0	0	0	0	0	1	0	0	0		1	1	1	1	1	1	1	1	1	1	1	1	1	1	2	1	1	1		0.9176	0.379478	0.849979	0.921065	0.655136	0.406934	0.283286	0.61885	0.4884
lpg0096, lpg0246	2	3	0	0	0	0	0	2	0	1	0	0	0	0	0	0	0	0	0	1		1	1	1	1	1	3	1	2	1	1	1	1	1	1	1	1	1	2		0.9176	0.379478	0.849979	0.921065	0.655136	1.2208	0.283286	1.2377	0.4884
lpg0096, lpg0246, lpg0439, lpg1702, lpg2692	5	1	0	0	1	0	0	0	0	0	0	0	0	0	0	0	0	0	0	0		1	1	2	1	1	1	1	1	1	1	1	1	1	1	1	1	1	1		0.9176	0.379478	1.69996	0.921065	0.655136	0.406934	0.283286	0.61885	0.4884
lpg0096, lpg0246, lpg2885	3	8	0	0	0	0	0	8	2	2	6	13	0	0	0	0	0	3	1	1		1	1	1	1	1	9	3	3	7	14	1	1	1	1	1	4	2	2		0.9176	0.379478	0.849979	0.921065	0.655136	3.66241	0.849858	1.85655	3.4188
lpg0096, lpg0439	2	16	0	6	1	0	2	14	43	9	11	18	1	1	1	3	3	17	4	16		1	7	2	1	3	15	44	10	12	19	2	2	2	4	4	18	5	17		0.9176	2.65634	1.69996	0.921065	1.96541	6.10401	12.4646	6.1885	5.86081
lpg0096, lpg0439, lpg1525, lpg1907, lpg2223, lpg2692, lpg3000	7	1	0	0	0	0	0	1	0	0	0	0	0	0	0	0	0	0	0	0		1	1	1	1	1	2	1	1	1	1	1	1	1	1	1	1	1	1		0.9176	0.379478	0.849979	0.921065	0.655136	0.813868	0.283286	0.61885	0.4884
lpg0096, lpg0439, lpg1907	3	10	0	0	0	0	0	125	295	165	107	210	0	0	3	0	80	215	59	115		1	1	1	1	1	126	296	166	108	211	1	1	4	1	81	216	60	116		0.9176	0.379478	0.849979	0.921065	0.655136	51.2737	83.8527	102.729	52.7473
lpg0096, lpg0439, lpg1907, lpg2223, lpg2692, lpg3000	6	1	0	0	0	0	0	0	1	0	0	0	0	0	0	0	0	0	0	0		1	1	1	1	1	1	2	1	1	1	1	1	1	1	1	1	1	1		0.9176	0.379478	0.849979	0.921065	0.655136	0.406934	0.566572	0.61885	0.4884
lpg0096, lpg0439, lpg1907, lpg2885	4	1	0	0	0	0	0	0	0	0	0	0	0	0	1	0	0	0	0	0		1	1	1	1	1	1	1	1	1	1	1	1	2	1	1	1	1	1		0.9176	0.379478	0.849979	0.921065	0.655136	0.406934	0.283286	0.61885	0.4884
lpg0096, lpg0439, lpg2692	3	8	2	20	3	1	0	0	0	0	0	0	4	10	5	6	0	0	0	0		3	21	4	2	1	1	1	1	1	1	5	11	6	7	1	1	1	1		2.7528	7.96903	3.39992	1.84213	0.655136	0.406934	0.283286	0.61885	0.4884
lpg0096, lpg0439, lpg2874	3	6	0	5	4	0	3	0	0	0	0	0	1	0	6	5	0	0	0	0		1	6	5	1	4	1	1	1	1	1	2	1	7	6	1	1	1	1		0.9176	2.27687	4.24989	0.921065	2.62055	0.406934	0.283286	0.61885	0.4884
lpg0096, lpg0518	2	7	0	0	0	0	0	2	3	2	1	1	0	0	0	0	0	4	0	1		1	1	1	1	1	3	4	3	2	2	1	1	1	1	1	5	1	2		0.9176	0.379478	0.849979	0.921065	0.655136	1.2208	1.13314	1.85655	0.976801
lpg0096, lpg0518, lpg1701	3	9	0	0	0	0	0	10	45	22	9	30	0	0	0	0	16	33	7	14		1	1	1	1	1	11	46	23	10	31	1	1	1	1	17	34	8	15		0.9176	0.379478	0.849979	0.921065	0.655136	4.47628	13.0312	14.2336	4.884
lpg0096, lpg0621	2	4	0	1	0	0	0	0	0	0	0	0	0	3	1	2	0	0	0	0		1	2	1	1	1	1	1	1	1	1	1	4	2	3	1	1	1	1		0.9176	0.758956	0.849979	0.921065	0.655136	0.406934	0.283286	0.61885	0.4884
lpg0096, lpg0621, lpg1661	3	4	2	0	1	0	0	0	0	0	0	0	1	0	0	2	0	0	0	0		3	1	2	1	1	1	1	1	1	1	2	1	1	3	1	1	1	1		2.7528	0.379478	1.69996	0.921065	0.655136	0.406934	0.283286	0.61885	0.4884
lpg0096, lpg0716, lpg2884	3	6	1	5	0	2	0	0	0	0	0	0	2	3	0	2	0	0	0	0		2	6	1	3	1	1	1	1	1	1	3	4	1	3	1	1	1	1		1.8352	2.27687	0.849979	2.76319	0.655136	0.406934	0.283286	0.61885	0.4884
lpg0096, lpg0963	2	6	0	0	0	0	0	1	4	0	0	1	0	0	0	0	2	1	0	2		1	1	1	1	1	2	5	1	1	2	1	1	1	1	3	2	1	3		0.9176	0.379478	0.849979	0.921065	0.655136	0.813868	1.41643	0.61885	0.4884
lpg0096, lpg0963, lpg1148, lpg1907, lpg2271	5	1	0	0	0	0	0	0	0	1	0	0	0	0	0	0	0	0	0	0		1	1	1	1	1	1	1	2	1	1	1	1	1	1	1	1	1	1		0.9176	0.379478	0.849979	0.921065	0.655136	0.406934	0.283286	1.2377	0.4884
lpg0096, lpg0963, lpg1527, lpg2804, lpg2884	5	1	0	0	0	0	0	0	0	1	0	0	0	0	0	0	0	0	0	0		1	1	1	1	1	1	1	2	1	1	1	1	1	1	1	1	1	1		0.9176	0.379478	0.849979	0.921065	0.655136	0.406934	0.283286	1.2377	0.4884
lpg0096, lpg0963, lpg1907	3	9	0	0	0	0	0	4	12	5	4	18	0	0	0	0	3	8	3	3		1	1	1	1	1	5	13	6	5	19	1	1	1	1	4	9	4	4		0.9176	0.379478	0.849979	0.921065	0.655136	2.03467	3.68272	3.7131	2.442
lpg0096, lpg0963, lpg1907, lpg2271	4	9	0	0	0	0	0	53	135	66	74	131	0	0	0	0	29	60	21	32		1	1	1	1	1	54	136	67	75	132	1	1	1	1	30	61	22	33		0.9176	0.379478	0.849979	0.921065	0.655136	21.9744	38.5269	41.463	36.63
lpg0096, lpg0963, lpg1907, lpg2271, lpg2692	5	1	0	0	0	0	0	0	0	0	0	0	0	0	0	0	0	0	0	1		1	1	1	1	1	1	1	1	1	1	1	1	1	1	1	1	1	2		0.9176	0.379478	0.849979	0.921065	0.655136	0.406934	0.283286	0.61885	0.4884
lpg0096, lpg0963, lpg2271	3	8	0	0	0	0	0	4	14	9	5	16	0	0	0	0	4	3	0	2		1	1	1	1	1	5	15	10	6	17	1	1	1	1	5	4	1	3		0.9176	0.379478	0.849979	0.921065	0.655136	2.03467	4.24929	6.1885	2.9304
lpg0096, lpg0963, lpg2552, lpg2804	4	1	0	0	1	0	0	0	0	0	0	0	0	0	0	0	0	0	0	0		1	1	2	1	1	1	1	1	1	1	1	1	1	1	1	1	1	1		0.9176	0.379478	1.69996	0.921065	0.655136	0.406934	0.283286	0.61885	0.4884
lpg0096, lpg0963, lpg2552, lpg2804, lpg2885	5	1	0	0	0	0	0	0	0	0	0	0	0	0	1	0	0	0	0	0		1	1	1	1	1	1	1	1	1	1	1	1	2	1	1	1	1	1		0.9176	0.379478	0.849979	0.921065	0.655136	0.406934	0.283286	0.61885	0.4884
lpg0096, lpg1099	2	1	0	0	0	0	0	0	0	0	0	0	1	0	0	0	0	0	0	0		1	1	1	1	1	1	1	1	1	1	2	1	1	1	1	1	1	1		0.9176	0.379478	0.849979	0.921065	0.655136	0.406934	0.283286	0.61885	0.4884
lpg0096, lpg1099, lpg1661, lpg1907, lpg2271, lpg2584	6	1	0	0	0	0	0	0	0	0	0	0	1	0	0	0	0	0	0	0		1	1	1	1	1	1	1	1	1	1	2	1	1	1	1	1	1	1		0.9176	0.379478	0.849979	0.921065	0.655136	0.406934	0.283286	0.61885	0.4884
lpg0096, lpg1525	2	9	0	0	0	0	0	6	10	1	2	3	0	0	0	0	3	3	3	1		1	1	1	1	1	7	11	2	3	4	1	1	1	1	4	4	4	2		0.9176	0.379478	0.849979	0.921065	0.655136	2.84854	3.11615	1.2377	1.4652
lpg0096, lpg1525, lpg1527	3	9	0	0	0	0	0	26	23	14	10	19	0	0	0	0	13	11	9	11		1	1	1	1	1	27	24	15	11	20	1	1	1	1	14	12	10	12		0.9176	0.379478	0.849979	0.921065	0.655136	10.9872	6.79887	9.28275	5.37241
lpg0096, lpg1525, lpg1527, lpg2692	4	1	0	0	0	0	0	0	0	1	0	0	0	0	0	0	0	0	0	0		1	1	1	1	1	1	1	2	1	1	1	1	1	1	1	1	1	1		0.9176	0.379478	0.849979	0.921065	0.655136	0.406934	0.283286	1.2377	0.4884
lpg0096, lpg1525, lpg1621	3	1	0	0	0	0	0	0	0	0	0	1	0	0	0	0	0	0	0	0		1	1	1	1	1	1	1	1	1	2	1	1	1	1	1	1	1	1		0.9176	0.379478	0.849979	0.921065	0.655136	0.406934	0.283286	0.61885	0.4884
lpg0096, lpg1525, lpg1621, lpg1701, lpg2271	5	2	0	0	0	0	0	0	2	1	0	0	0	0	0	0	0	0	0	0		1	1	1	1	1	1	3	2	1	1	1	1	1	1	1	1	1	1		0.9176	0.379478	0.849979	0.921065	0.655136	0.406934	0.849858	1.2377	0.4884
lpg0096, lpg1527	2	8	0	0	0	0	0	3	2	4	3	5	0	0	0	0	1	2	0	2		1	1	1	1	1	4	3	5	4	6	1	1	1	1	2	3	1	3		0.9176	0.379478	0.849979	0.921065	0.655136	1.62774	0.849858	3.09425	1.9536
lpg0096, lpg1621, lpg1661, lpg1907	4	1	0	0	0	0	0	0	0	0	0	0	0	0	0	1	0	0	0	0		1	1	1	1	1	1	1	1	1	1	1	1	1	2	1	1	1	1		0.9176	0.379478	0.849979	0.921065	0.655136	0.406934	0.283286	0.61885	0.4884
lpg0096, lpg1621, lpg1701, lpg2271	4	1	0	0	0	0	0	0	1	0	0	0	0	0	0	0	0	0	0	0		1	1	1	1	1	1	2	1	1	1	1	1	1	1	1	1	1	1		0.9176	0.379478	0.849979	0.921065	0.655136	0.406934	0.566572	0.61885	0.4884
lpg0096, lpg1661	2	9	8	28	11	22	3	0	0	0	0	0	52	13	30	14	0	0	0	0		9	29	12	23	4	1	1	1	1	1	53	14	31	15	1	1	1	1		8.2584	11.0049	10.1997	21.1845	2.62055	0.406934	0.283286	0.61885	0.4884
lpg0096, lpg1661, lpg1907	3	11	102	279	131	238	44	0	0	0	0	0	446	94	378	109	1	0	1	0		103	280	132	239	45	1	1	1	1	1	447	95	379	110	2	1	2	1		94.5128	106.254	112.197	220.134	29.4811	0.406934	0.283286	0.61885	0.4884
lpg0096, lpg1661, lpg1907, lpg2223, lpg2552, lpg2888, lpg3000	7	1	0	0	1	0	0	0	0	0	0	0	0	0	0	0	0	0	0	0		1	1	2	1	1	1	1	1	1	1	1	1	1	1	1	1	1	1		0.9176	0.379478	1.69996	0.921065	0.655136	0.406934	0.283286	0.61885	0.4884
lpg0096, lpg1661, lpg1907, lpg2223, lpg2815	5	1	0	0	0	0	0	0	0	0	0	0	0	0	0	1	0	0	0	0		1	1	1	1	1	1	1	1	1	1	1	1	1	2	1	1	1	1		0.9176	0.379478	0.849979	0.921065	0.655136	0.406934	0.283286	0.61885	0.4884
lpg0096, lpg1661, lpg2223	3	1	0	0	1	0	0	0	0	0	0	0	0	0	0	0	0	0	0	0		1	1	2	1	1	1	1	1	1	1	1	1	1	1	1	1	1	1		0.9176	0.379478	1.69996	0.921065	0.655136	0.406934	0.283286	0.61885	0.4884
lpg0096, lpg1689	2	5	2	3	1	0	0	0	0	0	0	0	0	1	0	4	0	0	0	0		3	4	2	1	1	1	1	1	1	1	1	2	1	5	1	1	1	1		2.7528	1.51791	1.69996	0.921065	0.655136	0.406934	0.283286	0.61885	0.4884
lpg0096, lpg1701	2	7	0	0	0	0	0	2	4	1	2	1	0	0	0	0	0	4	1	0		1	1	1	1	1	3	5	2	3	2	1	1	1	1	1	5	2	1		0.9176	0.379478	0.849979	0.921065	0.655136	1.2208	1.41643	1.2377	1.4652
lpg0096, lpg1907	2	18	26	69	26	30	7	17	40	19	14	29	90	18	76	22	6	27	17	10		27	70	27	31	8	18	41	20	15	30	91	19	77	23	7	28	18	11		24.7752	26.5634	22.9494	28.553	5.24109	7.32481	11.6147	12.377	7.32601
lpg0096, lpg1907, lpg2223, lpg2815	4	2	0	0	0	1	0	0	0	0	0	0	0	0	0	1	0	0	0	0		1	1	1	2	1	1	1	1	1	1	1	1	1	2	1	1	1	1		0.9176	0.379478	0.849979	1.84213	0.655136	0.406934	0.283286	0.61885	0.4884
lpg0096, lpg1907, lpg2271	3	9	0	0	0	0	0	2	12	7	7	18	0	0	0	0	2	5	3	3		1	1	1	1	1	3	13	8	8	19	1	1	1	1	3	6	4	4		0.9176	0.379478	0.849979	0.921065	0.655136	1.2208	3.68272	4.9508	3.9072
lpg0096, lpg1959, lpg2815, lpg2874	4	1	1	0	0	0	0	0	0	0	0	0	0	0	0	0	0	0	0	0		2	1	1	1	1	1	1	1	1	1	1	1	1	1	1	1	1	1		1.8352	0.379478	0.849979	0.921065	0.655136	0.406934	0.283286	0.61885	0.4884
lpg0096, lpg1959, lpg2874	3	2	1	0	0	0	0	0	0	0	0	0	0	1	0	0	0	0	0	0		2	1	1	1	1	1	1	1	1	1	1	2	1	1	1	1	1	1		1.8352	0.379478	0.849979	0.921065	0.655136	0.406934	0.283286	0.61885	0.4884
lpg0096, lpg2223	2	1	0	0	0	1	0	0	0	0	0	0	0	0	0	0	0	0	0	0		1	1	1	2	1	1	1	1	1	1	1	1	1	1	1	1	1	1		0.9176	0.379478	0.849979	1.84213	0.655136	0.406934	0.283286	0.61885	0.4884
lpg0096, lpg2244	2	6	1	2	0	2	3	0	0	0	0	0	0	0	2	6	0	0	0	0		2	3	1	3	4	1	1	1	1	1	1	1	3	7	1	1	1	1		1.8352	1.13843	0.849979	2.76319	2.62055	0.406934	0.283286	0.61885	0.4884
lpg0096, lpg2244, lpg2584	3	9	1	7	2	9	9	0	0	0	0	0	2	1	6	17	0	0	0	0		2	8	3	10	10	1	1	1	1	1	3	2	7	18	1	1	1	1		1.8352	3.03582	2.54994	9.21065	6.55136	0.406934	0.283286	0.61885	0.4884
lpg0096, lpg2271	2	7	0	0	0	0	0	1	3	1	0	3	0	0	0	0	1	1	1	0		1	1	1	1	1	2	4	2	1	4	1	1	1	1	2	2	2	1		0.9176	0.379478	0.849979	0.921065	0.655136	0.813868	1.13314	1.2377	0.4884
lpg0096, lpg2552	2	6	0	0	0	0	0	6	0	0	9	0	0	0	0	0	5	7	6	4		1	1	1	1	1	7	1	1	10	1	1	1	1	1	6	8	7	5		0.9176	0.379478	0.849979	0.921065	0.655136	2.84854	0.283286	0.61885	4.884
lpg0096, lpg2552, lpg2815	3	6	0	0	0	0	0	26	0	0	25	0	0	0	0	0	25	21	10	18		1	1	1	1	1	27	1	1	26	1	1	1	1	1	26	22	11	19		0.9176	0.379478	0.849979	0.921065	0.655136	10.9872	0.283286	0.61885	12.6984
lpg0096, lpg2584	2	2	0	1	0	0	0	0	0	0	0	0	0	0	0	1	0	0	0	0		1	2	1	1	1	1	1	1	1	1	1	1	1	2	1	1	1	1		0.9176	0.758956	0.849979	0.921065	0.655136	0.406934	0.283286	0.61885	0.4884
lpg0096, lpg2692	2	5	0	3	2	1	0	0	0	0	0	0	0	3	0	2	0	0	0	0		1	4	3	2	1	1	1	1	1	1	1	4	1	3	1	1	1	1		0.9176	1.51791	2.54994	1.84213	0.655136	0.406934	0.283286	0.61885	0.4884
lpg0096, lpg2804	2	8	14	6	2	9	0	0	0	0	0	0	41	5	9	4	0	0	0	0		15	7	3	10	1	1	1	1	1	1	42	6	10	5	1	1	1	1		13.764	2.65634	2.54994	9.21065	0.655136	0.406934	0.283286	0.61885	0.4884
lpg0096, lpg2804, lpg2885	3	10	68	31	18	127	10	0	0	0	0	0	508	24	100	26	0	0	1	0		69	32	19	128	11	1	1	1	1	1	509	25	101	27	1	1	2	1		63.3144	12.1433	16.1496	117.896	7.2065	0.406934	0.283286	0.61885	0.4884
lpg0096, lpg2806	2	1	0	0	0	0	0	0	0	0	1	0	0	0	0	0	0	0	0	0		1	1	1	1	1	1	1	1	2	1	1	1	1	1	1	1	1	1		0.9176	0.379478	0.849979	0.921065	0.655136	0.406934	0.283286	0.61885	0.976801
lpg0096, lpg2815	2	6	0	0	0	0	0	8	0	0	5	0	0	0	0	0	1	9	2	1		1	1	1	1	1	9	1	1	6	1	1	1	1	1	2	10	3	2		0.9176	0.379478	0.849979	0.921065	0.655136	3.66241	0.283286	0.61885	2.9304
lpg0096, lpg2815, lpg2874	3	6	0	0	0	0	0	8	0	0	6	0	0	0	0	0	1	3	3	1		1	1	1	1	1	9	1	1	7	1	1	1	1	1	2	4	4	2		0.9176	0.379478	0.849979	0.921065	0.655136	3.66241	0.283286	0.61885	3.4188
lpg0096, lpg2815, lpg2874, lpg2884	4	6	0	0	0	0	0	19	0	0	33	0	0	0	0	0	17	27	23	16		1	1	1	1	1	20	1	1	34	1	1	1	1	1	18	28	24	17		0.9176	0.379478	0.849979	0.921065	0.655136	8.13868	0.283286	0.61885	16.6056
lpg0096, lpg2815, lpg2884	3	4	0	0	0	0	0	2	0	0	1	0	0	0	0	0	2	0	0	3		1	1	1	1	1	3	1	1	2	1	1	1	1	1	3	1	1	4		0.9176	0.379478	0.849979	0.921065	0.655136	1.2208	0.283286	0.61885	0.976801
lpg0096, lpg2815, lpg2888	3	6	0	0	0	0	0	9	0	0	14	0	0	0	0	0	9	9	4	2		1	1	1	1	1	10	1	1	15	1	1	1	1	1	10	10	5	3		0.9176	0.379478	0.849979	0.921065	0.655136	4.06934	0.283286	0.61885	7.32601
lpg0096, lpg2874	2	8	0	1	0	0	1	2	0	0	0	0	0	0	1	2	1	1	2	0		1	2	1	1	2	3	1	1	1	1	1	1	2	3	2	2	3	1		0.9176	0.758956	0.849979	0.921065	1.31027	1.2208	0.283286	0.61885	0.4884
lpg0096, lpg2874, lpg2884	3	7	0	0	0	0	0	6	0	1	6	0	0	0	0	0	7	5	9	6		1	1	1	1	1	7	1	2	7	1	1	1	1	1	8	6	10	7		0.9176	0.379478	0.849979	0.921065	0.655136	2.84854	0.283286	1.2377	3.4188
lpg0096, lpg2884	2	5	0	0	0	0	0	5	0	0	3	0	1	0	0	0	0	2	1	0		1	1	1	1	1	6	1	1	4	1	2	1	1	1	1	3	2	1		0.9176	0.379478	0.849979	0.921065	0.655136	2.4416	0.283286	0.61885	1.9536
lpg0096, lpg2885	2	12	7	7	2	9	1	1	1	0	1	0	60	4	13	4	0	0	0	0		8	8	3	10	2	2	2	1	2	1	61	5	14	5	1	1	1	1		7.3408	3.03582	2.54994	9.21065	1.31027	0.813868	0.566572	0.61885	0.976801
lpg0096, lpg2888	2	3	0	0	0	0	0	7	0	0	5	0	0	0	0	0	5	0	0	0		1	1	1	1	1	8	1	1	6	1	1	1	1	1	6	1	1	1		0.9176	0.379478	0.849979	0.921065	0.655136	3.25547	0.283286	0.61885	2.9304
lpg0107	1	18	9	39	14	9	1	82	190	98	64	134	6	11	5	27	37	114	39	73		10	40	15	10	2	83	191	99	65	135	7	12	6	28	38	115	40	74		9.176	15.1791	12.7497	9.21065	1.31027	33.7755	54.1076	61.2662	31.746
lpg0107, lpg0140	2	1	0	0	0	1	0	0	0	0	0	0	0	0	0	0	0	0	0	0		1	1	1	2	1	1	1	1	1	1	1	1	1	1	1	1	1	1		0.9176	0.379478	0.849979	1.84213	0.655136	0.406934	0.283286	0.61885	0.4884
lpg0107, lpg0140, lpg1701	3	1	0	1	0	0	0	0	0	0	0	0	0	0	0	0	0	0	0	0		1	2	1	1	1	1	1	1	1	1	1	1	1	1	1	1	1	1		0.9176	0.758956	0.849979	0.921065	0.655136	0.406934	0.283286	0.61885	0.4884
lpg0107, lpg0140, lpg2884	3	1	0	1	0	0	0	0	0	0	0	0	0	0	0	0	0	0	0	0		1	2	1	1	1	1	1	1	1	1	1	1	1	1	1	1	1	1		0.9176	0.758956	0.849979	0.921065	0.655136	0.406934	0.283286	0.61885	0.4884
lpg0107, lpg0140, lpg2884, lpg3000	4	4	2	1	0	1	0	0	0	0	0	0	0	0	1	0	0	0	0	0		3	2	1	2	1	1	1	1	1	1	1	1	2	1	1	1	1	1		2.7528	0.758956	0.849979	1.84213	0.655136	0.406934	0.283286	0.61885	0.4884
lpg0107, lpg0140, lpg3000	3	1	0	0	0	0	1	0	0	0	0	0	0	0	0	0	0	0	0	0		1	1	1	1	2	1	1	1	1	1	1	1	1	1	1	1	1	1		0.9176	0.379478	0.849979	0.921065	1.31027	0.406934	0.283286	0.61885	0.4884
lpg0107, lpg0171	2	13	0	2	1	0	0	16	23	12	21	20	0	2	0	2	6	19	5	9		1	3	2	1	1	17	24	13	22	21	1	3	1	3	7	20	6	10		0.9176	1.13843	1.69996	0.921065	0.655136	6.91788	6.79887	8.04505	10.7448
lpg0107, lpg0171, lpg0404, lpg0518, lpg2692	5	1	0	0	0	0	0	1	0	0	0	0	0	0	0	0	0	0	0	0		1	1	1	1	1	2	1	1	1	1	1	1	1	1	1	1	1	1		0.9176	0.379478	0.849979	0.921065	0.655136	0.813868	0.283286	0.61885	0.4884
lpg0107, lpg0171, lpg1689	3	9	0	0	0	0	0	7	12	10	3	8	0	0	0	0	4	10	5	10		1	1	1	1	1	8	13	11	4	9	1	1	1	1	5	11	6	11		0.9176	0.379478	0.849979	0.921065	0.655136	3.25547	3.68272	6.80735	1.9536
lpg0107, lpg0171, lpg1689, lpg1776	4	10	0	0	0	0	0	77	196	86	60	118	0	0	1	0	47	128	57	77		1	1	1	1	1	78	197	87	61	119	1	1	2	1	48	129	58	78		0.9176	0.379478	0.849979	0.921065	0.655136	31.7409	55.8074	53.84	29.7924
lpg0107, lpg0171, lpg1702	3	3	0	0	0	0	0	1	0	0	0	0	0	0	0	0	1	2	0	0		1	1	1	1	1	2	1	1	1	1	1	1	1	1	2	3	1	1		0.9176	0.379478	0.849979	0.921065	0.655136	0.813868	0.283286	0.61885	0.4884
lpg0107, lpg0171, lpg1702, lpg2815	4	5	0	0	0	0	0	4	0	0	2	0	0	0	0	0	0	3	1	1		1	1	1	1	1	5	1	1	3	1	1	1	1	1	1	4	2	2		0.9176	0.379478	0.849979	0.921065	0.655136	2.03467	0.283286	0.61885	1.4652
lpg0107, lpg0171, lpg1776	3	10	0	0	0	0	0	2	13	6	3	6	0	0	1	0	1	10	2	10		1	1	1	1	1	3	14	7	4	7	1	1	2	1	2	11	3	11		0.9176	0.379478	0.849979	0.921065	0.655136	1.2208	3.96601	4.33195	1.9536
lpg0107, lpg0171, lpg1776, lpg2884	4	4	0	0	0	2	2	0	0	0	0	0	2	0	0	1	0	0	0	0		1	1	1	3	3	1	1	1	1	1	3	1	1	2	1	1	1	1		0.9176	0.379478	0.849979	2.76319	1.96541	0.406934	0.283286	0.61885	0.4884
lpg0107, lpg0171, lpg1776, lpg2884, lpg2885	5	9	8	9	7	10	2	0	0	0	0	0	11	7	18	17	0	0	0	0		9	10	8	11	3	1	1	1	1	1	12	8	19	18	1	1	1	1		8.2584	3.79478	6.79983	10.1317	1.96541	0.406934	0.283286	0.61885	0.4884
lpg0107, lpg0171, lpg1776, lpg2885	4	4	0	2	0	1	0	0	0	0	0	0	2	0	0	5	0	0	0	0		1	3	1	2	1	1	1	1	1	1	3	1	1	6	1	1	1	1		0.9176	1.13843	0.849979	1.84213	0.655136	0.406934	0.283286	0.61885	0.4884
lpg0107, lpg0171, lpg2584	3	9	2	7	2	4	3	0	0	0	0	0	2	1	2	11	0	0	0	0		3	8	3	5	4	1	1	1	1	1	3	2	3	12	1	1	1	1		2.7528	3.03582	2.54994	4.60532	2.62055	0.406934	0.283286	0.61885	0.4884
lpg0107, lpg0171, lpg2884	3	1	1	0	0	0	0	0	0	0	0	0	0	0	0	0	0	0	0	0		2	1	1	1	1	1	1	1	1	1	1	1	1	1	1	1	1	1		1.8352	0.379478	0.849979	0.921065	0.655136	0.406934	0.283286	0.61885	0.4884
lpg0107, lpg0171, lpg2884, lpg2885	4	5	1	1	0	0	0	0	0	0	0	0	1	0	3	1	0	0	0	0		2	2	1	1	1	1	1	1	1	1	2	1	4	2	1	1	1	1		1.8352	0.758956	0.849979	0.921065	0.655136	0.406934	0.283286	0.61885	0.4884
lpg0107, lpg0246	2	9	0	0	0	0	0	5	7	5	6	5	0	0	0	0	3	6	4	7		1	1	1	1	1	6	8	6	7	6	1	1	1	1	4	7	5	8		0.9176	0.379478	0.849979	0.921065	0.655136	2.4416	2.26629	3.7131	3.4188
lpg0107, lpg0246, lpg0404, lpg0439, lpg0518, lpg1525, lpg1701, lpg2692	8	1	0	0	0	0	0	1	0	0	0	0	0	0	0	0	0	0	0	0		1	1	1	1	1	2	1	1	1	1	1	1	1	1	1	1	1	1		0.9176	0.379478	0.849979	0.921065	0.655136	0.813868	0.283286	0.61885	0.4884
lpg0107, lpg0246, lpg0518	3	10	0	0	0	0	0	44	99	48	35	59	0	0	1	0	24	98	25	35		1	1	1	1	1	45	100	49	36	60	1	1	2	1	25	99	26	36		0.9176	0.379478	0.849979	0.921065	0.655136	18.312	28.3286	30.3237	17.5824
lpg0107, lpg0246, lpg2815	3	5	0	0	0	0	0	6	0	0	4	0	0	0	0	0	0	4	1	1		1	1	1	1	1	7	1	1	5	1	1	1	1	1	1	5	2	2		0.9176	0.379478	0.849979	0.921065	0.655136	2.84854	0.283286	0.61885	2.442
lpg0107, lpg0404	2	3	0	0	0	0	0	3	0	0	1	0	0	0	0	0	2	0	0	0		1	1	1	1	1	4	1	1	2	1	1	1	1	1	3	1	1	1		0.9176	0.379478	0.849979	0.921065	0.655136	1.62774	0.283286	0.61885	0.976801
lpg0107, lpg0404, lpg1137	3	7	0	0	0	0	0	6	2	0	2	0	0	0	0	0	1	1	1	1		1	1	1	1	1	7	3	1	3	1	1	1	1	1	2	2	2	2		0.9176	0.379478	0.849979	0.921065	0.655136	2.84854	0.849858	0.61885	1.4652
lpg0107, lpg0404, lpg1137, lpg2733	4	7	0	0	0	0	0	5	1	0	2	0	0	0	0	0	6	3	1	4		1	1	1	1	1	6	2	1	3	1	1	1	1	1	7	4	2	5		0.9176	0.379478	0.849979	0.921065	0.655136	2.4416	0.566572	0.61885	1.4652
lpg0107, lpg0404, lpg2584	3	4	0	0	0	0	0	0	0	0	1	0	0	0	0	0	0	2	1	1		1	1	1	1	1	1	1	1	2	1	1	1	1	1	1	3	2	2		0.9176	0.379478	0.849979	0.921065	0.655136	0.406934	0.283286	0.61885	0.976801
lpg0107, lpg0404, lpg2584, lpg2733	4	7	0	0	0	0	0	4	1	0	2	0	0	0	0	0	2	1	1	2		1	1	1	1	1	5	2	1	3	1	1	1	1	1	3	2	2	3		0.9176	0.379478	0.849979	0.921065	0.655136	2.03467	0.566572	0.61885	1.4652
lpg0107, lpg0404, lpg2733	3	4	0	0	0	0	0	1	0	0	2	0	0	0	0	0	1	1	0	0		1	1	1	1	1	2	1	1	3	1	1	1	1	1	2	2	1	1		0.9176	0.379478	0.849979	0.921065	0.655136	0.813868	0.283286	0.61885	1.4652
lpg0107, lpg0439, lpg1148, lpg1959	4	1	0	0	0	0	0	1	0	0	0	0	0	0	0	0	0	0	0	0		1	1	1	1	1	2	1	1	1	1	1	1	1	1	1	1	1	1		0.9176	0.379478	0.849979	0.921065	0.655136	0.813868	0.283286	0.61885	0.4884
lpg0107, lpg0439, lpg3000	3	2	1	0	1	0	0	0	0	0	0	0	0	0	0	0	0	0	0	0		2	1	2	1	1	1	1	1	1	1	1	1	1	1	1	1	1	1		1.8352	0.379478	1.69996	0.921065	0.655136	0.406934	0.283286	0.61885	0.4884
lpg0107, lpg0518	2	9	0	0	0	0	0	32	77	30	23	58	0	0	0	0	16	34	14	25		1	1	1	1	1	33	78	31	24	59	1	1	1	1	17	35	15	26		0.9176	0.379478	0.849979	0.921065	0.655136	13.4288	22.0963	19.1844	11.7216
lpg0107, lpg0518, lpg1099, lpg1148, lpg2692	5	1	0	0	0	0	0	0	0	0	0	0	0	0	0	0	0	0	1	0		1	1	1	1	1	1	1	1	1	1	1	1	1	1	1	1	2	1		0.9176	0.379478	0.849979	0.921065	0.655136	0.406934	0.283286	0.61885	0.4884
lpg0107, lpg0518, lpg1525, lpg2223, lpg2692, lpg3000	6	1	0	0	0	0	0	0	0	0	0	0	0	0	0	0	0	0	1	0		1	1	1	1	1	1	1	1	1	1	1	1	1	1	1	1	2	1		0.9176	0.379478	0.849979	0.921065	0.655136	0.406934	0.283286	0.61885	0.4884
lpg0107, lpg0518, lpg1661	3	1	0	0	0	0	0	0	0	0	0	0	0	0	0	2	0	0	0	0		1	1	1	1	1	1	1	1	1	1	1	1	1	3	1	1	1	1		0.9176	0.379478	0.849979	0.921065	0.655136	0.406934	0.283286	0.61885	0.4884
lpg0107, lpg0518, lpg1661, lpg2552	4	4	1	0	0	0	0	0	0	0	0	0	1	0	1	1	0	0	0	0		2	1	1	1	1	1	1	1	1	1	2	1	2	2	1	1	1	1		1.8352	0.379478	0.849979	0.921065	0.655136	0.406934	0.283286	0.61885	0.4884
lpg0107, lpg0518, lpg1701, lpg1907, lpg2271, lpg2552, lpg2692, lpg3000	8	1	0	0	0	0	0	0	1	0	0	0	0	0	0	0	0	0	0	0		1	1	1	1	1	1	2	1	1	1	1	1	1	1	1	1	1	1		0.9176	0.379478	0.849979	0.921065	0.655136	0.406934	0.566572	0.61885	0.4884
lpg0107, lpg0518, lpg1907	3	1	0	0	0	0	0	0	0	0	0	0	0	0	0	0	1	0	0	0		1	1	1	1	1	1	1	1	1	1	1	1	1	1	2	1	1	1		0.9176	0.379478	0.849979	0.921065	0.655136	0.406934	0.283286	0.61885	0.4884
lpg0107, lpg0518, lpg2552	3	1	0	0	0	0	0	0	0	0	0	0	0	1	0	0	0	0	0	0		1	1	1	1	1	1	1	1	1	1	1	2	1	1	1	1	1	1		0.9176	0.379478	0.849979	0.921065	0.655136	0.406934	0.283286	0.61885	0.4884
lpg0107, lpg0518, lpg2692	3	10	0	0	0	0	0	105	283	156	62	182	0	0	4	0	51	160	50	95		1	1	1	1	1	106	284	157	63	183	1	1	5	1	52	161	51	96		0.9176	0.379478	0.849979	0.921065	0.655136	43.135	80.4533	97.1595	30.7692
lpg0107, lpg0518, lpg2692, lpg2884, lpg3000	5	1	0	0	0	0	0	1	0	0	0	0	0	0	0	0	0	0	0	0		1	1	1	1	1	2	1	1	1	1	1	1	1	1	1	1	1	1		0.9176	0.379478	0.849979	0.921065	0.655136	0.813868	0.283286	0.61885	0.4884
lpg0107, lpg0621, lpg1907	3	1	0	0	0	0	0	0	1	0	0	0	0	0	0	0	0	0	0	0		1	1	1	1	1	1	2	1	1	1	1	1	1	1	1	1	1	1		0.9176	0.379478	0.849979	0.921065	0.655136	0.406934	0.566572	0.61885	0.4884
lpg0107, lpg0879	2	3	0	0	0	0	0	0	0	0	2	0	0	0	0	0	2	1	0	0		1	1	1	1	1	1	1	1	3	1	1	1	1	1	3	2	1	1		0.9176	0.379478	0.849979	0.921065	0.655136	0.406934	0.283286	0.61885	1.4652
lpg0107, lpg0879, lpg1661	3	6	0	0	0	0	0	6	0	0	4	0	0	0	0	0	2	7	3	5		1	1	1	1	1	7	1	1	5	1	1	1	1	1	3	8	4	6		0.9176	0.379478	0.849979	0.921065	0.655136	2.84854	0.283286	0.61885	2.442
lpg0107, lpg0879, lpg1661, lpg2815	4	6	0	0	0	0	0	14	0	0	15	0	0	0	0	0	11	18	9	10		1	1	1	1	1	15	1	1	16	1	1	1	1	1	12	19	10	11		0.9176	0.379478	0.849979	0.921065	0.655136	6.10401	0.283286	0.61885	7.81441
lpg0107, lpg0879, lpg2815	3	4	0	0	0	0	0	3	0	0	2	0	0	0	0	0	0	3	0	1		1	1	1	1	1	4	1	1	3	1	1	1	1	1	1	4	1	2		0.9176	0.379478	0.849979	0.921065	0.655136	1.62774	0.283286	0.61885	1.4652
lpg0107, lpg0963	2	8	0	0	0	0	0	3	9	3	1	3	0	0	0	0	3	3	0	2		1	1	1	1	1	4	10	4	2	4	1	1	1	1	4	4	1	3		0.9176	0.379478	0.849979	0.921065	0.655136	1.62774	2.83286	2.4754	0.976801
lpg0107, lpg0963, lpg1527, lpg1661, lpg1702, lpg2884	6	1	0	0	0	0	0	0	0	0	0	0	0	0	0	0	1	0	0	0		1	1	1	1	1	1	1	1	1	1	1	1	1	1	2	1	1	1		0.9176	0.379478	0.849979	0.921065	0.655136	0.406934	0.283286	0.61885	0.4884
lpg0107, lpg0963, lpg1527, lpg2692, lpg2804, lpg2884	6	1	0	0	0	0	0	0	0	0	0	0	0	0	0	0	0	0	1	0		1	1	1	1	1	1	1	1	1	1	1	1	1	1	1	1	2	1		0.9176	0.379478	0.849979	0.921065	0.655136	0.406934	0.283286	0.61885	0.4884
lpg0107, lpg0963, lpg1702	3	9	0	0	0	0	0	36	88	46	26	43	0	0	0	0	12	55	23	43		1	1	1	1	1	37	89	47	27	44	1	1	1	1	13	56	24	44		0.9176	0.379478	0.849979	0.921065	0.655136	15.0566	25.2125	29.086	13.1868
lpg0107, lpg1099	2	2	0	1	1	0	0	0	0	0	0	0	0	0	0	0	0	0	0	0		1	2	2	1	1	1	1	1	1	1	1	1	1	1	1	1	1	1		0.9176	0.758956	1.69996	0.921065	0.655136	0.406934	0.283286	0.61885	0.4884
lpg0107, lpg1099, lpg1527	3	3	0	0	1	0	0	0	0	0	0	0	1	0	0	2	0	0	0	0		1	1	2	1	1	1	1	1	1	1	2	1	1	3	1	1	1	1		0.9176	0.379478	1.69996	0.921065	0.655136	0.406934	0.283286	0.61885	0.4884
lpg0107, lpg1099, lpg1527, lpg1959	4	8	1	6	1	3	8	0	0	0	0	0	1	3	0	8	0	0	0	0		2	7	2	4	9	1	1	1	1	1	2	4	1	9	1	1	1	1		1.8352	2.65634	1.69996	3.68426	5.89623	0.406934	0.283286	0.61885	0.4884
lpg0107, lpg1099, lpg1527, lpg1959, lpg2733	5	9	3	14	8	9	7	0	0	0	0	0	4	5	9	23	0	0	0	0		4	15	9	10	8	1	1	1	1	1	5	6	10	24	1	1	1	1		3.6704	5.69217	7.64981	9.21065	5.24109	0.406934	0.283286	0.61885	0.4884
lpg0107, lpg1099, lpg1527, lpg2733	4	5	0	2	1	0	0	0	0	0	0	0	1	1	0	7	0	0	0	0		1	3	2	1	1	1	1	1	1	1	2	2	1	8	1	1	1	1		0.9176	1.13843	1.69996	0.921065	0.655136	0.406934	0.283286	0.61885	0.4884
lpg0107, lpg1099, lpg1959	3	3	0	2	2	0	0	0	0	0	0	0	0	0	0	2	0	0	0	0		1	3	3	1	1	1	1	1	1	1	1	1	1	3	1	1	1	1		0.9176	1.13843	2.54994	0.921065	0.655136	0.406934	0.283286	0.61885	0.4884
lpg0107, lpg1099, lpg1959, lpg2733	4	8	0	4	1	1	2	0	0	0	0	0	2	2	2	2	0	0	0	0		1	5	2	2	3	1	1	1	1	1	3	3	3	3	1	1	1	1		0.9176	1.89739	1.69996	1.84213	1.96541	0.406934	0.283286	0.61885	0.4884
lpg0107, lpg1099, lpg2271	3	1	0	0	0	0	1	0	0	0	0	0	0	0	0	0	0	0	0	0		1	1	1	1	2	1	1	1	1	1	1	1	1	1	1	1	1	1		0.9176	0.379478	0.849979	0.921065	1.31027	0.406934	0.283286	0.61885	0.4884
lpg0107, lpg1099, lpg2271, lpg2552	4	7	3	2	1	0	0	0	0	0	0	0	1	2	1	3	0	0	0	0		4	3	2	1	1	1	1	1	1	1	2	3	2	4	1	1	1	1		3.6704	1.13843	1.69996	0.921065	0.655136	0.406934	0.283286	0.61885	0.4884
lpg0107, lpg1099, lpg2271, lpg2552, lpg2733	5	9	3	8	2	1	3	0	0	0	0	0	3	2	5	15	0	0	0	0		4	9	3	2	4	1	1	1	1	1	4	3	6	16	1	1	1	1		3.6704	3.4153	2.54994	1.84213	2.62055	0.406934	0.283286	0.61885	0.4884
lpg0107, lpg1099, lpg2271, lpg2733	4	4	0	1	0	0	1	0	0	0	0	0	0	1	0	1	0	0	0	0		1	2	1	1	2	1	1	1	1	1	1	2	1	2	1	1	1	1		0.9176	0.758956	0.849979	0.921065	1.31027	0.406934	0.283286	0.61885	0.4884
lpg0107, lpg1099, lpg2552	3	2	0	0	0	0	0	0	0	0	0	0	1	0	0	1	0	0	0	0		1	1	1	1	1	1	1	1	1	1	2	1	1	2	1	1	1	1		0.9176	0.379478	0.849979	0.921065	0.655136	0.406934	0.283286	0.61885	0.4884
lpg0107, lpg1099, lpg2552, lpg2733	4	5	0	0	0	1	2	0	0	0	0	0	2	0	1	1	0	0	0	0		1	1	1	2	3	1	1	1	1	1	3	1	2	2	1	1	1	1		0.9176	0.379478	0.849979	1.84213	1.96541	0.406934	0.283286	0.61885	0.4884
lpg0107, lpg1099, lpg2733	3	2	0	0	1	0	0	0	0	0	0	0	0	1	0	0	0	0	0	0		1	1	2	1	1	1	1	1	1	1	1	2	1	1	1	1	1	1		0.9176	0.379478	1.69996	0.921065	0.655136	0.406934	0.283286	0.61885	0.4884
lpg0107, lpg1137	2	2	0	0	0	0	2	0	0	0	0	0	0	0	0	1	0	0	0	0		1	1	1	1	3	1	1	1	1	1	1	1	1	2	1	1	1	1		0.9176	0.379478	0.849979	0.921065	1.96541	0.406934	0.283286	0.61885	0.4884
lpg0107, lpg1137, lpg2552	3	5	0	3	0	1	1	0	0	0	0	0	0	2	0	6	0	0	0	0		1	4	1	2	2	1	1	1	1	1	1	3	1	7	1	1	1	1		0.9176	1.51791	0.849979	1.84213	1.31027	0.406934	0.283286	0.61885	0.4884
lpg0107, lpg1137, lpg2552, lpg2584	4	9	3	39	13	5	12	0	0	0	0	0	15	11	18	67	0	0	0	0		4	40	14	6	13	1	1	1	1	1	16	12	19	68	1	1	1	1		3.6704	15.1791	11.8997	5.52639	8.51677	0.406934	0.283286	0.61885	0.4884
lpg0107, lpg1137, lpg2552, lpg2584, lpg2692	5	1	0	1	0	0	0	0	0	0	0	0	0	0	0	0	0	0	0	0		1	2	1	1	1	1	1	1	1	1	1	1	1	1	1	1	1	1		0.9176	0.758956	0.849979	0.921065	0.655136	0.406934	0.283286	0.61885	0.4884
lpg0107, lpg1137, lpg2584	3	8	1	2	1	1	1	0	0	0	0	0	0	2	3	14	0	0	0	0		2	3	2	2	2	1	1	1	1	1	1	3	4	15	1	1	1	1		1.8352	1.13843	1.69996	1.84213	1.31027	0.406934	0.283286	0.61885	0.4884
lpg0107, lpg1137, lpg2733	3	3	0	0	0	0	0	2	0	0	1	0	0	0	0	0	0	1	0	0		1	1	1	1	1	3	1	1	2	1	1	1	1	1	1	2	1	1		0.9176	0.379478	0.849979	0.921065	0.655136	1.2208	0.283286	0.61885	0.976801
lpg0107, lpg1137, lpg2874, lpg2885	4	5	2	1	0	0	0	0	0	0	0	0	1	1	1	0	0	0	0	0		3	2	1	1	1	1	1	1	1	1	2	2	2	1	1	1	1	1		2.7528	0.758956	0.849979	0.921065	0.655136	0.406934	0.283286	0.61885	0.4884
lpg0107, lpg1148	2	8	0	0	0	0	0	2	13	5	2	7	0	0	0	0	3	8	0	5		1	1	1	1	1	3	14	6	3	8	1	1	1	1	4	9	1	6		0.9176	0.379478	0.849979	0.921065	0.655136	1.2208	3.96601	3.7131	1.4652
lpg0107, lpg1148, lpg1701, lpg1959	4	1	0	0	0	0	0	0	0	1	0	0	0	0	0	0	0	0	0	0		1	1	1	1	1	1	1	2	1	1	1	1	1	1	1	1	1	1		0.9176	0.379478	0.849979	0.921065	0.655136	0.406934	0.283286	1.2377	0.4884
lpg0107, lpg1148, lpg1959	3	9	0	0	0	0	0	50	135	50	49	109	0	0	0	0	22	67	26	41		1	1	1	1	1	51	136	51	50	110	1	1	1	1	23	68	27	42		0.9176	0.379478	0.849979	0.921065	0.655136	20.7536	38.5269	31.5614	24.42
lpg0107, lpg1148, lpg1959, lpg2884, lpg2885	5	1	0	0	0	0	0	0	0	0	0	0	0	0	0	0	0	0	1	0		1	1	1	1	1	1	1	1	1	1	1	1	1	1	1	1	2	1		0.9176	0.379478	0.849979	0.921065	0.655136	0.406934	0.283286	0.61885	0.4884
lpg0107, lpg1525	2	9	0	0	0	0	0	8	21	10	10	27	0	0	0	0	7	7	4	7		1	1	1	1	1	9	22	11	11	28	1	1	1	1	8	8	5	8		0.9176	0.379478	0.849979	0.921065	0.655136	3.66241	6.23229	6.80735	5.37241
lpg0107, lpg1525, lpg1689, lpg1776, lpg2223, lpg2692	6	1	0	0	0	0	0	0	0	0	0	1	0	0	0	0	0	0	0	0		1	1	1	1	1	1	1	1	1	2	1	1	1	1	1	1	1	1		0.9176	0.379478	0.849979	0.921065	0.655136	0.406934	0.283286	0.61885	0.4884
lpg0107, lpg1525, lpg2223, lpg2692, lpg3000	5	1	0	0	0	0	0	0	0	1	0	0	0	0	0	0	0	0	0	0		1	1	1	1	1	1	1	2	1	1	1	1	1	1	1	1	1	1		0.9176	0.379478	0.849979	0.921065	0.655136	0.406934	0.283286	1.2377	0.4884
lpg0107, lpg1525, lpg2733	3	10	0	0	0	0	0	37	54	24	36	66	0	0	3	0	13	27	13	26		1	1	1	1	1	38	55	25	37	67	1	1	4	1	14	28	14	27		0.9176	0.379478	0.849979	0.921065	0.655136	15.4635	15.5807	15.4713	18.0708
lpg0107, lpg1527	2	1	0	0	0	0	0	0	0	0	0	0	0	0	0	1	0	0	0	0		1	1	1	1	1	1	1	1	1	1	1	1	1	2	1	1	1	1		0.9176	0.379478	0.849979	0.921065	0.655136	0.406934	0.283286	0.61885	0.4884
lpg0107, lpg1527, lpg1621	3	1	0	0	0	1	0	0	0	0	0	0	0	0	0	0	0	0	0	0		1	1	1	2	1	1	1	1	1	1	1	1	1	1	1	1	1	1		0.9176	0.379478	0.849979	1.84213	0.655136	0.406934	0.283286	0.61885	0.4884
lpg0107, lpg1527, lpg1621, lpg2271, lpg2885	5	1	0	0	0	0	0	0	0	0	0	0	0	0	0	1	0	0	0	0		1	1	1	1	1	1	1	1	1	1	1	1	1	2	1	1	1	1		0.9176	0.379478	0.849979	0.921065	0.655136	0.406934	0.283286	0.61885	0.4884
lpg0107, lpg1527, lpg1621, lpg2885	4	1	0	1	0	0	0	0	0	0	0	0	0	0	0	0	0	0	0	0		1	2	1	1	1	1	1	1	1	1	1	1	1	1	1	1	1	1		0.9176	0.758956	0.849979	0.921065	0.655136	0.406934	0.283286	0.61885	0.4884
lpg0107, lpg1527, lpg1959	3	4	0	0	1	1	1	0	0	0	0	0	0	0	0	2	0	0	0	0		1	1	2	2	2	1	1	1	1	1	1	1	1	3	1	1	1	1		0.9176	0.379478	1.69996	1.84213	1.31027	0.406934	0.283286	0.61885	0.4884
lpg0107, lpg1527, lpg1959, lpg2733	4	5	0	7	0	0	1	0	0	0	0	0	0	2	1	1	0	0	0	0		1	8	1	1	2	1	1	1	1	1	1	3	2	2	1	1	1	1		0.9176	3.03582	0.849979	0.921065	1.31027	0.406934	0.283286	0.61885	0.4884
lpg0107, lpg1527, lpg2733	3	1	0	0	0	1	0	0	0	0	0	0	0	0	0	0	0	0	0	0		1	1	1	2	1	1	1	1	1	1	1	1	1	1	1	1	1	1		0.9176	0.379478	0.849979	1.84213	0.655136	0.406934	0.283286	0.61885	0.4884
lpg0107, lpg1621, lpg2271, lpg2885	4	1	0	0	0	0	0	0	0	0	0	0	0	0	0	1	0	0	0	0		1	1	1	1	1	1	1	1	1	1	1	1	1	2	1	1	1	1		0.9176	0.379478	0.849979	0.921065	0.655136	0.406934	0.283286	0.61885	0.4884
lpg0107, lpg1661	2	9	0	0	0	0	0	1	1	1	3	3	0	0	0	0	3	3	2	1		1	1	1	1	1	2	2	2	4	4	1	1	1	1	4	4	3	2		0.9176	0.379478	0.849979	0.921065	0.655136	0.813868	0.566572	1.2377	1.9536
lpg0107, lpg1661, lpg1702	3	9	0	0	0	0	0	13	11	7	7	6	0	0	0	0	2	13	6	8		1	1	1	1	1	14	12	8	8	7	1	1	1	1	3	14	7	9		0.9176	0.379478	0.849979	0.921065	0.655136	5.69708	3.39943	4.9508	3.9072
lpg0107, lpg1661, lpg1702, lpg2888	4	10	0	0	0	0	0	66	66	44	63	34	0	0	1	0	61	144	43	64		1	1	1	1	1	67	67	45	64	35	1	1	2	1	62	145	44	65		0.9176	0.379478	0.849979	0.921065	0.655136	27.2646	18.9802	27.8483	31.2576
lpg0107, lpg1661, lpg2552	3	1	0	0	0	0	0	0	0	0	0	0	0	0	0	2	0	0	0	0		1	1	1	1	1	1	1	1	1	1	1	1	1	3	1	1	1	1		0.9176	0.379478	0.849979	0.921065	0.655136	0.406934	0.283286	0.61885	0.4884
lpg0107, lpg1661, lpg2815	3	3	0	0	0	0	0	1	0	0	1	0	0	0	0	0	0	2	0	0		1	1	1	1	1	2	1	1	2	1	1	1	1	1	1	3	1	1		0.9176	0.379478	0.849979	0.921065	0.655136	0.813868	0.283286	0.61885	0.976801
lpg0107, lpg1661, lpg2888	3	9	0	0	0	0	0	4	6	1	4	1	0	0	0	0	2	9	5	3		1	1	1	1	1	5	7	2	5	2	1	1	1	1	3	10	6	4		0.9176	0.379478	0.849979	0.921065	0.655136	2.03467	1.983	1.2377	2.442
lpg0107, lpg1689	2	15	0	3	1	0	2	106	328	141	52	149	0	1	3	3	49	173	53	113		1	4	2	1	3	107	329	142	53	150	1	2	4	4	50	174	54	114		0.9176	1.51791	1.69996	0.921065	1.96541	43.542	93.2011	87.8767	25.8852
lpg0107, lpg1689, lpg1776	3	9	0	0	0	0	0	15	31	10	7	20	0	0	0	0	9	23	6	9		1	1	1	1	1	16	32	11	8	21	1	1	1	1	10	24	7	10		0.9176	0.379478	0.849979	0.921065	0.655136	6.51095	9.06516	6.80735	3.9072
lpg0107, lpg1701, lpg1907	3	4	0	0	0	0	0	0	1	0	0	1	0	0	0	0	0	1	0	1		1	1	1	1	1	1	2	1	1	2	1	1	1	1	1	2	1	2		0.9176	0.379478	0.849979	0.921065	0.655136	0.406934	0.566572	0.61885	0.4884
lpg0107, lpg1701, lpg1907, lpg2584	4	8	0	0	0	0	0	2	5	1	1	1	0	0	0	0	1	8	0	1		1	1	1	1	1	3	6	2	2	2	1	1	1	1	2	9	1	2		0.9176	0.379478	0.849979	0.921065	0.655136	1.2208	1.69972	1.2377	0.976801
lpg0107, lpg1701, lpg2584	3	4	0	0	0	0	0	1	1	1	0	0	0	0	0	0	0	1	0	0		1	1	1	1	1	2	2	2	1	1	1	1	1	1	1	2	1	1		0.9176	0.379478	0.849979	0.921065	0.655136	0.813868	0.566572	1.2377	0.4884
lpg0107, lpg1702	2	9	0	0	0	0	0	9	8	3	4	7	0	0	0	0	5	9	1	10		1	1	1	1	1	10	9	4	5	8	1	1	1	1	6	10	2	11		0.9176	0.379478	0.849979	0.921065	0.655136	4.06934	2.54958	2.4754	2.442
lpg0107, lpg1702, lpg1907, lpg2223, lpg2628, lpg2888	6	1	0	0	0	0	0	0	1	0	0	0	0	0	0	0	0	0	0	0		1	1	1	1	1	1	2	1	1	1	1	1	1	1	1	1	1	1		0.9176	0.379478	0.849979	0.921065	0.655136	0.406934	0.566572	0.61885	0.4884
lpg0107, lpg1702, lpg2815	3	3	0	0	0	0	0	1	0	0	1	0	0	0	0	0	1	0	0	0		1	1	1	1	1	2	1	1	2	1	1	1	1	1	2	1	1	1		0.9176	0.379478	0.849979	0.921065	0.655136	0.813868	0.283286	0.61885	0.976801
lpg0107, lpg1702, lpg2888	3	9	0	0	0	0	0	21	15	5	10	14	0	0	0	0	14	28	10	13		1	1	1	1	1	22	16	6	11	15	1	1	1	1	15	29	11	14		0.9176	0.379478	0.849979	0.921065	0.655136	8.95255	4.53258	3.7131	5.37241
lpg0107, lpg1776	2	9	0	0	0	0	1	2	7	3	1	4	0	0	0	0	0	6	2	2		1	1	1	1	2	3	8	4	2	5	1	1	1	1	1	7	3	3		0.9176	0.379478	0.849979	0.921065	1.31027	1.2208	2.26629	2.4754	0.976801
lpg0107, lpg1776, lpg2884	3	3	0	1	0	1	0	0	0	0	0	0	0	0	0	1	0	0	0	0		1	2	1	2	1	1	1	1	1	1	1	1	1	2	1	1	1	1		0.9176	0.758956	0.849979	1.84213	0.655136	0.406934	0.283286	0.61885	0.4884
lpg0107, lpg1776, lpg2884, lpg2885	4	3	0	3	0	3	0	0	0	0	0	0	2	0	0	0	0	0	0	0		1	4	1	4	1	1	1	1	1	1	3	1	1	1	1	1	1	1		0.9176	1.51791	0.849979	3.68426	0.655136	0.406934	0.283286	0.61885	0.4884
lpg0107, lpg1776, lpg2885	3	2	0	0	0	0	0	0	0	0	0	0	0	0	1	1	0	0	0	0		1	1	1	1	1	1	1	1	1	1	1	1	2	2	1	1	1	1		0.9176	0.379478	0.849979	0.921065	0.655136	0.406934	0.283286	0.61885	0.4884
lpg0107, lpg1907, lpg2584	3	1	0	0	0	0	0	1	0	0	0	0	0	0	0	0	0	0	0	0		1	1	1	1	1	2	1	1	1	1	1	1	1	1	1	1	1	1		0.9176	0.379478	0.849979	0.921065	0.655136	0.813868	0.283286	0.61885	0.4884
lpg0107, lpg1907, lpg2692	3	2	0	0	2	1	0	0	0	0	0	0	0	0	0	0	0	0	0	0		1	1	3	2	1	1	1	1	1	1	1	1	1	1	1	1	1	1		0.9176	0.379478	2.54994	1.84213	0.655136	0.406934	0.283286	0.61885	0.4884
lpg0107, lpg1959	2	10	0	0	0	0	0	2	12	9	6	5	0	2	0	0	1	9	1	3		1	1	1	1	1	3	13	10	7	6	1	3	1	1	2	10	2	4		0.9176	0.379478	0.849979	0.921065	0.655136	1.2208	3.68272	6.1885	3.4188
lpg0107, lpg1959, lpg2733	3	1	0	2	0	0	0	0	0	0	0	0	0	0	0	0	0	0	0	0		1	3	1	1	1	1	1	1	1	1	1	1	1	1	1	1	1	1		0.9176	1.13843	0.849979	0.921065	0.655136	0.406934	0.283286	0.61885	0.4884
lpg0107, lpg2223, lpg2692	3	1	0	0	0	0	0	0	1	0	0	0	0	0	0	0	0	0	0	0		1	1	1	1	1	1	2	1	1	1	1	1	1	1	1	1	1	1		0.9176	0.379478	0.849979	0.921065	0.655136	0.406934	0.566572	0.61885	0.4884
lpg0107, lpg2271	2	1	1	0	0	0	0	0	0	0	0	0	0	0	0	0	0	0	0	0		2	1	1	1	1	1	1	1	1	1	1	1	1	1	1	1	1	1		1.8352	0.379478	0.849979	0.921065	0.655136	0.406934	0.283286	0.61885	0.4884
lpg0107, lpg2271, lpg2552	3	1	0	0	1	0	0	0	0	0	0	0	0	0	0	0	0	0	0	0		1	1	2	1	1	1	1	1	1	1	1	1	1	1	1	1	1	1		0.9176	0.379478	1.69996	0.921065	0.655136	0.406934	0.283286	0.61885	0.4884
lpg0107, lpg2271, lpg2552, lpg2733	4	6	1	4	1	1	0	0	0	0	0	0	0	0	1	2	0	0	0	0		2	5	2	2	1	1	1	1	1	1	1	1	2	3	1	1	1	1		1.8352	1.89739	1.69996	1.84213	0.655136	0.406934	0.283286	0.61885	0.4884
lpg0107, lpg2271, lpg2733	3	1	0	0	0	0	1	0	0	0	0	0	0	0	0	0	0	0	0	0		1	1	1	1	2	1	1	1	1	1	1	1	1	1	1	1	1	1		0.9176	0.379478	0.849979	0.921065	1.31027	0.406934	0.283286	0.61885	0.4884
lpg0107, lpg2552	2	9	4	27	9	6	11	0	0	0	0	0	40	28	10	32	0	0	0	0		5	28	10	7	12	1	1	1	1	1	41	29	11	33	1	1	1	1		4.588	10.6254	8.49979	6.44745	7.86164	0.406934	0.283286	0.61885	0.4884
lpg0107, lpg2552, lpg2584	3	6	0	2	0	0	2	0	0	0	0	0	1	1	1	8	0	0	0	0		1	3	1	1	3	1	1	1	1	1	2	2	2	9	1	1	1	1		0.9176	1.13843	0.849979	0.921065	1.96541	0.406934	0.283286	0.61885	0.4884
lpg0107, lpg2584	2	4	0	3	0	0	0	0	0	1	0	0	0	0	1	8	0	0	0	0		1	4	1	1	1	1	1	2	1	1	1	1	2	9	1	1	1	1		0.9176	1.51791	0.849979	0.921065	0.655136	0.406934	0.283286	1.2377	0.4884
lpg0107, lpg2584, lpg2733	3	1	0	0	0	0	0	0	0	0	0	0	0	0	0	0	0	0	1	0		1	1	1	1	1	1	1	1	1	1	1	1	1	1	1	1	2	1		0.9176	0.379478	0.849979	0.921065	0.655136	0.406934	0.283286	0.61885	0.4884
lpg0107, lpg2692	2	10	0	1	0	0	0	9	31	17	9	22	0	0	0	0	7	16	5	15		1	2	1	1	1	10	32	18	10	23	1	1	1	1	8	17	6	16		0.9176	0.758956	0.849979	0.921065	0.655136	4.06934	9.06516	11.1393	4.884
lpg0107, lpg2733	2	17	2	24	5	5	11	3	15	4	11	21	3	15	11	28	0	10	2	4		3	25	6	6	12	4	16	5	12	22	4	16	12	29	1	11	3	5		2.7528	9.48695	5.09987	5.52639	7.86164	1.62774	4.53258	3.09425	5.86081
lpg0107, lpg2815	2	1	0	0	0	0	0	0	0	0	1	0	0	0	0	0	0	0	0	0		1	1	1	1	1	1	1	1	2	1	1	1	1	1	1	1	1	1		0.9176	0.379478	0.849979	0.921065	0.655136	0.406934	0.283286	0.61885	0.976801
lpg0107, lpg2874, lpg2885	3	1	0	1	0	0	0	0	0	0	0	0	0	0	0	0	0	0	0	0		1	2	1	1	1	1	1	1	1	1	1	1	1	1	1	1	1	1		0.9176	0.758956	0.849979	0.921065	0.655136	0.406934	0.283286	0.61885	0.4884
lpg0107, lpg2884, lpg2885	3	1	0	0	0	0	0	0	0	0	0	0	0	0	1	0	0	0	0	0		1	1	1	1	1	1	1	1	1	1	1	1	2	1	1	1	1	1		0.9176	0.379478	0.849979	0.921065	0.655136	0.406934	0.283286	0.61885	0.4884
lpg0107, lpg2884, lpg3000	3	1	0	0	2	0	0	0	0	0	0	0	0	0	0	0	0	0	0	0		1	1	3	1	1	1	1	1	1	1	1	1	1	1	1	1	1	1		0.9176	0.379478	2.54994	0.921065	0.655136	0.406934	0.283286	0.61885	0.4884
lpg0107, lpg2888	2	8	0	0	0	0	0	2	2	2	4	1	0	0	0	0	1	6	3	0		1	1	1	1	1	3	3	3	5	2	1	1	1	1	2	7	4	1		0.9176	0.379478	0.849979	0.921065	0.655136	1.2208	0.849858	1.85655	2.442
lpg0140	1	18	23	207	82	46	66	24	84	29	20	54	34	26	53	90	16	19	17	6		24	208	83	47	67	25	85	30	21	55	35	27	54	91	17	20	18	7		22.0224	78.9314	70.5482	43.29	43.8941	10.1734	24.0793	18.5655	10.2564
lpg0140, lpg0171	2	2	0	0	0	0	0	0	2	0	0	0	0	0	0	0	0	0	1	0		1	1	1	1	1	1	3	1	1	1	1	1	1	1	1	1	2	1		0.9176	0.379478	0.849979	0.921065	0.655136	0.406934	0.849858	0.61885	0.4884
lpg0140, lpg0171, lpg1137, lpg1776	4	1	0	0	0	0	0	0	0	0	0	0	0	0	0	1	0	0	0	0		1	1	1	1	1	1	1	1	1	1	1	1	1	2	1	1	1	1		0.9176	0.379478	0.849979	0.921065	0.655136	0.406934	0.283286	0.61885	0.4884
lpg0140, lpg0171, lpg1525, lpg1776	4	1	0	0	0	0	0	0	1	0	0	0	0	0	0	0	0	0	0	0		1	1	1	1	1	1	2	1	1	1	1	1	1	1	1	1	1	1		0.9176	0.379478	0.849979	0.921065	0.655136	0.406934	0.566572	0.61885	0.4884
lpg0140, lpg0171, lpg1776	3	9	0	0	0	0	0	5	13	7	5	5	0	0	0	0	12	14	4	3		1	1	1	1	1	6	14	8	6	6	1	1	1	1	13	15	5	4		0.9176	0.379478	0.849979	0.921065	0.655136	2.4416	3.96601	4.9508	2.9304
lpg0140, lpg0171, lpg1907	3	2	0	0	0	0	0	0	0	0	0	3	0	0	0	0	1	0	0	0		1	1	1	1	1	1	1	1	1	4	1	1	1	1	2	1	1	1		0.9176	0.379478	0.849979	0.921065	0.655136	0.406934	0.283286	0.61885	0.4884
lpg0140, lpg0171, lpg1907, lpg2733	4	2	0	0	0	0	0	2	0	0	1	0	0	0	0	0	0	0	0	0		1	1	1	1	1	3	1	1	2	1	1	1	1	1	1	1	1	1		0.9176	0.379478	0.849979	0.921065	0.655136	1.2208	0.283286	0.61885	0.976801
lpg0140, lpg0171, lpg1907, lpg2733, lpg3000	5	5	0	0	0	0	0	3	4	0	0	3	0	0	0	0	0	0	1	1		1	1	1	1	1	4	5	1	1	4	1	1	1	1	1	1	2	2		0.9176	0.379478	0.849979	0.921065	0.655136	1.62774	1.41643	0.61885	0.4884
lpg0140, lpg0171, lpg1907, lpg3000	4	5	0	0	0	0	0	2	1	2	0	1	0	0	0	0	1	0	0	0		1	1	1	1	1	3	2	3	1	2	1	1	1	1	2	1	1	1		0.9176	0.379478	0.849979	0.921065	0.655136	1.2208	0.566572	1.85655	0.4884
lpg0140, lpg0171, lpg2733	3	1	0	0	0	0	0	0	0	0	1	0	0	0	0	0	0	0	0	0		1	1	1	1	1	1	1	1	2	1	1	1	1	1	1	1	1	1		0.9176	0.379478	0.849979	0.921065	0.655136	0.406934	0.283286	0.61885	0.976801
lpg0140, lpg0171, lpg2733, lpg3000	4	1	0	0	0	0	0	0	1	0	0	0	0	0	0	0	0	0	0	0		1	1	1	1	1	1	2	1	1	1	1	1	1	1	1	1	1	1		0.9176	0.379478	0.849979	0.921065	0.655136	0.406934	0.566572	0.61885	0.4884
lpg0140, lpg0171, lpg3000	3	2	0	0	0	0	0	0	1	1	0	0	0	0	0	0	0	0	0	0		1	1	1	1	1	1	2	2	1	1	1	1	1	1	1	1	1	1		0.9176	0.379478	0.849979	0.921065	0.655136	0.406934	0.566572	1.2377	0.4884
lpg0140, lpg0246	2	11	9	47	33	16	9	0	0	0	0	2	23	5	10	19	0	1	0	0		10	48	34	17	10	1	1	1	1	3	24	6	11	20	1	2	1	1		9.176	18.2149	28.8993	15.6581	6.55136	0.406934	0.283286	0.61885	0.4884
lpg0140, lpg0246, lpg0439, lpg1661	4	1	0	0	0	0	0	0	0	0	0	0	0	0	0	1	0	0	0	0		1	1	1	1	1	1	1	1	1	1	1	1	1	2	1	1	1	1		0.9176	0.379478	0.849979	0.921065	0.655136	0.406934	0.283286	0.61885	0.4884
lpg0140, lpg0246, lpg1702	3	9	26	168	75	16	21	0	0	0	0	0	11	19	16	50	0	0	0	0		27	169	76	17	22	1	1	1	1	1	12	20	17	51	1	1	1	1		24.7752	64.1318	64.5984	15.6581	14.413	0.406934	0.283286	0.61885	0.4884
lpg0140, lpg0246, lpg1702, lpg2223, lpg2815	5	1	0	0	0	0	0	0	0	0	0	0	0	0	0	1	0	0	0	0		1	1	1	1	1	1	1	1	1	1	1	1	1	2	1	1	1	1		0.9176	0.379478	0.849979	0.921065	0.655136	0.406934	0.283286	0.61885	0.4884
lpg0140, lpg0246, lpg1702, lpg2584	4	1	0	0	0	0	0	0	0	0	0	0	0	0	0	1	0	0	0	0		1	1	1	1	1	1	1	1	1	1	1	1	1	2	1	1	1	1		0.9176	0.379478	0.849979	0.921065	0.655136	0.406934	0.283286	0.61885	0.4884
lpg0140, lpg0246, lpg2628	3	9	0	0	0	0	0	6	20	7	3	5	0	0	0	0	7	3	1	1		1	1	1	1	1	7	21	8	4	6	1	1	1	1	8	4	2	2		0.9176	0.379478	0.849979	0.921065	0.655136	2.84854	5.94901	4.9508	1.9536
lpg0140, lpg0404, lpg1099, lpg2584, lpg2884, lpg2885	6	1	0	0	0	0	0	0	0	0	0	0	0	0	0	0	0	0	1	0		1	1	1	1	1	1	1	1	1	1	1	1	1	1	1	1	2	1		0.9176	0.379478	0.849979	0.921065	0.655136	0.406934	0.283286	0.61885	0.4884
lpg0140, lpg0404, lpg1907	3	2	0	1	0	0	0	0	0	0	0	0	1	0	0	0	0	0	0	0		1	2	1	1	1	1	1	1	1	1	2	1	1	1	1	1	1	1		0.9176	0.758956	0.849979	0.921065	0.655136	0.406934	0.283286	0.61885	0.4884
lpg0140, lpg0404, lpg1907, lpg2271	4	7	8	0	4	7	2	0	0	0	0	0	3	0	6	3	0	0	0	0		9	1	5	8	3	1	1	1	1	1	4	1	7	4	1	1	1	1		8.2584	0.379478	4.24989	7.36852	1.96541	0.406934	0.283286	0.61885	0.4884
lpg0140, lpg0404, lpg2271	3	1	0	0	0	0	0	0	0	0	0	0	0	0	1	0	0	0	0	0		1	1	1	1	1	1	1	1	1	1	1	1	2	1	1	1	1	1		0.9176	0.379478	0.849979	0.921065	0.655136	0.406934	0.283286	0.61885	0.4884
lpg0140, lpg0439	2	1	0	0	0	0	0	0	0	0	0	0	0	0	0	0	0	1	0	0		1	1	1	1	1	1	1	1	1	1	1	1	1	1	1	2	1	1		0.9176	0.379478	0.849979	0.921065	0.655136	0.406934	0.283286	0.61885	0.4884
lpg0140, lpg0439, lpg0518	3	2	0	0	0	0	0	0	1	0	0	1	0	0	0	0	0	0	0	0		1	1	1	1	1	1	2	1	1	2	1	1	1	1	1	1	1	1		0.9176	0.379478	0.849979	0.921065	0.655136	0.406934	0.566572	0.61885	0.4884
lpg0140, lpg0439, lpg0518, lpg0879	4	6	0	0	0	0	0	0	3	1	1	1	0	0	0	0	0	2	1	0		1	1	1	1	1	1	4	2	2	2	1	1	1	1	1	3	2	1		0.9176	0.379478	0.849979	0.921065	0.655136	0.406934	1.13314	1.2377	0.976801
lpg0140, lpg0439, lpg0518, lpg0879, lpg2888	5	9	0	0	0	0	0	3	18	11	2	13	0	0	0	0	6	9	1	1		1	1	1	1	1	4	19	12	3	14	1	1	1	1	7	10	2	2		0.9176	0.379478	0.849979	0.921065	0.655136	1.62774	5.38244	7.4262	1.4652
lpg0140, lpg0439, lpg0518, lpg0963, lpg1527, lpg1701, lpg2223, lpg3000	8	1	0	0	0	0	0	0	0	0	0	0	0	0	0	0	0	0	0	1		1	1	1	1	1	1	1	1	1	1	1	1	1	1	1	1	1	2		0.9176	0.379478	0.849979	0.921065	0.655136	0.406934	0.283286	0.61885	0.4884
lpg0140, lpg0439, lpg0518, lpg2888	4	4	0	0	0	0	0	0	2	1	0	1	0	0	0	0	0	1	0	0		1	1	1	1	1	1	3	2	1	2	1	1	1	1	1	2	1	1		0.9176	0.379478	0.849979	0.921065	0.655136	0.406934	0.849858	1.2377	0.4884
lpg0140, lpg0439, lpg0879	3	3	0	0	0	0	0	0	1	0	2	0	0	0	0	0	0	1	0	0		1	1	1	1	1	1	2	1	3	1	1	1	1	1	1	2	1	1		0.9176	0.379478	0.849979	0.921065	0.655136	0.406934	0.566572	0.61885	1.4652
lpg0140, lpg0439, lpg0879, lpg2888	4	1	0	0	0	0	0	0	1	0	0	0	0	0	0	0	0	0	0	0		1	1	1	1	1	1	2	1	1	1	1	1	1	1	1	1	1	1		0.9176	0.379478	0.849979	0.921065	0.655136	0.406934	0.566572	0.61885	0.4884
lpg0140, lpg0439, lpg1621, lpg2884	4	2	0	3	0	0	0	0	0	0	0	0	0	1	0	0	0	0	0	0		1	4	1	1	1	1	1	1	1	1	1	2	1	1	1	1	1	1		0.9176	1.51791	0.849979	0.921065	0.655136	0.406934	0.283286	0.61885	0.4884
lpg0140, lpg0439, lpg2271	3	3	0	1	0	0	0	0	0	0	0	0	1	0	1	0	0	0	0	0		1	2	1	1	1	1	1	1	1	1	2	1	2	1	1	1	1	1		0.9176	0.758956	0.849979	0.921065	0.655136	0.406934	0.283286	0.61885	0.4884
lpg0140, lpg0439, lpg2271, lpg2552, lpg2885	5	1	0	0	1	0	0	0	0	0	0	0	0	0	0	0	0	0	0	0		1	1	2	1	1	1	1	1	1	1	1	1	1	1	1	1	1	1		0.9176	0.379478	1.69996	0.921065	0.655136	0.406934	0.283286	0.61885	0.4884
lpg0140, lpg0439, lpg2271, lpg2885	4	6	0	1	2	1	0	0	0	0	0	0	1	1	1	0	0	0	0	0		1	2	3	2	1	1	1	1	1	1	2	2	2	1	1	1	1	1		0.9176	0.758956	2.54994	1.84213	0.655136	0.406934	0.283286	0.61885	0.4884
lpg0140, lpg0439, lpg2885	3	2	0	1	1	0	0	0	0	0	0	0	0	0	0	0	0	0	0	0		1	2	2	1	1	1	1	1	1	1	1	1	1	1	1	1	1	1		0.9176	0.758956	1.69996	0.921065	0.655136	0.406934	0.283286	0.61885	0.4884
lpg0140, lpg0439, lpg2888	3	1	0	0	0	0	0	0	0	0	0	1	0	0	0	0	0	0	0	0		1	1	1	1	1	1	1	1	1	2	1	1	1	1	1	1	1	1		0.9176	0.379478	0.849979	0.921065	0.655136	0.406934	0.283286	0.61885	0.4884
lpg0140, lpg0518	2	4	0	0	0	0	0	2	0	0	1	0	0	0	0	0	2	2	0	0		1	1	1	1	1	3	1	1	2	1	1	1	1	1	3	3	1	1		0.9176	0.379478	0.849979	0.921065	0.655136	1.2208	0.283286	0.61885	0.976801
lpg0140, lpg0518, lpg0621	3	8	0	0	0	0	0	7	2	0	2	1	0	0	0	0	12	15	2	2		1	1	1	1	1	8	3	1	3	2	1	1	1	1	13	16	3	3		0.9176	0.379478	0.849979	0.921065	0.655136	3.25547	0.849858	0.61885	1.4652
lpg0140, lpg0518, lpg0621, lpg2815	4	7	0	0	0	0	0	28	0	0	19	0	0	0	1	0	23	53	17	15		1	1	1	1	1	29	1	1	20	1	1	1	2	1	24	54	18	16		0.9176	0.379478	0.849979	0.921065	0.655136	11.8011	0.283286	0.61885	9.76801
lpg0140, lpg0518, lpg0879	3	1	0	0	0	0	0	0	0	1	0	0	0	0	0	0	0	0	0	0		1	1	1	1	1	1	1	2	1	1	1	1	1	1	1	1	1	1		0.9176	0.379478	0.849979	0.921065	0.655136	0.406934	0.283286	1.2377	0.4884
lpg0140, lpg0518, lpg0879, lpg1148, lpg1702, lpg1776, lpg2244, lpg2692	8	1	0	0	0	0	0	0	0	0	0	0	0	0	0	0	0	0	0	1		1	1	1	1	1	1	1	1	1	1	1	1	1	1	1	1	1	2		0.9176	0.379478	0.849979	0.921065	0.655136	0.406934	0.283286	0.61885	0.4884
lpg0140, lpg0518, lpg0879, lpg1148, lpg1702, lpg1776, lpg2244, lpg2692, lpg2806	9	5	0	0	0	0	0	6	0	0	1	0	0	0	0	0	2	9	0	1		1	1	1	1	1	7	1	1	2	1	1	1	1	1	3	10	1	2		0.9176	0.379478	0.849979	0.921065	0.655136	2.84854	0.283286	0.61885	0.976801
lpg0140, lpg0518, lpg0879, lpg1148, lpg1702, lpg1776, lpg2244, lpg2692, lpg2806, lpg2815	10	7	0	0	0	0	0	14	0	0	16	1	0	0	0	0	7	14	6	15		1	1	1	1	1	15	1	1	17	2	1	1	1	1	8	15	7	16		0.9176	0.379478	0.849979	0.921065	0.655136	6.10401	0.283286	0.61885	8.30281
lpg0140, lpg0518, lpg0879, lpg1148, lpg1702, lpg1776, lpg2244, lpg2692, lpg2815	9	2	0	0	0	0	0	2	0	0	0	0	0	0	0	0	1	0	0	0		1	1	1	1	1	3	1	1	1	1	1	1	1	1	2	1	1	1		0.9176	0.379478	0.849979	0.921065	0.655136	1.2208	0.283286	0.61885	0.4884
lpg0140, lpg0518, lpg0879, lpg1148, lpg1702, lpg1776, lpg2244, lpg2806	8	4	0	0	0	0	0	1	0	0	2	0	0	0	0	0	0	1	0	1		1	1	1	1	1	2	1	1	3	1	1	1	1	1	1	2	1	2		0.9176	0.379478	0.849979	0.921065	0.655136	0.813868	0.283286	0.61885	1.4652
lpg0140, lpg0518, lpg0879, lpg1148, lpg1702, lpg1776, lpg2244, lpg2806, lpg2815	9	4	0	0	0	0	0	2	0	0	3	0	0	0	0	0	2	2	0	0		1	1	1	1	1	3	1	1	4	1	1	1	1	1	3	3	1	1		0.9176	0.379478	0.849979	0.921065	0.655136	1.2208	0.283286	0.61885	1.9536
lpg0140, lpg0518, lpg0879, lpg1148, lpg1702, lpg1776, lpg2244, lpg2815	8	1	0	0	0	0	0	0	0	0	1	0	0	0	0	0	0	0	0	0		1	1	1	1	1	1	1	1	2	1	1	1	1	1	1	1	1	1		0.9176	0.379478	0.849979	0.921065	0.655136	0.406934	0.283286	0.61885	0.976801
lpg0140, lpg0518, lpg0879, lpg1148, lpg1702, lpg1776, lpg2692, lpg2806	8	4	0	0	0	0	0	1	0	0	1	0	0	0	0	0	1	0	0	1		1	1	1	1	1	2	1	1	2	1	1	1	1	1	2	1	1	2		0.9176	0.379478	0.849979	0.921065	0.655136	0.813868	0.283286	0.61885	0.976801
lpg0140, lpg0518, lpg0879, lpg1148, lpg1702, lpg1776, lpg2692, lpg2806, lpg2815	9	2	0	0	0	0	0	0	0	0	1	0	0	0	0	0	0	1	0	0		1	1	1	1	1	1	1	1	2	1	1	1	1	1	1	2	1	1		0.9176	0.379478	0.849979	0.921065	0.655136	0.406934	0.283286	0.61885	0.976801
lpg0140, lpg0518, lpg0879, lpg1148, lpg1702, lpg1776, lpg2806, lpg2815	8	2	0	0	0	0	0	1	0	0	0	0	0	0	0	0	0	2	0	0		1	1	1	1	1	2	1	1	1	1	1	1	1	1	1	3	1	1		0.9176	0.379478	0.849979	0.921065	0.655136	0.813868	0.283286	0.61885	0.4884
lpg0140, lpg0518, lpg0879, lpg1148, lpg1702, lpg2244, lpg2692, lpg2806, lpg2815	9	2	0	0	0	0	0	1	0	0	0	0	0	0	0	0	0	1	0	0		1	1	1	1	1	2	1	1	1	1	1	1	1	1	1	2	1	1		0.9176	0.379478	0.849979	0.921065	0.655136	0.813868	0.283286	0.61885	0.4884
lpg0140, lpg0518, lpg0879, lpg1148, lpg1702, lpg2244, lpg2806	7	1	0	0	0	0	0	0	0	0	0	0	0	0	0	0	0	0	0	1		1	1	1	1	1	1	1	1	1	1	1	1	1	1	1	1	1	2		0.9176	0.379478	0.849979	0.921065	0.655136	0.406934	0.283286	0.61885	0.4884
lpg0140, lpg0518, lpg0879, lpg1148, lpg1702, lpg2244, lpg2806, lpg2815	8	1	0	0	0	0	0	0	0	0	0	0	0	0	0	0	0	1	0	0		1	1	1	1	1	1	1	1	1	1	1	1	1	1	1	2	1	1		0.9176	0.379478	0.849979	0.921065	0.655136	0.406934	0.283286	0.61885	0.4884
lpg0140, lpg0518, lpg0879, lpg1148, lpg1776, lpg2244, lpg2692	7	1	0	0	0	0	0	0	0	0	0	0	0	0	0	0	0	0	1	0		1	1	1	1	1	1	1	1	1	1	1	1	1	1	1	1	2	1		0.9176	0.379478	0.849979	0.921065	0.655136	0.406934	0.283286	0.61885	0.4884
lpg0140, lpg0518, lpg0879, lpg1148, lpg1776, lpg2244, lpg2692, lpg2806	8	1	0	0	0	0	0	0	0	0	0	0	0	0	0	0	0	0	0	1		1	1	1	1	1	1	1	1	1	1	1	1	1	1	1	1	1	2		0.9176	0.379478	0.849979	0.921065	0.655136	0.406934	0.283286	0.61885	0.4884
lpg0140, lpg0518, lpg0879, lpg1148, lpg1776, lpg2244, lpg2692, lpg2806, lpg2815	9	4	0	0	0	0	0	2	0	0	3	0	0	0	0	0	1	1	0	0		1	1	1	1	1	3	1	1	4	1	1	1	1	1	2	2	1	1		0.9176	0.379478	0.849979	0.921065	0.655136	1.2208	0.283286	0.61885	1.9536
lpg0140, lpg0518, lpg0879, lpg1148, lpg1776, lpg2244, lpg2806	7	1	0	0	0	0	0	0	0	0	0	0	0	0	0	0	0	1	0	0		1	1	1	1	1	1	1	1	1	1	1	1	1	1	1	2	1	1		0.9176	0.379478	0.849979	0.921065	0.655136	0.406934	0.283286	0.61885	0.4884
lpg0140, lpg0518, lpg0879, lpg1148, lpg1776, lpg2692, lpg2806, lpg2815	8	2	0	0	0	0	0	0	0	0	1	0	0	0	0	0	1	0	0	0		1	1	1	1	1	1	1	1	2	1	1	1	1	1	2	1	1	1		0.9176	0.379478	0.849979	0.921065	0.655136	0.406934	0.283286	0.61885	0.976801
lpg0140, lpg0518, lpg0879, lpg1148, lpg2244, lpg2692, lpg2806, lpg2815	8	1	0	0	0	0	0	0	0	0	1	0	0	0	0	0	0	0	0	0		1	1	1	1	1	1	1	1	2	1	1	1	1	1	1	1	1	1		0.9176	0.379478	0.849979	0.921065	0.655136	0.406934	0.283286	0.61885	0.976801
lpg0140, lpg0518, lpg0879, lpg1148, lpg2692, lpg2806, lpg2815	7	1	0	0	0	0	0	0	0	0	0	0	0	0	0	0	0	1	0	0		1	1	1	1	1	1	1	1	1	1	1	1	1	1	1	2	1	1		0.9176	0.379478	0.849979	0.921065	0.655136	0.406934	0.283286	0.61885	0.4884
lpg0140, lpg0518, lpg0879, lpg1148, lpg2692, lpg2815	6	1	0	0	0	0	0	1	0	0	0	0	0	0	0	0	0	0	0	0		1	1	1	1	1	2	1	1	1	1	1	1	1	1	1	1	1	1		0.9176	0.379478	0.849979	0.921065	0.655136	0.813868	0.283286	0.61885	0.4884
lpg0140, lpg0518, lpg0879, lpg1702, lpg1776, lpg2244, lpg2692, lpg2806, lpg2815	9	4	0	0	0	0	0	1	0	0	0	0	0	0	0	0	1	2	0	1		1	1	1	1	1	2	1	1	1	1	1	1	1	1	2	3	1	2		0.9176	0.379478	0.849979	0.921065	0.655136	0.813868	0.283286	0.61885	0.4884
lpg0140, lpg0518, lpg0879, lpg1702, lpg1776, lpg2244, lpg2806, lpg2815	8	2	0	0	0	0	0	0	0	0	0	0	0	0	0	0	0	1	1	0		1	1	1	1	1	1	1	1	1	1	1	1	1	1	1	2	2	1		0.9176	0.379478	0.849979	0.921065	0.655136	0.406934	0.283286	0.61885	0.4884
lpg0140, lpg0518, lpg0879, lpg1702, lpg1776, lpg2806	6	1	0	0	0	0	0	0	0	0	0	0	0	0	0	0	0	0	0	1		1	1	1	1	1	1	1	1	1	1	1	1	1	1	1	1	1	2		0.9176	0.379478	0.849979	0.921065	0.655136	0.406934	0.283286	0.61885	0.4884
lpg0140, lpg0518, lpg0879, lpg1702, lpg1776, lpg2815	6	1	0	0	0	0	0	0	0	0	0	0	0	0	0	0	0	0	1	0		1	1	1	1	1	1	1	1	1	1	1	1	1	1	1	1	2	1		0.9176	0.379478	0.849979	0.921065	0.655136	0.406934	0.283286	0.61885	0.4884
lpg0140, lpg0518, lpg0879, lpg1702, lpg2244, lpg2692, lpg2806, lpg2815	8	2	0	0	0	0	0	1	0	0	0	0	0	0	0	0	0	1	0	0		1	1	1	1	1	2	1	1	1	1	1	1	1	1	1	2	1	1		0.9176	0.379478	0.849979	0.921065	0.655136	0.813868	0.283286	0.61885	0.4884
lpg0140, lpg0518, lpg0879, lpg1702, lpg2815	5	1	0	0	0	0	0	0	0	0	0	0	0	0	0	0	0	1	0	0		1	1	1	1	1	1	1	1	1	1	1	1	1	1	1	2	1	1		0.9176	0.379478	0.849979	0.921065	0.655136	0.406934	0.283286	0.61885	0.4884
lpg0140, lpg0518, lpg0879, lpg1776, lpg2244, lpg2692, lpg2806	7	1	0	0	0	0	0	0	0	0	1	0	0	0	0	0	0	0	0	0		1	1	1	1	1	1	1	1	2	1	1	1	1	1	1	1	1	1		0.9176	0.379478	0.849979	0.921065	0.655136	0.406934	0.283286	0.61885	0.976801
lpg0140, lpg0518, lpg0879, lpg1776, lpg2806, lpg2815	6	1	0	0	0	0	0	0	0	0	1	0	0	0	0	0	0	0	0	0		1	1	1	1	1	1	1	1	2	1	1	1	1	1	1	1	1	1		0.9176	0.379478	0.849979	0.921065	0.655136	0.406934	0.283286	0.61885	0.976801
lpg0140, lpg0518, lpg0879, lpg2244, lpg2692, lpg2806, lpg2815	7	1	0	0	0	0	0	0	0	0	1	0	0	0	0	0	0	0	0	0		1	1	1	1	1	1	1	1	2	1	1	1	1	1	1	1	1	1		0.9176	0.379478	0.849979	0.921065	0.655136	0.406934	0.283286	0.61885	0.976801
lpg0140, lpg0518, lpg0879, lpg2888	4	4	0	0	0	0	0	0	1	1	0	2	0	0	0	0	0	2	0	0		1	1	1	1	1	1	2	2	1	3	1	1	1	1	1	3	1	1		0.9176	0.379478	0.849979	0.921065	0.655136	0.406934	0.566572	1.2377	0.4884
lpg0140, lpg0518, lpg1148, lpg1702, lpg1776, lpg2244, lpg2692, lpg2806	8	1	0	0	0	0	0	1	0	0	0	0	0	0	0	0	0	0	0	0		1	1	1	1	1	2	1	1	1	1	1	1	1	1	1	1	1	1		0.9176	0.379478	0.849979	0.921065	0.655136	0.813868	0.283286	0.61885	0.4884
lpg0140, lpg0518, lpg1148, lpg1702, lpg1776, lpg2244, lpg2692, lpg2806, lpg2815	9	3	0	0	0	0	0	0	0	0	0	0	0	0	0	0	1	1	1	0		1	1	1	1	1	1	1	1	1	1	1	1	1	1	2	2	2	1		0.9176	0.379478	0.849979	0.921065	0.655136	0.406934	0.283286	0.61885	0.4884
lpg0140, lpg0518, lpg1148, lpg1702, lpg1776, lpg2244, lpg2692, lpg2815	8	1	0	0	0	0	0	0	0	0	1	0	0	0	0	0	0	0	0	0		1	1	1	1	1	1	1	1	2	1	1	1	1	1	1	1	1	1		0.9176	0.379478	0.849979	0.921065	0.655136	0.406934	0.283286	0.61885	0.976801
lpg0140, lpg0518, lpg1148, lpg1702, lpg1776, lpg2692, lpg2815	7	1	0	0	0	0	0	0	0	0	0	0	0	0	0	0	0	1	0	0		1	1	1	1	1	1	1	1	1	1	1	1	1	1	1	2	1	1		0.9176	0.379478	0.849979	0.921065	0.655136	0.406934	0.283286	0.61885	0.4884
lpg0140, lpg0518, lpg1148, lpg1702, lpg1776, lpg2806	6	1	0	0	0	0	0	1	0	0	0	0	0	0	0	0	0	0	0	0		1	1	1	1	1	2	1	1	1	1	1	1	1	1	1	1	1	1		0.9176	0.379478	0.849979	0.921065	0.655136	0.813868	0.283286	0.61885	0.4884
lpg0140, lpg0518, lpg1148, lpg1702, lpg1776, lpg2806, lpg2815	7	1	0	0	0	0	0	0	0	0	0	0	0	0	0	0	0	0	1	0		1	1	1	1	1	1	1	1	1	1	1	1	1	1	1	1	2	1		0.9176	0.379478	0.849979	0.921065	0.655136	0.406934	0.283286	0.61885	0.4884
lpg0140, lpg0518, lpg1148, lpg1702, lpg2244	5	1	0	0	0	0	0	0	0	0	1	0	0	0	0	0	0	0	0	0		1	1	1	1	1	1	1	1	2	1	1	1	1	1	1	1	1	1		0.9176	0.379478	0.849979	0.921065	0.655136	0.406934	0.283286	0.61885	0.976801
lpg0140, lpg0518, lpg1148, lpg1702, lpg2244, lpg2806, lpg2815	7	1	0	0	0	0	0	0	0	0	0	0	0	0	0	0	0	0	0	1		1	1	1	1	1	1	1	1	1	1	1	1	1	1	1	1	1	2		0.9176	0.379478	0.849979	0.921065	0.655136	0.406934	0.283286	0.61885	0.4884
lpg0140, lpg0518, lpg1148, lpg1776, lpg2692, lpg2815	6	1	0	0	0	0	0	0	0	0	0	0	0	0	0	0	1	0	0	0		1	1	1	1	1	1	1	1	1	1	1	1	1	1	2	1	1	1		0.9176	0.379478	0.849979	0.921065	0.655136	0.406934	0.283286	0.61885	0.4884
lpg0140, lpg0518, lpg1776, lpg2244, lpg2806, lpg2815	6	1	0	0	0	0	0	0	0	0	0	0	0	0	0	0	0	1	0	0		1	1	1	1	1	1	1	1	1	1	1	1	1	1	1	2	1	1		0.9176	0.379478	0.849979	0.921065	0.655136	0.406934	0.283286	0.61885	0.4884
lpg0140, lpg0518, lpg2815	3	5	0	0	0	0	0	5	0	0	3	0	0	0	0	0	6	6	0	2		1	1	1	1	1	6	1	1	4	1	1	1	1	1	7	7	1	3		0.9176	0.379478	0.849979	0.921065	0.655136	2.4416	0.283286	0.61885	1.9536
lpg0140, lpg0518, lpg2888	3	1	0	0	0	0	0	0	1	0	0	0	0	0	0	0	0	0	0	0		1	1	1	1	1	1	2	1	1	1	1	1	1	1	1	1	1	1		0.9176	0.379478	0.849979	0.921065	0.655136	0.406934	0.566572	0.61885	0.4884
lpg0140, lpg0621	2	9	0	0	0	0	0	2	3	2	1	6	0	0	0	0	3	7	1	3		1	1	1	1	1	3	4	3	2	7	1	1	1	1	4	8	2	4		0.9176	0.379478	0.849979	0.921065	0.655136	1.2208	1.13314	1.85655	0.976801
lpg0140, lpg0621, lpg0963	3	9	0	0	0	0	0	7	11	9	27	59	0	0	0	0	6	27	5	5		1	1	1	1	1	8	12	10	28	60	1	1	1	1	7	28	6	6		0.9176	0.379478	0.849979	0.921065	0.655136	3.25547	3.39943	6.1885	13.6752
lpg0140, lpg0621, lpg0963, lpg2584, lpg2885	5	1	0	0	0	0	0	0	0	0	0	0	0	0	0	0	0	0	1	0		1	1	1	1	1	1	1	1	1	1	1	1	1	1	1	1	2	1		0.9176	0.379478	0.849979	0.921065	0.655136	0.406934	0.283286	0.61885	0.4884
lpg0140, lpg0621, lpg1701	3	1	0	0	2	0	0	0	0	0	0	0	0	0	0	0	0	0	0	0		1	1	3	1	1	1	1	1	1	1	1	1	1	1	1	1	1	1		0.9176	0.379478	2.54994	0.921065	0.655136	0.406934	0.283286	0.61885	0.4884
lpg0140, lpg0621, lpg1701, lpg1907	4	4	0	2	0	0	1	0	0	0	0	0	2	0	0	2	0	0	0	0		1	3	1	1	2	1	1	1	1	1	3	1	1	3	1	1	1	1		0.9176	1.13843	0.849979	0.921065	1.31027	0.406934	0.283286	0.61885	0.4884
lpg0140, lpg0621, lpg1701, lpg1907, lpg3000	5	9	4	23	19	10	14	0	0	0	0	0	7	5	12	20	0	0	0	0		5	24	20	11	15	1	1	1	1	1	8	6	13	21	1	1	1	1		4.588	9.10747	16.9996	10.1317	9.82704	0.406934	0.283286	0.61885	0.4884
lpg0140, lpg0621, lpg1701, lpg3000	4	6	0	2	1	2	1	0	0	0	0	0	2	0	3	0	0	0	0	0		1	3	2	3	2	1	1	1	1	1	3	1	4	1	1	1	1	1		0.9176	1.13843	1.69996	2.76319	1.31027	0.406934	0.283286	0.61885	0.4884
lpg0140, lpg0621, lpg1776, lpg1959, lpg2884, lpg2885	6	1	0	0	0	0	0	0	0	0	0	0	0	0	1	0	0	0	0	0		1	1	1	1	1	1	1	1	1	1	1	1	2	1	1	1	1	1		0.9176	0.379478	0.849979	0.921065	0.655136	0.406934	0.283286	0.61885	0.4884
lpg0140, lpg0621, lpg1907	3	2	0	1	0	1	0	0	0	0	0	0	0	0	0	0	0	0	0	0		1	2	1	2	1	1	1	1	1	1	1	1	1	1	1	1	1	1		0.9176	0.758956	0.849979	1.84213	0.655136	0.406934	0.283286	0.61885	0.4884
lpg0140, lpg0621, lpg1907, lpg3000	4	5	0	2	2	1	0	0	0	0	0	0	0	1	0	2	0	0	0	0		1	3	3	2	1	1	1	1	1	1	1	2	1	3	1	1	1	1		0.9176	1.13843	2.54994	1.84213	0.655136	0.406934	0.283286	0.61885	0.4884
lpg0140, lpg0621, lpg2815	3	5	0	0	0	0	0	4	0	0	1	0	0	0	0	0	4	1	1	0		1	1	1	1	1	5	1	1	2	1	1	1	1	1	5	2	2	1		0.9176	0.379478	0.849979	0.921065	0.655136	2.03467	0.283286	0.61885	0.976801
lpg0140, lpg0716, lpg2552	3	1	0	0	0	0	0	0	1	0	0	0	0	0	0	0	0	0	0	0		1	1	1	1	1	1	2	1	1	1	1	1	1	1	1	1	1	1		0.9176	0.379478	0.849979	0.921065	0.655136	0.406934	0.566572	0.61885	0.4884
lpg0140, lpg0879	2	8	0	0	0	0	0	4	11	6	1	12	0	0	0	0	1	3	1	0		1	1	1	1	1	5	12	7	2	13	1	1	1	1	2	4	2	1		0.9176	0.379478	0.849979	0.921065	0.655136	2.03467	3.39943	4.33195	0.976801
lpg0140, lpg0879, lpg1148, lpg1702, lpg1776, lpg2244, lpg2692, lpg2806, lpg2815	9	1	0	0	0	0	0	1	0	0	0	0	0	0	0	0	0	0	0	0		1	1	1	1	1	2	1	1	1	1	1	1	1	1	1	1	1	1		0.9176	0.379478	0.849979	0.921065	0.655136	0.813868	0.283286	0.61885	0.4884
lpg0140, lpg0879, lpg1148, lpg1702, lpg1776, lpg2244, lpg2692, lpg2815	8	1	0	0	0	0	0	0	0	0	1	0	0	0	0	0	0	0	0	0		1	1	1	1	1	1	1	1	2	1	1	1	1	1	1	1	1	1		0.9176	0.379478	0.849979	0.921065	0.655136	0.406934	0.283286	0.61885	0.976801
lpg0140, lpg0879, lpg1148, lpg1702, lpg1776, lpg2244, lpg2815	7	1	0	0	0	0	0	1	0	0	0	0	0	0	0	0	0	0	0	0		1	1	1	1	1	2	1	1	1	1	1	1	1	1	1	1	1	1		0.9176	0.379478	0.849979	0.921065	0.655136	0.813868	0.283286	0.61885	0.4884
lpg0140, lpg0879, lpg1148, lpg1702, lpg1776, lpg2692, lpg2815	7	1	0	0	0	0	0	0	0	0	0	0	0	0	0	0	1	0	0	0		1	1	1	1	1	1	1	1	1	1	1	1	1	1	2	1	1	1		0.9176	0.379478	0.849979	0.921065	0.655136	0.406934	0.283286	0.61885	0.4884
lpg0140, lpg0879, lpg1148, lpg1702, lpg2692, lpg2806, lpg2815	7	1	0	0	0	0	0	0	0	0	0	0	0	0	0	0	1	0	0	0		1	1	1	1	1	1	1	1	1	1	1	1	1	1	2	1	1	1		0.9176	0.379478	0.849979	0.921065	0.655136	0.406934	0.283286	0.61885	0.4884
lpg0140, lpg0879, lpg1148, lpg2244, lpg2692, lpg2806, lpg2815	7	1	0	0	0	0	0	0	0	0	0	0	0	0	0	0	0	0	1	0		1	1	1	1	1	1	1	1	1	1	1	1	1	1	1	1	2	1		0.9176	0.379478	0.849979	0.921065	0.655136	0.406934	0.283286	0.61885	0.4884
lpg0140, lpg0879, lpg1661	3	9	0	0	0	0	0	15	43	26	10	52	0	0	0	0	7	10	7	5		1	1	1	1	1	16	44	27	11	53	1	1	1	1	8	11	8	6		0.9176	0.379478	0.849979	0.921065	0.655136	6.51095	12.4646	16.709	5.37241
lpg0140, lpg0879, lpg1702, lpg1776, lpg2244, lpg2806, lpg2815	7	1	0	0	0	0	0	0	0	0	0	0	0	0	0	0	0	1	0	0		1	1	1	1	1	1	1	1	1	1	1	1	1	1	1	2	1	1		0.9176	0.379478	0.849979	0.921065	0.655136	0.406934	0.283286	0.61885	0.4884
lpg0140, lpg0879, lpg1702, lpg1776, lpg2692, lpg2806, lpg2815	7	1	0	0	0	0	0	1	0	0	0	0	0	0	0	0	0	0	0	0		1	1	1	1	1	2	1	1	1	1	1	1	1	1	1	1	1	1		0.9176	0.379478	0.849979	0.921065	0.655136	0.813868	0.283286	0.61885	0.4884
lpg0140, lpg0879, lpg2888	3	1	0	0	0	0	0	0	0	0	0	1	0	0	0	0	0	0	0	0		1	1	1	1	1	1	1	1	1	2	1	1	1	1	1	1	1	1		0.9176	0.379478	0.849979	0.921065	0.655136	0.406934	0.283286	0.61885	0.4884
lpg0140, lpg0963	2	17	1	10	8	1	2	1	2	2	2	11	1	0	1	6	2	4	1	4		2	11	9	2	3	2	3	3	3	12	2	1	2	7	3	5	2	5		1.8352	4.17426	7.64981	1.84213	1.96541	0.813868	0.849858	1.85655	1.4652
lpg0140, lpg0963, lpg1099, lpg1959, lpg2244, lpg2271, lpg2804	7	1	0	0	0	0	0	0	0	0	0	0	0	0	1	0	0	0	0	0		1	1	1	1	1	1	1	1	1	1	1	1	2	1	1	1	1	1		0.9176	0.379478	0.849979	0.921065	0.655136	0.406934	0.283286	0.61885	0.4884
lpg0140, lpg0963, lpg1137	3	9	0	0	0	0	0	7	18	13	1	11	0	0	0	0	2	10	6	4		1	1	1	1	1	8	19	14	2	12	1	1	1	1	3	11	7	5		0.9176	0.379478	0.849979	0.921065	0.655136	3.25547	5.38244	8.6639	0.976801
lpg0140, lpg0963, lpg1525	3	9	3	36	19	8	19	0	0	0	0	0	7	6	7	13	0	0	0	0		4	37	20	9	20	1	1	1	1	1	8	7	8	14	1	1	1	1		3.6704	14.0407	16.9996	8.28958	13.1027	0.406934	0.283286	0.61885	0.4884
lpg0140, lpg0963, lpg1525, lpg2223, lpg2552, lpg2888	6	1	0	0	0	1	0	0	0	0	0	0	0	0	0	0	0	0	0	0		1	1	1	2	1	1	1	1	1	1	1	1	1	1	1	1	1	1		0.9176	0.379478	0.849979	1.84213	0.655136	0.406934	0.283286	0.61885	0.4884
lpg0140, lpg0963, lpg1661, lpg2223, lpg2552, lpg2888	6	1	0	0	0	1	0	0	0	0	0	0	0	0	0	0	0	0	0	0		1	1	1	2	1	1	1	1	1	1	1	1	1	1	1	1	1	1		0.9176	0.379478	0.849979	1.84213	0.655136	0.406934	0.283286	0.61885	0.4884
lpg0140, lpg0963, lpg1959	3	3	0	2	0	0	1	0	0	0	0	0	0	0	0	1	0	0	0	0		1	3	1	1	2	1	1	1	1	1	1	1	1	2	1	1	1	1		0.9176	1.13843	0.849979	0.921065	1.31027	0.406934	0.283286	0.61885	0.4884
lpg0140, lpg0963, lpg1959, lpg2244	4	8	0	3	2	2	1	0	0	0	0	0	1	1	1	2	0	0	0	0		1	4	3	3	2	1	1	1	1	1	2	2	2	3	1	1	1	1		0.9176	1.51791	2.54994	2.76319	1.31027	0.406934	0.283286	0.61885	0.4884
lpg0140, lpg0963, lpg1959, lpg2244, lpg2804	5	9	4	25	23	16	13	0	0	0	0	0	11	15	19	38	0	0	0	0		5	26	24	17	14	1	1	1	1	1	12	16	20	39	1	1	1	1		4.588	9.86642	20.3995	15.6581	9.17191	0.406934	0.283286	0.61885	0.4884
lpg0140, lpg0963, lpg1959, lpg2804	4	6	1	4	1	1	1	0	0	0	0	0	0	0	0	4	0	0	0	0		2	5	2	2	2	1	1	1	1	1	1	1	1	5	1	1	1	1		1.8352	1.89739	1.69996	1.84213	1.31027	0.406934	0.283286	0.61885	0.4884
lpg0140, lpg0963, lpg1959, lpg3000	4	9	3	15	9	3	1	0	0	0	0	0	2	1	2	2	0	0	0	0		4	16	10	4	2	1	1	1	1	1	3	2	3	3	1	1	1	1		3.6704	6.07165	8.49979	3.68426	1.31027	0.406934	0.283286	0.61885	0.4884
lpg0140, lpg0963, lpg2223, lpg2552, lpg2584, lpg2888, lpg3000	7	1	0	0	0	1	0	0	0	0	0	0	0	0	0	0	0	0	0	0		1	1	1	2	1	1	1	1	1	1	1	1	1	1	1	1	1	1		0.9176	0.379478	0.849979	1.84213	0.655136	0.406934	0.283286	0.61885	0.4884
lpg0140, lpg0963, lpg2223, lpg2552, lpg2888, lpg3000	6	1	0	0	0	0	0	0	0	0	0	0	0	0	1	0	0	0	0	0		1	1	1	1	1	1	1	1	1	1	1	1	2	1	1	1	1	1		0.9176	0.379478	0.849979	0.921065	0.655136	0.406934	0.283286	0.61885	0.4884
lpg0140, lpg0963, lpg2244	3	2	0	0	0	0	0	0	0	0	0	0	0	1	0	1	0	0	0	0		1	1	1	1	1	1	1	1	1	1	1	2	1	2	1	1	1	1		0.9176	0.379478	0.849979	0.921065	0.655136	0.406934	0.283286	0.61885	0.4884
lpg0140, lpg0963, lpg2244, lpg2804	4	4	0	2	1	0	0	0	0	0	0	0	0	2	0	4	0	0	0	0		1	3	2	1	1	1	1	1	1	1	1	3	1	5	1	1	1	1		0.9176	1.13843	1.69996	0.921065	0.655136	0.406934	0.283286	0.61885	0.4884
lpg0140, lpg0963, lpg2804	3	1	0	0	1	0	0	0	0	0	0	0	0	0	0	0	0	0	0	0		1	1	2	1	1	1	1	1	1	1	1	1	1	1	1	1	1	1		0.9176	0.379478	1.69996	0.921065	0.655136	0.406934	0.283286	0.61885	0.4884
lpg0140, lpg1099	2	14	4	0	1	3	0	7	19	7	10	18	1	0	2	5	0	4	3	2		5	1	2	4	1	8	20	8	11	19	2	1	3	6	1	5	4	3		4.588	0.379478	1.69996	3.68426	0.655136	3.25547	5.66572	4.9508	5.37241
lpg0140, lpg1099, lpg1776, lpg2244, lpg2584	5	1	0	0	0	0	0	0	0	0	0	0	0	0	0	1	0	0	0	0		1	1	1	1	1	1	1	1	1	1	1	1	1	2	1	1	1	1		0.9176	0.379478	0.849979	0.921065	0.655136	0.406934	0.283286	0.61885	0.4884
lpg0140, lpg1099, lpg1959	3	6	0	2	1	1	0	0	0	0	0	0	0	1	1	2	0	0	0	0		1	3	2	2	1	1	1	1	1	1	1	2	2	3	1	1	1	1		0.9176	1.13843	1.69996	1.84213	0.655136	0.406934	0.283286	0.61885	0.4884
lpg0140, lpg1099, lpg1959, lpg2223, lpg2806, lpg2815	6	1	0	0	0	1	0	0	0	0	0	0	0	0	0	0	0	0	0	0		1	1	1	2	1	1	1	1	1	1	1	1	1	1	1	1	1	1		0.9176	0.379478	0.849979	1.84213	0.655136	0.406934	0.283286	0.61885	0.4884
lpg0140, lpg1099, lpg1959, lpg2806	4	9	3	24	21	13	19	0	0	0	0	0	8	4	15	31	0	0	0	0		4	25	22	14	20	1	1	1	1	1	9	5	16	32	1	1	1	1		3.6704	9.48695	18.6995	12.8949	13.1027	0.406934	0.283286	0.61885	0.4884
lpg0140, lpg1099, lpg2552, lpg2584, lpg2884	5	1	0	0	0	0	0	0	1	0	0	0	0	0	0	0	0	0	0	0		1	1	1	1	1	1	2	1	1	1	1	1	1	1	1	1	1	1		0.9176	0.379478	0.849979	0.921065	0.655136	0.406934	0.566572	0.61885	0.4884
lpg0140, lpg1099, lpg2584	3	11	0	2	0	0	0	37	128	59	41	135	0	0	1	0	21	45	17	19		1	3	1	1	1	38	129	60	42	136	1	1	2	1	22	46	18	20		0.9176	1.13843	0.849979	0.921065	0.655136	15.4635	36.5439	37.131	20.5128
lpg0140, lpg1099, lpg2584, lpg2874	4	9	3	10	4	6	8	0	0	0	0	0	2	1	7	11	0	0	0	0		4	11	5	7	9	1	1	1	1	1	3	2	8	12	1	1	1	1		3.6704	4.17426	4.24989	6.44745	5.89623	0.406934	0.283286	0.61885	0.4884
lpg0140, lpg1099, lpg2806	3	6	0	4	2	2	1	0	0	0	0	0	0	1	0	3	0	0	0	0		1	5	3	3	2	1	1	1	1	1	1	2	1	4	1	1	1	1		0.9176	1.89739	2.54994	2.76319	1.31027	0.406934	0.283286	0.61885	0.4884
lpg0140, lpg1099, lpg2815	3	6	5	0	0	6	0	0	0	0	0	0	5	3	11	6	0	0	0	0		6	1	1	7	1	1	1	1	1	1	6	4	12	7	1	1	1	1		5.5056	0.379478	0.849979	6.44745	0.655136	0.406934	0.283286	0.61885	0.4884
lpg0140, lpg1099, lpg2874	3	7	1	2	1	0	1	0	0	0	0	0	0	1	2	4	0	0	0	0		2	3	2	1	2	1	1	1	1	1	1	2	3	5	1	1	1	1		1.8352	1.13843	1.69996	0.921065	1.31027	0.406934	0.283286	0.61885	0.4884
lpg0140, lpg1137	2	6	0	0	0	0	0	2	4	6	0	4	0	0	0	0	1	5	0	0		1	1	1	1	1	3	5	7	1	5	1	1	1	1	2	6	1	1		0.9176	0.379478	0.849979	0.921065	0.655136	1.2208	1.41643	4.33195	0.4884
lpg0140, lpg1137, lpg1701	3	9	0	0	0	0	0	9	66	14	12	22	0	0	0	0	10	21	10	15		1	1	1	1	1	10	67	15	13	23	1	1	1	1	11	22	11	16		0.9176	0.379478	0.849979	0.921065	0.655136	4.06934	18.9802	9.28275	6.34921
lpg0140, lpg1148	2	4	0	0	0	0	0	1	3	3	0	2	0	0	0	0	0	0	0	0		1	1	1	1	1	2	4	4	1	3	1	1	1	1	1	1	1	1		0.9176	0.379478	0.849979	0.921065	0.655136	0.813868	1.13314	2.4754	0.4884
lpg0140, lpg1148, lpg1701	3	10	0	0	0	0	0	9	48	28	5	28	0	0	1	0	10	13	7	5		1	1	1	1	1	10	49	29	6	29	1	1	2	1	11	14	8	6		0.9176	0.379478	0.849979	0.921065	0.655136	4.06934	13.881	17.9467	2.9304
lpg0140, lpg1525	2	7	0	3	4	2	1	0	0	0	0	0	0	1	1	3	0	0	0	0		1	4	5	3	2	1	1	1	1	1	1	2	2	4	1	1	1	1		0.9176	1.51791	4.24989	2.76319	1.31027	0.406934	0.283286	0.61885	0.4884
lpg0140, lpg1525, lpg1776	3	2	0	0	0	0	0	0	0	0	0	0	1	0	2	0	0	0	0	0		1	1	1	1	1	1	1	1	1	1	2	1	3	1	1	1	1	1		0.9176	0.379478	0.849979	0.921065	0.655136	0.406934	0.283286	0.61885	0.4884
lpg0140, lpg1525, lpg1776, lpg2884	4	6	1	2	2	2	1	0	0	0	0	0	0	0	2	0	0	0	0	0		2	3	3	3	2	1	1	1	1	1	1	1	3	1	1	1	1	1		1.8352	1.13843	2.54994	2.76319	1.31027	0.406934	0.283286	0.61885	0.4884
lpg0140, lpg1525, lpg2884	3	2	0	0	1	0	0	0	0	0	0	0	0	0	1	0	0	0	0	0		1	1	2	1	1	1	1	1	1	1	1	1	2	1	1	1	1	1		0.9176	0.379478	1.69996	0.921065	0.655136	0.406934	0.283286	0.61885	0.4884
lpg0140, lpg1621	2	4	1	4	2	0	0	0	0	0	0	0	0	1	0	0	0	0	0	0		2	5	3	1	1	1	1	1	1	1	1	2	1	1	1	1	1	1		1.8352	1.89739	2.54994	0.921065	0.655136	0.406934	0.283286	0.61885	0.4884
lpg0140, lpg1621, lpg1776	3	6	1	7	3	0	2	0	0	0	0	0	0	0	3	3	0	0	0	0		2	8	4	1	3	1	1	1	1	1	1	1	4	4	1	1	1	1		1.8352	3.03582	3.39992	0.921065	1.96541	0.406934	0.283286	0.61885	0.4884
lpg0140, lpg1621, lpg2244, lpg2584	4	1	0	0	0	0	0	0	0	0	0	0	0	0	0	0	0	0	0	1		1	1	1	1	1	1	1	1	1	1	1	1	1	1	1	1	1	2		0.9176	0.379478	0.849979	0.921065	0.655136	0.406934	0.283286	0.61885	0.4884
lpg0140, lpg1661	2	11	0	3	2	1	3	0	3	2	1	4	0	3	2	1	0	0	0	0		1	4	3	2	4	1	4	3	2	5	1	4	3	2	1	1	1	1		0.9176	1.51791	2.54994	1.84213	2.62055	0.406934	1.13314	1.85655	0.976801
lpg0140, lpg1661, lpg1776, lpg2244	4	1	0	0	0	0	0	0	1	0	0	0	0	0	0	0	0	0	0	0		1	1	1	1	1	1	2	1	1	1	1	1	1	1	1	1	1	1		0.9176	0.379478	0.849979	0.921065	0.655136	0.406934	0.566572	0.61885	0.4884
lpg0140, lpg1661, lpg1907, lpg1959, lpg2244	5	1	0	0	0	0	0	0	0	0	0	0	0	0	1	0	0	0	0	0		1	1	1	1	1	1	1	1	1	1	1	1	2	1	1	1	1	1		0.9176	0.379478	0.849979	0.921065	0.655136	0.406934	0.283286	0.61885	0.4884
lpg0140, lpg1661, lpg2223	3	9	9	58	21	10	19	0	0	0	0	0	8	19	7	18	0	0	0	0		10	59	22	11	20	1	1	1	1	1	9	20	8	19	1	1	1	1		9.176	22.3892	18.6995	10.1317	13.1027	0.406934	0.283286	0.61885	0.4884
lpg0140, lpg1689	2	3	0	6	0	0	0	0	0	0	0	0	1	1	0	0	0	0	0	0		1	7	1	1	1	1	1	1	1	1	2	2	1	1	1	1	1	1		0.9176	2.65634	0.849979	0.921065	0.655136	0.406934	0.283286	0.61885	0.4884
lpg0140, lpg1689, lpg1701, lpg1959, lpg2244	5	2	0	2	0	0	0	0	0	0	0	0	0	0	0	1	0	0	0	0		1	3	1	1	1	1	1	1	1	1	1	1	1	2	1	1	1	1		0.9176	1.13843	0.849979	0.921065	0.655136	0.406934	0.283286	0.61885	0.4884
lpg0140, lpg1689, lpg1701, lpg1959, lpg2244, lpg2884	6	5	1	0	0	0	0	0	0	0	0	0	2	1	1	3	0	0	0	0		2	1	1	1	1	1	1	1	1	1	3	2	2	4	1	1	1	1		1.8352	0.379478	0.849979	0.921065	0.655136	0.406934	0.283286	0.61885	0.4884
lpg0140, lpg1689, lpg1701, lpg2244, lpg2884	5	1	0	0	0	0	0	0	0	0	0	0	0	0	0	2	0	0	0	0		1	1	1	1	1	1	1	1	1	1	1	1	1	3	1	1	1	1		0.9176	0.379478	0.849979	0.921065	0.655136	0.406934	0.283286	0.61885	0.4884
lpg0140, lpg1689, lpg2552, lpg2806	4	1	0	0	1	0	0	0	0	0	0	0	0	0	0	0	0	0	0	0		1	1	2	1	1	1	1	1	1	1	1	1	1	1	1	1	1	1		0.9176	0.379478	1.69996	0.921065	0.655136	0.406934	0.283286	0.61885	0.4884
lpg0140, lpg1689, lpg2804, lpg2806, lpg2885	5	1	0	0	0	1	0	0	0	0	0	0	0	0	0	0	0	0	0	0		1	1	1	2	1	1	1	1	1	1	1	1	1	1	1	1	1	1		0.9176	0.379478	0.849979	1.84213	0.655136	0.406934	0.283286	0.61885	0.4884
lpg0140, lpg1689, lpg2806	3	9	3	19	10	8	7	0	0	0	0	0	2	17	4	4	0	0	0	0		4	20	11	9	8	1	1	1	1	1	3	18	5	5	1	1	1	1		3.6704	7.58956	9.34977	8.28958	5.24109	0.406934	0.283286	0.61885	0.4884
lpg0140, lpg1689, lpg2874	3	4	0	1	1	1	0	0	0	0	0	0	0	1	0	0	0	0	0	0		1	2	2	2	1	1	1	1	1	1	1	2	1	1	1	1	1	1		0.9176	0.758956	1.69996	1.84213	0.655136	0.406934	0.283286	0.61885	0.4884
lpg0140, lpg1689, lpg2874, lpg3000	4	8	4	20	9	7	5	0	0	0	0	0	0	2	3	2	0	0	0	0		5	21	10	8	6	1	1	1	1	1	1	3	4	3	1	1	1	1		4.588	7.96903	8.49979	7.36852	3.93082	0.406934	0.283286	0.61885	0.4884
lpg0140, lpg1689, lpg3000	3	5	1	8	0	0	1	0	0	0	0	0	0	1	0	0	1	0	0	0		2	9	1	1	2	1	1	1	1	1	1	2	1	1	2	1	1	1		1.8352	3.4153	0.849979	0.921065	1.31027	0.406934	0.283286	0.61885	0.4884
lpg0140, lpg1701	2	15	7	96	36	7	14	5	28	7	2	5	4	16	7	22	0	14	0	0		8	97	37	8	15	6	29	8	3	6	5	17	8	23	1	15	1	1		7.3408	36.8094	31.4492	7.36852	9.82704	2.4416	8.2153	4.9508	1.4652
lpg0140, lpg1701, lpg1907	3	3	0	3	0	0	0	0	0	0	0	0	1	1	0	0	0	0	0	0		1	4	1	1	1	1	1	1	1	1	2	2	1	1	1	1	1	1		0.9176	1.51791	0.849979	0.921065	0.655136	0.406934	0.283286	0.61885	0.4884
lpg0140, lpg1701, lpg1907, lpg3000	4	6	1	7	2	0	1	0	0	0	0	0	0	0	1	2	0	0	0	0		2	8	3	1	2	1	1	1	1	1	1	1	2	3	1	1	1	1		1.8352	3.03582	2.54994	0.921065	1.31027	0.406934	0.283286	0.61885	0.4884
lpg0140, lpg1701, lpg1959, lpg2884	4	1	0	1	0	0	0	0	0	0	0	0	0	0	0	0	0	0	0	0		1	2	1	1	1	1	1	1	1	1	1	1	1	1	1	1	1	1		0.9176	0.758956	0.849979	0.921065	0.655136	0.406934	0.283286	0.61885	0.4884
lpg0140, lpg1701, lpg3000	3	11	0	1	0	0	0	11	36	11	4	21	0	0	1	0	5	49	1	8		1	2	1	1	1	12	37	12	5	22	1	1	2	1	6	50	2	9		0.9176	0.758956	0.849979	0.921065	0.655136	4.88321	10.4816	7.4262	2.442
lpg0140, lpg1702	2	9	2	10	12	1	1	0	0	0	0	0	1	3	1	3	0	0	0	0		3	11	13	2	2	1	1	1	1	1	2	4	2	4	1	1	1	1		2.7528	4.17426	11.0497	1.84213	1.31027	0.406934	0.283286	0.61885	0.4884
lpg0140, lpg1776	2	12	0	11	3	1	4	0	5	4	2	1	2	0	5	9	0	1	0	0		1	12	4	2	5	1	6	5	3	2	3	1	6	10	1	2	1	1		0.9176	4.55373	3.39992	1.84213	3.27568	0.406934	1.69972	3.09425	1.4652
lpg0140, lpg1776, lpg2244	3	7	2	16	11	1	3	0	0	0	0	0	0	0	2	2	0	0	0	0		3	17	12	2	4	1	1	1	1	1	1	1	3	3	1	1	1	1		2.7528	6.45112	10.1997	1.84213	2.62055	0.406934	0.283286	0.61885	0.4884
lpg0140, lpg1776, lpg2244, lpg2552	4	1	0	1	0	0	0	0	0	0	0	0	0	0	0	0	0	0	0	0		1	2	1	1	1	1	1	1	1	1	1	1	1	1	1	1	1	1		0.9176	0.758956	0.849979	0.921065	0.655136	0.406934	0.283286	0.61885	0.4884
lpg0140, lpg1776, lpg2885	3	9	10	29	7	28	13	0	0	0	0	0	24	11	33	44	0	0	0	0		11	30	8	29	14	1	1	1	1	1	25	12	34	45	1	1	1	1		10.0936	11.3843	6.79983	26.7109	9.17191	0.406934	0.283286	0.61885	0.4884
lpg0140, lpg1907	2	3	0	0	0	1	0	0	2	0	0	0	0	0	1	0	0	0	0	0		1	1	1	2	1	1	3	1	1	1	1	1	2	1	1	1	1	1		0.9176	0.379478	0.849979	1.84213	0.655136	0.406934	0.849858	0.61885	0.4884
lpg0140, lpg1907, lpg2733	3	2	0	0	0	0	0	0	1	1	0	0	0	0	0	0	0	0	0	0		1	1	1	1	1	1	2	2	1	1	1	1	1	1	1	1	1	1		0.9176	0.379478	0.849979	0.921065	0.655136	0.406934	0.566572	1.2377	0.4884
lpg0140, lpg1907, lpg2733, lpg3000	4	1	0	0	0	0	0	0	0	1	0	0	0	0	0	0	0	0	0	0		1	1	1	1	1	1	1	2	1	1	1	1	1	1	1	1	1	1		0.9176	0.379478	0.849979	0.921065	0.655136	0.406934	0.283286	1.2377	0.4884
lpg0140, lpg1907, lpg3000	3	4	0	2	0	0	0	0	0	0	1	1	1	0	0	0	0	0	0	0		1	3	1	1	1	1	1	1	2	2	2	1	1	1	1	1	1	1		0.9176	1.13843	0.849979	0.921065	0.655136	0.406934	0.283286	0.61885	0.976801
lpg0140, lpg1959	2	8	1	8	4	1	2	0	0	0	0	0	0	1	1	4	0	0	0	0		2	9	5	2	3	1	1	1	1	1	1	2	2	5	1	1	1	1		1.8352	3.4153	4.24989	1.84213	1.96541	0.406934	0.283286	0.61885	0.4884
lpg0140, lpg1959, lpg2223	3	6	0	23	4	2	4	0	0	0	0	0	0	7	2	0	0	0	0	0		1	24	5	3	5	1	1	1	1	1	1	8	3	1	1	1	1	1		0.9176	9.10747	4.24989	2.76319	3.27568	0.406934	0.283286	0.61885	0.4884
lpg0140, lpg1959, lpg2244	3	3	0	2	1	0	0	0	0	0	0	0	0	0	0	1	0	0	0	0		1	3	2	1	1	1	1	1	1	1	1	1	1	2	1	1	1	1		0.9176	1.13843	1.69996	0.921065	0.655136	0.406934	0.283286	0.61885	0.4884
lpg0140, lpg1959, lpg2244, lpg2804	4	6	0	3	0	1	0	0	0	0	0	0	2	4	1	5	0	0	0	0		1	4	1	2	1	1	1	1	1	1	3	5	2	6	1	1	1	1		0.9176	1.51791	0.849979	1.84213	0.655136	0.406934	0.283286	0.61885	0.4884
lpg0140, lpg1959, lpg2584	3	10	6	19	4	10	11	0	0	0	0	0	5	5	6	11	1	0	0	0		7	20	5	11	12	1	1	1	1	1	6	6	7	12	2	1	1	1		6.4232	7.58956	4.24989	10.1317	7.86164	0.406934	0.283286	0.61885	0.4884
lpg0140, lpg1959, lpg2806	3	6	3	7	1	4	0	0	0	0	0	0	2	0	0	1	0	0	0	0		4	8	2	5	1	1	1	1	1	1	3	1	1	2	1	1	1	1		3.6704	3.03582	1.69996	4.60532	0.655136	0.406934	0.283286	0.61885	0.4884
lpg0140, lpg1959, lpg3000	3	4	0	5	2	0	1	0	0	0	0	0	1	0	0	0	0	0	0	0		1	6	3	1	2	1	1	1	1	1	2	1	1	1	1	1	1	1		0.9176	2.27687	2.54994	0.921065	1.31027	0.406934	0.283286	0.61885	0.4884
lpg0140, lpg2223	2	8	2	14	11	1	0	0	0	0	0	0	2	5	2	6	0	0	0	0		3	15	12	2	1	1	1	1	1	1	3	6	3	7	1	1	1	1		2.7528	5.69217	10.1997	1.84213	0.655136	0.406934	0.283286	0.61885	0.4884
lpg0140, lpg2223, lpg2552, lpg2692, lpg3000	5	1	0	0	0	0	0	0	1	0	0	0	0	0	0	0	0	0	0	0		1	1	1	1	1	1	2	1	1	1	1	1	1	1	1	1	1	1		0.9176	0.379478	0.849979	0.921065	0.655136	0.406934	0.566572	0.61885	0.4884
lpg0140, lpg2244	2	12	1	3	0	0	1	40	110	0	34	129	0	0	0	2	27	47	24	19		2	4	1	1	2	41	111	1	35	130	1	1	1	3	28	48	25	20		1.8352	1.51791	0.849979	0.921065	1.31027	16.6843	31.4448	0.61885	17.094
lpg0140, lpg2244, lpg2692	3	1	0	0	0	0	0	0	1	0	0	0	0	0	0	0	0	0	0	0		1	1	1	1	1	1	2	1	1	1	1	1	1	1	1	1	1	1		0.9176	0.379478	0.849979	0.921065	0.655136	0.406934	0.566572	0.61885	0.4884
lpg0140, lpg2244, lpg2804	3	1	0	0	1	0	0	0	0	0	0	0	0	0	0	0	0	0	0	0		1	1	2	1	1	1	1	1	1	1	1	1	1	1	1	1	1	1		0.9176	0.379478	1.69996	0.921065	0.655136	0.406934	0.283286	0.61885	0.4884
lpg0140, lpg2271	2	2	0	1	1	0	0	0	0	0	0	0	0	0	0	0	0	0	0	0		1	2	2	1	1	1	1	1	1	1	1	1	1	1	1	1	1	1		0.9176	0.758956	1.69996	0.921065	0.655136	0.406934	0.283286	0.61885	0.4884
lpg0140, lpg2271, lpg2885	3	3	0	1	0	0	1	0	0	0	0	0	1	0	0	0	0	0	0	0		1	2	1	1	2	1	1	1	1	1	2	1	1	1	1	1	1	1		0.9176	0.758956	0.849979	0.921065	1.31027	0.406934	0.283286	0.61885	0.4884
lpg0140, lpg2552	2	13	0	168	82	22	0	18	70	35	13	49	0	0	31	0	12	10	8	9		1	169	83	23	1	19	71	36	14	50	1	1	32	1	13	11	9	10		0.9176	64.1318	70.5482	21.1845	0.655136	7.73175	20.1133	22.2786	6.83761
lpg0140, lpg2552, lpg2692, lpg2733	4	1	0	0	1	0	0	0	0	0	0	0	0	0	0	0	0	0	0	0		1	1	2	1	1	1	1	1	1	1	1	1	1	1	1	1	1	1		0.9176	0.379478	1.69996	0.921065	0.655136	0.406934	0.283286	0.61885	0.4884
lpg0140, lpg2584	2	18	18	210	93	14	40	14	21	5	13	25	9	29	28	36	4	12	8	1		19	211	94	15	41	15	22	6	14	26	10	30	29	37	5	13	9	2		17.4344	80.0698	79.898	13.816	26.8606	6.10401	6.23229	3.7131	6.83761
lpg0140, lpg2584, lpg2815	3	7	0	0	0	0	0	9	0	0	14	0	0	0	1	0	11	13	7	16		1	1	1	1	1	10	1	1	15	1	1	1	2	1	12	14	8	17		0.9176	0.379478	0.849979	0.921065	0.655136	4.06934	0.283286	0.61885	7.32601
lpg0140, lpg2584, lpg2874	3	6	0	2	1	1	0	0	0	0	0	0	1	0	1	4	0	0	0	0		1	3	2	2	1	1	1	1	1	1	2	1	2	5	1	1	1	1		0.9176	1.13843	1.69996	1.84213	0.655136	0.406934	0.283286	0.61885	0.4884
lpg0140, lpg2584, lpg2885	3	9	2	6	2	3	2	0	0	0	0	0	4	8	2	3	0	0	0	0		3	7	3	4	3	1	1	1	1	1	5	9	3	4	1	1	1	1		2.7528	2.65634	2.54994	3.68426	1.96541	0.406934	0.283286	0.61885	0.4884
lpg0140, lpg2628	2	2	0	0	0	0	0	0	1	0	0	0	0	0	0	0	0	1	0	0		1	1	1	1	1	1	2	1	1	1	1	1	1	1	1	2	1	1		0.9176	0.379478	0.849979	0.921065	0.655136	0.406934	0.566572	0.61885	0.4884
lpg0140, lpg2692	2	1	0	0	4	0	0	0	0	0	0	0	0	0	0	0	0	0	0	0		1	1	5	1	1	1	1	1	1	1	1	1	1	1	1	1	1	1		0.9176	0.379478	4.24989	0.921065	0.655136	0.406934	0.283286	0.61885	0.4884
lpg0140, lpg2733	2	1	0	0	27	0	0	0	0	0	0	0	0	0	0	0	0	0	0	0		1	1	28	1	1	1	1	1	1	1	1	1	1	1	1	1	1	1		0.9176	0.379478	23.7994	0.921065	0.655136	0.406934	0.283286	0.61885	0.4884
lpg0140, lpg2806	2	3	1	4	0	0	0	0	0	0	0	0	0	0	1	0	0	0	0	0		2	5	1	1	1	1	1	1	1	1	1	1	2	1	1	1	1	1		1.8352	1.89739	0.849979	0.921065	0.655136	0.406934	0.283286	0.61885	0.4884
lpg0140, lpg2815	2	7	1	0	0	0	0	0	0	0	0	0	1	1	1	3	0	2	0	1		2	1	1	1	1	1	1	1	1	1	2	2	2	4	1	3	1	2		1.8352	0.379478	0.849979	0.921065	0.655136	0.406934	0.283286	0.61885	0.4884
lpg0140, lpg2874	2	3	0	1	1	0	1	0	0	0	0	0	0	0	0	0	0	0	0	0		1	2	2	1	2	1	1	1	1	1	1	1	1	1	1	1	1	1		0.9176	0.758956	1.69996	0.921065	1.31027	0.406934	0.283286	0.61885	0.4884
lpg0140, lpg2874, lpg3000	3	1	0	1	0	0	0	0	0	0	0	0	0	0	0	0	0	0	0	0		1	2	1	1	1	1	1	1	1	1	1	1	1	1	1	1	1	1		0.9176	0.758956	0.849979	0.921065	0.655136	0.406934	0.283286	0.61885	0.4884
lpg0140, lpg2885	2	9	1	6	1	3	1	0	0	0	0	0	3	1	4	4	0	0	0	0		2	7	2	4	2	1	1	1	1	1	4	2	5	5	1	1	1	1		1.8352	2.65634	1.69996	3.68426	1.31027	0.406934	0.283286	0.61885	0.4884
lpg0140, lpg3000	2	7	0	1	0	0	0	0	4	1	0	1	0	0	0	0	1	2	1	0		1	2	1	1	1	1	5	2	1	2	1	1	1	1	2	3	2	1		0.9176	0.758956	0.849979	0.921065	0.655136	0.406934	1.41643	1.2377	0.4884
lpg0171	1	18	18	30	12	11	13	101	187	91	61	96	71	26	12	40	72	161	45	62		19	31	13	12	14	102	188	92	62	97	72	27	13	41	73	162	46	63		17.4344	11.7638	11.0497	11.0528	9.17191	41.5073	53.2578	56.9342	30.2808
lpg0171, lpg0246, lpg2806	3	1	0	0	0	0	0	0	0	0	0	1	0	0	0	0	0	0	0	0		1	1	1	1	1	1	1	1	1	2	1	1	1	1	1	1	1	1		0.9176	0.379478	0.849979	0.921065	0.655136	0.406934	0.283286	0.61885	0.4884
lpg0171, lpg0404	2	9	0	0	0	0	0	17	6	4	28	4	0	0	0	0	5	15	11	6		1	1	1	1	1	18	7	5	29	5	1	1	1	1	6	16	12	7		0.9176	0.379478	0.849979	0.921065	0.655136	7.32481	1.983	3.09425	14.1636
lpg0171, lpg0404, lpg1701, lpg2584, lpg2884, lpg2885	6	1	0	0	0	0	0	0	0	0	1	0	0	0	0	0	0	0	0	0		1	1	1	1	1	1	1	1	2	1	1	1	1	1	1	1	1	1		0.9176	0.379478	0.849979	0.921065	0.655136	0.406934	0.283286	0.61885	0.976801
lpg0171, lpg0404, lpg2552	3	10	0	0	0	0	0	225	31	15	138	29	0	0	1	0	105	85	91	59		1	1	1	1	1	226	32	16	139	30	1	1	2	1	106	86	92	60		0.9176	0.379478	0.849979	0.921065	0.655136	91.9671	9.06516	9.9016	67.8877
lpg0171, lpg0518	2	9	0	0	0	0	0	5	10	4	4	1	0	0	0	0	2	10	4	4		1	1	1	1	1	6	11	5	5	2	1	1	1	1	3	11	5	5		0.9176	0.379478	0.849979	0.921065	0.655136	2.4416	3.11615	3.09425	2.442
lpg0171, lpg0518, lpg0716, lpg1137, lpg1661, lpg2271, lpg2884, lpg2888	8	1	0	0	0	0	0	0	0	0	0	0	0	0	0	0	0	1	0	0		1	1	1	1	1	1	1	1	1	1	1	1	1	1	1	2	1	1		0.9176	0.379478	0.849979	0.921065	0.655136	0.406934	0.283286	0.61885	0.4884
lpg0171, lpg0518, lpg1099, lpg1137, lpg1525, lpg2584	6	1	0	0	0	0	0	0	0	1	0	0	0	0	0	0	0	0	0	0		1	1	1	1	1	1	1	2	1	1	1	1	1	1	1	1	1	1		0.9176	0.379478	0.849979	0.921065	0.655136	0.406934	0.283286	1.2377	0.4884
lpg0171, lpg0518, lpg1137	3	9	0	0	0	0	0	24	48	21	19	48	0	0	0	0	14	35	14	21		1	1	1	1	1	25	49	22	20	49	1	1	1	1	15	36	15	22		0.9176	0.379478	0.849979	0.921065	0.655136	10.1734	13.881	13.6147	9.76801
lpg0171, lpg0518, lpg1137, lpg1525, lpg1621, lpg1959	6	1	0	0	0	0	0	0	1	0	0	0	0	0	0	0	0	0	0	0		1	1	1	1	1	1	2	1	1	1	1	1	1	1	1	1	1	1		0.9176	0.379478	0.849979	0.921065	0.655136	0.406934	0.566572	0.61885	0.4884
lpg0171, lpg0518, lpg1137, lpg1621, lpg1701, lpg2884	6	1	0	0	0	0	0	1	0	0	0	0	0	0	0	0	0	0	0	0		1	1	1	1	1	2	1	1	1	1	1	1	1	1	1	1	1	1		0.9176	0.379478	0.849979	0.921065	0.655136	0.813868	0.283286	0.61885	0.4884
lpg0171, lpg0518, lpg1137, lpg2692, lpg2884	5	2	0	0	0	0	0	0	0	0	1	1	0	0	0	0	0	0	0	0		1	1	1	1	1	1	1	1	2	2	1	1	1	1	1	1	1	1		0.9176	0.379478	0.849979	0.921065	0.655136	0.406934	0.283286	0.61885	0.976801
lpg0171, lpg0518, lpg1137, lpg2884	4	9	0	0	0	0	0	153	323	137	182	234	0	0	0	0	139	306	88	145		1	1	1	1	1	154	324	138	183	235	1	1	1	1	140	307	89	146		0.9176	0.379478	0.849979	0.921065	0.655136	62.6679	91.7847	85.4013	89.3773
lpg0171, lpg0518, lpg1661, lpg2584, lpg2884, lpg2885	6	1	0	0	0	0	0	0	0	0	0	0	0	0	0	0	0	0	0	1		1	1	1	1	1	1	1	1	1	1	1	1	1	1	1	1	1	2		0.9176	0.379478	0.849979	0.921065	0.655136	0.406934	0.283286	0.61885	0.4884
lpg0171, lpg0518, lpg2884	3	9	0	0	0	0	0	16	31	11	12	23	0	0	0	0	16	21	5	16		1	1	1	1	1	17	32	12	13	24	1	1	1	1	17	22	6	17		0.9176	0.379478	0.849979	0.921065	0.655136	6.91788	9.06516	7.4262	6.34921
lpg0171, lpg0621	2	1	0	1	0	0	0	0	0	0	0	0	0	0	0	0	0	0	0	0		1	2	1	1	1	1	1	1	1	1	1	1	1	1	1	1	1	1		0.9176	0.758956	0.849979	0.921065	0.655136	0.406934	0.283286	0.61885	0.4884
lpg0171, lpg0621, lpg1661	3	3	0	2	0	0	0	0	0	0	0	0	2	0	0	1	0	0	0	0		1	3	1	1	1	1	1	1	1	1	3	1	1	2	1	1	1	1		0.9176	1.13843	0.849979	0.921065	0.655136	0.406934	0.283286	0.61885	0.4884
lpg0171, lpg0716, lpg2885	3	2	0	1	0	0	0	0	0	0	0	0	0	1	0	0	0	0	0	0		1	2	1	1	1	1	1	1	1	1	1	2	1	1	1	1	1	1		0.9176	0.758956	0.849979	0.921065	0.655136	0.406934	0.283286	0.61885	0.4884
lpg0171, lpg0963, lpg1099, lpg1137, lpg2223, lpg2885	6	1	0	0	0	0	0	0	0	0	0	0	0	0	0	1	0	0	0	0		1	1	1	1	1	1	1	1	1	1	1	1	1	2	1	1	1	1		0.9176	0.379478	0.849979	0.921065	0.655136	0.406934	0.283286	0.61885	0.4884
lpg0171, lpg0963, lpg1137, lpg2223	4	7	2	3	0	2	0	0	0	0	0	0	1	1	1	4	0	0	0	0		3	4	1	3	1	1	1	1	1	1	2	2	2	5	1	1	1	1		2.7528	1.51791	0.849979	2.76319	0.655136	0.406934	0.283286	0.61885	0.4884
lpg0171, lpg0963, lpg1137, lpg2223, lpg2885	5	9	3	7	4	8	6	0	0	0	0	0	6	11	20	72	0	0	0	0		4	8	5	9	7	1	1	1	1	1	7	12	21	73	1	1	1	1		3.6704	3.03582	4.24989	8.28958	4.58595	0.406934	0.283286	0.61885	0.4884
lpg0171, lpg0963, lpg2223	3	2	0	0	0	0	0	0	0	0	0	0	0	1	0	1	0	0	0	0		1	1	1	1	1	1	1	1	1	1	1	2	1	2	1	1	1	1		0.9176	0.379478	0.849979	0.921065	0.655136	0.406934	0.283286	0.61885	0.4884
lpg0171, lpg0963, lpg2223, lpg2885	4	7	0	1	0	1	1	0	0	0	0	0	1	2	2	3	0	0	0	0		1	2	1	2	2	1	1	1	1	1	2	3	3	4	1	1	1	1		0.9176	0.758956	0.849979	1.84213	1.31027	0.406934	0.283286	0.61885	0.4884
lpg0171, lpg1099	2	8	0	0	0	0	0	4	15	4	5	8	0	0	0	0	0	7	3	2		1	1	1	1	1	5	16	5	6	9	1	1	1	1	1	8	4	3		0.9176	0.379478	0.849979	0.921065	0.655136	2.03467	4.53258	3.09425	2.9304
lpg0171, lpg1099, lpg2244	3	9	0	0	0	0	0	34	115	40	34	69	0	0	0	0	22	58	18	21		1	1	1	1	1	35	116	41	35	70	1	1	1	1	23	59	19	22		0.9176	0.379478	0.849979	0.921065	0.655136	14.2427	32.8612	25.3729	17.094
lpg0171, lpg1137	2	18	110	45	17	63	20	7	7	2	5	9	56	35	29	137	4	13	3	4		111	46	18	64	21	8	8	3	6	10	57	36	30	138	5	14	4	5		101.854	17.456	15.2996	58.9481	13.7579	3.25547	2.26629	1.85655	2.9304
lpg0171, lpg1137, lpg1527	3	5	0	0	0	0	0	4	0	0	1	0	0	0	0	0	3	5	0	1		1	1	1	1	1	5	1	1	2	1	1	1	1	1	4	6	1	2		0.9176	0.379478	0.849979	0.921065	0.655136	2.03467	0.283286	0.61885	0.976801
lpg0171, lpg1137, lpg1527, lpg2733	4	6	0	0	0	0	0	8	0	0	3	0	0	0	0	0	2	6	3	3		1	1	1	1	1	9	1	1	4	1	1	1	1	1	3	7	4	4		0.9176	0.379478	0.849979	0.921065	0.655136	3.66241	0.283286	0.61885	1.9536
lpg0171, lpg1137, lpg1527, lpg2733, lpg2815	5	7	0	0	0	0	0	29	0	0	27	0	0	0	2	0	22	45	14	28		1	1	1	1	1	30	1	1	28	1	1	1	3	1	23	46	15	29		0.9176	0.379478	0.849979	0.921065	0.655136	12.208	0.283286	0.61885	13.6752
lpg0171, lpg1137, lpg1527, lpg2815	4	6	0	0	0	0	0	12	0	0	13	0	0	0	0	0	6	13	4	6		1	1	1	1	1	13	1	1	14	1	1	1	1	1	7	14	5	7		0.9176	0.379478	0.849979	0.921065	0.655136	5.29014	0.283286	0.61885	6.83761
lpg0171, lpg1137, lpg1621	3	5	0	0	0	0	0	0	2	1	0	1	0	0	0	0	1	3	0	0		1	1	1	1	1	1	3	2	1	2	1	1	1	1	2	4	1	1		0.9176	0.379478	0.849979	0.921065	0.655136	0.406934	0.849858	1.2377	0.4884
lpg0171, lpg1137, lpg1621, lpg1907	4	9	0	0	0	0	0	9	24	15	5	30	0	0	0	0	7	19	2	11		1	1	1	1	1	10	25	16	6	31	1	1	1	1	8	20	3	12		0.9176	0.379478	0.849979	0.921065	0.655136	4.06934	7.08215	9.9016	2.9304
lpg0171, lpg1137, lpg1689, lpg2692	4	2	0	0	0	0	0	0	0	0	0	0	0	0	0	1	0	0	1	0		1	1	1	1	1	1	1	1	1	1	1	1	1	2	1	1	2	1		0.9176	0.379478	0.849979	0.921065	0.655136	0.406934	0.283286	0.61885	0.4884
lpg0171, lpg1137, lpg1689, lpg2804, lpg2815	5	1	0	0	0	0	0	0	0	0	0	0	0	0	0	1	0	0	0	0		1	1	1	1	1	1	1	1	1	1	1	1	1	2	1	1	1	1		0.9176	0.379478	0.849979	0.921065	0.655136	0.406934	0.283286	0.61885	0.4884
lpg0171, lpg1137, lpg1907	3	5	0	0	0	0	0	0	1	4	2	5	0	0	0	0	0	1	0	0		1	1	1	1	1	1	2	5	3	6	1	1	1	1	1	2	1	1		0.9176	0.379478	0.849979	0.921065	0.655136	0.406934	0.566572	3.09425	1.4652
lpg0171, lpg1137, lpg2223	3	3	1	0	0	0	0	0	0	0	0	0	0	1	1	0	0	0	0	0		2	1	1	1	1	1	1	1	1	1	1	2	2	1	1	1	1	1		1.8352	0.379478	0.849979	0.921065	0.655136	0.406934	0.283286	0.61885	0.4884
lpg0171, lpg1137, lpg2223, lpg2885	4	7	0	0	1	2	2	0	0	0	0	0	2	1	1	13	0	0	0	0		1	1	2	3	3	1	1	1	1	1	3	2	2	14	1	1	1	1		0.9176	0.379478	1.69996	2.76319	1.96541	0.406934	0.283286	0.61885	0.4884
lpg0171, lpg1137, lpg2733	3	2	0	0	0	0	0	1	0	0	0	0	0	0	0	0	0	1	0	0		1	1	1	1	1	2	1	1	1	1	1	1	1	1	1	2	1	1		0.9176	0.379478	0.849979	0.921065	0.655136	0.813868	0.283286	0.61885	0.4884
lpg0171, lpg1137, lpg2733, lpg2815	4	3	0	0	0	0	0	2	0	0	0	0	0	0	0	0	0	2	0	2		1	1	1	1	1	3	1	1	1	1	1	1	1	1	1	3	1	3		0.9176	0.379478	0.849979	0.921065	0.655136	1.2208	0.283286	0.61885	0.4884
lpg0171, lpg1137, lpg2815	3	4	0	0	0	0	0	1	0	0	0	0	0	0	0	0	1	1	1	0		1	1	1	1	1	2	1	1	1	1	1	1	1	1	2	2	2	1		0.9176	0.379478	0.849979	0.921065	0.655136	0.813868	0.283286	0.61885	0.4884
lpg0171, lpg1137, lpg2884	3	9	0	0	0	0	0	11	31	13	11	19	0	0	0	0	8	21	8	8		1	1	1	1	1	12	32	14	12	20	1	1	1	1	9	22	9	9		0.9176	0.379478	0.849979	0.921065	0.655136	4.88321	9.06516	8.6639	5.86081
lpg0171, lpg1137, lpg3000	3	1	0	0	0	0	0	0	0	0	0	0	0	0	0	0	0	0	1	0		1	1	1	1	1	1	1	1	1	1	1	1	1	1	1	1	2	1		0.9176	0.379478	0.849979	0.921065	0.655136	0.406934	0.283286	0.61885	0.4884
lpg0171, lpg1525, lpg1621, lpg1701, lpg2271	5	2	0	0	0	0	0	0	1	0	1	0	0	0	0	0	0	0	0	0		1	1	1	1	1	1	2	1	2	1	1	1	1	1	1	1	1	1		0.9176	0.379478	0.849979	0.921065	0.655136	0.406934	0.566572	0.61885	0.976801
lpg0171, lpg1525, lpg1701, lpg2271	4	3	0	0	0	0	0	1	1	1	0	0	0	0	0	0	0	0	0	0		1	1	1	1	1	2	2	2	1	1	1	1	1	1	1	1	1	1		0.9176	0.379478	0.849979	0.921065	0.655136	0.813868	0.566572	1.2377	0.4884
lpg0171, lpg1525, lpg2223, lpg2584, lpg2692, lpg3000	6	1	0	0	0	0	0	0	0	0	0	0	0	0	0	0	0	1	0	0		1	1	1	1	1	1	1	1	1	1	1	1	1	1	1	2	1	1		0.9176	0.379478	0.849979	0.921065	0.655136	0.406934	0.283286	0.61885	0.4884
lpg0171, lpg1525, lpg2271	3	1	0	0	0	0	0	0	2	0	0	0	0	0	0	0	0	0	0	0		1	1	1	1	1	1	3	1	1	1	1	1	1	1	1	1	1	1		0.9176	0.379478	0.849979	0.921065	0.655136	0.406934	0.849858	0.61885	0.4884
lpg0171, lpg1527	2	2	0	0	0	0	0	0	0	0	0	0	0	0	0	0	0	1	1	0		1	1	1	1	1	1	1	1	1	1	1	1	1	1	1	2	2	1		0.9176	0.379478	0.849979	0.921065	0.655136	0.406934	0.283286	0.61885	0.4884
lpg0171, lpg1527, lpg2733	3	1	0	0	0	0	0	0	0	0	0	0	0	0	0	0	0	1	0	0		1	1	1	1	1	1	1	1	1	1	1	1	1	1	1	2	1	1		0.9176	0.379478	0.849979	0.921065	0.655136	0.406934	0.283286	0.61885	0.4884
lpg0171, lpg1527, lpg2733, lpg2815	4	6	0	0	0	0	0	2	0	0	2	0	0	0	0	0	3	4	5	3		1	1	1	1	1	3	1	1	3	1	1	1	1	1	4	5	6	4		0.9176	0.379478	0.849979	0.921065	0.655136	1.2208	0.283286	0.61885	1.4652
lpg0171, lpg1527, lpg2733, lpg3000	4	1	0	0	0	0	0	0	0	0	0	0	0	0	0	0	0	1	0	0		1	1	1	1	1	1	1	1	1	1	1	1	1	1	1	2	1	1		0.9176	0.379478	0.849979	0.921065	0.655136	0.406934	0.283286	0.61885	0.4884
lpg0171, lpg1527, lpg2815	3	5	0	0	0	0	0	2	0	0	0	0	0	0	0	0	1	2	2	2		1	1	1	1	1	3	1	1	1	1	1	1	1	1	2	3	3	3		0.9176	0.379478	0.849979	0.921065	0.655136	1.2208	0.283286	0.61885	0.4884
lpg0171, lpg1621	2	9	0	0	0	0	0	14	22	5	3	8	0	0	0	0	3	4	4	7		1	1	1	1	1	15	23	6	4	9	1	1	1	1	4	5	5	8		0.9176	0.379478	0.849979	0.921065	0.655136	6.10401	6.51558	3.7131	1.9536
lpg0171, lpg1621, lpg1701, lpg2271	4	4	0	0	0	0	0	1	1	1	0	0	0	0	0	0	0	0	1	0		1	1	1	1	1	2	2	2	1	1	1	1	1	1	1	1	2	1		0.9176	0.379478	0.849979	0.921065	0.655136	0.813868	0.566572	1.2377	0.4884
lpg0171, lpg1621, lpg1907	3	4	0	0	0	0	0	0	0	1	0	3	0	0	0	0	0	4	0	1		1	1	1	1	1	1	1	2	1	4	1	1	1	1	1	5	1	2		0.9176	0.379478	0.849979	0.921065	0.655136	0.406934	0.283286	1.2377	0.4884
lpg0171, lpg1661	2	3	0	1	0	0	0	0	2	0	0	0	0	0	0	1	0	0	0	0		1	2	1	1	1	1	3	1	1	1	1	1	1	2	1	1	1	1		0.9176	0.758956	0.849979	0.921065	0.655136	0.406934	0.849858	0.61885	0.4884
lpg0171, lpg1661, lpg2733	3	7	0	0	0	0	0	1	2	3	0	4	0	0	0	0	0	1	1	2		1	1	1	1	1	2	3	4	1	5	1	1	1	1	1	2	2	3		0.9176	0.379478	0.849979	0.921065	0.655136	0.813868	0.849858	2.4754	0.4884
lpg0171, lpg1689	2	7	0	0	0	0	0	1	5	5	0	2	0	0	0	0	0	5	1	1		1	1	1	1	1	2	6	6	1	3	1	1	1	1	1	6	2	2		0.9176	0.379478	0.849979	0.921065	0.655136	0.813868	1.69972	3.7131	0.4884
lpg0171, lpg1689, lpg1776	3	9	0	0	0	0	0	3	12	6	6	11	0	0	0	0	4	7	4	3		1	1	1	1	1	4	13	7	7	12	1	1	1	1	5	8	5	4		0.9176	0.379478	0.849979	0.921065	0.655136	1.62774	3.68272	4.33195	3.4188
lpg0171, lpg1701	2	6	0	0	0	0	0	1	4	0	3	0	0	0	0	0	1	2	1	0		1	1	1	1	1	2	5	1	4	1	1	1	1	1	2	3	2	1		0.9176	0.379478	0.849979	0.921065	0.655136	0.813868	1.41643	0.61885	1.9536
lpg0171, lpg1701, lpg1907, lpg2628	4	1	0	0	0	0	0	0	1	0	0	0	0	0	0	0	0	0	0	0		1	1	1	1	1	1	2	1	1	1	1	1	1	1	1	1	1	1		0.9176	0.379478	0.849979	0.921065	0.655136	0.406934	0.566572	0.61885	0.4884
lpg0171, lpg1701, lpg2223, lpg2244, lpg2884	5	1	0	0	0	0	0	0	1	0	0	0	0	0	0	0	0	0	0	0		1	1	1	1	1	1	2	1	1	1	1	1	1	1	1	1	1	1		0.9176	0.379478	0.849979	0.921065	0.655136	0.406934	0.566572	0.61885	0.4884
lpg0171, lpg1701, lpg2244, lpg2815, lpg2884	5	1	0	0	0	0	0	0	0	0	0	0	0	0	0	0	0	0	1	0		1	1	1	1	1	1	1	1	1	1	1	1	1	1	1	1	2	1		0.9176	0.379478	0.849979	0.921065	0.655136	0.406934	0.283286	0.61885	0.4884
lpg0171, lpg1701, lpg2884	3	9	0	0	0	0	0	34	45	14	54	37	0	0	0	0	19	23	24	29		1	1	1	1	1	35	46	15	55	38	1	1	1	1	20	24	25	30		0.9176	0.379478	0.849979	0.921065	0.655136	14.2427	13.0312	9.28275	26.862
lpg0171, lpg1702	2	2	0	0	0	0	0	0	0	0	1	0	0	0	0	0	0	0	0	1		1	1	1	1	1	1	1	1	2	1	1	1	1	1	1	1	1	2		0.9176	0.379478	0.849979	0.921065	0.655136	0.406934	0.283286	0.61885	0.976801
lpg0171, lpg1702, lpg2815	3	1	0	0	0	0	0	0	0	0	0	0	0	0	0	0	0	0	0	1		1	1	1	1	1	1	1	1	1	1	1	1	1	1	1	1	1	2		0.9176	0.379478	0.849979	0.921065	0.655136	0.406934	0.283286	0.61885	0.4884
lpg0171, lpg1776	2	6	0	0	0	0	0	6	2	1	1	3	0	0	0	0	0	3	0	0		1	1	1	1	1	7	3	2	2	4	1	1	1	1	1	4	1	1		0.9176	0.379478	0.849979	0.921065	0.655136	2.84854	0.849858	1.2377	0.976801
lpg0171, lpg1776, lpg2884	3	2	0	0	0	0	0	0	0	0	0	0	0	0	1	1	0	0	0	0		1	1	1	1	1	1	1	1	1	1	1	1	2	2	1	1	1	1		0.9176	0.379478	0.849979	0.921065	0.655136	0.406934	0.283286	0.61885	0.4884
lpg0171, lpg1776, lpg2884, lpg2885	4	5	1	1	0	0	0	0	0	0	0	0	1	1	0	3	0	0	0	0		2	2	1	1	1	1	1	1	1	1	2	2	1	4	1	1	1	1		1.8352	0.758956	0.849979	0.921065	0.655136	0.406934	0.283286	0.61885	0.4884
lpg0171, lpg1776, lpg2885	3	1	0	0	0	0	0	0	0	0	0	0	0	0	0	1	0	0	0	0		1	1	1	1	1	1	1	1	1	1	1	1	1	2	1	1	1	1		0.9176	0.379478	0.849979	0.921065	0.655136	0.406934	0.283286	0.61885	0.4884
lpg0171, lpg1907	2	5	0	0	0	0	0	2	0	2	0	1	0	0	0	0	0	0	1	1		1	1	1	1	1	3	1	3	1	2	1	1	1	1	1	1	2	2		0.9176	0.379478	0.849979	0.921065	0.655136	1.2208	0.283286	1.85655	0.4884
lpg0171, lpg1907, lpg2733, lpg3000	4	3	0	0	0	0	0	0	2	0	0	1	0	0	0	0	0	0	0	1		1	1	1	1	1	1	3	1	1	2	1	1	1	1	1	1	1	2		0.9176	0.379478	0.849979	0.921065	0.655136	0.406934	0.849858	0.61885	0.4884
lpg0171, lpg1907, lpg2885	3	5	0	0	0	0	0	2	0	1	0	0	0	0	0	0	1	2	0	1		1	1	1	1	1	3	1	2	1	1	1	1	1	1	2	3	1	2		0.9176	0.379478	0.849979	0.921065	0.655136	1.2208	0.283286	1.2377	0.4884
lpg0171, lpg1907, lpg3000	3	1	0	0	0	0	0	0	0	0	0	1	0	0	0	0	0	0	0	0		1	1	1	1	1	1	1	1	1	2	1	1	1	1	1	1	1	1		0.9176	0.379478	0.849979	0.921065	0.655136	0.406934	0.283286	0.61885	0.4884
lpg0171, lpg2223	2	2	0	0	0	0	0	0	0	0	0	0	0	1	0	1	0	0	0	0		1	1	1	1	1	1	1	1	1	1	1	2	1	2	1	1	1	1		0.9176	0.379478	0.849979	0.921065	0.655136	0.406934	0.283286	0.61885	0.4884
lpg0171, lpg2223, lpg2885	3	2	0	0	0	0	0	0	0	0	0	0	0	0	1	3	0	0	0	0		1	1	1	1	1	1	1	1	1	1	1	1	2	4	1	1	1	1		0.9176	0.379478	0.849979	0.921065	0.655136	0.406934	0.283286	0.61885	0.4884
lpg0171, lpg2244	2	9	0	0	0	0	0	7	20	6	4	12	0	0	0	0	5	6	3	9		1	1	1	1	1	8	21	7	5	13	1	1	1	1	6	7	4	10		0.9176	0.379478	0.849979	0.921065	0.655136	3.25547	5.94901	4.33195	2.442
lpg0171, lpg2271	2	9	0	0	0	0	0	15	12	2	7	6	0	0	0	0	7	12	6	6		1	1	1	1	1	16	13	3	8	7	1	1	1	1	8	13	7	7		0.9176	0.379478	0.849979	0.921065	0.655136	6.51095	3.68272	1.85655	3.9072
lpg0171, lpg2552	2	8	0	0	0	0	0	14	4	3	10	0	0	0	0	0	4	6	3	4		1	1	1	1	1	15	5	4	11	1	1	1	1	1	5	7	4	5		0.9176	0.379478	0.849979	0.921065	0.655136	6.10401	1.41643	2.4754	5.37241
lpg0171, lpg2584	2	7	0	1	0	0	0	0	0	93	90	0	0	1	2	0	0	99	0	74		1	2	1	1	1	1	1	94	91	1	1	2	3	1	1	100	1	75		0.9176	0.758956	0.849979	0.921065	0.655136	0.406934	0.283286	58.1719	44.4444
lpg0171, lpg2628	2	2	0	0	0	0	0	0	1	0	0	2	0	0	0	0	0	0	0	0		1	1	1	1	1	1	2	1	1	3	1	1	1	1	1	1	1	1		0.9176	0.379478	0.849979	0.921065	0.655136	0.406934	0.566572	0.61885	0.4884
lpg0171, lpg2628, lpg2733	3	2	0	0	0	0	0	0	2	0	0	1	0	0	0	0	0	0	0	0		1	1	1	1	1	1	3	1	1	2	1	1	1	1	1	1	1	1		0.9176	0.379478	0.849979	0.921065	0.655136	0.406934	0.849858	0.61885	0.4884
lpg0171, lpg2628, lpg2733, lpg2884	4	4	0	0	0	0	0	0	3	0	1	1	0	0	0	0	1	0	0	0		1	1	1	1	1	1	4	1	2	2	1	1	1	1	2	1	1	1		0.9176	0.379478	0.849979	0.921065	0.655136	0.406934	1.13314	0.61885	0.976801
lpg0171, lpg2628, lpg2733, lpg2884, lpg3000	5	8	0	0	0	0	0	1	8	2	0	3	0	0	0	0	1	4	9	2		1	1	1	1	1	2	9	3	1	4	1	1	1	1	2	5	10	3		0.9176	0.379478	0.849979	0.921065	0.655136	0.813868	2.54958	1.85655	0.4884
lpg0171, lpg2628, lpg2733, lpg3000	4	5	0	0	0	0	0	0	1	1	0	1	0	0	0	0	0	0	1	1		1	1	1	1	1	1	2	2	1	2	1	1	1	1	1	1	2	2		0.9176	0.379478	0.849979	0.921065	0.655136	0.406934	0.566572	1.2377	0.4884
lpg0171, lpg2628, lpg2884	3	2	0	0	0	0	0	0	2	0	0	0	0	0	0	0	0	0	1	0		1	1	1	1	1	1	3	1	1	1	1	1	1	1	1	1	2	1		0.9176	0.379478	0.849979	0.921065	0.655136	0.406934	0.849858	0.61885	0.4884
lpg0171, lpg2628, lpg2884, lpg3000	4	5	0	0	0	0	0	0	3	2	3	1	0	0	0	0	0	2	0	0		1	1	1	1	1	1	4	3	4	2	1	1	1	1	1	3	1	1		0.9176	0.379478	0.849979	0.921065	0.655136	0.406934	1.13314	1.85655	1.9536
lpg0171, lpg2628, lpg3000	3	2	0	0	0	0	0	0	1	0	0	0	0	0	0	0	0	1	0	0		1	1	1	1	1	1	2	1	1	1	1	1	1	1	1	2	1	1		0.9176	0.379478	0.849979	0.921065	0.655136	0.406934	0.566572	0.61885	0.4884
lpg0171, lpg2733	2	10	0	0	0	0	0	20	29	21	6	15	0	0	1	0	12	14	7	15		1	1	1	1	1	21	30	22	7	16	1	1	2	1	13	15	8	16		0.9176	0.379478	0.849979	0.921065	0.655136	8.54562	8.49858	13.6147	3.4188
lpg0171, lpg2733, lpg2884	3	2	0	0	0	0	0	0	0	0	0	1	0	0	0	0	0	0	1	0		1	1	1	1	1	1	1	1	1	2	1	1	1	1	1	1	2	1		0.9176	0.379478	0.849979	0.921065	0.655136	0.406934	0.283286	0.61885	0.4884
lpg0171, lpg2733, lpg2884, lpg3000	4	5	0	0	0	0	0	1	2	0	0	0	0	0	0	0	2	0	1	1		1	1	1	1	1	2	3	1	1	1	1	1	1	1	3	1	2	2		0.9176	0.379478	0.849979	0.921065	0.655136	0.813868	0.849858	0.61885	0.4884
lpg0171, lpg2733, lpg3000	3	2	0	0	0	0	0	0	2	0	0	0	0	0	0	0	2	0	0	0		1	1	1	1	1	1	3	1	1	1	1	1	1	1	3	1	1	1		0.9176	0.379478	0.849979	0.921065	0.655136	0.406934	0.849858	0.61885	0.4884
lpg0171, lpg2815	2	1	0	0	0	0	0	0	0	0	0	0	0	0	0	0	0	1	0	0		1	1	1	1	1	1	1	1	1	1	1	1	1	1	1	2	1	1		0.9176	0.379478	0.849979	0.921065	0.655136	0.406934	0.283286	0.61885	0.4884
lpg0171, lpg2884	2	9	0	0	0	0	0	4	8	9	3	9	0	0	0	0	5	7	3	8		1	1	1	1	1	5	9	10	4	10	1	1	1	1	6	8	4	9		0.9176	0.379478	0.849979	0.921065	0.655136	2.03467	2.54958	6.1885	1.9536
lpg0171, lpg2884, lpg2885	3	2	0	0	0	1	0	0	0	0	0	0	0	0	0	1	0	0	0	0		1	1	1	2	1	1	1	1	1	1	1	1	1	2	1	1	1	1		0.9176	0.379478	0.849979	1.84213	0.655136	0.406934	0.283286	0.61885	0.4884
lpg0171, lpg2884, lpg3000	3	2	0	0	0	0	0	1	0	0	0	1	0	0	0	0	0	0	0	0		1	1	1	1	1	2	1	1	1	2	1	1	1	1	1	1	1	1		0.9176	0.379478	0.849979	0.921065	0.655136	0.813868	0.283286	0.61885	0.4884
lpg0171, lpg2885	2	4	0	0	1	0	0	0	0	0	0	0	1	0	1	1	0	0	0	0		1	1	2	1	1	1	1	1	1	1	2	1	2	2	1	1	1	1		0.9176	0.379478	1.69996	0.921065	0.655136	0.406934	0.283286	0.61885	0.4884
lpg0171, lpg3000	2	1	0	0	0	0	0	0	0	0	0	0	0	0	0	0	0	0	1	0		1	1	1	1	1	1	1	1	1	1	1	1	1	1	1	1	2	1		0.9176	0.379478	0.849979	0.921065	0.655136	0.406934	0.283286	0.61885	0.4884
lpg0246	1	18	19	43	17	14	5	48	43	17	39	52	49	25	18	28	32	57	27	32		20	44	18	15	6	49	44	18	40	53	50	26	19	29	33	58	28	33		18.352	16.697	15.2996	13.816	3.93082	19.9398	12.4646	11.1393	19.536
lpg0246, lpg0404	2	5	1	0	0	0	0	1	0	0	1	1	1	0	0	0	0	0	0	0		2	1	1	1	1	2	1	1	2	2	2	1	1	1	1	1	1	1		1.8352	0.379478	0.849979	0.921065	0.655136	0.813868	0.283286	0.61885	0.976801
lpg0246, lpg0404, lpg0439	3	4	0	0	0	0	0	0	0	1	0	0	0	0	0	0	3	0	2	1		1	1	1	1	1	1	1	2	1	1	1	1	1	1	4	1	3	2		0.9176	0.379478	0.849979	0.921065	0.655136	0.406934	0.283286	1.2377	0.4884
lpg0246, lpg0404, lpg0439, lpg1525	4	7	0	0	0	0	0	2	1	0	1	1	0	0	0	0	1	0	1	2		1	1	1	1	1	3	2	1	2	2	1	1	1	1	2	1	2	3		0.9176	0.379478	0.849979	0.921065	0.655136	1.2208	0.566572	0.61885	0.976801
lpg0246, lpg0404, lpg0439, lpg1525, lpg1701	5	9	0	0	0	0	0	20	6	2	14	3	0	0	0	0	13	9	10	3		1	1	1	1	1	21	7	3	15	4	1	1	1	1	14	10	11	4		0.9176	0.379478	0.849979	0.921065	0.655136	8.54562	1.983	1.85655	7.32601
lpg0246, lpg0404, lpg0439, lpg1525, lpg1701, lpg2692	6	9	0	0	0	0	0	108	31	11	90	29	0	0	0	0	73	71	38	33		1	1	1	1	1	109	32	12	91	30	1	1	1	1	74	72	39	34		0.9176	0.379478	0.849979	0.921065	0.655136	44.3558	9.06516	7.4262	44.4444
lpg0246, lpg0404, lpg0439, lpg1525, lpg2692	5	8	0	0	0	0	0	7	2	0	5	1	0	0	0	0	1	4	1	1		1	1	1	1	1	8	3	1	6	2	1	1	1	1	2	5	2	2		0.9176	0.379478	0.849979	0.921065	0.655136	3.25547	0.849858	0.61885	2.9304
lpg0246, lpg0404, lpg0439, lpg1701	4	7	0	0	0	0	0	4	4	1	4	0	0	0	0	0	2	3	0	1		1	1	1	1	1	5	5	2	5	1	1	1	1	1	3	4	1	2		0.9176	0.379478	0.849979	0.921065	0.655136	2.03467	1.41643	1.2377	2.442
lpg0246, lpg0404, lpg0439, lpg1701, lpg2692	5	8	0	0	0	0	0	32	8	4	20	8	0	0	0	0	24	10	8	0		1	1	1	1	1	33	9	5	21	9	1	1	1	1	25	11	9	1		0.9176	0.379478	0.849979	0.921065	0.655136	13.4288	2.54958	3.09425	10.2564
lpg0246, lpg0404, lpg0439, lpg2692	4	8	0	0	0	0	0	4	1	1	2	0	0	0	0	0	4	4	2	1		1	1	1	1	1	5	2	2	3	1	1	1	1	1	5	5	3	2		0.9176	0.379478	0.849979	0.921065	0.655136	2.03467	0.566572	1.2377	1.4652
lpg0246, lpg0404, lpg1525	3	3	0	0	0	0	0	0	0	0	1	0	0	0	0	0	1	1	0	0		1	1	1	1	1	1	1	1	2	1	1	1	1	1	2	2	1	1		0.9176	0.379478	0.849979	0.921065	0.655136	0.406934	0.283286	0.61885	0.976801
lpg0246, lpg0404, lpg1525, lpg1701	4	9	0	0	0	0	0	6	1	1	4	2	0	0	0	0	5	3	1	1		1	1	1	1	1	7	2	2	5	3	1	1	1	1	6	4	2	2		0.9176	0.379478	0.849979	0.921065	0.655136	2.84854	0.566572	1.2377	2.442
lpg0246, lpg0404, lpg1525, lpg1701, lpg2692	5	9	0	0	0	0	0	16	3	1	6	4	0	0	0	0	7	13	6	5		1	1	1	1	1	17	4	2	7	5	1	1	1	1	8	14	7	6		0.9176	0.379478	0.849979	0.921065	0.655136	6.91788	1.13314	1.2377	3.4188
lpg0246, lpg0404, lpg1525, lpg2692	4	6	0	0	0	0	0	1	0	2	1	2	0	0	0	0	1	0	0	1		1	1	1	1	1	2	1	3	2	3	1	1	1	1	2	1	1	2		0.9176	0.379478	0.849979	0.921065	0.655136	0.813868	0.283286	1.85655	0.976801
lpg0246, lpg0404, lpg1621	3	4	1	0	0	1	0	0	0	0	0	0	1	0	0	1	0	0	0	0		2	1	1	2	1	1	1	1	1	1	2	1	1	2	1	1	1	1		1.8352	0.379478	0.849979	1.84213	0.655136	0.406934	0.283286	0.61885	0.4884
lpg0246, lpg0404, lpg1621, lpg2552	4	9	4	6	2	7	1	0	0	0	0	0	4	4	12	8	0	0	0	0		5	7	3	8	2	1	1	1	1	1	5	5	13	9	1	1	1	1		4.588	2.65634	2.54994	7.36852	1.31027	0.406934	0.283286	0.61885	0.4884
lpg0246, lpg0404, lpg1701	3	8	0	0	0	0	0	0	1	0	1	2	0	0	1	0	3	1	1	1		1	1	1	1	1	1	2	1	2	3	1	1	2	1	4	2	2	2		0.9176	0.379478	0.849979	0.921065	0.655136	0.406934	0.566572	0.61885	0.976801
lpg0246, lpg0404, lpg1701, lpg2692	4	7	0	0	0	0	0	5	2	0	3	0	0	0	0	0	1	2	3	1		1	1	1	1	1	6	3	1	4	1	1	1	1	1	2	3	4	2		0.9176	0.379478	0.849979	0.921065	0.655136	2.4416	0.849858	0.61885	1.9536
lpg0246, lpg0404, lpg2552	3	3	1	0	0	2	0	0	0	0	0	0	0	0	1	0	0	0	0	0		2	1	1	3	1	1	1	1	1	1	1	1	2	1	1	1	1	1		1.8352	0.379478	0.849979	2.76319	0.655136	0.406934	0.283286	0.61885	0.4884
lpg0246, lpg0404, lpg2692	3	3	0	0	0	0	0	0	0	0	0	0	0	0	0	0	1	0	1	1		1	1	1	1	1	1	1	1	1	1	1	1	1	1	2	1	2	2		0.9176	0.379478	0.849979	0.921065	0.655136	0.406934	0.283286	0.61885	0.4884
lpg0246, lpg0439	2	12	11	6	0	15	2	2	0	0	1	0	18	30	14	19	0	1	1	0		12	7	1	16	3	3	1	1	2	1	19	31	15	20	1	2	2	1		11.0112	2.65634	0.849979	14.737	1.96541	1.2208	0.283286	0.61885	0.976801
lpg0246, lpg0439, lpg0518, lpg0963, lpg1701, lpg2223	6	1	0	0	0	0	0	0	0	0	0	0	0	0	0	0	0	0	0	1		1	1	1	1	1	1	1	1	1	1	1	1	1	1	1	1	1	2		0.9176	0.379478	0.849979	0.921065	0.655136	0.406934	0.283286	0.61885	0.4884
lpg0246, lpg0439, lpg1525	3	2	0	0	0	0	0	0	0	0	1	0	0	0	0	0	1	0	0	0		1	1	1	1	1	1	1	1	2	1	1	1	1	1	2	1	1	1		0.9176	0.379478	0.849979	0.921065	0.655136	0.406934	0.283286	0.61885	0.976801
lpg0246, lpg0439, lpg1525, lpg1701	4	4	0	0	0	0	0	5	0	0	1	0	0	0	0	0	2	0	1	0		1	1	1	1	1	6	1	1	2	1	1	1	1	1	3	1	2	1		0.9176	0.379478	0.849979	0.921065	0.655136	2.4416	0.283286	0.61885	0.976801
lpg0246, lpg0439, lpg1525, lpg1701, lpg2692	5	7	0	0	0	0	0	3	2	0	1	0	0	0	0	0	3	2	1	2		1	1	1	1	1	4	3	1	2	1	1	1	1	1	4	3	2	3		0.9176	0.379478	0.849979	0.921065	0.655136	1.62774	0.849858	0.61885	0.976801
lpg0246, lpg0439, lpg1525, lpg2692	4	3	0	0	0	0	0	1	0	0	0	0	0	0	0	0	1	0	1	0		1	1	1	1	1	2	1	1	1	1	1	1	1	1	2	1	2	1		0.9176	0.379478	0.849979	0.921065	0.655136	0.813868	0.283286	0.61885	0.4884
lpg0246, lpg0439, lpg1661	3	9	20	14	6	24	1	0	0	0	0	0	55	92	41	68	0	0	0	0		21	15	7	25	2	1	1	1	1	1	56	93	42	69	1	1	1	1		19.2696	5.69217	5.94985	23.0266	1.31027	0.406934	0.283286	0.61885	0.4884
lpg0246, lpg0439, lpg1661, lpg2584, lpg2692, lpg2885	6	1	0	0	0	0	0	0	0	0	0	0	0	0	0	0	1	0	0	0		1	1	1	1	1	1	1	1	1	1	1	1	1	1	2	1	1	1		0.9176	0.379478	0.849979	0.921065	0.655136	0.406934	0.283286	0.61885	0.4884
lpg0246, lpg0439, lpg1701	3	6	0	0	0	0	0	2	0	1	1	1	0	0	0	0	2	0	1	0		1	1	1	1	1	3	1	2	2	2	1	1	1	1	3	1	2	1		0.9176	0.379478	0.849979	0.921065	0.655136	1.2208	0.283286	1.2377	0.976801
lpg0246, lpg0439, lpg1701, lpg2692	4	5	0	0	0	0	0	1	2	0	2	0	0	0	0	0	2	0	2	0		1	1	1	1	1	2	3	1	3	1	1	1	1	1	3	1	3	1		0.9176	0.379478	0.849979	0.921065	0.655136	0.813868	0.849858	0.61885	1.4652
lpg0246, lpg0439, lpg1907, lpg1959	4	2	0	0	0	0	0	0	0	0	0	0	0	2	0	1	0	0	0	0		1	1	1	1	1	1	1	1	1	1	1	3	1	2	1	1	1	1		0.9176	0.379478	0.849979	0.921065	0.655136	0.406934	0.283286	0.61885	0.4884
lpg0246, lpg0439, lpg1907, lpg1959, lpg2584	5	9	2	10	2	6	5	0	0	0	0	0	1	12	8	15	0	0	0	0		3	11	3	7	6	1	1	1	1	1	2	13	9	16	1	1	1	1		2.7528	4.17426	2.54994	6.44745	3.93082	0.406934	0.283286	0.61885	0.4884
lpg0246, lpg0439, lpg1907, lpg2584	4	3	0	1	2	2	0	0	0	0	0	0	0	0	0	0	0	0	0	0		1	2	3	3	1	1	1	1	1	1	1	1	1	1	1	1	1	1		0.9176	0.758956	2.54994	2.76319	0.655136	0.406934	0.283286	0.61885	0.4884
lpg0246, lpg0439, lpg1959, lpg2584	4	5	1	0	1	0	1	0	0	0	0	0	0	1	0	1	0	0	0	0		2	1	2	1	2	1	1	1	1	1	1	2	1	2	1	1	1	1		1.8352	0.379478	1.69996	0.921065	1.31027	0.406934	0.283286	0.61885	0.4884
lpg0246, lpg0439, lpg2552, lpg2692	4	1	0	0	0	0	0	0	0	0	0	0	0	0	1	0	0	0	0	0		1	1	1	1	1	1	1	1	1	1	1	1	2	1	1	1	1	1		0.9176	0.379478	0.849979	0.921065	0.655136	0.406934	0.283286	0.61885	0.4884
lpg0246, lpg0439, lpg2584	3	3	0	0	1	0	0	0	0	0	0	0	1	1	0	0	0	0	0	0		1	1	2	1	1	1	1	1	1	1	2	2	1	1	1	1	1	1		0.9176	0.379478	1.69996	0.921065	0.655136	0.406934	0.283286	0.61885	0.4884
lpg0246, lpg0439, lpg2692	3	2	0	0	0	0	0	0	0	0	0	0	0	0	0	0	0	1	0	1		1	1	1	1	1	1	1	1	1	1	1	1	1	1	1	2	1	2		0.9176	0.379478	0.849979	0.921065	0.655136	0.406934	0.283286	0.61885	0.4884
lpg0246, lpg0518	2	9	0	0	0	0	0	10	18	6	4	14	0	0	0	0	5	9	4	6		1	1	1	1	1	11	19	7	5	15	1	1	1	1	6	10	5	7		0.9176	0.379478	0.849979	0.921065	0.655136	4.47628	5.38244	4.33195	2.442
lpg0246, lpg0518, lpg2628	3	7	0	0	0	0	0	0	10	7	6	14	0	0	0	0	3	4	3	0		1	1	1	1	1	1	11	8	7	15	1	1	1	1	4	5	4	1		0.9176	0.379478	0.849979	0.921065	0.655136	0.406934	3.11615	4.9508	3.4188
lpg0246, lpg0518, lpg2888	3	1	0	0	0	0	0	0	0	0	0	0	0	0	1	0	0	0	0	0		1	1	1	1	1	1	1	1	1	1	1	1	2	1	1	1	1	1		0.9176	0.379478	0.849979	0.921065	0.655136	0.406934	0.283286	0.61885	0.4884
lpg0246, lpg0518, lpg2888, lpg3000	4	9	3	2	1	2	1	0	0	0	0	0	2	1	3	2	0	0	0	0		4	3	2	3	2	1	1	1	1	1	3	2	4	3	1	1	1	1		3.6704	1.13843	1.69996	2.76319	1.31027	0.406934	0.283286	0.61885	0.4884
lpg0246, lpg0518, lpg3000	3	3	0	1	1	0	0	0	0	0	0	0	0	1	0	0	0	0	0	0		1	2	2	1	1	1	1	1	1	1	1	2	1	1	1	1	1	1		0.9176	0.758956	1.69996	0.921065	0.655136	0.406934	0.283286	0.61885	0.4884
lpg0246, lpg0716, lpg0963, lpg2552, lpg2815	5	1	0	0	0	0	0	0	0	0	0	0	0	0	0	0	0	0	1	0		1	1	1	1	1	1	1	1	1	1	1	1	1	1	1	1	2	1		0.9176	0.379478	0.849979	0.921065	0.655136	0.406934	0.283286	0.61885	0.4884
lpg0246, lpg1099	2	8	0	0	0	0	0	6	6	1	1	0	0	0	0	0	1	3	2	1		1	1	1	1	1	7	7	2	2	1	1	1	1	1	2	4	3	2		0.9176	0.379478	0.849979	0.921065	0.655136	2.84854	1.983	1.2377	0.976801
lpg0246, lpg1099, lpg2874	3	9	0	0	0	0	0	33	41	22	7	15	0	0	0	0	19	36	17	6		1	1	1	1	1	34	42	23	8	16	1	1	1	1	20	37	18	7		0.9176	0.379478	0.849979	0.921065	0.655136	13.8358	11.898	14.2336	3.9072
lpg0246, lpg1525, lpg1701	3	4	0	0	0	0	0	2	0	0	1	0	0	0	0	0	2	2	0	0		1	1	1	1	1	3	1	1	2	1	1	1	1	1	3	3	1	1		0.9176	0.379478	0.849979	0.921065	0.655136	1.2208	0.283286	0.61885	0.976801
lpg0246, lpg1525, lpg1701, lpg2692	4	3	0	0	0	0	0	3	0	0	1	0	0	0	0	0	0	0	1	0		1	1	1	1	1	4	1	1	2	1	1	1	1	1	1	1	2	1		0.9176	0.379478	0.849979	0.921065	0.655136	1.62774	0.283286	0.61885	0.976801
lpg0246, lpg1525, lpg2692	3	1	0	0	0	0	0	0	0	0	1	0	0	0	0	0	0	0	0	0		1	1	1	1	1	1	1	1	2	1	1	1	1	1	1	1	1	1		0.9176	0.379478	0.849979	0.921065	0.655136	0.406934	0.283286	0.61885	0.976801
lpg0246, lpg1621	2	13	3	8	11	4	10	2	0	0	0	1	1	5	4	8	0	0	1	1		4	9	12	5	11	3	1	1	1	2	2	6	5	9	1	1	2	2		3.6704	3.4153	10.1997	4.60532	7.2065	1.2208	0.283286	0.61885	0.4884
lpg0246, lpg1621, lpg2552	3	4	0	0	0	2	0	0	0	0	0	0	1	0	1	1	0	0	0	0		1	1	1	3	1	1	1	1	1	1	2	1	2	2	1	1	1	1		0.9176	0.379478	0.849979	2.76319	0.655136	0.406934	0.283286	0.61885	0.4884
lpg0246, lpg1621, lpg2584	3	9	0	0	0	0	0	8	19	11	2	2	0	0	0	0	4	3	2	1		1	1	1	1	1	9	20	12	3	3	1	1	1	1	5	4	3	2		0.9176	0.379478	0.849979	0.921065	0.655136	3.66241	5.66572	7.4262	1.4652
lpg0246, lpg1661	2	8	11	7	3	10	0	0	0	0	0	0	19	34	7	15	0	0	0	0		12	8	4	11	1	1	1	1	1	1	20	35	8	16	1	1	1	1		11.0112	3.03582	3.39992	10.1317	0.655136	0.406934	0.283286	0.61885	0.4884
lpg0246, lpg1701	2	1	0	0	0	0	0	0	0	0	0	0	0	0	0	0	0	0	0	1		1	1	1	1	1	1	1	1	1	1	1	1	1	1	1	1	1	2		0.9176	0.379478	0.849979	0.921065	0.655136	0.406934	0.283286	0.61885	0.4884
lpg0246, lpg1701, lpg1702	3	1	0	0	0	0	0	0	0	0	0	0	0	0	0	1	0	0	0	0		1	1	1	1	1	1	1	1	1	1	1	1	1	2	1	1	1	1		0.9176	0.379478	0.849979	0.921065	0.655136	0.406934	0.283286	0.61885	0.4884
lpg0246, lpg1701, lpg2692	3	1	0	0	0	0	0	0	0	0	0	0	0	0	0	0	2	0	0	0		1	1	1	1	1	1	1	1	1	1	1	1	1	1	3	1	1	1		0.9176	0.379478	0.849979	0.921065	0.655136	0.406934	0.283286	0.61885	0.4884
lpg0246, lpg1702	2	9	9	70	31	8	12	0	0	0	0	0	7	42	17	44	0	0	0	0		10	71	32	9	13	1	1	1	1	1	8	43	18	45	1	1	1	1		9.176	26.9429	27.1993	8.28958	8.51677	0.406934	0.283286	0.61885	0.4884
lpg0246, lpg1907	2	1	0	0	0	0	0	0	0	0	0	0	0	1	0	0	0	0	0	0		1	1	1	1	1	1	1	1	1	1	1	2	1	1	1	1	1	1		0.9176	0.379478	0.849979	0.921065	0.655136	0.406934	0.283286	0.61885	0.4884
lpg0246, lpg1907, lpg1959	3	2	0	0	1	0	0	0	0	0	0	0	0	0	0	1	0	0	0	0		1	1	2	1	1	1	1	1	1	1	1	1	1	2	1	1	1	1		0.9176	0.379478	1.69996	0.921065	0.655136	0.406934	0.283286	0.61885	0.4884
lpg0246, lpg1907, lpg1959, lpg2584	4	2	0	0	0	0	0	0	0	0	0	0	0	3	0	4	0	0	0	0		1	1	1	1	1	1	1	1	1	1	1	4	1	5	1	1	1	1		0.9176	0.379478	0.849979	0.921065	0.655136	0.406934	0.283286	0.61885	0.4884
lpg0246, lpg1959, lpg2584	3	1	0	1	0	0	0	0	0	0	0	0	0	0	0	0	0	0	0	0		1	2	1	1	1	1	1	1	1	1	1	1	1	1	1	1	1	1		0.9176	0.758956	0.849979	0.921065	0.655136	0.406934	0.283286	0.61885	0.4884
lpg0246, lpg2223	2	2	0	0	0	0	0	0	0	0	0	0	0	0	2	2	0	0	0	0		1	1	1	1	1	1	1	1	1	1	1	1	3	3	1	1	1	1		0.9176	0.379478	0.849979	0.921065	0.655136	0.406934	0.283286	0.61885	0.4884
lpg0246, lpg2244	2	7	0	0	0	0	0	3	7	3	2	2	0	0	0	0	0	1	0	1		1	1	1	1	1	4	8	4	3	3	1	1	1	1	1	2	1	2		0.9176	0.379478	0.849979	0.921065	0.655136	1.62774	2.26629	2.4754	1.4652
lpg0246, lpg2244, lpg2628	3	10	0	0	0	0	0	12	45	25	6	23	0	0	1	0	11	20	12	34		1	1	1	1	1	13	46	26	7	24	1	1	2	1	12	21	13	35		0.9176	0.379478	0.849979	0.921065	0.655136	5.29014	13.0312	16.0901	3.4188
lpg0246, lpg2552	2	9	9	67	22	6	10	0	0	0	0	0	9	20	14	29	0	0	0	0		10	68	23	7	11	1	1	1	1	1	10	21	15	30	1	1	1	1		9.176	25.8045	19.5495	6.44745	7.2065	0.406934	0.283286	0.61885	0.4884
lpg0246, lpg2552, lpg2692, lpg2804	4	1	0	0	0	0	0	0	0	0	0	0	0	1	0	0	0	0	0	0		1	1	1	1	1	1	1	1	1	1	1	2	1	1	1	1	1	1		0.9176	0.379478	0.849979	0.921065	0.655136	0.406934	0.283286	0.61885	0.4884
lpg0246, lpg2584	2	3	0	0	0	0	0	0	2	2	0	1	0	0	0	0	0	0	0	0		1	1	1	1	1	1	3	3	1	2	1	1	1	1	1	1	1	1		0.9176	0.379478	0.849979	0.921065	0.655136	0.406934	0.849858	1.85655	0.4884
lpg0246, lpg2584, lpg2804	3	1	0	0	0	0	0	0	0	0	0	0	0	0	0	1	0	0	0	0		1	1	1	1	1	1	1	1	1	1	1	1	1	2	1	1	1	1		0.9176	0.379478	0.849979	0.921065	0.655136	0.406934	0.283286	0.61885	0.4884
lpg0246, lpg2628	2	8	0	0	0	0	0	3	10	6	0	5	0	0	0	0	1	1	4	1		1	1	1	1	1	4	11	7	1	6	1	1	1	1	2	2	5	2		0.9176	0.379478	0.849979	0.921065	0.655136	1.62774	3.11615	4.33195	0.4884
lpg0246, lpg2692	2	2	0	0	0	0	0	2	1	0	0	0	0	0	0	0	0	0	0	0		1	1	1	1	1	3	2	1	1	1	1	1	1	1	1	1	1	1		0.9176	0.379478	0.849979	0.921065	0.655136	1.2208	0.566572	0.61885	0.4884
lpg0246, lpg2804	2	3	0	0	0	0	0	0	0	0	0	0	167	15	0	14	0	0	0	0		1	1	1	1	1	1	1	1	1	1	168	16	1	15	1	1	1	1		0.9176	0.379478	0.849979	0.921065	0.655136	0.406934	0.283286	0.61885	0.4884
lpg0246, lpg2815	2	5	0	0	0	0	0	80	0	0	59	0	0	0	0	0	0	84	37	70		1	1	1	1	1	81	1	1	60	1	1	1	1	1	1	85	38	71		0.9176	0.379478	0.849979	0.921065	0.655136	32.9617	0.283286	0.61885	29.304
lpg0246, lpg2874	2	9	0	0	0	0	0	7	4	7	1	2	0	0	0	0	4	2	3	2		1	1	1	1	1	8	5	8	2	3	1	1	1	1	5	3	4	3		0.9176	0.379478	0.849979	0.921065	0.655136	3.25547	1.41643	4.9508	0.976801
lpg0246, lpg2885	2	5	0	0	0	0	0	0	0	1	3	1	0	0	0	0	0	0	2	1		1	1	1	1	1	1	1	2	4	2	1	1	1	1	1	1	3	2		0.9176	0.379478	0.849979	0.921065	0.655136	0.406934	0.283286	1.2377	1.9536
lpg0246, lpg2888	2	9	5	5	1	1	2	0	0	0	0	0	1	5	2	3	0	0	0	0		6	6	2	2	3	1	1	1	1	1	2	6	3	4	1	1	1	1		5.5056	2.27687	1.69996	1.84213	1.96541	0.406934	0.283286	0.61885	0.4884
lpg0246, lpg2888, lpg3000	3	3	1	1	0	1	0	0	0	0	0	0	0	0	0	0	0	0	0	0		2	2	1	2	1	1	1	1	1	1	1	1	1	1	1	1	1	1		1.8352	0.758956	0.849979	1.84213	0.655136	0.406934	0.283286	0.61885	0.4884
lpg0246, lpg3000	2	2	0	1	0	0	0	0	0	0	0	0	0	0	0	1	0	0	0	0		1	2	1	1	1	1	1	1	1	1	1	1	1	2	1	1	1	1		0.9176	0.758956	0.849979	0.921065	0.655136	0.406934	0.283286	0.61885	0.4884
lpg0404	1	14	2	0	0	3	0	32	9	5	40	14	2	0	5	3	20	29	42	32		3	1	1	4	1	33	10	6	41	15	3	1	6	4	21	30	43	33		2.7528	0.379478	0.849979	3.68426	0.655136	13.4288	2.83286	3.7131	20.0244
lpg0404, lpg0439	2	2	0	0	0	0	0	0	0	0	1	0	0	0	0	0	0	0	1	0		1	1	1	1	1	1	1	1	2	1	1	1	1	1	1	1	2	1		0.9176	0.379478	0.849979	0.921065	0.655136	0.406934	0.283286	0.61885	0.976801
lpg0404, lpg0439, lpg0879, lpg1689, lpg2552, lpg2815, lpg2874	7	1	0	0	0	0	0	0	0	0	1	0	0	0	0	0	0	0	0	0		1	1	1	1	1	1	1	1	2	1	1	1	1	1	1	1	1	1		0.9176	0.379478	0.849979	0.921065	0.655136	0.406934	0.283286	0.61885	0.976801
lpg0404, lpg0439, lpg1525	3	2	0	0	0	0	0	1	0	0	0	0	0	0	0	0	0	1	0	0		1	1	1	1	1	2	1	1	1	1	1	1	1	1	1	2	1	1		0.9176	0.379478	0.849979	0.921065	0.655136	0.813868	0.283286	0.61885	0.4884
lpg0404, lpg0439, lpg1525, lpg1701	4	7	0	0	0	0	0	1	1	0	2	0	0	0	0	0	2	1	1	2		1	1	1	1	1	2	2	1	3	1	1	1	1	1	3	2	2	3		0.9176	0.379478	0.849979	0.921065	0.655136	0.813868	0.566572	0.61885	1.4652
lpg0404, lpg0439, lpg1525, lpg1701, lpg2692	5	9	0	0	0	0	0	5	4	2	5	3	0	0	0	0	8	4	4	3		1	1	1	1	1	6	5	3	6	4	1	1	1	1	9	5	5	4		0.9176	0.379478	0.849979	0.921065	0.655136	2.4416	1.41643	1.85655	2.9304
lpg0404, lpg0439, lpg1525, lpg2692	4	3	0	0	0	0	0	3	0	0	1	0	0	0	0	0	0	2	0	0		1	1	1	1	1	4	1	1	2	1	1	1	1	1	1	3	1	1		0.9176	0.379478	0.849979	0.921065	0.655136	1.62774	0.283286	0.61885	0.976801
lpg0404, lpg0439, lpg1701	3	4	0	0	0	0	0	2	1	0	1	0	0	0	0	0	0	2	0	0		1	1	1	1	1	3	2	1	2	1	1	1	1	1	1	3	1	1		0.9176	0.379478	0.849979	0.921065	0.655136	1.2208	0.566572	0.61885	0.976801
lpg0404, lpg0439, lpg1701, lpg2692	4	5	0	0	0	0	0	1	0	0	1	0	0	0	0	0	3	4	0	1		1	1	1	1	1	2	1	1	2	1	1	1	1	1	4	5	1	2		0.9176	0.379478	0.849979	0.921065	0.655136	0.813868	0.283286	0.61885	0.976801
lpg0404, lpg0439, lpg2584, lpg2692, lpg2884	5	1	0	0	0	0	0	0	0	0	0	0	0	0	0	0	0	1	0	0		1	1	1	1	1	1	1	1	1	1	1	1	1	1	1	2	1	1		0.9176	0.379478	0.849979	0.921065	0.655136	0.406934	0.283286	0.61885	0.4884
lpg0404, lpg0439, lpg2692	3	2	0	0	0	0	0	0	0	0	0	0	0	0	0	0	0	1	1	0		1	1	1	1	1	1	1	1	1	1	1	1	1	1	1	2	2	1		0.9176	0.379478	0.849979	0.921065	0.655136	0.406934	0.283286	0.61885	0.4884
lpg0404, lpg0518	2	8	3	1	2	0	1	0	0	0	0	0	3	1	2	1	0	0	0	0		4	2	3	1	2	1	1	1	1	1	4	2	3	2	1	1	1	1		3.6704	0.758956	2.54994	0.921065	1.31027	0.406934	0.283286	0.61885	0.4884
lpg0404, lpg0518, lpg0621	3	9	21	6	3	18	1	0	0	0	0	0	10	6	20	10	0	0	0	0		22	7	4	19	2	1	1	1	1	1	11	7	21	11	1	1	1	1		20.1872	2.65634	3.39992	17.5002	1.31027	0.406934	0.283286	0.61885	0.4884
lpg0404, lpg0621	2	8	0	0	0	1	0	2	0	1	2	0	2	0	1	2	1	0	0	0		1	1	1	2	1	3	1	2	3	1	3	1	2	3	2	1	1	1		0.9176	0.379478	0.849979	1.84213	0.655136	1.2208	0.283286	1.2377	1.4652
lpg0404, lpg0621, lpg2584, lpg2885, lpg3000	5	1	0	0	0	0	0	0	0	0	0	1	0	0	0	0	0	0	0	0		1	1	1	1	1	1	1	1	1	2	1	1	1	1	1	1	1	1		0.9176	0.379478	0.849979	0.921065	0.655136	0.406934	0.283286	0.61885	0.4884
lpg0404, lpg0621, lpg2874	3	9	0	0	0	0	0	13	1	2	15	5	0	0	0	0	11	13	14	9		1	1	1	1	1	14	2	3	16	6	1	1	1	1	12	14	15	10		0.9176	0.379478	0.849979	0.921065	0.655136	5.69708	0.566572	1.85655	7.81441
lpg0404, lpg0716, lpg0879	3	3	0	0	0	0	0	0	2	0	4	0	0	0	0	0	0	0	2	0		1	1	1	1	1	1	3	1	5	1	1	1	1	1	1	1	3	1		0.9176	0.379478	0.849979	0.921065	0.655136	0.406934	0.849858	0.61885	2.442
lpg0404, lpg0716, lpg0879, lpg2223	4	9	0	0	0	0	0	3	2	1	18	2	0	0	0	0	3	3	5	1		1	1	1	1	1	4	3	2	19	3	1	1	1	1	4	4	6	2		0.9176	0.379478	0.849979	0.921065	0.655136	1.62774	0.849858	1.2377	9.27961
lpg0404, lpg0716, lpg1959	3	4	1	0	0	1	0	0	0	0	0	0	1	0	2	0	0	0	0	0		2	1	1	2	1	1	1	1	1	1	2	1	3	1	1	1	1	1		1.8352	0.379478	0.849979	1.84213	0.655136	0.406934	0.283286	0.61885	0.4884
lpg0404, lpg0716, lpg2223	3	1	0	0	0	0	0	0	0	0	1	0	0	0	0	0	0	0	0	0		1	1	1	1	1	1	1	1	2	1	1	1	1	1	1	1	1	1		0.9176	0.379478	0.849979	0.921065	0.655136	0.406934	0.283286	0.61885	0.976801
lpg0404, lpg0716, lpg2271, lpg2804, lpg2888	5	1	0	0	0	0	0	0	0	0	0	0	0	0	0	0	0	0	1	0		1	1	1	1	1	1	1	1	1	1	1	1	1	1	1	1	2	1		0.9176	0.379478	0.849979	0.921065	0.655136	0.406934	0.283286	0.61885	0.4884
lpg0404, lpg0879	2	3	0	0	0	0	0	1	0	0	4	0	0	0	0	0	2	0	0	0		1	1	1	1	1	2	1	1	5	1	1	1	1	1	3	1	1	1		0.9176	0.379478	0.849979	0.921065	0.655136	0.813868	0.283286	0.61885	2.442
lpg0404, lpg0879, lpg2223	3	2	0	0	0	0	0	3	0	0	4	0	0	0	0	0	0	0	0	0		1	1	1	1	1	4	1	1	5	1	1	1	1	1	1	1	1	1		0.9176	0.379478	0.849979	0.921065	0.655136	1.62774	0.283286	0.61885	2.442
lpg0404, lpg0879, lpg2888	3	9	0	0	0	0	0	20	5	2	32	2	0	0	0	0	11	10	12	4		1	1	1	1	1	21	6	3	33	3	1	1	1	1	12	11	13	5		0.9176	0.379478	0.849979	0.921065	0.655136	8.54562	1.69972	1.85655	16.1172
lpg0404, lpg0963	2	1	0	0	0	0	0	0	0	0	0	0	0	0	0	0	0	0	0	1		1	1	1	1	1	1	1	1	1	1	1	1	1	1	1	1	1	2		0.9176	0.379478	0.849979	0.921065	0.655136	0.406934	0.283286	0.61885	0.4884
lpg0404, lpg0963, lpg1137, lpg1525, lpg1701, lpg1702, lpg2884, lpg2885	8	1	0	0	0	0	0	0	0	0	0	0	0	0	0	0	0	0	0	1		1	1	1	1	1	1	1	1	1	1	1	1	1	1	1	1	1	2		0.9176	0.379478	0.849979	0.921065	0.655136	0.406934	0.283286	0.61885	0.4884
lpg0404, lpg0963, lpg1527, lpg2584, lpg2804, lpg2884, lpg2885	7	1	0	0	0	0	0	0	0	0	0	0	0	0	0	0	0	0	0	1		1	1	1	1	1	1	1	1	1	1	1	1	1	1	1	1	1	2		0.9176	0.379478	0.849979	0.921065	0.655136	0.406934	0.283286	0.61885	0.4884
lpg0404, lpg0963, lpg1527, lpg2804, lpg2884	5	1	0	0	0	0	0	0	0	0	0	0	0	0	0	0	0	0	1	0		1	1	1	1	1	1	1	1	1	1	1	1	1	1	1	1	2	1		0.9176	0.379478	0.849979	0.921065	0.655136	0.406934	0.283286	0.61885	0.4884
lpg0404, lpg0963, lpg1621	3	1	0	0	0	0	0	0	0	0	0	0	0	0	0	2	0	0	0	0		1	1	1	1	1	1	1	1	1	1	1	1	1	3	1	1	1	1		0.9176	0.379478	0.849979	0.921065	0.655136	0.406934	0.283286	0.61885	0.4884
lpg0404, lpg0963, lpg1661	3	3	0	0	0	0	0	1	0	0	0	0	0	0	0	0	0	0	1	2		1	1	1	1	1	2	1	1	1	1	1	1	1	1	1	1	2	3		0.9176	0.379478	0.849979	0.921065	0.655136	0.813868	0.283286	0.61885	0.4884
lpg0404, lpg0963, lpg2584, lpg2804, lpg2884	5	1	0	0	0	0	0	0	0	0	0	0	0	0	0	0	0	0	0	1		1	1	1	1	1	1	1	1	1	1	1	1	1	1	1	1	1	2		0.9176	0.379478	0.849979	0.921065	0.655136	0.406934	0.283286	0.61885	0.4884
lpg0404, lpg0963, lpg2584, lpg2884, lpg2885	5	1	0	0	0	0	0	0	0	0	0	0	0	0	0	0	0	0	1	0		1	1	1	1	1	1	1	1	1	1	1	1	1	1	1	1	2	1		0.9176	0.379478	0.849979	0.921065	0.655136	0.406934	0.283286	0.61885	0.4884
lpg0404, lpg1099	2	6	0	0	0	0	0	6	3	0	7	0	0	0	0	0	1	1	5	0		1	1	1	1	1	7	4	1	8	1	1	1	1	1	2	2	6	1		0.9176	0.379478	0.849979	0.921065	0.655136	2.84854	1.13314	0.61885	3.9072
lpg0404, lpg1099, lpg1137, lpg1907, lpg2628, lpg2806, lpg2815	7	1	0	0	0	0	0	0	0	0	0	0	0	0	0	0	0	0	0	1		1	1	1	1	1	1	1	1	1	1	1	1	1	1	1	1	1	2		0.9176	0.379478	0.849979	0.921065	0.655136	0.406934	0.283286	0.61885	0.4884
lpg0404, lpg1099, lpg1621, lpg1701, lpg1959, lpg2628, lpg2885, lpg2888	8	1	0	0	0	0	0	0	0	0	0	0	0	0	0	0	1	0	0	0		1	1	1	1	1	1	1	1	1	1	1	1	1	1	2	1	1	1		0.9176	0.379478	0.849979	0.921065	0.655136	0.406934	0.283286	0.61885	0.4884
lpg0404, lpg1099, lpg2584, lpg2628, lpg2885	5	1	0	0	0	0	0	0	0	0	0	0	0	0	0	0	1	0	0	0		1	1	1	1	1	1	1	1	1	1	1	1	1	1	2	1	1	1		0.9176	0.379478	0.849979	0.921065	0.655136	0.406934	0.283286	0.61885	0.4884
lpg0404, lpg1099, lpg2628	3	9	0	0	0	0	0	31	7	3	22	4	0	0	0	0	14	15	16	17		1	1	1	1	1	32	8	4	23	5	1	1	1	1	15	16	17	18		0.9176	0.379478	0.849979	0.921065	0.655136	13.0219	2.26629	2.4754	11.2332
lpg0404, lpg1099, lpg2885	3	7	0	0	0	0	0	22	0	1	5	2	0	0	0	0	6	0	9	3		1	1	1	1	1	23	1	2	6	3	1	1	1	1	7	1	10	4		0.9176	0.379478	0.849979	0.921065	0.655136	9.35949	0.283286	1.2377	2.9304
lpg0404, lpg1137	2	4	0	0	0	0	0	0	0	0	2	1	0	0	0	0	1	1	0	0		1	1	1	1	1	1	1	1	3	2	1	1	1	1	2	2	1	1		0.9176	0.379478	0.849979	0.921065	0.655136	0.406934	0.283286	0.61885	1.4652
lpg0404, lpg1137, lpg1907, lpg2584, lpg2815, lpg2884, lpg2885	7	1	0	0	0	0	0	0	0	0	0	0	0	0	0	0	1	0	0	0		1	1	1	1	1	1	1	1	1	1	1	1	1	1	2	1	1	1		0.9176	0.379478	0.849979	0.921065	0.655136	0.406934	0.283286	0.61885	0.4884
lpg0404, lpg1137, lpg2733	3	3	0	0	0	0	0	0	0	0	0	1	0	0	0	0	0	1	3	0		1	1	1	1	1	1	1	1	1	2	1	1	1	1	1	2	4	1		0.9176	0.379478	0.849979	0.921065	0.655136	0.406934	0.283286	0.61885	0.4884
lpg0404, lpg1525	2	3	0	0	0	0	0	1	0	0	1	0	0	0	0	0	0	0	1	0		1	1	1	1	1	2	1	1	2	1	1	1	1	1	1	1	2	1		0.9176	0.379478	0.849979	0.921065	0.655136	0.813868	0.283286	0.61885	0.976801
lpg0404, lpg1525, lpg1701	3	6	0	0	0	0	0	4	0	0	2	0	0	0	0	0	2	4	2	1		1	1	1	1	1	5	1	1	3	1	1	1	1	1	3	5	3	2		0.9176	0.379478	0.849979	0.921065	0.655136	2.03467	0.283286	0.61885	1.4652
lpg0404, lpg1525, lpg1701, lpg2692	4	5	0	0	0	0	0	3	0	0	2	0	0	0	0	0	2	1	1	0		1	1	1	1	1	4	1	1	3	1	1	1	1	1	3	2	2	1		0.9176	0.379478	0.849979	0.921065	0.655136	1.62774	0.283286	0.61885	1.4652
lpg0404, lpg1525, lpg2692	3	3	0	0	0	0	0	1	0	0	1	0	0	0	0	0	0	1	0	0		1	1	1	1	1	2	1	1	2	1	1	1	1	1	1	2	1	1		0.9176	0.379478	0.849979	0.921065	0.655136	0.813868	0.283286	0.61885	0.976801
lpg0404, lpg1621	2	10	0	0	0	0	1	10	1	1	10	0	3	0	3	0	8	1	5	0		1	1	1	1	2	11	2	2	11	1	4	1	4	1	9	2	6	1		0.9176	0.379478	0.849979	0.921065	1.31027	4.47628	0.566572	1.2377	5.37241
lpg0404, lpg1621, lpg1701, lpg1702, lpg1959, lpg2885, lpg2888	7	1	0	0	0	0	0	0	0	0	0	0	0	0	0	0	0	0	1	0		1	1	1	1	1	1	1	1	1	1	1	1	1	1	1	1	2	1		0.9176	0.379478	0.849979	0.921065	0.655136	0.406934	0.283286	0.61885	0.4884
lpg0404, lpg1621, lpg1701, lpg1959, lpg2584, lpg2884, lpg2885, lpg2888	8	1	0	0	0	0	0	0	0	0	0	0	0	0	0	0	0	0	1	0		1	1	1	1	1	1	1	1	1	1	1	1	1	1	1	1	2	1		0.9176	0.379478	0.849979	0.921065	0.655136	0.406934	0.283286	0.61885	0.4884
lpg0404, lpg1621, lpg1701, lpg2584, lpg2885	5	1	0	0	0	0	0	0	0	0	0	0	0	0	0	0	0	0	0	1		1	1	1	1	1	1	1	1	1	1	1	1	1	1	1	1	1	2		0.9176	0.379478	0.849979	0.921065	0.655136	0.406934	0.283286	0.61885	0.4884
lpg0404, lpg1621, lpg1701, lpg2884, lpg2885, lpg2888	6	1	0	0	0	0	0	0	0	0	0	0	0	0	0	0	0	0	0	1		1	1	1	1	1	1	1	1	1	1	1	1	1	1	1	1	1	2		0.9176	0.379478	0.849979	0.921065	0.655136	0.406934	0.283286	0.61885	0.4884
lpg0404, lpg1621, lpg2552	3	3	0	0	1	1	0	0	0	0	0	0	0	0	1	0	0	0	0	0		1	1	2	2	1	1	1	1	1	1	1	1	2	1	1	1	1	1		0.9176	0.379478	1.69996	1.84213	0.655136	0.406934	0.283286	0.61885	0.4884
lpg0404, lpg1621, lpg2815	3	5	0	0	0	7	0	0	0	0	0	0	4	1	7	4	0	0	0	0		1	1	1	8	1	1	1	1	1	1	5	2	8	5	1	1	1	1		0.9176	0.379478	0.849979	7.36852	0.655136	0.406934	0.283286	0.61885	0.4884
lpg0404, lpg1661, lpg2584	3	1	0	0	0	0	0	0	0	0	0	0	0	0	0	0	0	0	0	1		1	1	1	1	1	1	1	1	1	1	1	1	1	1	1	1	1	2		0.9176	0.379478	0.849979	0.921065	0.655136	0.406934	0.283286	0.61885	0.4884
lpg0404, lpg1701	2	4	0	0	0	0	0	0	1	1	0	0	0	0	0	0	1	0	1	0		1	1	1	1	1	1	2	2	1	1	1	1	1	1	2	1	2	1		0.9176	0.379478	0.849979	0.921065	0.655136	0.406934	0.566572	1.2377	0.4884
lpg0404, lpg1701, lpg2692	3	5	0	0	0	0	0	1	0	1	2	0	0	0	0	0	1	1	0	0		1	1	1	1	1	2	1	2	3	1	1	1	1	1	2	2	1	1		0.9176	0.379478	0.849979	0.921065	0.655136	0.813868	0.283286	1.2377	1.4652
lpg0404, lpg1701, lpg2806	3	3	0	0	0	0	0	1	0	0	3	0	0	0	0	0	0	0	2	0		1	1	1	1	1	2	1	1	4	1	1	1	1	1	1	1	3	1		0.9176	0.379478	0.849979	0.921065	0.655136	0.813868	0.283286	0.61885	1.9536
lpg0404, lpg1702	2	4	0	0	0	0	0	24	0	0	0	0	0	0	0	0	0	12	18	21		1	1	1	1	1	25	1	1	1	1	1	1	1	1	1	13	19	22		0.9176	0.379478	0.849979	0.921065	0.655136	10.1734	0.283286	0.61885	0.4884
lpg0404, lpg1776	2	5	0	0	0	0	0	2	0	0	2	0	0	0	0	0	2	0	1	1		1	1	1	1	1	3	1	1	3	1	1	1	1	1	3	1	2	2		0.9176	0.379478	0.849979	0.921065	0.655136	1.2208	0.283286	0.61885	1.4652
lpg0404, lpg1776, lpg2815	3	6	0	0	0	0	0	16	0	0	14	0	0	0	0	0	14	2	10	5		1	1	1	1	1	17	1	1	15	1	1	1	1	1	15	3	11	6		0.9176	0.379478	0.849979	0.921065	0.655136	6.91788	0.283286	0.61885	7.32601
lpg0404, lpg1907	2	2	0	0	1	0	0	0	0	0	0	0	0	0	0	0	0	0	2	0		1	1	2	1	1	1	1	1	1	1	1	1	1	1	1	1	3	1		0.9176	0.379478	1.69996	0.921065	0.655136	0.406934	0.283286	0.61885	0.4884
lpg0404, lpg1907, lpg2271	3	4	1	1	0	4	2	0	0	0	0	0	0	0	0	0	0	0	0	0		2	2	1	5	3	1	1	1	1	1	1	1	1	1	1	1	1	1		1.8352	0.758956	0.849979	4.60532	1.96541	0.406934	0.283286	0.61885	0.4884
lpg0404, lpg1907, lpg2885	3	7	0	0	0	0	0	14	0	1	6	0	0	0	0	0	9	2	4	3		1	1	1	1	1	15	1	2	7	1	1	1	1	1	10	3	5	4		0.9176	0.379478	0.849979	0.921065	0.655136	6.10401	0.283286	1.2377	3.4188
lpg0404, lpg1959	2	1	0	0	0	0	0	0	0	0	0	0	1	0	0	0	0	0	0	0		1	1	1	1	1	1	1	1	1	1	2	1	1	1	1	1	1	1		0.9176	0.379478	0.849979	0.921065	0.655136	0.406934	0.283286	0.61885	0.4884
lpg0404, lpg2223	2	2	0	0	0	0	0	0	0	0	1	0	0	0	0	0	0	0	1	0		1	1	1	1	1	1	1	1	2	1	1	1	1	1	1	1	2	1		0.9176	0.379478	0.849979	0.921065	0.655136	0.406934	0.283286	0.61885	0.976801
lpg0404, lpg2223, lpg2584, lpg2733, lpg2874, lpg2884, lpg2885	7	1	0	0	0	0	0	0	0	0	0	0	0	0	0	0	0	1	0	0		1	1	1	1	1	1	1	1	1	1	1	1	1	1	1	2	1	1		0.9176	0.379478	0.849979	0.921065	0.655136	0.406934	0.283286	0.61885	0.4884
lpg0404, lpg2244, lpg2584, lpg2815, lpg2884, lpg2885	6	1	0	0	0	0	0	0	0	0	0	0	0	0	0	0	0	0	1	0		1	1	1	1	1	1	1	1	1	1	1	1	1	1	1	1	2	1		0.9176	0.379478	0.849979	0.921065	0.655136	0.406934	0.283286	0.61885	0.4884
lpg0404, lpg2271	2	1	0	0	0	1	0	0	0	0	0	0	0	0	0	0	0	0	0	0		1	1	1	2	1	1	1	1	1	1	1	1	1	1	1	1	1	1		0.9176	0.379478	0.849979	1.84213	0.655136	0.406934	0.283286	0.61885	0.4884
lpg0404, lpg2552	2	11	0	0	0	2	0	37	5	5	12	4	0	0	0	1	22	15	17	6		1	1	1	3	1	38	6	6	13	5	1	1	1	2	23	16	18	7		0.9176	0.379478	0.849979	2.76319	0.655136	15.4635	1.69972	3.7131	6.34921
lpg0404, lpg2552, lpg2584, lpg2884, lpg2885	5	1	0	0	0	0	0	0	0	0	0	0	0	0	0	0	2	0	0	0		1	1	1	1	1	1	1	1	1	1	1	1	1	1	3	1	1	1		0.9176	0.379478	0.849979	0.921065	0.655136	0.406934	0.283286	0.61885	0.4884
lpg0404, lpg2552, lpg2884, lpg2885	4	1	0	0	0	0	0	0	0	0	0	0	0	0	0	0	0	0	1	0		1	1	1	1	1	1	1	1	1	1	1	1	1	1	1	1	2	1		0.9176	0.379478	0.849979	0.921065	0.655136	0.406934	0.283286	0.61885	0.4884
lpg0404, lpg2552, lpg2888	3	1	0	0	0	0	0	0	0	0	0	0	0	0	1	0	0	0	0	0		1	1	1	1	1	1	1	1	1	1	1	1	2	1	1	1	1	1		0.9176	0.379478	0.849979	0.921065	0.655136	0.406934	0.283286	0.61885	0.4884
lpg0404, lpg2584	2	10	0	0	0	0	0	15	13	2	29	23	0	0	1	0	29	41	43	25		1	1	1	1	1	16	14	3	30	24	1	1	2	1	30	42	44	26		0.9176	0.379478	0.849979	0.921065	0.655136	6.51095	3.96601	1.85655	14.652
lpg0404, lpg2584, lpg2692, lpg2884, lpg2885	5	3	0	0	0	0	0	0	0	0	0	1	0	0	0	0	0	1	1	0		1	1	1	1	1	1	1	1	1	2	1	1	1	1	1	2	2	1		0.9176	0.379478	0.849979	0.921065	0.655136	0.406934	0.283286	0.61885	0.4884
lpg0404, lpg2584, lpg2733	3	2	0	0	0	0	0	0	0	0	2	0	0	0	0	0	1	0	0	0		1	1	1	1	1	1	1	1	3	1	1	1	1	1	2	1	1	1		0.9176	0.379478	0.849979	0.921065	0.655136	0.406934	0.283286	0.61885	1.4652
lpg0404, lpg2584, lpg2884	3	10	0	0	0	0	0	58	37	19	86	90	0	0	1	0	58	170	158	106		1	1	1	1	1	59	38	20	87	91	1	1	2	1	59	171	159	107		0.9176	0.379478	0.849979	0.921065	0.655136	24.0091	10.7649	12.377	42.4908
lpg0404, lpg2584, lpg2884, lpg2885	4	11	0	0	0	0	0	479	311	166	804	840	0	0	7	1	949	1711	1421	950		1	1	1	1	1	480	312	167	805	841	1	1	8	2	950	1712	1422	951		0.9176	0.379478	0.849979	0.921065	0.655136	195.328	88.3853	103.348	393.162
lpg0404, lpg2584, lpg2884, lpg2885, lpg3000	5	1	0	0	0	0	0	0	0	0	0	0	0	0	0	0	0	0	0	1		1	1	1	1	1	1	1	1	1	1	1	1	1	1	1	1	1	2		0.9176	0.379478	0.849979	0.921065	0.655136	0.406934	0.283286	0.61885	0.4884
lpg0404, lpg2584, lpg2885	3	10	0	0	0	0	0	147	59	19	154	106	0	0	3	0	157	272	225	151		1	1	1	1	1	148	60	20	155	107	1	1	4	1	158	273	226	152		0.9176	0.379478	0.849979	0.921065	0.655136	60.2263	16.9972	12.377	75.7021
lpg0404, lpg2628	2	9	0	0	0	0	0	4	1	0	1	3	0	0	1	0	1	1	2	1		1	1	1	1	1	5	2	1	2	4	1	1	2	1	2	2	3	2		0.9176	0.379478	0.849979	0.921065	0.655136	2.03467	0.566572	0.61885	0.976801
lpg0404, lpg2628, lpg2874	3	7	2	0	0	1	0	0	0	0	0	0	1	1	2	1	0	0	1	0		3	1	1	2	1	1	1	1	1	1	2	2	3	2	1	1	2	1		2.7528	0.379478	0.849979	1.84213	0.655136	0.406934	0.283286	0.61885	0.4884
lpg0404, lpg2628, lpg2874, lpg2884	4	7	0	2	1	20	0	0	0	0	0	0	10	6	21	19	0	0	0	0		1	3	2	21	1	1	1	1	1	1	11	7	22	20	1	1	1	1		0.9176	1.13843	1.69996	19.3424	0.655136	0.406934	0.283286	0.61885	0.4884
lpg0404, lpg2628, lpg2884	3	4	0	0	0	4	0	0	0	0	0	0	1	0	3	2	0	0	0	0		1	1	1	5	1	1	1	1	1	1	2	1	4	3	1	1	1	1		0.9176	0.379478	0.849979	4.60532	0.655136	0.406934	0.283286	0.61885	0.4884
lpg0404, lpg2692	2	1	0	0	0	0	0	1	0	0	0	0	0	0	0	0	0	0	0	0		1	1	1	1	1	2	1	1	1	1	1	1	1	1	1	1	1	1		0.9176	0.379478	0.849979	0.921065	0.655136	0.813868	0.283286	0.61885	0.4884
lpg0404, lpg2733	2	1	0	0	0	0	0	0	1	0	0	0	0	0	0	0	0	0	0	0		1	1	1	1	1	1	2	1	1	1	1	1	1	1	1	1	1	1		0.9176	0.379478	0.849979	0.921065	0.655136	0.406934	0.566572	0.61885	0.4884
lpg0404, lpg2804	2	5	0	0	0	0	0	17	0	0	0	0	0	0	0	0	13	2	5	4		1	1	1	1	1	18	1	1	1	1	1	1	1	1	14	3	6	5		0.9176	0.379478	0.849979	0.921065	0.655136	7.32481	0.283286	0.61885	0.4884
lpg0404, lpg2815	2	6	0	0	0	1	0	2	0	0	1	0	2	0	0	0	1	0	2	0		1	1	1	2	1	3	1	1	2	1	3	1	1	1	2	1	3	1		0.9176	0.379478	0.849979	1.84213	0.655136	1.2208	0.283286	0.61885	0.976801
lpg0404, lpg2874	2	7	0	0	0	0	0	0	0	0	3	0	1	0	2	2	1	1	1	0		1	1	1	1	1	1	1	1	4	1	2	1	3	3	2	2	2	1		0.9176	0.379478	0.849979	0.921065	0.655136	0.406934	0.283286	0.61885	1.9536
lpg0404, lpg2874, lpg2884	3	5	1	0	0	2	0	0	0	0	0	0	0	2	2	2	0	0	0	0		2	1	1	3	1	1	1	1	1	1	1	3	3	3	1	1	1	1		1.8352	0.379478	0.849979	2.76319	0.655136	0.406934	0.283286	0.61885	0.4884
lpg0404, lpg2884	2	13	0	0	0	1	0	13	16	6	34	46	2	0	4	3	33	58	64	42		1	1	1	2	1	14	17	7	35	47	3	1	5	4	34	59	65	43		0.9176	0.379478	0.849979	1.84213	0.655136	5.69708	4.81586	4.33195	17.094
lpg0404, lpg2884, lpg2885	3	10	0	0	0	0	0	84	54	24	120	121	0	0	2	0	113	243	199	130		1	1	1	1	1	85	55	25	121	122	1	1	3	1	114	244	200	131		0.9176	0.379478	0.849979	0.921065	0.655136	34.5894	15.5807	15.4713	59.0965
lpg0404, lpg2884, lpg2888	3	8	4	3	1	7	0	0	0	0	0	0	5	2	12	7	0	0	0	0		5	4	2	8	1	1	1	1	1	1	6	3	13	8	1	1	1	1		4.588	1.51791	1.69996	7.36852	0.655136	0.406934	0.283286	0.61885	0.4884
lpg0404, lpg2885	2	10	0	0	0	0	0	28	16	6	45	25	0	0	1	0	33	51	64	46		1	1	1	1	1	29	17	7	46	26	1	1	2	1	34	52	65	47		0.9176	0.379478	0.849979	0.921065	0.655136	11.8011	4.81586	4.33195	22.4664
lpg0404, lpg2888	2	10	2	0	0	2	0	1	0	0	2	0	2	0	4	2	1	1	0	1		3	1	1	3	1	2	1	1	3	1	3	1	5	3	2	2	1	2		2.7528	0.379478	0.849979	2.76319	0.655136	0.813868	0.283286	0.61885	1.4652
lpg0439	1	18	54	298	113	50	179	32	46	26	29	39	61	166	66	104	23	63	17	25		55	299	114	51	180	33	47	27	30	40	62	167	67	105	24	64	18	26		50.468	113.464	96.8976	46.9743	117.925	13.4288	13.3144	16.709	14.652
lpg0439, lpg0518	2	3	0	0	0	0	0	0	4	0	1	1	0	0	0	0	0	0	0	0		1	1	1	1	1	1	5	1	2	2	1	1	1	1	1	1	1	1		0.9176	0.379478	0.849979	0.921065	0.655136	0.406934	1.41643	0.61885	0.976801
lpg0439, lpg0518, lpg0621, lpg0963, lpg1701, lpg1907, lpg2223	7	1	0	0	0	0	0	0	0	0	0	1	0	0	0	0	0	0	0	0		1	1	1	1	1	1	1	1	1	2	1	1	1	1	1	1	1	1		0.9176	0.379478	0.849979	0.921065	0.655136	0.406934	0.283286	0.61885	0.4884
lpg0439, lpg0518, lpg0879	3	1	0	0	0	0	0	0	1	0	0	0	0	0	0	0	0	0	0	0		1	1	1	1	1	1	2	1	1	1	1	1	1	1	1	1	1	1		0.9176	0.379478	0.849979	0.921065	0.655136	0.406934	0.566572	0.61885	0.4884
lpg0439, lpg0518, lpg0879, lpg2888	4	5	0	0	0	0	0	1	3	0	0	1	0	0	0	0	0	1	0	1		1	1	1	1	1	2	4	1	1	2	1	1	1	1	1	2	1	2		0.9176	0.379478	0.849979	0.921065	0.655136	0.813868	1.13314	0.61885	0.4884
lpg0439, lpg0518, lpg0963	3	4	0	0	0	0	0	0	1	1	1	0	0	0	0	0	0	1	0	0		1	1	1	1	1	1	2	2	2	1	1	1	1	1	1	2	1	1		0.9176	0.379478	0.849979	0.921065	0.655136	0.406934	0.566572	1.2377	0.976801
lpg0439, lpg0518, lpg0963, lpg1148, lpg1701, lpg2223, lpg2888	7	1	0	0	0	0	0	0	0	1	0	0	0	0	0	0	0	0	0	0		1	1	1	1	1	1	1	2	1	1	1	1	1	1	1	1	1	1		0.9176	0.379478	0.849979	0.921065	0.655136	0.406934	0.283286	1.2377	0.4884
lpg0439, lpg0518, lpg0963, lpg1527	4	7	0	0	0	0	0	3	3	1	2	3	0	0	0	0	0	1	1	0		1	1	1	1	1	4	4	2	3	4	1	1	1	1	1	2	2	1		0.9176	0.379478	0.849979	0.921065	0.655136	1.62774	1.13314	1.2377	1.4652
lpg0439, lpg0518, lpg0963, lpg1527, lpg1701	5	9	0	0	0	0	0	13	28	9	7	14	0	0	0	0	4	18	5	5		1	1	1	1	1	14	29	10	8	15	1	1	1	1	5	19	6	6		0.9176	0.379478	0.849979	0.921065	0.655136	5.69708	8.2153	6.1885	3.9072
lpg0439, lpg0518, lpg0963, lpg1527, lpg1701, lpg2223	6	9	0	0	0	0	0	127	349	177	112	281	0	0	0	0	118	263	55	130		1	1	1	1	1	128	350	178	113	282	1	1	1	1	119	264	56	131		0.9176	0.379478	0.849979	0.921065	0.655136	52.0876	99.1501	110.155	55.1893
lpg0439, lpg0518, lpg0963, lpg1527, lpg1701, lpg2223, lpg2692	7	1	0	0	0	0	0	0	0	0	0	1	0	0	0	0	0	0	0	0		1	1	1	1	1	1	1	1	1	2	1	1	1	1	1	1	1	1		0.9176	0.379478	0.849979	0.921065	0.655136	0.406934	0.283286	0.61885	0.4884
lpg0439, lpg0518, lpg0963, lpg1527, lpg2223	5	9	0	0	0	0	0	9	24	6	6	15	0	0	0	0	2	21	4	9		1	1	1	1	1	10	25	7	7	16	1	1	1	1	3	22	5	10		0.9176	0.379478	0.849979	0.921065	0.655136	4.06934	7.08215	4.33195	3.4188
lpg0439, lpg0518, lpg0963, lpg1701	4	7	0	0	0	0	0	1	5	3	1	4	0	0	0	0	0	5	1	0		1	1	1	1	1	2	6	4	2	5	1	1	1	1	1	6	2	1		0.9176	0.379478	0.849979	0.921065	0.655136	0.813868	1.69972	2.4754	0.976801
lpg0439, lpg0518, lpg0963, lpg1701, lpg2223	5	9	0	0	0	0	0	18	61	35	21	49	0	0	0	0	21	31	5	16		1	1	1	1	1	19	62	36	22	50	1	1	1	1	22	32	6	17		0.9176	0.379478	0.849979	0.921065	0.655136	7.73175	17.5637	22.2786	10.7448
lpg0439, lpg0518, lpg0963, lpg2223	4	8	0	0	0	0	0	1	7	4	2	3	0	0	0	0	2	1	0	2		1	1	1	1	1	2	8	5	3	4	1	1	1	1	3	2	1	3		0.9176	0.379478	0.849979	0.921065	0.655136	0.813868	2.26629	3.09425	1.4652
lpg0439, lpg0518, lpg1527	3	4	0	0	0	0	0	0	2	5	0	0	0	0	0	0	0	1	2	0		1	1	1	1	1	1	3	6	1	1	1	1	1	1	1	2	3	1		0.9176	0.379478	0.849979	0.921065	0.655136	0.406934	0.849858	3.7131	0.4884
lpg0439, lpg0518, lpg1527, lpg1701	4	9	0	0	0	0	0	3	2	4	2	3	0	0	0	0	3	3	3	1		1	1	1	1	1	4	3	5	3	4	1	1	1	1	4	4	4	2		0.9176	0.379478	0.849979	0.921065	0.655136	1.62774	0.849858	3.09425	1.4652
lpg0439, lpg0518, lpg1527, lpg1701, lpg2223	5	9	0	0	0	0	0	19	48	25	17	39	0	0	0	0	9	27	9	16		1	1	1	1	1	20	49	26	18	40	1	1	1	1	10	28	10	17		0.9176	0.379478	0.849979	0.921065	0.655136	8.13868	13.881	16.0901	8.79121
lpg0439, lpg0518, lpg1527, lpg1701, lpg2223, lpg2888	6	1	0	0	0	0	0	0	0	0	0	0	0	0	0	0	0	0	0	1		1	1	1	1	1	1	1	1	1	1	1	1	1	1	1	1	1	2		0.9176	0.379478	0.849979	0.921065	0.655136	0.406934	0.283286	0.61885	0.4884
lpg0439, lpg0518, lpg1527, lpg2223	4	8	0	0	0	0	0	4	10	3	4	3	0	0	0	0	3	5	3	0		1	1	1	1	1	5	11	4	5	4	1	1	1	1	4	6	4	1		0.9176	0.379478	0.849979	0.921065	0.655136	2.03467	3.11615	2.4754	2.442
lpg0439, lpg0518, lpg1621, lpg1701, lpg2628	5	1	0	0	0	0	0	0	1	0	0	0	0	0	0	0	0	0	0	0		1	1	1	1	1	1	2	1	1	1	1	1	1	1	1	1	1	1		0.9176	0.379478	0.849979	0.921065	0.655136	0.406934	0.566572	0.61885	0.4884
lpg0439, lpg0518, lpg1701	3	7	0	0	0	0	0	1	3	0	1	2	0	0	0	0	3	1	2	0		1	1	1	1	1	2	4	1	2	3	1	1	1	1	4	2	3	1		0.9176	0.379478	0.849979	0.921065	0.655136	0.813868	1.13314	0.61885	0.976801
lpg0439, lpg0518, lpg1701, lpg2223	4	8	0	0	0	0	0	3	11	13	4	10	0	0	0	0	3	9	0	3		1	1	1	1	1	4	12	14	5	11	1	1	1	1	4	10	1	4		0.9176	0.379478	0.849979	0.921065	0.655136	1.62774	3.39943	8.6639	2.442
lpg0439, lpg0518, lpg2223	3	6	0	0	0	0	0	1	3	1	1	1	0	0	0	0	0	2	0	0		1	1	1	1	1	2	4	2	2	2	1	1	1	1	1	3	1	1		0.9176	0.379478	0.849979	0.921065	0.655136	0.813868	1.13314	1.2377	0.976801
lpg0439, lpg0518, lpg2628, lpg2884	4	1	0	0	0	0	0	0	0	0	0	0	0	0	0	1	0	0	0	0		1	1	1	1	1	1	1	1	1	1	1	1	1	2	1	1	1	1		0.9176	0.379478	0.849979	0.921065	0.655136	0.406934	0.283286	0.61885	0.4884
lpg0439, lpg0518, lpg2888	3	3	0	0	0	0	0	0	1	0	1	0	0	0	0	0	1	0	0	0		1	1	1	1	1	1	2	1	2	1	1	1	1	1	2	1	1	1		0.9176	0.379478	0.849979	0.921065	0.655136	0.406934	0.566572	0.61885	0.976801
lpg0439, lpg0621, lpg1907, lpg2888	4	8	0	0	0	0	0	11	0	1	4	2	0	0	0	0	6	18	1	3		1	1	1	1	1	12	1	2	5	3	1	1	1	1	7	19	2	4		0.9176	0.379478	0.849979	0.921065	0.655136	4.88321	0.283286	1.2377	2.442
lpg0439, lpg0621, lpg2888	3	5	0	0	0	0	0	1	0	0	1	0	0	0	0	0	0	1	2	1		1	1	1	1	1	2	1	1	2	1	1	1	1	1	1	2	3	2		0.9176	0.379478	0.849979	0.921065	0.655136	0.813868	0.283286	0.61885	0.976801
lpg0439, lpg0716	2	4	0	0	0	1	0	0	1	2	0	0	0	0	0	0	0	3	0	0		1	1	1	2	1	1	2	3	1	1	1	1	1	1	1	4	1	1		0.9176	0.379478	0.849979	1.84213	0.655136	0.406934	0.566572	1.85655	0.4884
lpg0439, lpg0716, lpg1099	3	4	0	0	1	0	1	0	0	0	0	0	0	0	2	3	0	0	0	0		1	1	2	1	2	1	1	1	1	1	1	1	3	4	1	1	1	1		0.9176	0.379478	1.69996	0.921065	1.31027	0.406934	0.283286	0.61885	0.4884
lpg0439, lpg0716, lpg1099, lpg2885	4	9	2	5	4	14	6	0	0	0	0	0	3	12	7	25	0	0	0	0		3	6	5	15	7	1	1	1	1	1	4	13	8	26	1	1	1	1		2.7528	2.27687	4.24989	13.816	4.58595	0.406934	0.283286	0.61885	0.4884
lpg0439, lpg0716, lpg2874	3	9	0	0	0	0	0	5	9	6	8	6	0	0	0	0	12	12	3	6		1	1	1	1	1	6	10	7	9	7	1	1	1	1	13	13	4	7		0.9176	0.379478	0.849979	0.921065	0.655136	2.4416	2.83286	4.33195	4.3956
lpg0439, lpg0716, lpg2885	3	8	0	1	2	3	2	0	0	0	0	0	3	2	1	4	0	0	0	0		1	2	3	4	3	1	1	1	1	1	4	3	2	5	1	1	1	1		0.9176	0.758956	2.54994	3.68426	1.96541	0.406934	0.283286	0.61885	0.4884
lpg0439, lpg0879	2	2	0	0	0	0	0	0	0	0	0	0	0	0	0	0	1	0	1	0		1	1	1	1	1	1	1	1	1	1	1	1	1	1	2	1	2	1		0.9176	0.379478	0.849979	0.921065	0.655136	0.406934	0.283286	0.61885	0.4884
lpg0439, lpg0879, lpg1689	3	6	0	0	0	0	0	10	0	0	8	0	0	0	0	0	3	8	1	2		1	1	1	1	1	11	1	1	9	1	1	1	1	1	4	9	2	3		0.9176	0.379478	0.849979	0.921065	0.655136	4.47628	0.283286	0.61885	4.3956
lpg0439, lpg0879, lpg1689, lpg2815	4	6	0	0	0	0	0	11	0	0	5	0	0	0	0	0	5	11	3	6		1	1	1	1	1	12	1	1	6	1	1	1	1	1	6	12	4	7		0.9176	0.379478	0.849979	0.921065	0.655136	4.88321	0.283286	0.61885	2.9304
lpg0439, lpg0879, lpg1689, lpg2815, lpg2874	5	6	0	0	0	0	0	97	0	0	73	0	0	0	0	0	63	109	60	59		1	1	1	1	1	98	1	1	74	1	1	1	1	1	64	110	61	60		0.9176	0.379478	0.849979	0.921065	0.655136	39.8795	0.283286	0.61885	36.1416
lpg0439, lpg0879, lpg1689, lpg2874	4	6	0	0	0	0	0	29	0	0	23	0	0	0	0	0	14	17	18	12		1	1	1	1	1	30	1	1	24	1	1	1	1	1	15	18	19	13		0.9176	0.379478	0.849979	0.921065	0.655136	12.208	0.283286	0.61885	11.7216
lpg0439, lpg0879, lpg2815	3	4	0	0	0	0	0	2	0	0	1	0	0	0	0	0	1	1	0	0		1	1	1	1	1	3	1	1	2	1	1	1	1	1	2	2	1	1		0.9176	0.379478	0.849979	0.921065	0.655136	1.2208	0.283286	0.61885	0.976801
lpg0439, lpg0879, lpg2815, lpg2874	4	6	0	0	0	0	0	5	0	0	4	0	0	0	0	0	6	5	3	3		1	1	1	1	1	6	1	1	5	1	1	1	1	1	7	6	4	4		0.9176	0.379478	0.849979	0.921065	0.655136	2.4416	0.283286	0.61885	2.442
lpg0439, lpg0879, lpg2874	3	6	0	0	0	0	0	5	0	0	1	0	0	0	0	0	1	1	3	1		1	1	1	1	1	6	1	1	2	1	1	1	1	1	2	2	4	2		0.9176	0.379478	0.849979	0.921065	0.655136	2.4416	0.283286	0.61885	0.976801
lpg0439, lpg0879, lpg2888	3	1	0	0	0	0	0	0	0	0	1	0	0	0	0	0	0	0	0	0		1	1	1	1	1	1	1	1	2	1	1	1	1	1	1	1	1	1		0.9176	0.379478	0.849979	0.921065	0.655136	0.406934	0.283286	0.61885	0.976801
lpg0439, lpg0963	2	3	0	0	0	0	0	0	1	1	2	0	0	0	0	0	0	0	0	0		1	1	1	1	1	1	2	2	3	1	1	1	1	1	1	1	1	1		0.9176	0.379478	0.849979	0.921065	0.655136	0.406934	0.566572	1.2377	1.4652
lpg0439, lpg0963, lpg1527	3	2	0	0	0	0	0	1	1	0	0	0	0	0	0	0	0	0	0	0		1	1	1	1	1	2	2	1	1	1	1	1	1	1	1	1	1	1		0.9176	0.379478	0.849979	0.921065	0.655136	0.813868	0.566572	0.61885	0.4884
lpg0439, lpg0963, lpg1527, lpg1701	4	6	0	0	0	0	0	1	6	0	4	5	0	0	0	0	0	5	0	1		1	1	1	1	1	2	7	1	5	6	1	1	1	1	1	6	1	2		0.9176	0.379478	0.849979	0.921065	0.655136	0.813868	1.983	0.61885	2.442
lpg0439, lpg0963, lpg1527, lpg1701, lpg2223	5	9	0	0	0	0	0	10	20	6	5	22	0	0	0	0	6	10	5	13		1	1	1	1	1	11	21	7	6	23	1	1	1	1	7	11	6	14		0.9176	0.379478	0.849979	0.921065	0.655136	4.47628	5.94901	4.33195	2.9304
lpg0439, lpg0963, lpg1527, lpg2223	4	6	0	0	0	0	0	0	2	1	0	2	0	0	0	0	1	2	0	1		1	1	1	1	1	1	3	2	1	3	1	1	1	1	2	3	1	2		0.9176	0.379478	0.849979	0.921065	0.655136	0.406934	0.849858	1.2377	0.4884
lpg0439, lpg0963, lpg1701	3	7	0	0	0	0	0	1	3	1	1	3	0	0	0	0	0	2	0	1		1	1	1	1	1	2	4	2	2	4	1	1	1	1	1	3	1	2		0.9176	0.379478	0.849979	0.921065	0.655136	0.813868	1.13314	1.2377	0.976801
lpg0439, lpg0963, lpg1701, lpg2223	4	8	0	0	0	0	0	4	10	5	3	7	0	0	0	0	3	8	0	2		1	1	1	1	1	5	11	6	4	8	1	1	1	1	4	9	1	3		0.9176	0.379478	0.849979	0.921065	0.655136	2.03467	3.11615	3.7131	1.9536
lpg0439, lpg0963, lpg2223	3	6	0	0	0	0	0	0	2	0	0	1	0	0	0	0	1	1	1	1		1	1	1	1	1	1	3	1	1	2	1	1	1	1	2	2	2	2		0.9176	0.379478	0.849979	0.921065	0.655136	0.406934	0.849858	0.61885	0.4884
lpg0439, lpg0963, lpg2223, lpg2552, lpg2888, lpg3000	6	1	0	0	0	0	0	0	0	0	0	0	0	0	0	1	0	0	0	0		1	1	1	1	1	1	1	1	1	1	1	1	1	2	1	1	1	1		0.9176	0.379478	0.849979	0.921065	0.655136	0.406934	0.283286	0.61885	0.4884
lpg0439, lpg1099	2	10	0	0	0	0	0	4	7	4	2	7	0	0	0	1	1	2	2	2		1	1	1	1	1	5	8	5	3	8	1	1	1	2	2	3	3	3		0.9176	0.379478	0.849979	0.921065	0.655136	2.03467	2.26629	3.09425	1.4652
lpg0439, lpg1099, lpg1621, lpg2584	4	1	0	0	0	0	0	0	0	0	0	1	0	0	0	0	0	0	0	0		1	1	1	1	1	1	1	1	1	2	1	1	1	1	1	1	1	1		0.9176	0.379478	0.849979	0.921065	0.655136	0.406934	0.283286	0.61885	0.4884
lpg0439, lpg1099, lpg2584	3	9	0	0	0	0	0	8	36	15	19	13	0	0	0	0	8	41	9	15		1	1	1	1	1	9	37	16	20	14	1	1	1	1	9	42	10	16		0.9176	0.379478	0.849979	0.921065	0.655136	3.66241	10.4816	9.9016	9.76801
lpg0439, lpg1099, lpg2885	3	4	0	3	0	0	0	0	0	0	0	0	0	1	2	4	0	0	0	0		1	4	1	1	1	1	1	1	1	1	1	2	3	5	1	1	1	1		0.9176	1.51791	0.849979	0.921065	0.655136	0.406934	0.283286	0.61885	0.4884
lpg0439, lpg1525	2	1	0	0	0	0	0	0	0	0	1	0	0	0	0	0	0	0	0	0		1	1	1	1	1	1	1	1	2	1	1	1	1	1	1	1	1	1		0.9176	0.379478	0.849979	0.921065	0.655136	0.406934	0.283286	0.61885	0.976801
lpg0439, lpg1525, lpg1701, lpg2692	4	5	0	0	0	0	0	1	1	0	1	0	0	0	0	0	1	2	0	0		1	1	1	1	1	2	2	1	2	1	1	1	1	1	2	3	1	1		0.9176	0.379478	0.849979	0.921065	0.655136	0.813868	0.566572	0.61885	0.976801
lpg0439, lpg1527	2	5	0	0	0	0	0	1	4	1	0	2	0	0	0	0	0	2	0	0		1	1	1	1	1	2	5	2	1	3	1	1	1	1	1	3	1	1		0.9176	0.379478	0.849979	0.921065	0.655136	0.813868	1.41643	1.2377	0.4884
lpg0439, lpg1527, lpg1701	3	7	0	0	0	0	0	1	2	4	1	2	0	0	0	0	1	0	0	1		1	1	1	1	1	2	3	5	2	3	1	1	1	1	2	1	1	2		0.9176	0.379478	0.849979	0.921065	0.655136	0.813868	0.849858	3.09425	0.976801
lpg0439, lpg1527, lpg1701, lpg2223	4	7	0	0	0	0	0	1	2	1	0	3	0	0	0	0	1	2	0	1		1	1	1	1	1	2	3	2	1	4	1	1	1	1	2	3	1	2		0.9176	0.379478	0.849979	0.921065	0.655136	0.813868	0.849858	1.2377	0.4884
lpg0439, lpg1527, lpg2223	3	4	0	0	0	0	0	0	2	1	1	0	0	0	0	0	0	1	0	0		1	1	1	1	1	1	3	2	2	1	1	1	1	1	1	2	1	1		0.9176	0.379478	0.849979	0.921065	0.655136	0.406934	0.849858	1.2377	0.976801
lpg0439, lpg1621	2	9	0	0	0	0	0	10	39	14	16	29	0	0	0	0	7	21	7	6		1	1	1	1	1	11	40	15	17	30	1	1	1	1	8	22	8	7		0.9176	0.379478	0.849979	0.921065	0.655136	4.47628	11.3314	9.28275	8.30281
lpg0439, lpg1621, lpg1701, lpg1959, lpg2885, lpg2888	6	1	0	0	0	0	0	0	0	0	0	0	0	0	0	0	1	0	0	0		1	1	1	1	1	1	1	1	1	1	1	1	1	1	2	1	1	1		0.9176	0.379478	0.849979	0.921065	0.655136	0.406934	0.283286	0.61885	0.4884
lpg0439, lpg1621, lpg2244	3	1	0	0	0	0	0	0	0	0	1	0	0	0	0	0	0	0	0	0		1	1	1	1	1	1	1	1	2	1	1	1	1	1	1	1	1	1		0.9176	0.379478	0.849979	0.921065	0.655136	0.406934	0.283286	0.61885	0.976801
lpg0439, lpg1621, lpg2584, lpg2628, lpg2885	5	1	0	0	0	0	0	0	0	0	0	0	0	0	0	0	0	0	1	0		1	1	1	1	1	1	1	1	1	1	1	1	1	1	1	1	2	1		0.9176	0.379478	0.849979	0.921065	0.655136	0.406934	0.283286	0.61885	0.4884
lpg0439, lpg1621, lpg2628	3	10	0	0	0	0	0	120	333	156	163	291	0	0	4	0	75	232	61	123		1	1	1	1	1	121	334	157	164	292	1	1	5	1	76	233	62	124		0.9176	0.379478	0.849979	0.921065	0.655136	49.239	94.6176	97.1595	80.0977
lpg0439, lpg1621, lpg2884	3	1	0	1	0	0	0	0	0	0	0	0	0	0	0	0	0	0	0	0		1	2	1	1	1	1	1	1	1	1	1	1	1	1	1	1	1	1		0.9176	0.758956	0.849979	0.921065	0.655136	0.406934	0.283286	0.61885	0.4884
lpg0439, lpg1661	2	8	6	3	0	8	1	0	0	0	0	0	14	30	5	13	0	0	0	0		7	4	1	9	2	1	1	1	1	1	15	31	6	14	1	1	1	1		6.4232	1.51791	0.849979	8.28958	1.31027	0.406934	0.283286	0.61885	0.4884
lpg0439, lpg1661, lpg2552, lpg2692, lpg2874, lpg2885	6	1	0	0	0	0	0	0	0	0	0	0	0	0	0	0	0	0	1	0		1	1	1	1	1	1	1	1	1	1	1	1	1	1	1	1	2	1		0.9176	0.379478	0.849979	0.921065	0.655136	0.406934	0.283286	0.61885	0.4884
lpg0439, lpg1689	2	3	0	0	0	0	0	1	0	0	1	0	0	0	0	0	0	1	0	0		1	1	1	1	1	2	1	1	2	1	1	1	1	1	1	2	1	1		0.9176	0.379478	0.849979	0.921065	0.655136	0.813868	0.283286	0.61885	0.976801
lpg0439, lpg1689, lpg2815	3	3	0	0	0	0	0	1	0	0	0	0	0	0	0	0	0	2	0	1		1	1	1	1	1	2	1	1	1	1	1	1	1	1	1	3	1	2		0.9176	0.379478	0.849979	0.921065	0.655136	0.813868	0.283286	0.61885	0.4884
lpg0439, lpg1689, lpg2815, lpg2874	4	6	0	0	0	0	0	9	0	0	4	0	0	0	0	0	2	6	3	2		1	1	1	1	1	10	1	1	5	1	1	1	1	1	3	7	4	3		0.9176	0.379478	0.849979	0.921065	0.655136	4.06934	0.283286	0.61885	2.442
lpg0439, lpg1689, lpg2874	3	4	0	0	0	0	0	4	0	0	3	0	0	0	0	0	1	4	0	0		1	1	1	1	1	5	1	1	4	1	1	1	1	1	2	5	1	1		0.9176	0.379478	0.849979	0.921065	0.655136	2.03467	0.283286	0.61885	1.9536
lpg0439, lpg1701	2	4	0	0	0	0	0	0	0	0	0	1	0	0	0	0	2	1	0	1		1	1	1	1	1	1	1	1	1	2	1	1	1	1	3	2	1	2		0.9176	0.379478	0.849979	0.921065	0.655136	0.406934	0.283286	0.61885	0.4884
lpg0439, lpg1701, lpg2223	3	5	0	0	0	0	0	1	2	0	1	0	0	0	0	0	0	2	0	1		1	1	1	1	1	2	3	1	2	1	1	1	1	1	1	3	1	2		0.9176	0.379478	0.849979	0.921065	0.655136	0.813868	0.849858	0.61885	0.976801
lpg0439, lpg1701, lpg2692	3	2	0	0	0	0	0	0	1	0	1	0	0	0	0	0	0	0	0	0		1	1	1	1	1	1	2	1	2	1	1	1	1	1	1	1	1	1		0.9176	0.379478	0.849979	0.921065	0.655136	0.406934	0.566572	0.61885	0.976801
lpg0439, lpg1907	2	18	6	15	12	6	8	34	70	34	20	44	5	18	12	41	13	36	14	25		7	16	13	7	9	35	71	35	21	45	6	19	13	42	14	37	15	26		6.4232	6.07165	11.0497	6.44745	5.89623	14.2427	20.1133	21.6598	10.2564
lpg0439, lpg1907, lpg1959	3	2	0	1	0	0	0	0	0	0	0	0	0	0	1	0	0	0	0	0		1	2	1	1	1	1	1	1	1	1	1	1	2	1	1	1	1	1		0.9176	0.758956	0.849979	0.921065	0.655136	0.406934	0.283286	0.61885	0.4884
lpg0439, lpg1907, lpg1959, lpg2584	4	3	0	2	0	1	0	0	0	0	0	0	0	0	0	2	0	0	0	0		1	3	1	2	1	1	1	1	1	1	1	1	1	3	1	1	1	1		0.9176	1.13843	0.849979	1.84213	0.655136	0.406934	0.283286	0.61885	0.4884
lpg0439, lpg1907, lpg2584	3	1	0	0	0	0	0	0	0	0	0	0	0	2	0	0	0	0	0	0		1	1	1	1	1	1	1	1	1	1	1	3	1	1	1	1	1	1		0.9176	0.379478	0.849979	0.921065	0.655136	0.406934	0.283286	0.61885	0.4884
lpg0439, lpg1907, lpg2888	3	2	0	0	0	0	0	2	0	0	1	0	0	0	0	0	0	0	0	0		1	1	1	1	1	3	1	1	2	1	1	1	1	1	1	1	1	1		0.9176	0.379478	0.849979	0.921065	0.655136	1.2208	0.283286	0.61885	0.976801
lpg0439, lpg1959	2	1	0	0	0	0	0	0	0	0	0	0	0	1	0	0	0	0	0	0		1	1	1	1	1	1	1	1	1	1	1	2	1	1	1	1	1	1		0.9176	0.379478	0.849979	0.921065	0.655136	0.406934	0.283286	0.61885	0.4884
lpg0439, lpg1959, lpg2584	3	1	0	1	0	0	0	0	0	0	0	0	0	0	0	0	0	0	0	0		1	2	1	1	1	1	1	1	1	1	1	1	1	1	1	1	1	1		0.9176	0.758956	0.849979	0.921065	0.655136	0.406934	0.283286	0.61885	0.4884
lpg0439, lpg2223	2	3	0	0	0	0	0	0	1	0	0	1	0	0	0	0	0	3	0	0		1	1	1	1	1	1	2	1	1	2	1	1	1	1	1	4	1	1		0.9176	0.379478	0.849979	0.921065	0.655136	0.406934	0.566572	0.61885	0.4884
lpg0439, lpg2223, lpg2815	3	1	0	0	0	0	0	0	0	0	0	0	0	0	1	0	0	0	0	0		1	1	1	1	1	1	1	1	1	1	1	1	2	1	1	1	1	1		0.9176	0.379478	0.849979	0.921065	0.655136	0.406934	0.283286	0.61885	0.4884
lpg0439, lpg2271, lpg2885	3	4	1	1	0	0	1	0	0	0	0	0	0	1	0	0	0	0	0	0		2	2	1	1	2	1	1	1	1	1	1	2	1	1	1	1	1	1		1.8352	0.758956	0.849979	0.921065	1.31027	0.406934	0.283286	0.61885	0.4884
lpg0439, lpg2584	2	9	0	0	0	0	0	4	4	3	2	3	0	0	0	1	0	6	1	3		1	1	1	1	1	5	5	4	3	4	1	1	1	2	1	7	2	4		0.9176	0.379478	0.849979	0.921065	0.655136	2.03467	1.41643	2.4754	1.4652
lpg0439, lpg2628	2	11	0	0	0	0	0	21	30	13	11	25	0	0	10	36	4	20	11	13		1	1	1	1	1	22	31	14	12	26	1	1	11	37	5	21	12	14		0.9176	0.379478	0.849979	0.921065	0.655136	8.95255	8.78187	8.6639	5.86081
lpg0439, lpg2628, lpg2884, lpg3000	4	1	0	0	0	0	0	0	1	0	0	0	0	0	0	0	0	0	0	0		1	1	1	1	1	1	2	1	1	1	1	1	1	1	1	1	1	1		0.9176	0.379478	0.849979	0.921065	0.655136	0.406934	0.566572	0.61885	0.4884
lpg0439, lpg2692	2	6	0	6	2	1	0	0	0	0	0	0	0	1	1	2	0	0	0	0		1	7	3	2	1	1	1	1	1	1	1	2	2	3	1	1	1	1		0.9176	2.65634	2.54994	1.84213	0.655136	0.406934	0.283286	0.61885	0.4884
lpg0439, lpg2806, lpg2815, lpg2874	4	1	0	0	0	0	0	0	0	0	0	0	0	0	0	1	0	0	0	0		1	1	1	1	1	1	1	1	1	1	1	1	1	2	1	1	1	1		0.9176	0.379478	0.849979	0.921065	0.655136	0.406934	0.283286	0.61885	0.4884
lpg0439, lpg2815	2	6	0	0	0	0	0	8	0	0	9	0	0	0	1	0	10	8	4	0		1	1	1	1	1	9	1	1	10	1	1	1	2	1	11	9	5	1		0.9176	0.379478	0.849979	0.921065	0.655136	3.66241	0.283286	0.61885	4.884
lpg0439, lpg2815, lpg2874	3	7	0	0	0	0	0	109	0	0	88	0	0	0	1	0	105	98	54	34		1	1	1	1	1	110	1	1	89	1	1	1	2	1	106	99	55	35		0.9176	0.379478	0.849979	0.921065	0.655136	44.7628	0.283286	0.61885	43.4676
lpg0439, lpg2815, lpg2874, lpg2888	4	1	0	0	0	0	0	0	0	0	0	0	0	0	0	0	1	0	0	0		1	1	1	1	1	1	1	1	1	1	1	1	1	1	2	1	1	1		0.9176	0.379478	0.849979	0.921065	0.655136	0.406934	0.283286	0.61885	0.4884
lpg0439, lpg2874	2	14	0	1	2	0	0	30	1	2	31	8	1	0	1	1	26	26	21	12		1	2	3	1	1	31	2	3	32	9	2	1	2	2	27	27	22	13		0.9176	0.758956	2.54994	0.921065	0.655136	12.615	0.566572	1.85655	15.6288
lpg0439, lpg2884	2	3	1	0	0	0	0	0	0	0	0	0	1	0	1	0	0	0	0	0		2	1	1	1	1	1	1	1	1	1	2	1	2	1	1	1	1	1		1.8352	0.379478	0.849979	0.921065	0.655136	0.406934	0.283286	0.61885	0.4884
lpg0439, lpg2885	2	6	1	1	1	2	0	0	0	0	0	0	0	0	1	1	0	0	0	0		2	2	2	3	1	1	1	1	1	1	1	1	2	2	1	1	1	1		1.8352	0.758956	1.69996	2.76319	0.655136	0.406934	0.283286	0.61885	0.4884
lpg0518	1	18	9	34	16	51	6	89	230	97	72	143	148	342	44	200	36	124	57	87		10	35	17	52	7	90	231	98	73	144	149	343	45	201	37	125	58	88		9.176	13.2817	14.4496	47.8954	4.58595	36.6241	65.4391	60.6473	35.6532
lpg0518, lpg0621	2	14	18	61	23	8	15	2	0	0	1	0	12	42	11	35	4	3	3	0		19	62	24	9	16	3	1	1	2	1	13	43	12	36	5	4	4	1		17.4344	23.5276	20.3995	8.28958	10.4822	1.2208	0.283286	0.61885	0.976801
lpg0518, lpg0621, lpg1621	3	1	0	0	0	0	0	0	0	0	0	0	0	0	0	0	0	0	0	1		1	1	1	1	1	1	1	1	1	1	1	1	1	1	1	1	1	2		0.9176	0.379478	0.849979	0.921065	0.655136	0.406934	0.283286	0.61885	0.4884
lpg0518, lpg0621, lpg2815	3	6	0	0	0	0	0	3	0	0	1	0	0	0	0	0	6	8	3	8		1	1	1	1	1	4	1	1	2	1	1	1	1	1	7	9	4	9		0.9176	0.379478	0.849979	0.921065	0.655136	1.62774	0.283286	0.61885	0.976801
lpg0518, lpg0716, lpg0963, lpg1701, lpg2552	5	1	0	0	0	0	0	0	0	1	0	0	0	0	0	0	0	0	0	0		1	1	1	1	1	1	1	2	1	1	1	1	1	1	1	1	1	1		0.9176	0.379478	0.849979	0.921065	0.655136	0.406934	0.283286	1.2377	0.4884
lpg0518, lpg0879	2	3	0	0	0	0	0	1	0	1	0	0	0	0	0	0	0	0	0	2		1	1	1	1	1	2	1	2	1	1	1	1	1	1	1	1	1	3		0.9176	0.379478	0.849979	0.921065	0.655136	0.813868	0.283286	1.2377	0.4884
lpg0518, lpg0879, lpg1099, lpg1148, lpg1525, lpg1702, lpg2223	7	4	0	0	0	0	0	0	0	2	1	0	0	0	0	0	0	1	0	1		1	1	1	1	1	1	1	3	2	1	1	1	1	1	1	2	1	2		0.9176	0.379478	0.849979	0.921065	0.655136	0.406934	0.283286	1.85655	0.976801
lpg0518, lpg0879, lpg1099, lpg1148, lpg1525, lpg1702, lpg2223, lpg2552	8	6	0	0	0	0	0	2	2	3	0	2	0	0	0	0	0	5	0	3		1	1	1	1	1	3	3	4	1	3	1	1	1	1	1	6	1	4		0.9176	0.379478	0.849979	0.921065	0.655136	1.2208	0.849858	2.4754	0.4884
lpg0518, lpg0879, lpg1099, lpg1148, lpg1525, lpg1702, lpg2552	7	2	0	0	0	0	0	0	0	1	1	0	0	0	0	0	0	0	0	0		1	1	1	1	1	1	1	2	2	1	1	1	1	1	1	1	1	1		0.9176	0.379478	0.849979	0.921065	0.655136	0.406934	0.283286	1.2377	0.976801
lpg0518, lpg0879, lpg1099, lpg1148, lpg1525, lpg2223, lpg2552	7	1	0	0	0	0	0	0	0	0	0	0	0	0	0	0	1	0	0	0		1	1	1	1	1	1	1	1	1	1	1	1	1	1	2	1	1	1		0.9176	0.379478	0.849979	0.921065	0.655136	0.406934	0.283286	0.61885	0.4884
lpg0518, lpg0879, lpg1099, lpg1148, lpg1702, lpg2223, lpg2552	7	4	0	0	0	0	0	0	1	2	1	0	0	0	0	0	0	1	0	0		1	1	1	1	1	1	2	3	2	1	1	1	1	1	1	2	1	1		0.9176	0.379478	0.849979	0.921065	0.655136	0.406934	0.566572	1.85655	0.976801
lpg0518, lpg0879, lpg1099, lpg1148, lpg1702, lpg2552	6	2	0	0	0	0	0	1	0	0	0	1	0	0	0	0	0	0	0	0		1	1	1	1	1	2	1	1	1	2	1	1	1	1	1	1	1	1		0.9176	0.379478	0.849979	0.921065	0.655136	0.813868	0.283286	0.61885	0.4884
lpg0518, lpg0879, lpg1099, lpg1148, lpg2223, lpg2552	6	1	0	0	0	0	0	0	1	0	0	0	0	0	0	0	0	0	0	0		1	1	1	1	1	1	2	1	1	1	1	1	1	1	1	1	1	1		0.9176	0.379478	0.849979	0.921065	0.655136	0.406934	0.566572	0.61885	0.4884
lpg0518, lpg0879, lpg1099, lpg1621, lpg1701, lpg1702, lpg1959, lpg2223, lpg2552, lpg2885, lpg2888	11	1	0	0	0	0	0	0	0	0	0	0	0	0	0	0	1	0	0	0		1	1	1	1	1	1	1	1	1	1	1	1	1	1	2	1	1	1		0.9176	0.379478	0.849979	0.921065	0.655136	0.406934	0.283286	0.61885	0.4884
lpg0518, lpg0879, lpg1099, lpg2223, lpg2552	5	1	0	0	0	0	0	0	1	0	0	0	0	0	0	0	0	0	0	0		1	1	1	1	1	1	2	1	1	1	1	1	1	1	1	1	1	1		0.9176	0.379478	0.849979	0.921065	0.655136	0.406934	0.566572	0.61885	0.4884
lpg0518, lpg0879, lpg1148, lpg1525, lpg1702, lpg2223	6	1	0	0	0	0	0	0	0	0	0	0	0	0	0	0	0	0	0	1		1	1	1	1	1	1	1	1	1	1	1	1	1	1	1	1	1	2		0.9176	0.379478	0.849979	0.921065	0.655136	0.406934	0.283286	0.61885	0.4884
lpg0518, lpg0879, lpg1148, lpg1525, lpg1702, lpg2223, lpg2552	7	5	0	0	0	0	0	0	2	1	0	0	0	0	0	0	1	1	0	1		1	1	1	1	1	1	3	2	1	1	1	1	1	1	2	2	1	2		0.9176	0.379478	0.849979	0.921065	0.655136	0.406934	0.849858	1.2377	0.4884
lpg0518, lpg0879, lpg1148, lpg1525, lpg2223, lpg2552	6	1	0	0	0	0	0	0	1	0	0	0	0	0	0	0	0	0	0	0		1	1	1	1	1	1	2	1	1	1	1	1	1	1	1	1	1	1		0.9176	0.379478	0.849979	0.921065	0.655136	0.406934	0.566572	0.61885	0.4884
lpg0518, lpg0879, lpg1148, lpg1702, lpg1776, lpg2244, lpg2692	7	1	0	0	0	0	0	0	0	0	0	0	0	0	0	0	0	1	0	0		1	1	1	1	1	1	1	1	1	1	1	1	1	1	1	2	1	1		0.9176	0.379478	0.849979	0.921065	0.655136	0.406934	0.283286	0.61885	0.4884
lpg0518, lpg0879, lpg1148, lpg1702, lpg1776, lpg2244, lpg2692, lpg2806	8	1	0	0	0	0	0	0	0	0	0	0	0	0	0	0	0	1	0	0		1	1	1	1	1	1	1	1	1	1	1	1	1	1	1	2	1	1		0.9176	0.379478	0.849979	0.921065	0.655136	0.406934	0.283286	0.61885	0.4884
lpg0518, lpg0879, lpg1148, lpg1702, lpg1776, lpg2244, lpg2692, lpg2806, lpg2815	9	4	0	0	0	0	0	1	0	0	3	0	0	0	0	0	2	1	0	0		1	1	1	1	1	2	1	1	4	1	1	1	1	1	3	2	1	1		0.9176	0.379478	0.849979	0.921065	0.655136	0.813868	0.283286	0.61885	1.9536
lpg0518, lpg0879, lpg1148, lpg1702, lpg1776, lpg2244, lpg2692, lpg2815	8	2	0	0	0	0	0	0	0	0	0	0	0	0	0	0	1	1	0	0		1	1	1	1	1	1	1	1	1	1	1	1	1	1	2	2	1	1		0.9176	0.379478	0.849979	0.921065	0.655136	0.406934	0.283286	0.61885	0.4884
lpg0518, lpg0879, lpg1148, lpg1702, lpg1776, lpg2692	6	1	0	0	0	0	0	1	0	0	0	0	0	0	0	0	0	0	0	0		1	1	1	1	1	2	1	1	1	1	1	1	1	1	1	1	1	1		0.9176	0.379478	0.849979	0.921065	0.655136	0.813868	0.283286	0.61885	0.4884
lpg0518, lpg0879, lpg1148, lpg1702, lpg1776, lpg2692, lpg2806, lpg2815	8	1	0	0	0	0	0	0	0	0	1	0	0	0	0	0	0	0	0	0		1	1	1	1	1	1	1	1	2	1	1	1	1	1	1	1	1	1		0.9176	0.379478	0.849979	0.921065	0.655136	0.406934	0.283286	0.61885	0.976801
lpg0518, lpg0879, lpg1148, lpg1702, lpg2244, lpg2692, lpg2806, lpg2815	8	1	0	0	0	0	0	1	0	0	0	0	0	0	0	0	0	0	0	0		1	1	1	1	1	2	1	1	1	1	1	1	1	1	1	1	1	1		0.9176	0.379478	0.849979	0.921065	0.655136	0.813868	0.283286	0.61885	0.4884
lpg0518, lpg0879, lpg1148, lpg1776	4	1	0	0	0	0	0	0	0	0	1	0	0	0	0	0	0	0	0	0		1	1	1	1	1	1	1	1	2	1	1	1	1	1	1	1	1	1		0.9176	0.379478	0.849979	0.921065	0.655136	0.406934	0.283286	0.61885	0.976801
lpg0518, lpg0879, lpg1148, lpg1776, lpg2692, lpg2806	6	1	0	0	0	0	0	0	0	0	0	0	0	0	0	0	0	1	0	0		1	1	1	1	1	1	1	1	1	1	1	1	1	1	1	2	1	1		0.9176	0.379478	0.849979	0.921065	0.655136	0.406934	0.283286	0.61885	0.4884
lpg0518, lpg0879, lpg1148, lpg2244, lpg2806	5	1	0	0	0	0	0	0	0	0	1	0	0	0	0	0	0	0	0	0		1	1	1	1	1	1	1	1	2	1	1	1	1	1	1	1	1	1		0.9176	0.379478	0.849979	0.921065	0.655136	0.406934	0.283286	0.61885	0.976801
lpg0518, lpg0879, lpg1525, lpg2223, lpg2552	5	1	0	0	0	0	0	0	1	0	0	0	0	0	0	0	0	0	0	0		1	1	1	1	1	1	2	1	1	1	1	1	1	1	1	1	1	1		0.9176	0.379478	0.849979	0.921065	0.655136	0.406934	0.566572	0.61885	0.4884
lpg0518, lpg0879, lpg1661	3	5	0	0	0	0	0	0	1	2	0	1	0	0	0	0	1	0	0	1		1	1	1	1	1	1	2	3	1	2	1	1	1	1	2	1	1	2		0.9176	0.379478	0.849979	0.921065	0.655136	0.406934	0.566572	1.85655	0.4884
lpg0518, lpg0879, lpg1661, lpg1701	4	9	0	0	0	0	0	11	22	9	3	5	0	0	0	0	7	14	2	3		1	1	1	1	1	12	23	10	4	6	1	1	1	1	8	15	3	4		0.9176	0.379478	0.849979	0.921065	0.655136	4.88321	6.51558	6.1885	1.9536
lpg0518, lpg0879, lpg1661, lpg1701, lpg2733	5	9	0	0	0	0	0	13	39	27	10	17	0	0	0	0	10	24	11	10		1	1	1	1	1	14	40	28	11	18	1	1	1	1	11	25	12	11		0.9176	0.379478	0.849979	0.921065	0.655136	5.69708	11.3314	17.3278	5.37241
lpg0518, lpg0879, lpg1661, lpg2733	4	5	0	0	0	0	0	0	0	1	0	1	0	0	0	0	2	2	2	0		1	1	1	1	1	1	1	2	1	2	1	1	1	1	3	3	3	1		0.9176	0.379478	0.849979	0.921065	0.655136	0.406934	0.283286	1.2377	0.4884
lpg0518, lpg0879, lpg1701	3	7	0	0	0	0	0	2	2	1	0	2	0	0	0	0	0	1	1	1		1	1	1	1	1	3	3	2	1	3	1	1	1	1	1	2	2	2		0.9176	0.379478	0.849979	0.921065	0.655136	1.2208	0.849858	1.2377	0.4884
lpg0518, lpg0879, lpg1701, lpg2733	4	9	0	0	0	0	0	4	14	3	2	1	0	0	0	0	4	4	2	3		1	1	1	1	1	5	15	4	3	2	1	1	1	1	5	5	3	4		0.9176	0.379478	0.849979	0.921065	0.655136	2.03467	4.24929	2.4754	1.4652
lpg0518, lpg0879, lpg1702, lpg1776, lpg2806, lpg2815	6	1	0	0	0	0	0	0	0	0	0	0	0	0	0	0	0	0	0	1		1	1	1	1	1	1	1	1	1	1	1	1	1	1	1	1	1	2		0.9176	0.379478	0.849979	0.921065	0.655136	0.406934	0.283286	0.61885	0.4884
lpg0518, lpg0879, lpg1776, lpg2692, lpg2806, lpg2815	6	1	0	0	0	0	0	1	0	0	0	0	0	0	0	0	0	0	0	0		1	1	1	1	1	2	1	1	1	1	1	1	1	1	1	1	1	1		0.9176	0.379478	0.849979	0.921065	0.655136	0.813868	0.283286	0.61885	0.4884
lpg0518, lpg0879, lpg2733	3	2	0	0	0	0	0	1	0	0	0	0	0	0	0	0	0	1	0	0		1	1	1	1	1	2	1	1	1	1	1	1	1	1	1	2	1	1		0.9176	0.379478	0.849979	0.921065	0.655136	0.813868	0.283286	0.61885	0.4884
lpg0518, lpg0879, lpg2888	3	1	0	0	0	0	0	0	2	0	0	0	0	0	0	0	0	0	0	0		1	1	1	1	1	1	3	1	1	1	1	1	1	1	1	1	1	1		0.9176	0.379478	0.849979	0.921065	0.655136	0.406934	0.849858	0.61885	0.4884
lpg0518, lpg0963	2	1	0	0	0	0	0	0	1	0	0	0	0	0	0	0	0	0	0	0		1	1	1	1	1	1	2	1	1	1	1	1	1	1	1	1	1	1		0.9176	0.379478	0.849979	0.921065	0.655136	0.406934	0.566572	0.61885	0.4884
lpg0518, lpg0963, lpg1525, lpg1527, lpg1701, lpg2223	6	1	0	0	0	0	0	0	1	0	0	0	0	0	0	0	0	0	0	0		1	1	1	1	1	1	2	1	1	1	1	1	1	1	1	1	1	1		0.9176	0.379478	0.849979	0.921065	0.655136	0.406934	0.566572	0.61885	0.4884
lpg0518, lpg0963, lpg1527	3	3	0	0	0	0	0	0	0	1	0	0	0	0	0	0	0	1	0	1		1	1	1	1	1	1	1	2	1	1	1	1	1	1	1	2	1	2		0.9176	0.379478	0.849979	0.921065	0.655136	0.406934	0.283286	1.2377	0.4884
lpg0518, lpg0963, lpg1527, lpg1701	4	6	0	0	0	0	0	0	10	4	0	3	0	0	0	0	3	3	0	6		1	1	1	1	1	1	11	5	1	4	1	1	1	1	4	4	1	7		0.9176	0.379478	0.849979	0.921065	0.655136	0.406934	3.11615	3.09425	0.4884
lpg0518, lpg0963, lpg1527, lpg1701, lpg2223	5	9	0	0	0	0	0	14	56	23	19	31	0	0	0	0	14	27	6	19		1	1	1	1	1	15	57	24	20	32	1	1	1	1	15	28	7	20		0.9176	0.379478	0.849979	0.921065	0.655136	6.10401	16.1473	14.8524	9.76801
lpg0518, lpg0963, lpg1527, lpg1701, lpg2804	5	1	0	0	0	0	0	0	0	0	1	0	0	0	0	0	0	0	0	0		1	1	1	1	1	1	1	1	2	1	1	1	1	1	1	1	1	1		0.9176	0.379478	0.849979	0.921065	0.655136	0.406934	0.283286	0.61885	0.976801
lpg0518, lpg0963, lpg1527, lpg2223	4	7	0	0	0	0	0	0	7	3	0	3	0	0	0	0	3	2	2	1		1	1	1	1	1	1	8	4	1	4	1	1	1	1	4	3	3	2		0.9176	0.379478	0.849979	0.921065	0.655136	0.406934	2.26629	2.4754	0.4884
lpg0518, lpg0963, lpg1701	3	7	0	0	0	0	0	0	2	2	1	2	0	0	0	0	0	1	1	2		1	1	1	1	1	1	3	3	2	3	1	1	1	1	1	2	2	3		0.9176	0.379478	0.849979	0.921065	0.655136	0.406934	0.849858	1.85655	0.976801
lpg0518, lpg0963, lpg1701, lpg2223	4	9	0	0	0	0	0	7	20	8	5	17	0	0	0	0	2	8	2	4		1	1	1	1	1	8	21	9	6	18	1	1	1	1	3	9	3	5		0.9176	0.379478	0.849979	0.921065	0.655136	3.25547	5.94901	5.56965	2.9304
lpg0518, lpg0963, lpg2223	3	2	0	0	0	0	0	1	0	0	0	0	0	0	0	0	1	0	0	0		1	1	1	1	1	2	1	1	1	1	1	1	1	1	2	1	1	1		0.9176	0.379478	0.849979	0.921065	0.655136	0.813868	0.283286	0.61885	0.4884
lpg0518, lpg0963, lpg2223, lpg2884, lpg2888, lpg3000	6	1	0	0	0	0	0	0	0	0	0	0	1	0	0	0	0	0	0	0		1	1	1	1	1	1	1	1	1	1	2	1	1	1	1	1	1	1		0.9176	0.379478	0.849979	0.921065	0.655136	0.406934	0.283286	0.61885	0.4884
lpg0518, lpg0963, lpg2552, lpg3000	4	1	0	0	0	0	0	0	0	0	0	0	0	0	0	0	0	0	1	0		1	1	1	1	1	1	1	1	1	1	1	1	1	1	1	1	2	1		0.9176	0.379478	0.849979	0.921065	0.655136	0.406934	0.283286	0.61885	0.4884
lpg0518, lpg0963, lpg2888, lpg3000	4	1	0	0	0	1	0	0	0	0	0	0	0	0	0	0	0	0	0	0		1	1	1	2	1	1	1	1	1	1	1	1	1	1	1	1	1	1		0.9176	0.379478	0.849979	1.84213	0.655136	0.406934	0.283286	0.61885	0.4884
lpg0518, lpg1099	2	1	0	0	0	0	0	0	0	0	0	0	0	0	0	0	0	1	0	0		1	1	1	1	1	1	1	1	1	1	1	1	1	1	1	2	1	1		0.9176	0.379478	0.849979	0.921065	0.655136	0.406934	0.283286	0.61885	0.4884
lpg0518, lpg1099, lpg1148, lpg1525, lpg1702, lpg2223, lpg2552	7	1	0	0	0	0	0	0	0	0	0	0	0	0	0	0	0	1	0	0		1	1	1	1	1	1	1	1	1	1	1	1	1	1	1	2	1	1		0.9176	0.379478	0.849979	0.921065	0.655136	0.406934	0.283286	0.61885	0.4884
lpg0518, lpg1099, lpg1148, lpg1702	4	1	0	0	0	0	0	0	1	0	0	0	0	0	0	0	0	0	0	0		1	1	1	1	1	1	2	1	1	1	1	1	1	1	1	1	1	1		0.9176	0.379478	0.849979	0.921065	0.655136	0.406934	0.566572	0.61885	0.4884
lpg0518, lpg1099, lpg1525, lpg1702, lpg2223	5	1	0	0	0	0	0	0	0	1	0	0	0	0	0	0	0	0	0	0		1	1	1	1	1	1	1	2	1	1	1	1	1	1	1	1	1	1		0.9176	0.379478	0.849979	0.921065	0.655136	0.406934	0.283286	1.2377	0.4884
lpg0518, lpg1099, lpg1702	3	3	0	0	0	0	0	0	1	0	1	0	0	0	0	0	0	0	1	0		1	1	1	1	1	1	2	1	2	1	1	1	1	1	1	1	2	1		0.9176	0.379478	0.849979	0.921065	0.655136	0.406934	0.566572	0.61885	0.976801
lpg0518, lpg1099, lpg1702, lpg2223, lpg2552	5	1	0	0	0	0	0	0	0	0	1	0	0	0	0	0	0	0	0	0		1	1	1	1	1	1	1	1	2	1	1	1	1	1	1	1	1	1		0.9176	0.379478	0.849979	0.921065	0.655136	0.406934	0.283286	0.61885	0.976801
lpg0518, lpg1099, lpg1702, lpg2733	4	3	0	0	0	0	0	0	6	0	0	0	0	0	0	0	0	2	0	3		1	1	1	1	1	1	7	1	1	1	1	1	1	1	1	3	1	4		0.9176	0.379478	0.849979	0.921065	0.655136	0.406934	1.983	0.61885	0.4884
lpg0518, lpg1099, lpg1702, lpg2733, lpg2885	5	9	0	0	0	0	0	13	15	3	5	21	0	0	0	0	1	10	4	7		1	1	1	1	1	14	16	4	6	22	1	1	1	1	2	11	5	8		0.9176	0.379478	0.849979	0.921065	0.655136	5.69708	4.53258	2.4754	2.9304
lpg0518, lpg1099, lpg1702, lpg2885	4	9	0	0	0	0	0	2	8	2	3	3	0	0	0	0	3	5	2	3		1	1	1	1	1	3	9	3	4	4	1	1	1	1	4	6	3	4		0.9176	0.379478	0.849979	0.921065	0.655136	1.2208	2.54958	1.85655	1.9536
lpg0518, lpg1099, lpg2733	3	1	0	0	0	0	0	0	0	0	0	0	0	0	0	0	0	1	0	0		1	1	1	1	1	1	1	1	1	1	1	1	1	1	1	2	1	1		0.9176	0.379478	0.849979	0.921065	0.655136	0.406934	0.283286	0.61885	0.4884
lpg0518, lpg1099, lpg2733, lpg2885	4	5	0	0	0	0	0	0	2	1	2	0	0	0	0	0	0	2	0	3		1	1	1	1	1	1	3	2	3	1	1	1	1	1	1	3	1	4		0.9176	0.379478	0.849979	0.921065	0.655136	0.406934	0.849858	1.2377	1.4652
lpg0518, lpg1099, lpg2885	3	3	0	0	0	0	0	0	2	1	0	0	0	0	0	0	0	0	1	0		1	1	1	1	1	1	3	2	1	1	1	1	1	1	1	1	2	1		0.9176	0.379478	0.849979	0.921065	0.655136	0.406934	0.849858	1.2377	0.4884
lpg0518, lpg1137	2	9	0	0	0	0	0	23	57	22	12	30	0	0	0	0	8	26	6	21		1	1	1	1	1	24	58	23	13	31	1	1	1	1	9	27	7	22		0.9176	0.379478	0.849979	0.921065	0.655136	9.76642	16.4306	14.2336	6.34921
lpg0518, lpg1137, lpg2692, lpg2884	4	1	0	0	0	0	0	0	0	0	0	0	0	0	0	0	0	1	0	0		1	1	1	1	1	1	1	1	1	1	1	1	1	1	1	2	1	1		0.9176	0.379478	0.849979	0.921065	0.655136	0.406934	0.283286	0.61885	0.4884
lpg0518, lpg1137, lpg2884	3	9	0	0	0	0	0	28	52	19	20	34	0	0	0	0	15	36	15	23		1	1	1	1	1	29	53	20	21	35	1	1	1	1	16	37	16	24		0.9176	0.379478	0.849979	0.921065	0.655136	11.8011	15.0142	12.377	10.2564
lpg0518, lpg1137, lpg3000	3	9	0	0	0	0	0	6	21	13	4	6	0	0	0	0	5	6	5	10		1	1	1	1	1	7	22	14	5	7	1	1	1	1	6	7	6	11		0.9176	0.379478	0.849979	0.921065	0.655136	2.84854	6.23229	8.6639	2.442
lpg0518, lpg1148	2	9	0	0	0	0	0	12	3	1	8	7	0	0	0	0	4	10	4	11		1	1	1	1	1	13	4	2	9	8	1	1	1	1	5	11	5	12		0.9176	0.379478	0.849979	0.921065	0.655136	5.29014	1.13314	1.2377	4.3956
lpg0518, lpg1148, lpg1702, lpg1776	4	1	0	0	0	0	0	0	0	0	1	0	0	0	0	0	0	0	0	0		1	1	1	1	1	1	1	1	2	1	1	1	1	1	1	1	1	1		0.9176	0.379478	0.849979	0.921065	0.655136	0.406934	0.283286	0.61885	0.976801
lpg0518, lpg1148, lpg1702, lpg2223, lpg2552	5	1	0	0	0	0	0	0	0	0	0	0	0	0	0	0	0	0	0	1		1	1	1	1	1	1	1	1	1	1	1	1	1	1	1	1	1	2		0.9176	0.379478	0.849979	0.921065	0.655136	0.406934	0.283286	0.61885	0.4884
lpg0518, lpg1148, lpg2888	3	10	0	0	0	0	0	89	67	20	88	52	0	0	1	0	36	79	50	72		1	1	1	1	1	90	68	21	89	53	1	1	2	1	37	80	51	73		0.9176	0.379478	0.849979	0.921065	0.655136	36.6241	19.2635	12.9959	43.4676
lpg0518, lpg1525	2	9	0	0	0	0	0	13	30	16	14	18	0	0	0	0	11	37	5	26		1	1	1	1	1	14	31	17	15	19	1	1	1	1	12	38	6	27		0.9176	0.379478	0.849979	0.921065	0.655136	5.69708	8.78187	10.5205	7.32601
lpg0518, lpg1525, lpg1527, lpg1701, lpg2223	5	1	0	0	0	0	0	0	0	0	0	0	0	0	0	0	0	0	0	1		1	1	1	1	1	1	1	1	1	1	1	1	1	1	1	1	1	2		0.9176	0.379478	0.849979	0.921065	0.655136	0.406934	0.283286	0.61885	0.4884
lpg0518, lpg1527	2	2	0	0	0	0	0	1	2	0	0	0	0	0	0	0	0	0	0	0		1	1	1	1	1	2	3	1	1	1	1	1	1	1	1	1	1	1		0.9176	0.379478	0.849979	0.921065	0.655136	0.813868	0.849858	0.61885	0.4884
lpg0518, lpg1527, lpg1701	3	6	0	0	0	0	0	1	3	0	1	2	0	0	0	0	0	1	0	1		1	1	1	1	1	2	4	1	2	3	1	1	1	1	1	2	1	2		0.9176	0.379478	0.849979	0.921065	0.655136	0.813868	1.13314	0.61885	0.976801
lpg0518, lpg1527, lpg1701, lpg2223	4	7	0	0	0	0	0	4	13	4	6	3	0	0	0	0	1	7	0	0		1	1	1	1	1	5	14	5	7	4	1	1	1	1	2	8	1	1		0.9176	0.379478	0.849979	0.921065	0.655136	2.03467	3.96601	3.09425	3.4188
lpg0518, lpg1527, lpg2223	3	4	0	0	0	0	0	0	0	2	0	4	0	0	0	0	0	2	3	0		1	1	1	1	1	1	1	3	1	5	1	1	1	1	1	3	4	1		0.9176	0.379478	0.849979	0.921065	0.655136	0.406934	0.283286	1.85655	0.4884
lpg0518, lpg1527, lpg2884	3	9	4	8	3	3	5	0	0	0	0	0	2	3	3	19	0	0	0	0		5	9	4	4	6	1	1	1	1	1	3	4	4	20	1	1	1	1		4.588	3.4153	3.39992	3.68426	3.93082	0.406934	0.283286	0.61885	0.4884
lpg0518, lpg1621	2	7	0	0	0	0	0	47	141	60	74	0	0	0	0	0	29	104	0	57		1	1	1	1	1	48	142	61	75	1	1	1	1	1	30	105	1	58		0.9176	0.379478	0.849979	0.921065	0.655136	19.5328	40.2266	37.7499	36.63
lpg0518, lpg1621, lpg1701	3	1	0	0	0	0	0	0	1	0	0	0	0	0	0	0	0	0	0	0		1	1	1	1	1	1	2	1	1	1	1	1	1	1	1	1	1	1		0.9176	0.379478	0.849979	0.921065	0.655136	0.406934	0.566572	0.61885	0.4884
lpg0518, lpg1621, lpg2552	3	1	0	0	0	0	0	0	0	0	1	0	0	0	0	0	0	0	0	0		1	1	1	1	1	1	1	1	2	1	1	1	1	1	1	1	1	1		0.9176	0.379478	0.849979	0.921065	0.655136	0.406934	0.283286	0.61885	0.976801
lpg0518, lpg1661	2	8	0	0	0	0	0	3	10	2	2	13	0	0	0	0	2	8	2	0		1	1	1	1	1	4	11	3	3	14	1	1	1	1	3	9	3	1		0.9176	0.379478	0.849979	0.921065	0.655136	1.62774	3.11615	1.85655	1.4652
lpg0518, lpg1661, lpg1701	3	6	0	0	0	0	0	1	1	2	0	0	0	0	0	0	1	3	1	0		1	1	1	1	1	2	2	3	1	1	1	1	1	1	2	4	2	1		0.9176	0.379478	0.849979	0.921065	0.655136	0.813868	0.566572	1.85655	0.4884
lpg0518, lpg1661, lpg1701, lpg2733	4	4	0	0	0	0	0	1	0	0	0	0	0	0	0	0	1	2	1	0		1	1	1	1	1	2	1	1	1	1	1	1	1	1	2	3	2	1		0.9176	0.379478	0.849979	0.921065	0.655136	0.813868	0.283286	0.61885	0.4884
lpg0518, lpg1661, lpg2733	3	1	0	0	0	0	0	0	0	0	0	0	0	0	0	0	1	0	0	0		1	1	1	1	1	1	1	1	1	1	1	1	1	1	2	1	1	1		0.9176	0.379478	0.849979	0.921065	0.655136	0.406934	0.283286	0.61885	0.4884
lpg0518, lpg1661, lpg2874	3	4	0	0	0	0	2	0	0	0	0	0	1	0	1	3	0	0	0	0		1	1	1	1	3	1	1	1	1	1	2	1	2	4	1	1	1	1		0.9176	0.379478	0.849979	0.921065	1.96541	0.406934	0.283286	0.61885	0.4884
lpg0518, lpg1689, lpg2692	3	1	0	0	0	0	0	0	1	0	0	0	0	0	0	0	0	0	0	0		1	1	1	1	1	1	2	1	1	1	1	1	1	1	1	1	1	1		0.9176	0.379478	0.849979	0.921065	0.655136	0.406934	0.566572	0.61885	0.4884
lpg0518, lpg1689, lpg2804, lpg2815, lpg2884	5	1	0	0	0	0	0	0	0	0	0	0	0	0	0	1	0	0	0	0		1	1	1	1	1	1	1	1	1	1	1	1	1	2	1	1	1	1		0.9176	0.379478	0.849979	0.921065	0.655136	0.406934	0.283286	0.61885	0.4884
lpg0518, lpg1701	2	9	0	0	0	0	0	24	76	65	25	57	0	0	0	0	22	39	17	34		1	1	1	1	1	25	77	66	26	58	1	1	1	1	23	40	18	35		0.9176	0.379478	0.849979	0.921065	0.655136	10.1734	21.813	40.8441	12.6984
lpg0518, lpg1701, lpg2223	3	9	0	0	0	0	0	2	6	4	2	3	0	0	0	0	2	4	2	3		1	1	1	1	1	3	7	5	3	4	1	1	1	1	3	5	3	4		0.9176	0.379478	0.849979	0.921065	0.655136	1.2208	1.983	3.09425	1.4652
lpg0518, lpg1701, lpg2733	3	2	0	0	0	0	0	0	1	1	0	0	0	0	0	0	0	0	0	0		1	1	1	1	1	1	2	2	1	1	1	1	1	1	1	1	1	1		0.9176	0.379478	0.849979	0.921065	0.655136	0.406934	0.566572	1.2377	0.4884
lpg0518, lpg1702, lpg2733	3	2	0	0	0	0	0	0	3	0	0	0	0	0	0	0	0	0	1	0		1	1	1	1	1	1	4	1	1	1	1	1	1	1	1	1	2	1		0.9176	0.379478	0.849979	0.921065	0.655136	0.406934	1.13314	0.61885	0.4884
lpg0518, lpg1702, lpg2733, lpg2885	4	5	0	0	0	0	0	3	3	0	0	4	0	0	0	0	1	2	0	0		1	1	1	1	1	4	4	1	1	5	1	1	1	1	2	3	1	1		0.9176	0.379478	0.849979	0.921065	0.655136	1.62774	1.13314	0.61885	0.4884
lpg0518, lpg1702, lpg2885	3	3	0	0	0	0	0	1	0	2	0	0	0	0	0	0	0	0	1	0		1	1	1	1	1	2	1	3	1	1	1	1	1	1	1	1	2	1		0.9176	0.379478	0.849979	0.921065	0.655136	0.813868	0.283286	1.85655	0.4884
lpg0518, lpg1959	2	4	2	0	0	1	0	0	0	0	0	0	0	2	1	0	0	0	0	0		3	1	1	2	1	1	1	1	1	1	1	3	2	1	1	1	1	1		2.7528	0.379478	0.849979	1.84213	0.655136	0.406934	0.283286	0.61885	0.4884
lpg0518, lpg1959, lpg2733	3	7	0	1	1	2	0	0	0	0	0	0	1	5	5	9	0	0	0	0		1	2	2	3	1	1	1	1	1	1	2	6	6	10	1	1	1	1		0.9176	0.758956	1.69996	2.76319	0.655136	0.406934	0.283286	0.61885	0.4884
lpg0518, lpg1959, lpg2733, lpg2815	4	7	10	1	0	12	0	0	0	0	0	0	4	10	8	25	0	0	0	0		11	2	1	13	1	1	1	1	1	1	5	11	9	26	1	1	1	1		10.0936	0.758956	0.849979	11.9738	0.655136	0.406934	0.283286	0.61885	0.4884
lpg0518, lpg1959, lpg2815	3	7	5	1	0	1	0	0	0	0	0	0	5	4	4	10	0	0	0	0		6	2	1	2	1	1	1	1	1	1	6	5	5	11	1	1	1	1		5.5056	0.758956	0.849979	1.84213	0.655136	0.406934	0.283286	0.61885	0.4884
lpg0518, lpg2223	2	4	0	0	0	0	0	1	2	0	0	0	0	0	0	0	0	0	1	1		1	1	1	1	1	2	3	1	1	1	1	1	1	1	1	1	2	2		0.9176	0.379478	0.849979	0.921065	0.655136	0.813868	0.849858	0.61885	0.4884
lpg0518, lpg2552	2	6	0	0	0	0	0	2	6	3	0	1	0	0	0	0	0	1	0	1		1	1	1	1	1	3	7	4	1	2	1	1	1	1	1	2	1	2		0.9176	0.379478	0.849979	0.921065	0.655136	1.2208	1.983	2.4754	0.4884
lpg0518, lpg2552, lpg2692	3	1	0	0	0	0	0	0	0	0	0	0	0	1	0	0	0	0	0	0		1	1	1	1	1	1	1	1	1	1	1	2	1	1	1	1	1	1		0.9176	0.379478	0.849979	0.921065	0.655136	0.406934	0.283286	0.61885	0.4884
lpg0518, lpg2552, lpg2692, lpg2733	4	1	0	0	0	0	0	0	1	0	0	0	0	0	0	0	0	0	0	0		1	1	1	1	1	1	2	1	1	1	1	1	1	1	1	1	1	1		0.9176	0.379478	0.849979	0.921065	0.655136	0.406934	0.566572	0.61885	0.4884
lpg0518, lpg2552, lpg2692, lpg2884	4	2	0	0	0	0	0	0	0	0	0	0	0	1	0	2	0	0	0	0		1	1	1	1	1	1	1	1	1	1	1	2	1	3	1	1	1	1		0.9176	0.379478	0.849979	0.921065	0.655136	0.406934	0.283286	0.61885	0.4884
lpg0518, lpg2552, lpg3000	3	9	0	0	0	0	0	8	13	4	7	4	0	0	0	0	5	8	4	6		1	1	1	1	1	9	14	5	8	5	1	1	1	1	6	9	5	7		0.9176	0.379478	0.849979	0.921065	0.655136	3.66241	3.96601	3.09425	3.9072
lpg0518, lpg2628	2	3	0	0	0	0	0	0	0	0	0	4	0	0	0	0	1	0	1	0		1	1	1	1	1	1	1	1	1	5	1	1	1	1	2	1	2	1		0.9176	0.379478	0.849979	0.921065	0.655136	0.406934	0.283286	0.61885	0.4884
lpg0518, lpg2692	2	9	0	0	0	0	0	12	35	11	12	20	0	0	0	0	4	10	8	9		1	1	1	1	1	13	36	12	13	21	1	1	1	1	5	11	9	10		0.9176	0.379478	0.849979	0.921065	0.655136	5.29014	10.1983	7.4262	6.34921
lpg0518, lpg2692, lpg2884	3	1	0	0	0	0	0	0	0	0	0	0	0	0	0	1	0	0	0	0		1	1	1	1	1	1	1	1	1	1	1	1	1	2	1	1	1	1		0.9176	0.379478	0.849979	0.921065	0.655136	0.406934	0.283286	0.61885	0.4884
lpg0518, lpg2733	2	11	1	0	0	1	0	23	76	41	20	37	0	0	0	0	13	52	10	37		2	1	1	2	1	24	77	42	21	38	1	1	1	1	14	53	11	38		1.8352	0.379478	0.849979	1.84213	0.655136	9.76642	21.813	25.9917	10.2564
lpg0518, lpg2733, lpg2815	3	3	0	0	0	0	0	0	0	0	0	0	0	2	1	2	0	0	0	0		1	1	1	1	1	1	1	1	1	1	1	3	2	3	1	1	1	1		0.9176	0.379478	0.849979	0.921065	0.655136	0.406934	0.283286	0.61885	0.4884
lpg0518, lpg2733, lpg2885	3	1	0	0	0	0	0	0	1	0	0	0	0	0	0	0	0	0	0	0		1	1	1	1	1	1	2	1	1	1	1	1	1	1	1	1	1	1		0.9176	0.379478	0.849979	0.921065	0.655136	0.406934	0.566572	0.61885	0.4884
lpg0518, lpg2815	2	6	0	0	0	0	0	1	0	0	0	0	0	1	0	1	0	1	1	2		1	1	1	1	1	2	1	1	1	1	1	2	1	2	1	2	2	3		0.9176	0.379478	0.849979	0.921065	0.655136	0.813868	0.283286	0.61885	0.4884
lpg0518, lpg2815, lpg2884	3	1	0	0	0	0	0	0	0	0	0	0	0	1	0	0	0	0	0	0		1	1	1	1	1	1	1	1	1	1	1	2	1	1	1	1	1	1		0.9176	0.379478	0.849979	0.921065	0.655136	0.406934	0.283286	0.61885	0.4884
lpg0518, lpg2874	2	1	0	1	0	0	0	0	0	0	0	0	0	0	0	0	0	0	0	0		1	2	1	1	1	1	1	1	1	1	1	1	1	1	1	1	1	1		0.9176	0.758956	0.849979	0.921065	0.655136	0.406934	0.283286	0.61885	0.4884
lpg0518, lpg2884	2	18	46	69	39	346	19	8	13	5	6	11	879	1989	275	1216	7	6	5	5		47	70	40	347	20	9	14	6	7	12	880	1990	276	1217	8	7	6	6		43.1272	26.5634	33.9992	319.609	13.1027	3.66241	3.96601	3.7131	3.4188
lpg0518, lpg2885	2	1	0	0	0	0	0	0	0	1	0	0	0	0	0	0	0	0	0	0		1	1	1	1	1	1	1	2	1	1	1	1	1	1	1	1	1	1		0.9176	0.379478	0.849979	0.921065	0.655136	0.406934	0.283286	1.2377	0.4884
lpg0518, lpg2888	2	9	1	0	0	0	0	14	7	6	7	1	0	0	0	0	3	11	0	4		2	1	1	1	1	15	8	7	8	2	1	1	1	1	4	12	1	5		1.8352	0.379478	0.849979	0.921065	0.655136	6.10401	2.26629	4.33195	3.9072
lpg0518, lpg2888, lpg3000	3	1	0	1	0	0	0	0	0	0	0	0	0	0	0	0	0	0	0	0		1	2	1	1	1	1	1	1	1	1	1	1	1	1	1	1	1	1		0.9176	0.758956	0.849979	0.921065	0.655136	0.406934	0.283286	0.61885	0.4884
lpg0518, lpg3000	2	8	0	0	0	0	0	4	22	9	4	6	0	0	0	0	2	7	0	6		1	1	1	1	1	5	23	10	5	7	1	1	1	1	3	8	1	7		0.9176	0.379478	0.849979	0.921065	0.655136	2.03467	6.51558	6.1885	2.442
lpg0621	1	18	10	31	19	9	5	63	158	77	50	125	19	13	14	17	49	122	30	62		11	32	20	10	6	64	159	78	51	126	20	14	15	18	50	123	31	63		10.0936	12.1433	16.9996	9.21065	3.93082	26.0438	45.0425	48.2703	24.9084
lpg0621, lpg0716, lpg0963, lpg1907, lpg2552	5	1	0	0	0	0	0	0	0	0	0	0	0	0	0	0	0	0	1	0		1	1	1	1	1	1	1	1	1	1	1	1	1	1	1	1	2	1		0.9176	0.379478	0.849979	0.921065	0.655136	0.406934	0.283286	0.61885	0.4884
lpg0621, lpg0963	2	9	0	0	0	0	0	1	3	5	6	10	0	0	0	0	1	3	1	3		1	1	1	1	1	2	4	6	7	11	1	1	1	1	2	4	2	4		0.9176	0.379478	0.849979	0.921065	0.655136	0.813868	1.13314	3.7131	3.4188
lpg0621, lpg1099	2	5	0	0	0	0	0	0	2	2	0	1	0	0	0	0	1	0	0	1		1	1	1	1	1	1	3	3	1	2	1	1	1	1	2	1	1	2		0.9176	0.379478	0.849979	0.921065	0.655136	0.406934	0.849858	1.85655	0.4884
lpg0621, lpg1099, lpg1701, lpg2692	4	1	0	0	0	0	0	0	0	0	0	1	0	0	0	0	0	0	0	0		1	1	1	1	1	1	1	1	1	2	1	1	1	1	1	1	1	1		0.9176	0.379478	0.849979	0.921065	0.655136	0.406934	0.283286	0.61885	0.4884
lpg0621, lpg1099, lpg1701, lpg2692, lpg2806	5	2	0	0	0	0	0	0	3	0	0	0	0	0	0	0	0	3	0	0		1	1	1	1	1	1	4	1	1	1	1	1	1	1	1	4	1	1		0.9176	0.379478	0.849979	0.921065	0.655136	0.406934	1.13314	0.61885	0.4884
lpg0621, lpg1099, lpg1701, lpg2806	4	1	0	0	0	0	0	0	1	0	0	0	0	0	0	0	0	0	0	0		1	1	1	1	1	1	2	1	1	1	1	1	1	1	1	1	1	1		0.9176	0.379478	0.849979	0.921065	0.655136	0.406934	0.566572	0.61885	0.4884
lpg0621, lpg1099, lpg2584, lpg3000	4	1	0	0	0	0	0	0	1	0	0	0	0	0	0	0	0	0	0	0		1	1	1	1	1	1	2	1	1	1	1	1	1	1	1	1	1	1		0.9176	0.379478	0.849979	0.921065	0.655136	0.406934	0.566572	0.61885	0.4884
lpg0621, lpg1099, lpg2692	3	2	0	0	0	0	0	1	0	0	0	0	0	0	0	0	0	0	1	0		1	1	1	1	1	2	1	1	1	1	1	1	1	1	1	1	2	1		0.9176	0.379478	0.849979	0.921065	0.655136	0.813868	0.283286	0.61885	0.4884
lpg0621, lpg1099, lpg2692, lpg2806	4	10	0	0	0	0	0	11	43	11	7	22	0	0	1	0	5	9	10	11		1	1	1	1	1	12	44	12	8	23	1	1	2	1	6	10	11	12		0.9176	0.379478	0.849979	0.921065	0.655136	4.88321	12.4646	7.4262	3.9072
lpg0621, lpg1099, lpg2806	3	8	0	0	0	0	0	2	8	1	3	7	0	0	0	0	2	4	0	2		1	1	1	1	1	3	9	2	4	8	1	1	1	1	3	5	1	3		0.9176	0.379478	0.849979	0.921065	0.655136	1.2208	2.54958	1.2377	1.9536
lpg0621, lpg1148, lpg1907	3	1	0	0	0	0	0	0	0	0	0	0	0	0	0	0	0	3	0	0		1	1	1	1	1	1	1	1	1	1	1	1	1	1	1	4	1	1		0.9176	0.379478	0.849979	0.921065	0.655136	0.406934	0.283286	0.61885	0.4884
lpg0621, lpg1525, lpg2223, lpg2692, lpg3000	5	1	0	0	0	0	0	0	1	0	0	0	0	0	0	0	0	0	0	0		1	1	1	1	1	1	2	1	1	1	1	1	1	1	1	1	1	1		0.9176	0.379478	0.849979	0.921065	0.655136	0.406934	0.566572	0.61885	0.4884
lpg0621, lpg1527, lpg1959, lpg2888	4	1	0	0	0	0	0	0	0	0	0	0	0	0	0	1	0	0	0	0		1	1	1	1	1	1	1	1	1	1	1	1	1	2	1	1	1	1		0.9176	0.379478	0.849979	0.921065	0.655136	0.406934	0.283286	0.61885	0.4884
lpg0621, lpg1621, lpg1701, lpg1959, lpg2885, lpg2888	6	1	0	0	0	0	0	0	0	0	0	0	0	0	0	0	0	0	0	1		1	1	1	1	1	1	1	1	1	1	1	1	1	1	1	1	1	2		0.9176	0.379478	0.849979	0.921065	0.655136	0.406934	0.283286	0.61885	0.4884
lpg0621, lpg1621, lpg2806	3	2	0	0	0	0	0	1	0	0	0	1	0	0	0	0	0	0	0	0		1	1	1	1	1	2	1	1	1	2	1	1	1	1	1	1	1	1		0.9176	0.379478	0.849979	0.921065	0.655136	0.813868	0.283286	0.61885	0.4884
lpg0621, lpg1621, lpg2806, lpg3000	4	3	0	0	0	0	0	0	0	1	5	7	0	0	0	0	0	0	0	0		1	1	1	1	1	1	1	2	6	8	1	1	1	1	1	1	1	1		0.9176	0.379478	0.849979	0.921065	0.655136	0.406934	0.283286	1.2377	2.9304
lpg0621, lpg1661, lpg1701, lpg1907	4	1	0	0	0	0	0	0	0	0	1	0	0	0	0	0	0	0	0	0		1	1	1	1	1	1	1	1	2	1	1	1	1	1	1	1	1	1		0.9176	0.379478	0.849979	0.921065	0.655136	0.406934	0.283286	0.61885	0.976801
lpg0621, lpg1661, lpg1701, lpg1907, lpg2888	5	1	0	0	0	0	0	0	0	0	0	0	0	0	0	0	0	0	1	0		1	1	1	1	1	1	1	1	1	1	1	1	1	1	1	1	2	1		0.9176	0.379478	0.849979	0.921065	0.655136	0.406934	0.283286	0.61885	0.4884
lpg0621, lpg1661, lpg1959, lpg2552, lpg2692, lpg2874	6	1	0	0	0	0	0	0	1	0	0	0	0	0	0	0	0	0	0	0		1	1	1	1	1	1	2	1	1	1	1	1	1	1	1	1	1	1		0.9176	0.379478	0.849979	0.921065	0.655136	0.406934	0.566572	0.61885	0.4884
lpg0621, lpg1661, lpg2244	3	3	0	0	0	0	0	0	1	3	0	0	0	0	0	0	0	2	0	0		1	1	1	1	1	1	2	4	1	1	1	1	1	1	1	3	1	1		0.9176	0.379478	0.849979	0.921065	0.655136	0.406934	0.566572	2.4754	0.4884
lpg0621, lpg1689	2	3	0	3	0	0	0	0	0	0	0	0	0	1	0	2	0	0	0	0		1	4	1	1	1	1	1	1	1	1	1	2	1	3	1	1	1	1		0.9176	1.51791	0.849979	0.921065	0.655136	0.406934	0.283286	0.61885	0.4884
lpg0621, lpg1689, lpg2804	3	7	2	4	2	0	1	0	0	0	0	0	0	3	1	5	0	0	0	0		3	5	3	1	2	1	1	1	1	1	1	4	2	6	1	1	1	1		2.7528	1.89739	2.54994	0.921065	1.31027	0.406934	0.283286	0.61885	0.4884
lpg0621, lpg1701	2	8	0	1	0	0	1	0	59	0	42	67	0	0	0	0	0	21	11	21		1	2	1	1	2	1	60	1	43	68	1	1	1	1	1	22	12	22		0.9176	0.758956	0.849979	0.921065	1.31027	0.406934	16.9972	0.61885	21.0012
lpg0621, lpg1701, lpg1907	3	1	0	0	0	0	1	0	0	0	0	0	0	0	0	0	0	0	0	0		1	1	1	1	2	1	1	1	1	1	1	1	1	1	1	1	1	1		0.9176	0.379478	0.849979	0.921065	1.31027	0.406934	0.283286	0.61885	0.4884
lpg0621, lpg1701, lpg1907, lpg3000	4	8	0	5	2	3	1	0	0	0	0	0	2	2	2	1	0	0	0	0		1	6	3	4	2	1	1	1	1	1	3	3	3	2	1	1	1	1		0.9176	2.27687	2.54994	3.68426	1.31027	0.406934	0.283286	0.61885	0.4884
lpg0621, lpg1701, lpg3000	3	3	0	1	0	0	0	0	0	0	0	0	0	0	1	2	0	0	0	0		1	2	1	1	1	1	1	1	1	1	1	1	2	3	1	1	1	1		0.9176	0.758956	0.849979	0.921065	0.655136	0.406934	0.283286	0.61885	0.4884
lpg0621, lpg1776	2	8	1	4	2	2	1	0	0	0	0	0	0	7	1	1	0	0	0	0		2	5	3	3	2	1	1	1	1	1	1	8	2	2	1	1	1	1		1.8352	1.89739	2.54994	2.76319	1.31027	0.406934	0.283286	0.61885	0.4884
lpg0621, lpg1776, lpg1959	3	5	1	1	0	0	0	0	0	0	0	0	0	1	2	1	0	0	0	0		2	2	1	1	1	1	1	1	1	1	1	2	3	2	1	1	1	1		1.8352	0.758956	0.849979	0.921065	0.655136	0.406934	0.283286	0.61885	0.4884
lpg0621, lpg1776, lpg1959, lpg2584	4	8	0	4	1	1	1	0	0	0	0	0	3	2	1	7	0	0	0	0		1	5	2	2	2	1	1	1	1	1	4	3	2	8	1	1	1	1		0.9176	1.89739	1.69996	1.84213	1.31027	0.406934	0.283286	0.61885	0.4884
lpg0621, lpg1776, lpg1959, lpg2584, lpg2628	5	9	7	31	21	15	18	0	0	0	0	0	9	16	19	73	0	0	0	0		8	32	22	16	19	1	1	1	1	1	10	17	20	74	1	1	1	1		7.3408	12.1433	18.6995	14.737	12.4476	0.406934	0.283286	0.61885	0.4884
lpg0621, lpg1776, lpg1959, lpg2628	4	6	0	2	1	0	2	0	0	0	0	0	2	0	2	7	0	0	0	0		1	3	2	1	3	1	1	1	1	1	3	1	3	8	1	1	1	1		0.9176	1.13843	1.69996	0.921065	1.96541	0.406934	0.283286	0.61885	0.4884
lpg0621, lpg1776, lpg2584	3	2	0	1	0	0	0	0	0	0	0	0	0	2	0	0	0	0	0	0		1	2	1	1	1	1	1	1	1	1	1	3	1	1	1	1	1	1		0.9176	0.758956	0.849979	0.921065	0.655136	0.406934	0.283286	0.61885	0.4884
lpg0621, lpg1776, lpg2584, lpg2628	4	7	1	2	1	1	2	0	0	0	0	0	0	0	2	5	0	0	0	0		2	3	2	2	3	1	1	1	1	1	1	1	3	6	1	1	1	1		1.8352	1.13843	1.69996	1.84213	1.96541	0.406934	0.283286	0.61885	0.4884
lpg0621, lpg1776, lpg2628	3	3	0	0	0	0	2	0	0	0	0	0	2	0	0	2	0	0	0	0		1	1	1	1	3	1	1	1	1	1	3	1	1	3	1	1	1	1		0.9176	0.379478	0.849979	0.921065	1.96541	0.406934	0.283286	0.61885	0.4884
lpg0621, lpg1907	2	11	2	0	0	0	0	301	636	272	255	475	0	0	4	0	161	414	123	274		3	1	1	1	1	302	637	273	256	476	1	1	5	1	162	415	124	275		2.7528	0.379478	0.849979	0.921065	0.655136	122.894	180.453	168.946	125.031
lpg0621, lpg1907, lpg2815	3	4	1	0	0	1	0	0	0	0	0	0	0	1	0	3	0	0	0	0		2	1	1	2	1	1	1	1	1	1	1	2	1	4	1	1	1	1		1.8352	0.379478	0.849979	1.84213	0.655136	0.406934	0.283286	0.61885	0.4884
lpg0621, lpg1907, lpg2888	3	3	0	0	0	0	0	0	0	0	0	0	0	0	0	0	1	1	0	1		1	1	1	1	1	1	1	1	1	1	1	1	1	1	2	2	1	2		0.9176	0.379478	0.849979	0.921065	0.655136	0.406934	0.283286	0.61885	0.4884
lpg0621, lpg1907, lpg3000	3	2	0	0	0	1	0	0	0	0	0	0	0	0	0	1	0	0	0	0		1	1	1	2	1	1	1	1	1	1	1	1	1	2	1	1	1	1		0.9176	0.379478	0.849979	1.84213	0.655136	0.406934	0.283286	0.61885	0.4884
lpg0621, lpg1959	2	18	6	16	7	20	4	10	21	8	10	15	41	9	23	6	1	19	4	2		7	17	8	21	5	11	22	9	11	16	42	10	24	7	2	20	5	3		6.4232	6.45112	6.79983	19.3424	3.27568	4.47628	6.23229	5.56965	5.37241
lpg0621, lpg1959, lpg2223, lpg2884, lpg2888	5	1	0	0	0	0	0	0	0	0	0	0	0	0	1	0	0	0	0	0		1	1	1	1	1	1	1	1	1	1	1	1	2	1	1	1	1	1		0.9176	0.379478	0.849979	0.921065	0.655136	0.406934	0.283286	0.61885	0.4884
lpg0621, lpg1959, lpg2552, lpg2692, lpg2884	5	1	0	0	0	0	0	0	0	0	0	0	0	0	1	0	0	0	0	0		1	1	1	1	1	1	1	1	1	1	1	1	2	1	1	1	1	1		0.9176	0.379478	0.849979	0.921065	0.655136	0.406934	0.283286	0.61885	0.4884
lpg0621, lpg1959, lpg2584	3	5	0	1	1	1	0	0	0	0	0	0	0	1	2	0	0	0	0	0		1	2	2	2	1	1	1	1	1	1	1	2	3	1	1	1	1	1		0.9176	0.758956	1.69996	1.84213	0.655136	0.406934	0.283286	0.61885	0.4884
lpg0621, lpg1959, lpg2584, lpg2628	4	7	1	3	0	2	1	0	0	0	0	0	1	3	0	3	0	0	0	0		2	4	1	3	2	1	1	1	1	1	2	4	1	4	1	1	1	1		1.8352	1.51791	0.849979	2.76319	1.31027	0.406934	0.283286	0.61885	0.4884
lpg0621, lpg1959, lpg2628	3	2	0	0	0	0	0	0	0	0	0	0	0	1	1	0	0	0	0	0		1	1	1	1	1	1	1	1	1	1	1	2	2	1	1	1	1	1		0.9176	0.379478	0.849979	0.921065	0.655136	0.406934	0.283286	0.61885	0.4884
lpg0621, lpg1959, lpg2874	3	10	0	0	0	0	0	82	173	83	72	109	0	0	1	0	44	114	56	59		1	1	1	1	1	83	174	84	73	110	1	1	2	1	45	115	57	60		0.9176	0.379478	0.849979	0.921065	0.655136	33.7755	49.2918	51.9834	35.6532
lpg0621, lpg1959, lpg2884	3	9	45	89	47	196	29	0	0	0	0	0	262	56	254	74	0	0	0	0		46	90	48	197	30	1	1	1	1	1	263	57	255	75	1	1	1	1		42.2096	34.153	40.799	181.45	19.6541	0.406934	0.283286	0.61885	0.4884
lpg0621, lpg2223	2	7	3	3	1	1	1	0	0	0	0	0	0	6	0	4	0	0	0	0		4	4	2	2	2	1	1	1	1	1	1	7	1	5	1	1	1	1		3.6704	1.51791	1.69996	1.84213	1.31027	0.406934	0.283286	0.61885	0.4884
lpg0621, lpg2244	2	1	0	0	0	0	0	0	0	1	0	0	0	0	0	0	0	0	0	0		1	1	1	1	1	1	1	2	1	1	1	1	1	1	1	1	1	1		0.9176	0.379478	0.849979	0.921065	0.655136	0.406934	0.283286	1.2377	0.4884
lpg0621, lpg2552, lpg2692, lpg2888	4	1	0	0	0	0	0	0	0	0	0	0	0	0	0	1	0	0	0	0		1	1	1	1	1	1	1	1	1	1	1	1	1	2	1	1	1	1		0.9176	0.379478	0.849979	0.921065	0.655136	0.406934	0.283286	0.61885	0.4884
lpg0621, lpg2552, lpg2804	3	1	0	0	0	0	0	0	0	0	0	0	0	0	1	0	0	0	0	0		1	1	1	1	1	1	1	1	1	1	1	1	2	1	1	1	1	1		0.9176	0.379478	0.849979	0.921065	0.655136	0.406934	0.283286	0.61885	0.4884
lpg0621, lpg2584	2	3	1	0	0	0	0	0	0	0	0	0	0	0	2	1	0	0	0	0		2	1	1	1	1	1	1	1	1	1	1	1	3	2	1	1	1	1		1.8352	0.379478	0.849979	0.921065	0.655136	0.406934	0.283286	0.61885	0.4884
lpg0621, lpg2692	2	3	0	0	0	0	0	1	1	0	0	0	0	0	0	0	0	0	0	1		1	1	1	1	1	2	2	1	1	1	1	1	1	1	1	1	1	2		0.9176	0.379478	0.849979	0.921065	0.655136	0.813868	0.566572	0.61885	0.4884
lpg0621, lpg2692, lpg2806	3	8	0	0	0	0	0	1	8	2	3	2	0	0	0	0	2	1	0	2		1	1	1	1	1	2	9	3	4	3	1	1	1	1	3	2	1	3		0.9176	0.379478	0.849979	0.921065	0.655136	0.813868	2.54958	1.85655	1.9536
lpg0621, lpg2804	2	7	20	103	53	0	10	0	0	0	0	0	0	36	32	54	0	0	0	0		21	104	54	1	11	1	1	1	1	1	1	37	33	55	1	1	1	1		19.2696	39.4657	45.8989	0.921065	7.2065	0.406934	0.283286	0.61885	0.4884
lpg0621, lpg2806	2	1	0	0	0	0	0	0	0	0	0	1	0	0	0	0	0	0	0	0		1	1	1	1	1	1	1	1	1	2	1	1	1	1	1	1	1	1		0.9176	0.379478	0.849979	0.921065	0.655136	0.406934	0.283286	0.61885	0.4884
lpg0621, lpg2806, lpg3000	3	1	0	0	0	0	0	0	0	0	1	0	0	0	0	0	0	0	0	0		1	1	1	1	1	1	1	1	2	1	1	1	1	1	1	1	1	1		0.9176	0.379478	0.849979	0.921065	0.655136	0.406934	0.283286	0.61885	0.976801
lpg0621, lpg2815	2	3	0	0	0	1	0	0	0	0	0	0	0	0	0	1	0	0	1	0		1	1	1	2	1	1	1	1	1	1	1	1	1	2	1	1	2	1		0.9176	0.379478	0.849979	1.84213	0.655136	0.406934	0.283286	0.61885	0.4884
lpg0621, lpg2874	2	9	0	0	0	0	0	11	15	6	5	11	0	0	0	0	6	16	3	5		1	1	1	1	1	12	16	7	6	12	1	1	1	1	7	17	4	6		0.9176	0.379478	0.849979	0.921065	0.655136	4.88321	4.53258	4.33195	2.9304
lpg0621, lpg2884	2	9	2	11	7	15	1	0	0	0	0	0	22	3	23	6	0	0	0	0		3	12	8	16	2	1	1	1	1	1	23	4	24	7	1	1	1	1		2.7528	4.55373	6.79983	14.737	1.31027	0.406934	0.283286	0.61885	0.4884
lpg0621, lpg2888	2	6	3	1	0	3	0	0	0	0	1	0	32	0	14	0	0	0	0	0		4	2	1	4	1	1	1	1	2	1	33	1	15	1	1	1	1	1		3.6704	0.758956	0.849979	3.68426	0.655136	0.406934	0.283286	0.61885	0.976801
lpg0621, lpg2888, lpg3000	3	7	33	7	0	77	0	0	0	0	0	0	283	9	94	17	0	0	0	0		34	8	1	78	1	1	1	1	1	1	284	10	95	18	1	1	1	1		31.1984	3.03582	0.849979	71.8431	0.655136	0.406934	0.283286	0.61885	0.4884
lpg0621, lpg3000	2	10	4	1	0	6	0	0	311	162	69	174	30	0	10	1	0	0	0	0		5	2	1	7	1	1	312	163	70	175	31	1	11	2	1	1	1	1		4.588	0.758956	0.849979	6.44745	0.655136	0.406934	88.3853	100.873	34.188
lpg0716	1	11	0	0	0	1	0	28	57	30	16	37	0	0	0	1	11	33	11	19		1	1	1	2	1	29	58	31	17	38	1	1	1	2	12	34	12	20		0.9176	0.379478	0.849979	1.84213	0.655136	11.8011	16.4306	19.1844	8.30281
lpg0716, lpg0879	2	1	0	0	0	0	0	0	0	0	1	0	0	0	0	0	0	0	0	0		1	1	1	1	1	1	1	1	2	1	1	1	1	1	1	1	1	1		0.9176	0.379478	0.849979	0.921065	0.655136	0.406934	0.283286	0.61885	0.976801
lpg0716, lpg0879, lpg2223	3	2	0	0	0	0	0	1	0	0	0	0	0	0	0	0	0	0	1	0		1	1	1	1	1	2	1	1	1	1	1	1	1	1	1	1	2	1		0.9176	0.379478	0.849979	0.921065	0.655136	0.813868	0.283286	0.61885	0.4884
lpg0716, lpg0963	2	10	0	0	0	0	0	31	66	30	28	33	0	0	1	0	25	38	25	20		1	1	1	1	1	32	67	31	29	34	1	1	2	1	26	39	26	21		0.9176	0.379478	0.849979	0.921065	0.655136	13.0219	18.9802	19.1844	14.1636
lpg0716, lpg0963, lpg1527, lpg1661, lpg2271, lpg2804, lpg2884, lpg2888	8	1	0	0	0	0	0	0	0	1	0	0	0	0	0	0	0	0	0	0		1	1	1	1	1	1	1	2	1	1	1	1	1	1	1	1	1	1		0.9176	0.379478	0.849979	0.921065	0.655136	0.406934	0.283286	1.2377	0.4884
lpg0716, lpg0963, lpg1907	3	2	1	0	0	0	0	0	0	0	0	0	1	0	0	0	0	0	0	0		2	1	1	1	1	1	1	1	1	1	2	1	1	1	1	1	1	1		1.8352	0.379478	0.849979	0.921065	0.655136	0.406934	0.283286	0.61885	0.4884
lpg0716, lpg0963, lpg1907, lpg2733	4	6	3	0	2	1	0	0	0	0	0	0	1	0	2	1	0	0	0	0		4	1	3	2	1	1	1	1	1	1	2	1	3	2	1	1	1	1		3.6704	0.379478	2.54994	1.84213	0.655136	0.406934	0.283286	0.61885	0.4884
lpg0716, lpg0963, lpg1907, lpg2733, lpg3000	5	9	30	5	10	27	5	0	0	0	0	0	27	8	6	8	0	0	0	0		31	6	11	28	6	1	1	1	1	1	28	9	7	9	1	1	1	1		28.4456	2.27687	9.34977	25.7898	3.93082	0.406934	0.283286	0.61885	0.4884
lpg0716, lpg0963, lpg1907, lpg3000	4	4	0	2	1	0	0	0	0	0	0	0	4	1	0	0	0	0	0	0		1	3	2	1	1	1	1	1	1	1	5	2	1	1	1	1	1	1		0.9176	1.13843	1.69996	0.921065	0.655136	0.406934	0.283286	0.61885	0.4884
lpg0716, lpg0963, lpg2552	3	9	0	0	0	0	0	160	338	155	130	267	0	0	0	0	97	175	64	79		1	1	1	1	1	161	339	156	131	268	1	1	1	1	98	176	65	80		0.9176	0.379478	0.849979	0.921065	0.655136	65.5164	96.034	96.5406	63.9805
lpg0716, lpg0963, lpg2552, lpg2584, lpg2885	5	1	0	0	0	0	0	1	0	0	0	0	0	0	0	0	0	0	0	0		1	1	1	1	1	2	1	1	1	1	1	1	1	1	1	1	1	1		0.9176	0.379478	0.849979	0.921065	0.655136	0.813868	0.283286	0.61885	0.4884
lpg0716, lpg0963, lpg2552, lpg2884	4	1	0	0	0	0	0	1	0	0	0	0	0	0	0	0	0	0	0	0		1	1	1	1	1	2	1	1	1	1	1	1	1	1	1	1	1	1		0.9176	0.379478	0.849979	0.921065	0.655136	0.813868	0.283286	0.61885	0.4884
lpg0716, lpg0963, lpg2733	3	2	1	0	0	0	0	0	0	0	0	0	1	0	0	0	0	0	0	0		2	1	1	1	1	1	1	1	1	1	2	1	1	1	1	1	1	1		1.8352	0.379478	0.849979	0.921065	0.655136	0.406934	0.283286	0.61885	0.4884
lpg0716, lpg0963, lpg2733, lpg3000	4	3	3	0	0	0	0	0	0	0	0	0	3	0	0	1	0	0	0	0		4	1	1	1	1	1	1	1	1	1	4	1	1	2	1	1	1	1		3.6704	0.379478	0.849979	0.921065	0.655136	0.406934	0.283286	0.61885	0.4884
lpg0716, lpg0963, lpg2884	3	10	0	0	0	0	0	66	109	49	46	34	0	0	2	0	65	87	67	73		1	1	1	1	1	67	110	50	47	35	1	1	3	1	66	88	68	74		0.9176	0.379478	0.849979	0.921065	0.655136	27.2646	31.1615	30.9425	22.9548
lpg0716, lpg0963, lpg2885	3	1	0	0	0	0	0	0	0	0	0	0	0	0	0	0	0	0	0	1		1	1	1	1	1	1	1	1	1	1	1	1	1	1	1	1	1	2		0.9176	0.379478	0.849979	0.921065	0.655136	0.406934	0.283286	0.61885	0.4884
lpg0716, lpg0963, lpg3000	3	1	0	0	0	0	0	0	0	0	0	0	1	0	0	0	0	0	0	0		1	1	1	1	1	1	1	1	1	1	2	1	1	1	1	1	1	1		0.9176	0.379478	0.849979	0.921065	0.655136	0.406934	0.283286	0.61885	0.4884
lpg0716, lpg1099	2	7	0	0	0	0	0	3	9	1	0	2	0	0	0	0	2	4	0	2		1	1	1	1	1	4	10	2	1	3	1	1	1	1	3	5	1	3		0.9176	0.379478	0.849979	0.921065	0.655136	1.62774	2.83286	1.2377	0.4884
lpg0716, lpg1099, lpg1525, lpg2552	4	1	0	0	0	0	0	0	0	1	0	0	0	0	0	0	0	0	0	0		1	1	1	1	1	1	1	2	1	1	1	1	1	1	1	1	1	1		0.9176	0.379478	0.849979	0.921065	0.655136	0.406934	0.283286	1.2377	0.4884
lpg0716, lpg1099, lpg2552	3	9	0	0	0	0	0	12	43	8	14	22	0	0	0	0	8	27	5	11		1	1	1	1	1	13	44	9	15	23	1	1	1	1	9	28	6	12		0.9176	0.379478	0.849979	0.921065	0.655136	5.29014	12.4646	5.56965	7.32601
lpg0716, lpg1099, lpg2885	3	2	0	2	0	0	0	0	0	0	0	0	0	0	0	4	0	0	0	0		1	3	1	1	1	1	1	1	1	1	1	1	1	5	1	1	1	1		0.9176	1.13843	0.849979	0.921065	0.655136	0.406934	0.283286	0.61885	0.4884
lpg0716, lpg1137	2	5	0	0	0	0	0	1	1	0	0	2	0	0	0	0	1	0	0	1		1	1	1	1	1	2	2	1	1	3	1	1	1	1	2	1	1	2		0.9176	0.379478	0.849979	0.921065	0.655136	0.813868	0.566572	0.61885	0.4884
lpg0716, lpg1137, lpg1661	3	6	0	0	0	0	0	2	2	1	0	1	0	0	0	0	0	7	2	0		1	1	1	1	1	3	3	2	1	2	1	1	1	1	1	8	3	1		0.9176	0.379478	0.849979	0.921065	0.655136	1.2208	0.849858	1.2377	0.4884
lpg0716, lpg1137, lpg1661, lpg2244	4	10	0	0	0	0	0	5	16	18	3	10	0	0	1	0	10	30	4	15		1	1	1	1	1	6	17	19	4	11	1	1	2	1	11	31	5	16		0.9176	0.379478	0.849979	0.921065	0.655136	2.4416	4.81586	11.7582	1.9536
lpg0716, lpg1137, lpg2244	3	5	0	0	0	0	0	0	6	0	2	0	0	0	0	0	3	8	0	4		1	1	1	1	1	1	7	1	3	1	1	1	1	1	4	9	1	5		0.9176	0.379478	0.849979	0.921065	0.655136	0.406934	1.983	0.61885	1.4652
lpg0716, lpg1527	2	2	0	0	0	0	0	0	3	0	0	0	0	0	0	0	1	0	0	0		1	1	1	1	1	1	4	1	1	1	1	1	1	1	2	1	1	1		0.9176	0.379478	0.849979	0.921065	0.655136	0.406934	1.13314	0.61885	0.4884
lpg0716, lpg1661	2	7	0	0	0	0	0	5	1	0	1	2	0	0	0	0	4	3	1	0		1	1	1	1	1	6	2	1	2	3	1	1	1	1	5	4	2	1		0.9176	0.379478	0.849979	0.921065	0.655136	2.4416	0.566572	0.61885	0.976801
lpg0716, lpg1661, lpg2244	3	6	0	0	0	0	0	1	4	3	0	2	0	0	0	0	1	1	0	0		1	1	1	1	1	2	5	4	1	3	1	1	1	1	2	2	1	1		0.9176	0.379478	0.849979	0.921065	0.655136	0.813868	1.41643	2.4754	0.4884
lpg0716, lpg1661, lpg2271	3	9	0	0	0	0	0	4	3	3	9	4	0	0	0	0	4	3	3	3		1	1	1	1	1	5	4	4	10	5	1	1	1	1	5	4	4	4		0.9176	0.379478	0.849979	0.921065	0.655136	2.03467	1.13314	2.4754	4.884
lpg0716, lpg1661, lpg2271, lpg2888	4	9	0	0	0	0	0	108	70	45	72	57	0	0	0	0	78	101	45	23		1	1	1	1	1	109	71	46	73	58	1	1	1	1	79	102	46	24		0.9176	0.379478	0.849979	0.921065	0.655136	44.3558	20.1133	28.4671	35.6532
lpg0716, lpg1661, lpg2888	3	9	0	0	0	0	0	12	8	5	11	10	0	0	0	0	5	8	5	3		1	1	1	1	1	13	9	6	12	11	1	1	1	1	6	9	6	4		0.9176	0.379478	0.849979	0.921065	0.655136	5.29014	2.54958	3.7131	5.86081
lpg0716, lpg1701	2	9	0	0	0	0	0	6	18	7	4	8	0	0	0	0	4	9	2	17		1	1	1	1	1	7	19	8	5	9	1	1	1	1	5	10	3	18		0.9176	0.379478	0.849979	0.921065	0.655136	2.84854	5.38244	4.9508	2.442
lpg0716, lpg1701, lpg2806	3	9	0	0	0	0	0	20	7	3	9	4	0	0	0	0	9	13	4	2		1	1	1	1	1	21	8	4	10	5	1	1	1	1	10	14	5	3		0.9176	0.379478	0.849979	0.921065	0.655136	8.54562	2.26629	2.4754	4.884
lpg0716, lpg1701, lpg2806, lpg2885	4	9	0	0	0	0	0	97	55	23	68	40	0	0	0	0	66	89	47	53		1	1	1	1	1	98	56	24	69	41	1	1	1	1	67	90	48	54		0.9176	0.379478	0.849979	0.921065	0.655136	39.8795	15.864	14.8524	33.6996
lpg0716, lpg1701, lpg2885	3	9	0	0	0	0	0	10	4	2	4	2	0	0	0	0	7	6	5	4		1	1	1	1	1	11	5	3	5	3	1	1	1	1	8	7	6	5		0.9176	0.379478	0.849979	0.921065	0.655136	4.47628	1.41643	1.85655	2.442
lpg0716, lpg1907, lpg2733	3	1	4	0	0	0	0	0	0	0	0	0	0	0	0	0	0	0	0	0		5	1	1	1	1	1	1	1	1	1	1	1	1	1	1	1	1	1		4.588	0.379478	0.849979	0.921065	0.655136	0.406934	0.283286	0.61885	0.4884
lpg0716, lpg1907, lpg2733, lpg3000	4	9	6	1	1	3	1	0	0	0	0	0	2	1	3	1	0	0	0	0		7	2	2	4	2	1	1	1	1	1	3	2	4	2	1	1	1	1		6.4232	0.758956	1.69996	3.68426	1.31027	0.406934	0.283286	0.61885	0.4884
lpg0716, lpg1907, lpg3000	3	2	1	0	0	0	0	0	0	0	0	0	2	0	0	0	0	0	0	0		2	1	1	1	1	1	1	1	1	1	3	1	1	1	1	1	1	1		1.8352	0.379478	0.849979	0.921065	0.655136	0.406934	0.283286	0.61885	0.4884
lpg0716, lpg2223	2	8	0	0	0	0	0	6	9	4	2	4	0	0	0	0	0	5	2	5		1	1	1	1	1	7	10	5	3	5	1	1	1	1	1	6	3	6		0.9176	0.379478	0.849979	0.921065	0.655136	2.84854	2.83286	3.09425	1.4652
lpg0716, lpg2244	2	1	0	0	0	0	0	0	0	1	0	0	0	0	0	0	0	0	0	0		1	1	1	1	1	1	1	2	1	1	1	1	1	1	1	1	1	1		0.9176	0.379478	0.849979	0.921065	0.655136	0.406934	0.283286	1.2377	0.4884
lpg0716, lpg2271	2	6	0	0	0	0	0	1	3	1	2	0	0	0	0	0	1	3	0	0		1	1	1	1	1	2	4	2	3	1	1	1	1	1	2	4	1	1		0.9176	0.379478	0.849979	0.921065	0.655136	0.813868	1.13314	1.2377	1.4652
lpg0716, lpg2271, lpg2888	3	9	0	0	0	0	0	21	10	7	13	10	0	0	0	0	17	20	5	5		1	1	1	1	1	22	11	8	14	11	1	1	1	1	18	21	6	6		0.9176	0.379478	0.849979	0.921065	0.655136	8.95255	3.11615	4.9508	6.83761
lpg0716, lpg2552	2	9	0	0	0	0	0	26	59	25	28	54	0	0	0	0	11	30	9	14		1	1	1	1	1	27	60	26	29	55	1	1	1	1	12	31	10	15		0.9176	0.379478	0.849979	0.921065	0.655136	10.9872	16.9972	16.0901	14.1636
lpg0716, lpg2733, lpg3000	3	3	2	0	1	0	1	0	0	0	0	0	0	0	0	0	0	0	0	0		3	1	2	1	2	1	1	1	1	1	1	1	1	1	1	1	1	1		2.7528	0.379478	1.69996	0.921065	1.31027	0.406934	0.283286	0.61885	0.4884
lpg0716, lpg2806	2	9	0	0	0	0	0	25	79	44	26	52	0	0	0	0	15	36	19	29		1	1	1	1	1	26	80	45	27	53	1	1	1	1	16	37	20	30		0.9176	0.379478	0.849979	0.921065	0.655136	10.5803	22.6629	27.8483	13.1868
lpg0716, lpg2806, lpg2885	3	9	0	0	0	0	0	8	4	2	4	2	0	0	0	0	3	7	2	4		1	1	1	1	1	9	5	3	5	3	1	1	1	1	4	8	3	5		0.9176	0.379478	0.849979	0.921065	0.655136	3.66241	1.41643	1.85655	2.442
lpg0716, lpg2874	2	7	0	0	0	0	0	3	0	1	1	1	0	0	0	0	3	4	0	2		1	1	1	1	1	4	1	2	2	2	1	1	1	1	4	5	1	3		0.9176	0.379478	0.849979	0.921065	0.655136	1.62774	0.283286	1.2377	0.976801
lpg0716, lpg2884	2	10	0	0	0	0	0	14	15	7	7	9	1	0	0	0	11	12	10	11		1	1	1	1	1	15	16	8	8	10	2	1	1	1	12	13	11	12		0.9176	0.379478	0.849979	0.921065	0.655136	6.10401	4.53258	4.9508	3.9072
lpg0716, lpg2885	2	12	0	0	1	0	1	3	1	0	0	1	1	0	4	5	1	1	2	2		1	1	2	1	2	4	2	1	1	2	2	1	5	6	2	2	3	3		0.9176	0.379478	1.69996	0.921065	1.31027	1.62774	0.566572	0.61885	0.4884
lpg0716, lpg2888	2	9	0	0	0	0	0	5	7	1	6	3	0	0	0	0	4	2	2	1		1	1	1	1	1	6	8	2	7	4	1	1	1	1	5	3	3	2		0.9176	0.379478	0.849979	0.921065	0.655136	2.4416	2.26629	1.2377	3.4188
lpg0716, lpg3000	2	1	0	0	0	0	0	0	0	0	0	0	0	0	1	0	0	0	0	0		1	1	1	1	1	1	1	1	1	1	1	1	2	1	1	1	1	1		0.9176	0.379478	0.849979	0.921065	0.655136	0.406934	0.283286	0.61885	0.4884
lpg0879	1	9	0	0	0	0	0	32	39	27	17	34	0	0	0	0	13	34	13	15		1	1	1	1	1	33	40	28	18	35	1	1	1	1	14	35	14	16		0.9176	0.379478	0.849979	0.921065	0.655136	13.4288	11.3314	17.3278	8.79121
lpg0879, lpg0963	2	1	0	0	0	0	0	0	0	0	0	0	0	0	0	0	17	0	0	0		1	1	1	1	1	1	1	1	1	1	1	1	1	1	18	1	1	1		0.9176	0.379478	0.849979	0.921065	0.655136	0.406934	0.283286	0.61885	0.4884
lpg0879, lpg1099, lpg1148, lpg1525, lpg1702, lpg2223, lpg2552	7	1	0	0	0	0	0	0	0	0	1	0	0	0	0	0	0	0	0	0		1	1	1	1	1	1	1	1	2	1	1	1	1	1	1	1	1	1		0.9176	0.379478	0.849979	0.921065	0.655136	0.406934	0.283286	0.61885	0.976801
lpg0879, lpg1099, lpg1148, lpg1525, lpg2223, lpg2552	6	1	0	0	0	0	0	0	0	0	0	1	0	0	0	0	0	0	0	0		1	1	1	1	1	1	1	1	1	2	1	1	1	1	1	1	1	1		0.9176	0.379478	0.849979	0.921065	0.655136	0.406934	0.283286	0.61885	0.4884
lpg0879, lpg1099, lpg1148, lpg1702, lpg2223, lpg2552	6	1	0	0	0	0	0	0	0	0	0	0	0	0	0	0	0	0	0	1		1	1	1	1	1	1	1	1	1	1	1	1	1	1	1	1	1	2		0.9176	0.379478	0.849979	0.921065	0.655136	0.406934	0.283286	0.61885	0.4884
lpg0879, lpg1148, lpg1702, lpg1776, lpg2244, lpg2692, lpg2806	7	3	0	0	0	0	0	0	0	0	1	0	0	0	0	0	1	0	0	1		1	1	1	1	1	1	1	1	2	1	1	1	1	1	2	1	1	2		0.9176	0.379478	0.849979	0.921065	0.655136	0.406934	0.283286	0.61885	0.976801
lpg0879, lpg1148, lpg1702, lpg1776, lpg2244, lpg2692, lpg2806, lpg2815	8	1	0	0	0	0	0	0	0	0	0	0	0	0	0	0	0	0	0	1		1	1	1	1	1	1	1	1	1	1	1	1	1	1	1	1	1	2		0.9176	0.379478	0.849979	0.921065	0.655136	0.406934	0.283286	0.61885	0.4884
lpg0879, lpg1148, lpg1702, lpg1776, lpg2244, lpg2806, lpg2815	7	1	0	0	0	0	0	0	0	0	0	0	0	0	0	0	0	0	0	1		1	1	1	1	1	1	1	1	1	1	1	1	1	1	1	1	1	2		0.9176	0.379478	0.849979	0.921065	0.655136	0.406934	0.283286	0.61885	0.4884
lpg0879, lpg1148, lpg1776, lpg2244, lpg2692, lpg2806	6	1	0	0	0	0	0	0	0	0	1	0	0	0	0	0	0	0	0	0		1	1	1	1	1	1	1	1	2	1	1	1	1	1	1	1	1	1		0.9176	0.379478	0.849979	0.921065	0.655136	0.406934	0.283286	0.61885	0.976801
lpg0879, lpg1527, lpg2884	3	1	0	0	0	0	0	0	0	0	0	0	0	0	0	0	0	0	1	0		1	1	1	1	1	1	1	1	1	1	1	1	1	1	1	1	2	1		0.9176	0.379478	0.849979	0.921065	0.655136	0.406934	0.283286	0.61885	0.4884
lpg0879, lpg1661	2	9	0	0	0	0	0	4	10	7	2	7	0	0	0	0	2	3	1	3		1	1	1	1	1	5	11	8	3	8	1	1	1	1	3	4	2	4		0.9176	0.379478	0.849979	0.921065	0.655136	2.03467	3.11615	4.9508	1.4652
lpg0879, lpg1661, lpg1701	3	6	0	0	0	0	0	1	3	1	1	0	0	0	0	0	0	1	1	0		1	1	1	1	1	2	4	2	2	1	1	1	1	1	1	2	2	1		0.9176	0.379478	0.849979	0.921065	0.655136	0.813868	1.13314	1.2377	0.976801
lpg0879, lpg1661, lpg1701, lpg2733	4	6	0	0	0	0	0	3	1	2	1	1	0	0	0	0	0	1	0	0		1	1	1	1	1	4	2	3	2	2	1	1	1	1	1	2	1	1		0.9176	0.379478	0.849979	0.921065	0.655136	1.62774	0.566572	1.85655	0.976801
lpg0879, lpg1661, lpg2733	3	1	0	0	0	0	0	0	1	0	0	0	0	0	0	0	0	0	0	0		1	1	1	1	1	1	2	1	1	1	1	1	1	1	1	1	1	1		0.9176	0.379478	0.849979	0.921065	0.655136	0.406934	0.566572	0.61885	0.4884
lpg0879, lpg1661, lpg2815	3	3	0	0	0	0	0	0	0	0	1	0	0	0	0	0	0	2	0	1		1	1	1	1	1	1	1	1	2	1	1	1	1	1	1	3	1	2		0.9176	0.379478	0.849979	0.921065	0.655136	0.406934	0.283286	0.61885	0.976801
lpg0879, lpg1689	2	5	0	0	0	0	0	2	0	0	4	0	0	0	0	0	1	1	1	0		1	1	1	1	1	3	1	1	5	1	1	1	1	1	2	2	2	1		0.9176	0.379478	0.849979	0.921065	0.655136	1.2208	0.283286	0.61885	2.442
lpg0879, lpg1689, lpg2815	3	5	0	0	0	0	0	3	0	0	0	0	0	0	0	0	1	3	2	1		1	1	1	1	1	4	1	1	1	1	1	1	1	1	2	4	3	2		0.9176	0.379478	0.849979	0.921065	0.655136	1.62774	0.283286	0.61885	0.4884
lpg0879, lpg1689, lpg2815, lpg2874	4	6	0	0	0	0	0	12	0	0	15	0	0	0	0	0	4	9	5	6		1	1	1	1	1	13	1	1	16	1	1	1	1	1	5	10	6	7		0.9176	0.379478	0.849979	0.921065	0.655136	5.29014	0.283286	0.61885	7.81441
lpg0879, lpg1689, lpg2874	3	6	0	0	0	0	0	3	0	0	4	0	0	0	0	0	2	6	2	3		1	1	1	1	1	4	1	1	5	1	1	1	1	1	3	7	3	4		0.9176	0.379478	0.849979	0.921065	0.655136	1.62774	0.283286	0.61885	2.442
lpg0879, lpg1701	2	1	0	0	0	0	0	0	0	0	0	0	0	0	0	0	0	0	0	1		1	1	1	1	1	1	1	1	1	1	1	1	1	1	1	1	1	2		0.9176	0.379478	0.849979	0.921065	0.655136	0.406934	0.283286	0.61885	0.4884
lpg0879, lpg1701, lpg2733	3	2	0	0	0	0	0	0	0	0	0	0	0	0	0	0	0	1	0	1		1	1	1	1	1	1	1	1	1	1	1	1	1	1	1	2	1	2		0.9176	0.379478	0.849979	0.921065	0.655136	0.406934	0.283286	0.61885	0.4884
lpg0879, lpg1702, lpg1776, lpg2244, lpg2806, lpg2815	6	1	0	0	0	0	0	0	0	0	1	0	0	0	0	0	0	0	0	0		1	1	1	1	1	1	1	1	2	1	1	1	1	1	1	1	1	1		0.9176	0.379478	0.849979	0.921065	0.655136	0.406934	0.283286	0.61885	0.976801
lpg0879, lpg1702, lpg1776, lpg2692	4	1	0	0	0	0	0	0	0	0	1	0	0	0	0	0	0	0	0	0		1	1	1	1	1	1	1	1	2	1	1	1	1	1	1	1	1	1		0.9176	0.379478	0.849979	0.921065	0.655136	0.406934	0.283286	0.61885	0.976801
lpg0879, lpg1702, lpg2552	3	1	0	0	0	0	0	0	0	0	0	0	0	0	0	0	0	1	0	0		1	1	1	1	1	1	1	1	1	1	1	1	1	1	1	2	1	1		0.9176	0.379478	0.849979	0.921065	0.655136	0.406934	0.283286	0.61885	0.4884
lpg0879, lpg1776, lpg2692	3	1	0	0	0	0	0	0	0	0	0	0	0	0	0	0	0	0	0	1		1	1	1	1	1	1	1	1	1	1	1	1	1	1	1	1	1	2		0.9176	0.379478	0.849979	0.921065	0.655136	0.406934	0.283286	0.61885	0.4884
lpg0879, lpg2223	2	1	0	0	0	0	0	0	0	0	1	0	0	0	0	0	0	0	0	0		1	1	1	1	1	1	1	1	2	1	1	1	1	1	1	1	1	1		0.9176	0.379478	0.849979	0.921065	0.655136	0.406934	0.283286	0.61885	0.976801
lpg0879, lpg2244, lpg3000	3	1	0	0	0	0	0	1	0	0	0	0	0	0	0	0	0	0	0	0		1	1	1	1	1	2	1	1	1	1	1	1	1	1	1	1	1	1		0.9176	0.379478	0.849979	0.921065	0.655136	0.813868	0.283286	0.61885	0.4884
lpg0879, lpg2733	2	1	0	0	0	0	0	0	0	1	0	0	0	0	0	0	0	0	0	0		1	1	1	1	1	1	1	2	1	1	1	1	1	1	1	1	1	1		0.9176	0.379478	0.849979	0.921065	0.655136	0.406934	0.283286	1.2377	0.4884
lpg0879, lpg2815	2	4	0	0	0	0	0	1	0	0	3	0	0	0	0	0	2	0	2	0		1	1	1	1	1	2	1	1	4	1	1	1	1	1	3	1	3	1		0.9176	0.379478	0.849979	0.921065	0.655136	0.813868	0.283286	0.61885	1.9536
lpg0879, lpg2815, lpg2874	3	4	0	0	0	0	0	3	0	0	2	0	0	0	0	0	1	1	0	0		1	1	1	1	1	4	1	1	3	1	1	1	1	1	2	2	1	1		0.9176	0.379478	0.849979	0.921065	0.655136	1.62774	0.283286	0.61885	1.4652
lpg0879, lpg2874	2	2	0	0	0	0	0	0	0	0	2	0	0	0	0	0	1	0	0	0		1	1	1	1	1	1	1	1	3	1	1	1	1	1	2	1	1	1		0.9176	0.379478	0.849979	0.921065	0.655136	0.406934	0.283286	0.61885	1.4652
lpg0879, lpg2884	2	1	0	0	0	0	0	0	0	0	0	0	0	0	0	0	0	0	38	0		1	1	1	1	1	1	1	1	1	1	1	1	1	1	1	1	39	1		0.9176	0.379478	0.849979	0.921065	0.655136	0.406934	0.283286	0.61885	0.4884
lpg0879, lpg2888	2	8	0	0	0	0	0	2	1	1	3	0	0	0	0	0	2	3	4	1		1	1	1	1	1	3	2	2	4	1	1	1	1	1	3	4	5	2		0.9176	0.379478	0.849979	0.921065	0.655136	1.2208	0.566572	1.2377	1.9536
lpg0879, lpg2888, lpg3000	3	8	0	0	0	0	0	20	2	0	15	4	0	0	0	0	12	7	8	3		1	1	1	1	1	21	3	1	16	5	1	1	1	1	13	8	9	4		0.9176	0.379478	0.849979	0.921065	0.655136	8.54562	0.849858	0.61885	7.81441
lpg0879, lpg3000	2	3	0	0	0	0	0	1	0	0	0	0	0	0	0	0	2	0	0	2		1	1	1	1	1	2	1	1	1	1	1	1	1	1	3	1	1	3		0.9176	0.379478	0.849979	0.921065	0.655136	0.813868	0.283286	0.61885	0.4884
lpg0963	1	18	70	344	147	76	186	37	74	38	26	42	121	98	152	72	32	60	32	22		71	345	148	77	187	38	75	39	27	43	122	99	153	73	33	61	33	23		65.1496	130.92	125.797	70.922	122.51	15.4635	21.2465	24.1352	13.1868
lpg0963, lpg1099	2	1	0	1	0	0	0	0	0	0	0	0	0	0	0	0	0	0	0	0		1	2	1	1	1	1	1	1	1	1	1	1	1	1	1	1	1	1		0.9176	0.758956	0.849979	0.921065	0.655136	0.406934	0.283286	0.61885	0.4884
lpg0963, lpg1099, lpg1702	3	4	0	3	2	0	0	0	0	0	0	0	0	4	0	2	0	0	0	0		1	4	3	1	1	1	1	1	1	1	1	5	1	3	1	1	1	1		0.9176	1.51791	2.54994	0.921065	0.655136	0.406934	0.283286	0.61885	0.4884
lpg0963, lpg1099, lpg2223, lpg2271, lpg2552, lpg2584, lpg2888	7	1	0	0	0	0	0	0	0	0	0	0	0	1	0	0	0	0	0	0		1	1	1	1	1	1	1	1	1	1	1	2	1	1	1	1	1	1		0.9176	0.379478	0.849979	0.921065	0.655136	0.406934	0.283286	0.61885	0.4884
lpg0963, lpg1099, lpg2223, lpg2271, lpg2552, lpg2584, lpg2888, lpg3000	8	1	0	0	0	1	0	0	0	0	0	0	0	0	0	0	0	0	0	0		1	1	1	2	1	1	1	1	1	1	1	1	1	1	1	1	1	1		0.9176	0.379478	0.849979	1.84213	0.655136	0.406934	0.283286	0.61885	0.4884
lpg0963, lpg1099, lpg2271, lpg2552, lpg2584	5	1	0	0	0	0	0	0	0	0	0	0	0	1	0	0	0	0	0	0		1	1	1	1	1	1	1	1	1	1	1	2	1	1	1	1	1	1		0.9176	0.379478	0.849979	0.921065	0.655136	0.406934	0.283286	0.61885	0.4884
lpg0963, lpg1099, lpg2584	3	1	0	1	0	0	0	0	0	0	0	0	0	0	0	0	0	0	0	0		1	2	1	1	1	1	1	1	1	1	1	1	1	1	1	1	1	1		0.9176	0.758956	0.849979	0.921065	0.655136	0.406934	0.283286	0.61885	0.4884
lpg0963, lpg1137	2	18	2	3	3	2	3	2	4	3	1	3	2	7	2	9	1	1	2	1		3	4	4	3	4	3	5	4	2	4	3	8	3	10	2	2	3	2		2.7528	1.51791	3.39992	2.76319	2.62055	1.2208	1.41643	2.4754	0.976801
lpg0963, lpg1137, lpg1525	3	3	0	0	0	0	0	0	2	0	0	0	0	0	0	0	0	2	0	1		1	1	1	1	1	1	3	1	1	1	1	1	1	1	1	3	1	2		0.9176	0.379478	0.849979	0.921065	0.655136	0.406934	0.849858	0.61885	0.4884
lpg0963, lpg1137, lpg1525, lpg1701	4	8	0	0	0	0	0	3	8	5	1	3	0	0	0	0	0	4	1	5		1	1	1	1	1	4	9	6	2	4	1	1	1	1	1	5	2	6		0.9176	0.379478	0.849979	0.921065	0.655136	1.62774	2.54958	3.7131	0.976801
lpg0963, lpg1137, lpg1525, lpg1701, lpg1702	5	10	0	0	0	0	0	28	90	62	10	41	0	0	2	0	21	77	18	38		1	1	1	1	1	29	91	63	11	42	1	1	3	1	22	78	19	39		0.9176	0.379478	0.849979	0.921065	0.655136	11.8011	25.779	38.9876	5.37241
lpg0963, lpg1137, lpg1525, lpg1702	4	7	0	0	0	0	0	1	4	4	0	3	0	0	0	0	3	2	0	3		1	1	1	1	1	2	5	5	1	4	1	1	1	1	4	3	1	4		0.9176	0.379478	0.849979	0.921065	0.655136	0.813868	1.41643	3.09425	0.4884
lpg0963, lpg1137, lpg1689, lpg2692	4	2	0	0	0	0	0	0	0	0	0	0	1	0	1	0	0	0	0	0		1	1	1	1	1	1	1	1	1	1	2	1	2	1	1	1	1	1		0.9176	0.379478	0.849979	0.921065	0.655136	0.406934	0.283286	0.61885	0.4884
lpg0963, lpg1137, lpg1701	3	5	0	0	0	0	0	0	1	1	0	4	0	0	0	0	1	0	0	1		1	1	1	1	1	1	2	2	1	5	1	1	1	1	2	1	1	2		0.9176	0.379478	0.849979	0.921065	0.655136	0.406934	0.566572	1.2377	0.4884
lpg0963, lpg1137, lpg1701, lpg1702	4	9	0	0	0	0	0	6	26	15	7	9	0	0	0	0	4	20	5	11		1	1	1	1	1	7	27	16	8	10	1	1	1	1	5	21	6	12		0.9176	0.379478	0.849979	0.921065	0.655136	2.84854	7.64873	9.9016	3.9072
lpg0963, lpg1137, lpg1702	3	4	0	0	0	0	0	0	3	0	0	2	0	0	0	0	2	1	0	0		1	1	1	1	1	1	4	1	1	3	1	1	1	1	3	2	1	1		0.9176	0.379478	0.849979	0.921065	0.655136	0.406934	1.13314	0.61885	0.4884
lpg0963, lpg1137, lpg1907, lpg2806, lpg2815, lpg2884	6	1	0	0	0	0	0	0	0	0	1	0	0	0	0	0	0	0	0	0		1	1	1	1	1	1	1	1	2	1	1	1	1	1	1	1	1	1		0.9176	0.379478	0.849979	0.921065	0.655136	0.406934	0.283286	0.61885	0.976801
lpg0963, lpg1137, lpg2223	3	3	0	0	1	1	0	0	0	0	0	0	0	0	0	3	0	0	0	0		1	1	2	2	1	1	1	1	1	1	1	1	1	4	1	1	1	1		0.9176	0.379478	1.69996	1.84213	0.655136	0.406934	0.283286	0.61885	0.4884
lpg0963, lpg1137, lpg2223, lpg2885	4	9	1	4	4	1	2	0	0	0	0	0	2	3	3	14	0	0	0	0		2	5	5	2	3	1	1	1	1	1	3	4	4	15	1	1	1	1		1.8352	1.89739	4.24989	1.84213	1.96541	0.406934	0.283286	0.61885	0.4884
lpg0963, lpg1137, lpg2244, lpg2552, lpg2874	5	1	0	0	0	0	0	0	0	0	0	0	0	0	1	0	0	0	0	0		1	1	1	1	1	1	1	1	1	1	1	1	2	1	1	1	1	1		0.9176	0.379478	0.849979	0.921065	0.655136	0.406934	0.283286	0.61885	0.4884
lpg0963, lpg1148	2	2	0	0	0	0	0	0	0	1	0	1	0	0	0	0	0	0	0	0		1	1	1	1	1	1	1	2	1	2	1	1	1	1	1	1	1	1		0.9176	0.379478	0.849979	0.921065	0.655136	0.406934	0.283286	1.2377	0.4884
lpg0963, lpg1148, lpg1527, lpg1907, lpg2628, lpg2733, lpg2884	7	1	0	0	0	0	0	0	0	0	0	0	0	0	0	0	1	0	0	0		1	1	1	1	1	1	1	1	1	1	1	1	1	1	2	1	1	1		0.9176	0.379478	0.849979	0.921065	0.655136	0.406934	0.283286	0.61885	0.4884
lpg0963, lpg1148, lpg1907	3	3	0	0	0	0	0	1	1	0	0	0	0	0	0	0	0	1	0	0		1	1	1	1	1	2	2	1	1	1	1	1	1	1	1	2	1	1		0.9176	0.379478	0.849979	0.921065	0.655136	0.813868	0.566572	0.61885	0.4884
lpg0963, lpg1148, lpg1907, lpg2628	4	5	0	0	0	0	0	1	2	0	0	2	0	0	0	0	0	0	1	1		1	1	1	1	1	2	3	1	1	3	1	1	1	1	1	1	2	2		0.9176	0.379478	0.849979	0.921065	0.655136	0.813868	0.849858	0.61885	0.4884
lpg0963, lpg1148, lpg1907, lpg2628, lpg2692	5	9	0	0	0	0	0	2	15	7	2	4	0	0	0	0	1	4	2	5		1	1	1	1	1	3	16	8	3	5	1	1	1	1	2	5	3	6		0.9176	0.379478	0.849979	0.921065	0.655136	1.2208	4.53258	4.9508	1.4652
lpg0963, lpg1148, lpg1907, lpg2628, lpg2692, lpg2733	6	9	0	0	0	0	0	13	44	24	11	29	0	0	0	0	7	15	14	8		1	1	1	1	1	14	45	25	12	30	1	1	1	1	8	16	15	9		0.9176	0.379478	0.849979	0.921065	0.655136	5.69708	12.7479	15.4713	5.86081
lpg0963, lpg1148, lpg1907, lpg2628, lpg2733	5	9	0	0	0	0	0	4	6	4	1	4	0	0	0	0	1	2	3	1		1	1	1	1	1	5	7	5	2	5	1	1	1	1	2	3	4	2		0.9176	0.379478	0.849979	0.921065	0.655136	2.03467	1.983	3.09425	0.976801
lpg0963, lpg1148, lpg1907, lpg2692	4	3	0	0	0	0	0	0	2	0	0	1	0	0	0	0	0	0	0	2		1	1	1	1	1	1	3	1	1	2	1	1	1	1	1	1	1	3		0.9176	0.379478	0.849979	0.921065	0.655136	0.406934	0.849858	0.61885	0.4884
lpg0963, lpg1148, lpg1907, lpg2692, lpg2733	5	6	0	0	0	0	0	1	4	1	3	0	0	0	0	0	0	2	0	3		1	1	1	1	1	2	5	2	4	1	1	1	1	1	1	3	1	4		0.9176	0.379478	0.849979	0.921065	0.655136	0.813868	1.41643	1.2377	1.9536
lpg0963, lpg1148, lpg1907, lpg2733	4	7	0	0	0	0	0	1	3	1	1	1	0	0	0	0	0	3	1	0		1	1	1	1	1	2	4	2	2	2	1	1	1	1	1	4	2	1		0.9176	0.379478	0.849979	0.921065	0.655136	0.813868	1.13314	1.2377	0.976801
lpg0963, lpg1148, lpg2628	3	1	0	0	0	0	0	0	0	0	0	0	0	0	0	0	0	2	0	0		1	1	1	1	1	1	1	1	1	1	1	1	1	1	1	3	1	1		0.9176	0.379478	0.849979	0.921065	0.655136	0.406934	0.283286	0.61885	0.4884
lpg0963, lpg1148, lpg2628, lpg2692	4	2	0	0	0	0	0	0	0	0	0	0	0	0	0	0	0	1	0	1		1	1	1	1	1	1	1	1	1	1	1	1	1	1	1	2	1	2		0.9176	0.379478	0.849979	0.921065	0.655136	0.406934	0.283286	0.61885	0.4884
lpg0963, lpg1148, lpg2628, lpg2692, lpg2733	5	4	0	0	0	0	0	0	8	0	0	4	0	0	0	0	1	0	0	3		1	1	1	1	1	1	9	1	1	5	1	1	1	1	2	1	1	4		0.9176	0.379478	0.849979	0.921065	0.655136	0.406934	2.54958	0.61885	0.4884
lpg0963, lpg1148, lpg2628, lpg2733	4	1	0	0	0	0	0	0	1	0	0	0	0	0	0	0	0	0	0	0		1	1	1	1	1	1	2	1	1	1	1	1	1	1	1	1	1	1		0.9176	0.379478	0.849979	0.921065	0.655136	0.406934	0.566572	0.61885	0.4884
lpg0963, lpg1148, lpg2692	3	1	0	0	0	0	0	0	0	0	0	0	0	0	0	0	0	0	0	1		1	1	1	1	1	1	1	1	1	1	1	1	1	1	1	1	1	2		0.9176	0.379478	0.849979	0.921065	0.655136	0.406934	0.283286	0.61885	0.4884
lpg0963, lpg1148, lpg2692, lpg2733	4	1	0	0	0	0	0	0	0	0	0	0	0	0	0	0	0	2	0	0		1	1	1	1	1	1	1	1	1	1	1	1	1	1	1	3	1	1		0.9176	0.379478	0.849979	0.921065	0.655136	0.406934	0.283286	0.61885	0.4884
lpg0963, lpg1525	2	10	5	21	14	17	10	0	0	0	0	0	3	15	8	40	0	1	0	0		6	22	15	18	11	1	1	1	1	1	4	16	9	41	1	2	1	1		5.5056	8.34851	12.7497	16.5792	7.2065	0.406934	0.283286	0.61885	0.4884
lpg0963, lpg1525, lpg1701	3	4	0	0	0	0	0	2	0	1	0	1	0	0	0	0	0	0	2	0		1	1	1	1	1	3	1	2	1	2	1	1	1	1	1	1	3	1		0.9176	0.379478	0.849979	0.921065	0.655136	1.2208	0.283286	1.2377	0.4884
lpg0963, lpg1525, lpg1701, lpg1702	4	8	0	0	0	0	0	3	9	2	3	1	0	0	0	0	1	8	0	4		1	1	1	1	1	4	10	3	4	2	1	1	1	1	2	9	1	5		0.9176	0.379478	0.849979	0.921065	0.655136	1.62774	2.83286	1.85655	1.9536
lpg0963, lpg1525, lpg1702	3	3	0	0	0	0	0	0	2	0	0	0	0	0	0	0	0	2	1	0		1	1	1	1	1	1	3	1	1	1	1	1	1	1	1	3	2	1		0.9176	0.379478	0.849979	0.921065	0.655136	0.406934	0.849858	0.61885	0.4884
lpg0963, lpg1525, lpg2804, lpg2884	4	1	0	0	0	0	0	0	0	1	0	0	0	0	0	0	0	0	0	0		1	1	1	1	1	1	1	2	1	1	1	1	1	1	1	1	1	1		0.9176	0.379478	0.849979	0.921065	0.655136	0.406934	0.283286	1.2377	0.4884
lpg0963, lpg1527	2	9	0	0	0	0	0	33	26	13	25	30	0	0	0	0	18	29	13	25		1	1	1	1	1	34	27	14	26	31	1	1	1	1	19	30	14	26		0.9176	0.379478	0.849979	0.921065	0.655136	13.8358	7.64873	8.6639	12.6984
lpg0963, lpg1527, lpg1661, lpg2804, lpg2884, lpg2885	6	1	0	0	0	0	0	0	0	0	0	0	0	0	0	0	0	0	0	1		1	1	1	1	1	1	1	1	1	1	1	1	1	1	1	1	1	2		0.9176	0.379478	0.849979	0.921065	0.655136	0.406934	0.283286	0.61885	0.4884
lpg0963, lpg1527, lpg1701	3	6	0	0	0	0	0	1	1	2	1	1	0	0	0	0	0	1	0	0		1	1	1	1	1	2	2	3	2	2	1	1	1	1	1	2	1	1		0.9176	0.379478	0.849979	0.921065	0.655136	0.813868	0.566572	1.85655	0.976801
lpg0963, lpg1527, lpg1701, lpg2223	4	6	0	0	0	0	0	2	7	2	0	5	0	0	0	0	2	3	0	0		1	1	1	1	1	3	8	3	1	6	1	1	1	1	3	4	1	1		0.9176	0.379478	0.849979	0.921065	0.655136	1.2208	2.26629	1.85655	0.4884
lpg0963, lpg1527, lpg1701, lpg2244, lpg2804, lpg2884	6	1	0	0	0	0	0	1	0	0	0	0	0	0	0	0	0	0	0	0		1	1	1	1	1	2	1	1	1	1	1	1	1	1	1	1	1	1		0.9176	0.379478	0.849979	0.921065	0.655136	0.813868	0.283286	0.61885	0.4884
lpg0963, lpg1527, lpg2223	3	5	0	0	0	0	0	1	0	0	2	0	0	0	0	0	1	1	0	1		1	1	1	1	1	2	1	1	3	1	1	1	1	1	2	2	1	2		0.9176	0.379478	0.849979	0.921065	0.655136	0.813868	0.283286	0.61885	1.4652
lpg0963, lpg1527, lpg2223, lpg2244, lpg2884	5	1	0	0	0	0	0	0	0	0	0	0	0	0	0	0	0	0	0	1		1	1	1	1	1	1	1	1	1	1	1	1	1	1	1	1	1	2		0.9176	0.379478	0.849979	0.921065	0.655136	0.406934	0.283286	0.61885	0.4884
lpg0963, lpg1527, lpg2223, lpg2692, lpg2804, lpg2884, lpg3000	7	1	0	0	0	0	0	0	0	0	0	0	0	0	0	0	0	0	1	0		1	1	1	1	1	1	1	1	1	1	1	1	1	1	1	1	2	1		0.9176	0.379478	0.849979	0.921065	0.655136	0.406934	0.283286	0.61885	0.4884
lpg0963, lpg1527, lpg2552, lpg2884	4	1	0	0	1	0	0	0	0	0	0	0	0	0	0	0	0	0	0	0		1	1	2	1	1	1	1	1	1	1	1	1	1	1	1	1	1	1		0.9176	0.379478	1.69996	0.921065	0.655136	0.406934	0.283286	0.61885	0.4884
lpg0963, lpg1527, lpg2584, lpg2804, lpg2884	5	1	0	0	0	0	0	1	0	0	0	0	0	0	0	0	0	0	0	0		1	1	1	1	1	2	1	1	1	1	1	1	1	1	1	1	1	1		0.9176	0.379478	0.849979	0.921065	0.655136	0.813868	0.283286	0.61885	0.4884
lpg0963, lpg1527, lpg2584, lpg2804, lpg2884, lpg2885	6	1	0	0	0	0	0	0	0	0	0	0	0	0	0	0	0	0	1	0		1	1	1	1	1	1	1	1	1	1	1	1	1	1	1	1	2	1		0.9176	0.379478	0.849979	0.921065	0.655136	0.406934	0.283286	0.61885	0.4884
lpg0963, lpg1527, lpg2584, lpg2884, lpg2885	5	1	0	0	0	0	0	0	0	0	0	0	0	0	0	0	0	0	0	1		1	1	1	1	1	1	1	1	1	1	1	1	1	1	1	1	1	2		0.9176	0.379478	0.849979	0.921065	0.655136	0.406934	0.283286	0.61885	0.4884
lpg0963, lpg1527, lpg2692, lpg2804, lpg2884	5	1	0	0	0	0	0	0	0	0	0	0	0	0	0	0	0	0	0	1		1	1	1	1	1	1	1	1	1	1	1	1	1	1	1	1	1	2		0.9176	0.379478	0.849979	0.921065	0.655136	0.406934	0.283286	0.61885	0.4884
lpg0963, lpg1527, lpg2804	3	10	0	0	0	0	0	115	95	32	90	59	0	0	1	0	62	90	54	58		1	1	1	1	1	116	96	33	91	60	1	1	2	1	63	91	55	59		0.9176	0.379478	0.849979	0.921065	0.655136	47.2044	27.1955	20.4221	44.4444
lpg0963, lpg1527, lpg2804, lpg2884	4	10	0	0	0	0	0	786	490	273	584	449	0	0	7	0	574	773	477	464		1	1	1	1	1	787	491	274	585	450	1	1	8	1	575	774	478	465		0.9176	0.379478	0.849979	0.921065	0.655136	320.257	139.093	169.565	285.714
lpg0963, lpg1527, lpg2884	3	9	0	0	0	0	0	111	68	32	73	58	0	0	0	0	62	88	33	50		1	1	1	1	1	112	69	33	74	59	1	1	1	1	63	89	34	51		0.9176	0.379478	0.849979	0.921065	0.655136	45.5766	19.5467	20.4221	36.1416
lpg0963, lpg1621	2	6	0	0	0	0	0	2	0	0	6	0	0	0	0	0	2	5	7	4		1	1	1	1	1	3	1	1	7	1	1	1	1	1	3	6	8	5		0.9176	0.379478	0.849979	0.921065	0.655136	1.2208	0.283286	0.61885	3.4188
lpg0963, lpg1621, lpg1701, lpg2223, lpg2584, lpg2815	6	1	0	0	0	0	0	0	0	0	1	0	0	0	0	0	0	0	0	0		1	1	1	1	1	1	1	1	2	1	1	1	1	1	1	1	1	1		0.9176	0.379478	0.849979	0.921065	0.655136	0.406934	0.283286	0.61885	0.976801
lpg0963, lpg1621, lpg2584	3	6	0	0	0	0	0	14	0	0	19	0	0	0	0	0	8	21	8	11		1	1	1	1	1	15	1	1	20	1	1	1	1	1	9	22	9	12		0.9176	0.379478	0.849979	0.921065	0.655136	6.10401	0.283286	0.61885	9.76801
lpg0963, lpg1621, lpg2584, lpg2815	4	7	0	0	0	0	0	53	0	0	50	0	0	0	2	0	33	73	30	40		1	1	1	1	1	54	1	1	51	1	1	1	3	1	34	74	31	41		0.9176	0.379478	0.849979	0.921065	0.655136	21.9744	0.283286	0.61885	24.9084
lpg0963, lpg1621, lpg2815	3	6	0	0	0	0	0	4	0	0	11	0	0	0	0	0	8	9	2	6		1	1	1	1	1	5	1	1	12	1	1	1	1	1	9	10	3	7		0.9176	0.379478	0.849979	0.921065	0.655136	2.03467	0.283286	0.61885	5.86081
lpg0963, lpg1661	2	8	0	0	0	0	0	1	11	3	2	5	0	0	0	0	3	5	0	2		1	1	1	1	1	2	12	4	3	6	1	1	1	1	4	6	1	3		0.9176	0.379478	0.849979	0.921065	0.655136	0.813868	3.39943	2.4754	1.4652
lpg0963, lpg1661, lpg1907	3	9	0	0	0	0	0	33	72	43	20	37	0	0	0	0	25	59	12	35		1	1	1	1	1	34	73	44	21	38	1	1	1	1	26	60	13	36		0.9176	0.379478	0.849979	0.921065	0.655136	13.8358	20.6799	27.2294	10.2564
lpg0963, lpg1701	2	8	0	0	0	0	0	4	11	4	0	7	0	0	0	0	2	3	1	2		1	1	1	1	1	5	12	5	1	8	1	1	1	1	3	4	2	3		0.9176	0.379478	0.849979	0.921065	0.655136	2.03467	3.39943	3.09425	0.4884
lpg0963, lpg1701, lpg1702	3	7	0	0	0	0	0	2	5	2	0	0	0	0	0	0	2	4	1	1		1	1	1	1	1	3	6	3	1	1	1	1	1	1	3	5	2	2		0.9176	0.379478	0.849979	0.921065	0.655136	1.2208	1.69972	1.85655	0.4884
lpg0963, lpg1701, lpg1907	3	9	0	0	0	0	0	4	34	9	6	13	0	0	0	0	4	13	3	7		1	1	1	1	1	5	35	10	7	14	1	1	1	1	5	14	4	8		0.9176	0.379478	0.849979	0.921065	0.655136	2.03467	9.91501	6.1885	3.4188
lpg0963, lpg1701, lpg2223	3	4	0	0	0	0	0	0	4	0	2	5	0	0	0	0	0	1	0	0		1	1	1	1	1	1	5	1	3	6	1	1	1	1	1	2	1	1		0.9176	0.379478	0.849979	0.921065	0.655136	0.406934	1.41643	0.61885	1.4652
lpg0963, lpg1702	2	9	0	0	0	0	0	3	10	6	4	7	0	0	1	0	1	6	0	3		1	1	1	1	1	4	11	7	5	8	1	1	2	1	2	7	1	4		0.9176	0.379478	0.849979	0.921065	0.655136	1.62774	3.11615	4.33195	2.442
lpg0963, lpg1702, lpg2584, lpg2885	4	1	0	0	0	0	0	0	0	1	0	0	0	0	0	0	0	0	0	0		1	1	1	1	1	1	1	2	1	1	1	1	1	1	1	1	1	1		0.9176	0.379478	0.849979	0.921065	0.655136	0.406934	0.283286	1.2377	0.4884
lpg0963, lpg1776, lpg2552	3	1	0	0	0	0	0	0	0	0	0	0	0	0	1	0	0	0	0	0		1	1	1	1	1	1	1	1	1	1	1	1	2	1	1	1	1	1		0.9176	0.379478	0.849979	0.921065	0.655136	0.406934	0.283286	0.61885	0.4884
lpg0963, lpg1776, lpg2806	3	1	0	1	0	0	0	0	0	0	0	0	0	0	0	0	0	0	0	0		1	2	1	1	1	1	1	1	1	1	1	1	1	1	1	1	1	1		0.9176	0.758956	0.849979	0.921065	0.655136	0.406934	0.283286	0.61885	0.4884
lpg0963, lpg1907	2	12	1	3	0	1	0	7	35	12	11	11	0	0	0	0	3	15	3	9		2	4	1	2	1	8	36	13	12	12	1	1	1	1	4	16	4	10		1.8352	1.51791	0.849979	1.84213	0.655136	3.25547	10.1983	8.04505	5.86081
lpg0963, lpg1907, lpg2223	3	8	2	6	2	1	1	0	0	0	0	0	0	2	2	5	0	0	0	0		3	7	3	2	2	1	1	1	1	1	1	3	3	6	1	1	1	1		2.7528	2.65634	2.54994	1.84213	1.31027	0.406934	0.283286	0.61885	0.4884
lpg0963, lpg1907, lpg2223, lpg2244	4	9	4	33	25	15	15	0	0	0	0	0	5	20	15	39	0	0	0	0		5	34	26	16	16	1	1	1	1	1	6	21	16	40	1	1	1	1		4.588	12.9022	22.0994	14.737	10.4822	0.406934	0.283286	0.61885	0.4884
lpg0963, lpg1907, lpg2244	3	8	1	1	0	2	3	0	0	0	0	0	1	1	1	1	0	0	0	0		2	2	1	3	4	1	1	1	1	1	2	2	2	2	1	1	1	1		1.8352	0.758956	0.849979	2.76319	2.62055	0.406934	0.283286	0.61885	0.4884
lpg0963, lpg1907, lpg2271	3	10	0	0	0	0	0	20	72	29	16	44	0	0	1	0	6	21	1	10		1	1	1	1	1	21	73	30	17	45	1	1	2	1	7	22	2	11		0.9176	0.379478	0.849979	0.921065	0.655136	8.54562	20.6799	18.5655	8.30281
lpg0963, lpg1907, lpg2628	3	2	0	0	0	0	0	1	0	0	0	0	0	0	0	0	0	0	0	1		1	1	1	1	1	2	1	1	1	1	1	1	1	1	1	1	1	2		0.9176	0.379478	0.849979	0.921065	0.655136	0.813868	0.283286	0.61885	0.4884
lpg0963, lpg1907, lpg2628, lpg2692	4	5	0	0	0	0	0	0	5	1	0	1	0	0	0	0	0	0	1	1		1	1	1	1	1	1	6	2	1	2	1	1	1	1	1	1	2	2		0.9176	0.379478	0.849979	0.921065	0.655136	0.406934	1.69972	1.2377	0.4884
lpg0963, lpg1907, lpg2628, lpg2692, lpg2733	5	6	0	0	0	0	0	0	2	2	1	1	0	0	0	0	1	3	0	0		1	1	1	1	1	1	3	3	2	2	1	1	1	1	2	4	1	1		0.9176	0.379478	0.849979	0.921065	0.655136	0.406934	0.849858	1.85655	0.976801
lpg0963, lpg1907, lpg2628, lpg2733	4	2	0	0	0	0	0	1	0	0	0	2	0	0	0	0	0	0	0	0		1	1	1	1	1	2	1	1	1	3	1	1	1	1	1	1	1	1		0.9176	0.379478	0.849979	0.921065	0.655136	0.813868	0.283286	0.61885	0.4884
lpg0963, lpg1907, lpg2692	3	1	0	0	0	0	0	0	0	0	0	1	0	0	0	0	0	0	0	0		1	1	1	1	1	1	1	1	1	2	1	1	1	1	1	1	1	1		0.9176	0.379478	0.849979	0.921065	0.655136	0.406934	0.283286	0.61885	0.4884
lpg0963, lpg1907, lpg2692, lpg2733	4	1	0	0	0	0	0	0	0	0	0	0	0	0	0	0	0	0	1	0		1	1	1	1	1	1	1	1	1	1	1	1	1	1	1	1	2	1		0.9176	0.379478	0.849979	0.921065	0.655136	0.406934	0.283286	0.61885	0.4884
lpg0963, lpg1907, lpg2733	3	3	1	0	0	2	0	0	0	0	0	1	0	0	0	0	0	0	0	0		2	1	1	3	1	1	1	1	1	2	1	1	1	1	1	1	1	1		1.8352	0.379478	0.849979	2.76319	0.655136	0.406934	0.283286	0.61885	0.4884
lpg0963, lpg1907, lpg2733, lpg3000	4	6	6	3	0	1	0	0	0	0	0	0	9	0	2	3	0	0	0	0		7	4	1	2	1	1	1	1	1	1	10	1	3	4	1	1	1	1		6.4232	1.51791	0.849979	1.84213	0.655136	0.406934	0.283286	0.61885	0.4884
lpg0963, lpg1907, lpg3000	3	2	2	0	0	0	0	0	0	0	0	0	1	0	0	0	0	0	0	0		3	1	1	1	1	1	1	1	1	1	2	1	1	1	1	1	1	1		2.7528	0.379478	0.849979	0.921065	0.655136	0.406934	0.283286	0.61885	0.4884
lpg0963, lpg1959, lpg2223, lpg2552, lpg2584, lpg2888, lpg3000	7	1	0	0	0	0	0	0	0	0	0	0	0	0	0	1	0	0	0	0		1	1	1	1	1	1	1	1	1	1	1	1	1	2	1	1	1	1		0.9176	0.379478	0.849979	0.921065	0.655136	0.406934	0.283286	0.61885	0.4884
lpg0963, lpg1959, lpg2244	3	3	0	0	1	1	0	0	0	0	0	0	1	0	0	0	0	0	0	0		1	1	2	2	1	1	1	1	1	1	2	1	1	1	1	1	1	1		0.9176	0.379478	1.69996	1.84213	0.655136	0.406934	0.283286	0.61885	0.4884
lpg0963, lpg1959, lpg2244, lpg2804	4	7	0	6	4	3	0	0	0	0	0	0	2	2	2	5	0	0	0	0		1	7	5	4	1	1	1	1	1	1	3	3	3	6	1	1	1	1		0.9176	2.65634	4.24989	3.68426	0.655136	0.406934	0.283286	0.61885	0.4884
lpg0963, lpg1959, lpg2804	3	2	0	2	1	0	0	0	0	0	0	0	0	0	0	0	0	0	0	0		1	3	2	1	1	1	1	1	1	1	1	1	1	1	1	1	1	1		0.9176	1.13843	1.69996	0.921065	0.655136	0.406934	0.283286	0.61885	0.4884
lpg0963, lpg1959, lpg3000	3	4	0	1	3	0	3	0	0	0	0	0	0	0	0	1	0	0	0	0		1	2	4	1	4	1	1	1	1	1	1	1	1	2	1	1	1	1		0.9176	0.758956	3.39992	0.921065	2.62055	0.406934	0.283286	0.61885	0.4884
lpg0963, lpg2223	2	11	18	8	1	6	0	0	3	0	0	0	9	2	12	4	1	1	0	0		19	9	2	7	1	1	4	1	1	1	10	3	13	5	2	2	1	1		17.4344	3.4153	1.69996	6.44745	0.655136	0.406934	1.13314	0.61885	0.4884
lpg0963, lpg2223, lpg2244	3	9	1	5	2	1	1	0	0	0	0	0	3	1	1	3	0	0	0	0		2	6	3	2	2	1	1	1	1	1	4	2	2	4	1	1	1	1		1.8352	2.27687	2.54994	1.84213	1.31027	0.406934	0.283286	0.61885	0.4884
lpg0963, lpg2223, lpg2552	3	9	74	13	4	28	1	0	0	0	0	0	78	9	40	6	0	0	0	0		75	14	5	29	2	1	1	1	1	1	79	10	41	7	1	1	1	1		68.82	5.31269	4.24989	26.7109	1.31027	0.406934	0.283286	0.61885	0.4884
lpg0963, lpg2223, lpg2552, lpg2692, lpg2888	5	1	0	1	0	0	0	0	0	0	0	0	0	0	0	0	0	0	0	0		1	2	1	1	1	1	1	1	1	1	1	1	1	1	1	1	1	1		0.9176	0.758956	0.849979	0.921065	0.655136	0.406934	0.283286	0.61885	0.4884
lpg0963, lpg2223, lpg2552, lpg2692, lpg2888, lpg3000	6	4	0	1	0	2	0	0	0	0	0	0	0	0	3	1	0	0	0	0		1	2	1	3	1	1	1	1	1	1	1	1	4	2	1	1	1	1		0.9176	0.758956	0.849979	2.76319	0.655136	0.406934	0.283286	0.61885	0.4884
lpg0963, lpg2223, lpg2552, lpg2692, lpg3000	5	2	0	0	0	0	1	0	0	0	0	0	0	0	1	0	0	0	0	0		1	1	1	1	2	1	1	1	1	1	1	1	2	1	1	1	1	1		0.9176	0.379478	0.849979	0.921065	1.31027	0.406934	0.283286	0.61885	0.4884
lpg0963, lpg2223, lpg2552, lpg2815, lpg2888, lpg3000	6	2	1	0	0	0	0	0	0	0	0	0	0	0	1	0	0	0	0	0		2	1	1	1	1	1	1	1	1	1	1	1	2	1	1	1	1	1		1.8352	0.379478	0.849979	0.921065	0.655136	0.406934	0.283286	0.61885	0.4884
lpg0963, lpg2223, lpg2552, lpg2888	4	9	239	58	5	124	15	0	0	0	0	0	300	33	192	29	0	0	0	0		240	59	6	125	16	1	1	1	1	1	301	34	193	30	1	1	1	1		220.224	22.3892	5.09987	115.133	10.4822	0.406934	0.283286	0.61885	0.4884
lpg0963, lpg2223, lpg2552, lpg2888, lpg3000	5	11	2212	386	169	1635	204	0	0	0	0	0	3015	238	2126	301	0	1	5	0		2213	387	170	1636	205	1	1	1	1	1	3016	239	2127	302	1	2	6	1		2030.65	146.858	144.496	1506.86	134.303	0.406934	0.283286	0.61885	0.4884
lpg0963, lpg2223, lpg2552, lpg3000	4	10	201	46	20	94	19	0	0	0	0	0	212	21	160	26	0	0	1	0		202	47	21	95	20	1	1	1	1	1	213	22	161	27	1	1	2	1		185.355	17.8355	17.8496	87.5012	13.1027	0.406934	0.283286	0.61885	0.4884
lpg0963, lpg2223, lpg2815	3	1	0	0	0	0	0	0	0	0	0	0	0	0	1	0	0	0	0	0		1	1	1	1	1	1	1	1	1	1	1	1	2	1	1	1	1	1		0.9176	0.379478	0.849979	0.921065	0.655136	0.406934	0.283286	0.61885	0.4884
lpg0963, lpg2223, lpg2815, lpg2888, lpg3000	5	2	0	0	0	1	0	0	0	0	0	0	0	0	0	1	0	0	0	0		1	1	1	2	1	1	1	1	1	1	1	1	1	2	1	1	1	1		0.9176	0.379478	0.849979	1.84213	0.655136	0.406934	0.283286	0.61885	0.4884
lpg0963, lpg2223, lpg2885	3	1	0	0	0	0	0	0	0	0	0	0	0	0	0	1	0	0	0	0		1	1	1	1	1	1	1	1	1	1	1	1	1	2	1	1	1	1		0.9176	0.379478	0.849979	0.921065	0.655136	0.406934	0.283286	0.61885	0.4884
lpg0963, lpg2223, lpg2888	3	9	40	12	4	23	5	0	0	0	0	0	64	5	40	9	0	0	0	0		41	13	5	24	6	1	1	1	1	1	65	6	41	10	1	1	1	1		37.6216	4.93321	4.24989	22.1056	3.93082	0.406934	0.283286	0.61885	0.4884
lpg0963, lpg2223, lpg2888, lpg3000	4	9	233	36	14	142	19	0	0	0	0	0	296	25	228	28	0	0	0	0		234	37	15	143	20	1	1	1	1	1	297	26	229	29	1	1	1	1		214.718	14.0407	12.7497	131.712	13.1027	0.406934	0.283286	0.61885	0.4884
lpg0963, lpg2223, lpg3000	3	10	16	3	2	14	3	0	0	0	0	0	39	5	24	2	0	0	1	0		17	4	3	15	4	1	1	1	1	1	40	6	25	3	1	1	2	1		15.5992	1.51791	2.54994	13.816	2.62055	0.406934	0.283286	0.61885	0.4884
lpg0963, lpg2244	2	7	2	3	4	1	1	0	0	0	0	0	1	0	0	2	0	0	0	0		3	4	5	2	2	1	1	1	1	1	2	1	1	3	1	1	1	1		2.7528	1.51791	4.24989	1.84213	1.31027	0.406934	0.283286	0.61885	0.4884
lpg0963, lpg2244, lpg2804	3	1	0	1	0	0	0	0	0	0	0	0	0	0	0	0	0	0	0	0		1	2	1	1	1	1	1	1	1	1	1	1	1	1	1	1	1	1		0.9176	0.758956	0.849979	0.921065	0.655136	0.406934	0.283286	0.61885	0.4884
lpg0963, lpg2271	2	9	0	0	0	0	0	2	7	1	2	6	0	0	0	0	2	4	1	6		1	1	1	1	1	3	8	2	3	7	1	1	1	1	3	5	2	7		0.9176	0.379478	0.849979	0.921065	0.655136	1.2208	2.26629	1.2377	1.4652
lpg0963, lpg2552	2	18	334	2049	938	228	1451	36	84	25	26	38	366	794	515	399	25	41	12	21		335	2050	939	229	1452	37	85	26	27	39	367	795	516	400	26	42	13	22		307.396	777.93	798.13	210.924	951.258	15.0566	24.0793	16.0901	13.1868
lpg0963, lpg2552, lpg2692	3	4	0	0	1	0	3	0	0	0	0	0	0	1	2	0	0	0	0	0		1	1	2	1	4	1	1	1	1	1	1	2	3	1	1	1	1	1		0.9176	0.379478	1.69996	0.921065	2.62055	0.406934	0.283286	0.61885	0.4884
lpg0963, lpg2552, lpg2888	3	9	37	12	3	18	2	0	0	0	0	0	42	4	31	3	0	0	0	0		38	13	4	19	3	1	1	1	1	1	43	5	32	4	1	1	1	1		34.8688	4.93321	3.39992	17.5002	1.96541	0.406934	0.283286	0.61885	0.4884
lpg0963, lpg2552, lpg2888, lpg3000	4	10	178	34	9	72	17	0	0	0	0	0	205	19	151	23	0	0	1	0		179	35	10	73	18	1	1	1	1	1	206	20	152	24	1	1	2	1		164.25	13.2817	8.49979	67.2377	11.7925	0.406934	0.283286	0.61885	0.4884
lpg0963, lpg2552, lpg3000	3	8	26	3	0	14	2	0	0	0	0	0	41	2	26	4	0	0	0	0		27	4	1	15	3	1	1	1	1	1	42	3	27	5	1	1	1	1		24.7752	1.51791	0.849979	13.816	1.96541	0.406934	0.283286	0.61885	0.4884
lpg0963, lpg2584	2	5	0	0	0	0	0	2	0	0	0	0	0	0	1	0	2	3	1	0		1	1	1	1	1	3	1	1	1	1	1	1	2	1	3	4	2	1		0.9176	0.379478	0.849979	0.921065	0.655136	1.2208	0.283286	0.61885	0.4884
lpg0963, lpg2584, lpg2815	3	6	0	0	0	0	0	5	0	0	8	0	0	0	0	0	1	8	1	1		1	1	1	1	1	6	1	1	9	1	1	1	1	1	2	9	2	2		0.9176	0.379478	0.849979	0.921065	0.655136	2.4416	0.283286	0.61885	4.3956
lpg0963, lpg2628	2	1	0	0	0	0	0	1	0	0	0	0	0	0	0	0	0	0	0	0		1	1	1	1	1	2	1	1	1	1	1	1	1	1	1	1	1	1		0.9176	0.379478	0.849979	0.921065	0.655136	0.813868	0.283286	0.61885	0.4884
lpg0963, lpg2628, lpg2692, lpg2733	4	1	0	0	0	0	0	0	0	0	0	0	0	0	0	0	0	0	0	1		1	1	1	1	1	1	1	1	1	1	1	1	1	1	1	1	1	2		0.9176	0.379478	0.849979	0.921065	0.655136	0.406934	0.283286	0.61885	0.4884
lpg0963, lpg2692, lpg2804, lpg2884	4	1	0	0	0	0	0	0	0	0	0	0	0	0	0	0	0	0	0	1		1	1	1	1	1	1	1	1	1	1	1	1	1	1	1	1	1	2		0.9176	0.379478	0.849979	0.921065	0.655136	0.406934	0.283286	0.61885	0.4884
lpg0963, lpg2733, lpg3000	3	1	0	0	0	1	0	0	0	0	0	0	0	0	0	0	0	0	0	0		1	1	1	2	1	1	1	1	1	1	1	1	1	1	1	1	1	1		0.9176	0.379478	0.849979	1.84213	0.655136	0.406934	0.283286	0.61885	0.4884
lpg0963, lpg2804	2	9	0	0	0	0	0	46	27	11	36	25	0	0	0	0	23	40	13	15		1	1	1	1	1	47	28	12	37	26	1	1	1	1	24	41	14	16		0.9176	0.379478	0.849979	0.921065	0.655136	19.1259	7.93201	7.4262	18.0708
lpg0963, lpg2804, lpg2884	3	10	0	0	0	0	0	154	96	41	108	79	0	0	1	0	92	129	65	76		1	1	1	1	1	155	97	42	109	80	1	1	2	1	93	130	66	77		0.9176	0.379478	0.849979	0.921065	0.655136	63.0748	27.4788	25.9917	53.2357
lpg0963, lpg2815	2	3	0	0	0	0	0	1	0	0	1	0	0	0	0	0	1	0	0	0		1	1	1	1	1	2	1	1	2	1	1	1	1	1	2	1	1	1		0.9176	0.379478	0.849979	0.921065	0.655136	0.813868	0.283286	0.61885	0.976801
lpg0963, lpg2884	2	9	0	0	0	0	0	40	38	9	28	18	0	0	0	0	25	43	27	28		1	1	1	1	1	41	39	10	29	19	1	1	1	1	26	44	28	29		0.9176	0.379478	0.849979	0.921065	0.655136	16.6843	11.0482	6.1885	14.1636
lpg0963, lpg2885	2	1	0	0	0	0	0	0	0	0	0	0	0	0	0	1	0	0	0	0		1	1	1	1	1	1	1	1	1	1	1	1	1	2	1	1	1	1		0.9176	0.379478	0.849979	0.921065	0.655136	0.406934	0.283286	0.61885	0.4884
lpg0963, lpg2888	2	9	20	4	1	3	2	0	0	0	0	0	14	1	18	2	0	0	0	0		21	5	2	4	3	1	1	1	1	1	15	2	19	3	1	1	1	1		19.2696	1.89739	1.69996	3.68426	1.96541	0.406934	0.283286	0.61885	0.4884
lpg0963, lpg2888, lpg3000	3	9	42	11	3	24	7	0	0	0	0	0	69	6	44	5	0	0	0	0		43	12	4	25	8	1	1	1	1	1	70	7	45	6	1	1	1	1		39.4568	4.55373	3.39992	23.0266	5.24109	0.406934	0.283286	0.61885	0.4884
lpg0963, lpg3000	2	9	7	8	3	4	1	0	0	0	0	0	10	1	9	1	0	0	0	0		8	9	4	5	2	1	1	1	1	1	11	2	10	2	1	1	1	1		7.3408	3.4153	3.39992	4.60532	1.31027	0.406934	0.283286	0.61885	0.4884
lpg1099	1	18	23	124	55	18	108	23	29	18	12	29	25	22	27	19	11	17	11	12		24	125	56	19	109	24	30	19	13	30	26	23	28	20	12	18	12	13		22.0224	47.4347	47.5988	17.5002	71.4099	9.76642	8.49858	11.7582	6.34921
lpg1099, lpg1137	2	1	0	1	0	0	0	0	0	0	0	0	0	0	0	0	0	0	0	0		1	2	1	1	1	1	1	1	1	1	1	1	1	1	1	1	1	1		0.9176	0.758956	0.849979	0.921065	0.655136	0.406934	0.283286	0.61885	0.4884
lpg1099, lpg1137, lpg1527, lpg1959	4	3	0	2	0	0	0	0	0	0	0	0	0	0	4	7	0	0	0	0		1	3	1	1	1	1	1	1	1	1	1	1	5	8	1	1	1	1		0.9176	1.13843	0.849979	0.921065	0.655136	0.406934	0.283286	0.61885	0.4884
lpg1099, lpg1137, lpg1527, lpg1959, lpg2733	5	7	3	6	0	4	1	0	0	0	0	0	1	0	1	24	0	0	0	0		4	7	1	5	2	1	1	1	1	1	2	1	2	25	1	1	1	1		3.6704	2.65634	0.849979	4.60532	1.31027	0.406934	0.283286	0.61885	0.4884
lpg1099, lpg1137, lpg1527, lpg2733	4	4	0	1	1	0	0	0	0	0	0	0	0	1	0	1	0	0	0	0		1	2	2	1	1	1	1	1	1	1	1	2	1	2	1	1	1	1		0.9176	0.758956	1.69996	0.921065	0.655136	0.406934	0.283286	0.61885	0.4884
lpg1099, lpg1137, lpg1959	3	1	0	1	0	0	0	0	0	0	0	0	0	0	0	0	0	0	0	0		1	2	1	1	1	1	1	1	1	1	1	1	1	1	1	1	1	1		0.9176	0.758956	0.849979	0.921065	0.655136	0.406934	0.283286	0.61885	0.4884
lpg1099, lpg1137, lpg1959, lpg2733	4	3	0	2	0	0	0	0	0	0	0	0	0	1	0	3	0	0	0	0		1	3	1	1	1	1	1	1	1	1	1	2	1	4	1	1	1	1		0.9176	1.13843	0.849979	0.921065	0.655136	0.406934	0.283286	0.61885	0.4884
lpg1099, lpg1137, lpg2584	3	1	0	0	0	0	0	0	0	0	0	0	1	0	0	0	0	0	0	0		1	1	1	1	1	1	1	1	1	1	2	1	1	1	1	1	1	1		0.9176	0.379478	0.849979	0.921065	0.655136	0.406934	0.283286	0.61885	0.4884
lpg1099, lpg1148	2	9	0	0	0	0	0	23	39	23	23	28	0	0	0	0	16	31	12	17		1	1	1	1	1	24	40	24	24	29	1	1	1	1	17	32	13	18		0.9176	0.379478	0.849979	0.921065	0.655136	9.76642	11.3314	14.8524	11.7216
lpg1099, lpg1148, lpg1661, lpg1702, lpg2223, lpg2804, lpg2884, lpg2885	8	1	0	0	0	0	0	0	1	0	0	0	0	0	0	0	0	0	0	0		1	1	1	1	1	1	2	1	1	1	1	1	1	1	1	1	1	1		0.9176	0.379478	0.849979	0.921065	0.655136	0.406934	0.566572	0.61885	0.4884
lpg1099, lpg1148, lpg1661, lpg1702, lpg2804, lpg2884	6	1	0	0	0	0	0	0	0	0	0	0	0	0	0	0	0	0	0	1		1	1	1	1	1	1	1	1	1	1	1	1	1	1	1	1	1	2		0.9176	0.379478	0.849979	0.921065	0.655136	0.406934	0.283286	0.61885	0.4884
lpg1099, lpg1148, lpg1661, lpg1702, lpg2804, lpg2884, lpg2885	7	8	0	0	0	0	0	5	2	1	0	2	0	0	0	0	9	4	5	4		1	1	1	1	1	6	3	2	1	3	1	1	1	1	10	5	6	5		0.9176	0.379478	0.849979	0.921065	0.655136	2.4416	0.849858	1.2377	0.4884
lpg1099, lpg1148, lpg1661, lpg1702, lpg2804, lpg2885	6	1	0	0	0	0	0	0	0	0	0	0	0	0	0	0	1	0	0	0		1	1	1	1	1	1	1	1	1	1	1	1	1	1	2	1	1	1		0.9176	0.379478	0.849979	0.921065	0.655136	0.406934	0.283286	0.61885	0.4884
lpg1099, lpg1148, lpg1661, lpg1702, lpg2884, lpg2885	6	3	0	0	0	0	0	1	0	0	1	0	0	0	0	0	0	0	0	1		1	1	1	1	1	2	1	1	2	1	1	1	1	1	1	1	1	2		0.9176	0.379478	0.849979	0.921065	0.655136	0.813868	0.283286	0.61885	0.976801
lpg1099, lpg1148, lpg1661, lpg1702, lpg2885	5	1	0	0	0	0	0	0	0	0	1	0	0	0	0	0	0	0	0	0		1	1	1	1	1	1	1	1	2	1	1	1	1	1	1	1	1	1		0.9176	0.379478	0.849979	0.921065	0.655136	0.406934	0.283286	0.61885	0.976801
lpg1099, lpg1148, lpg1661, lpg2804, lpg2884, lpg2885	6	1	0	0	0	0	0	0	0	0	0	0	0	0	0	0	0	0	1	0		1	1	1	1	1	1	1	1	1	1	1	1	1	1	1	1	2	1		0.9176	0.379478	0.849979	0.921065	0.655136	0.406934	0.283286	0.61885	0.4884
lpg1099, lpg1148, lpg1702, lpg2804, lpg2884	5	1	0	0	0	0	0	0	0	0	1	0	0	0	0	0	0	0	0	0		1	1	1	1	1	1	1	1	2	1	1	1	1	1	1	1	1	1		0.9176	0.379478	0.849979	0.921065	0.655136	0.406934	0.283286	0.61885	0.976801
lpg1099, lpg1148, lpg1702, lpg2804, lpg2884, lpg2885	6	4	0	0	0	0	0	1	1	0	1	0	0	0	0	0	1	0	0	0		1	1	1	1	1	2	2	1	2	1	1	1	1	1	2	1	1	1		0.9176	0.379478	0.849979	0.921065	0.655136	0.813868	0.566572	0.61885	0.976801
lpg1099, lpg1148, lpg1702, lpg2804, lpg2885	5	1	0	0	0	0	0	0	0	0	0	0	0	0	0	0	0	0	0	1		1	1	1	1	1	1	1	1	1	1	1	1	1	1	1	1	1	2		0.9176	0.379478	0.849979	0.921065	0.655136	0.406934	0.283286	0.61885	0.4884
lpg1099, lpg1148, lpg1702, lpg2884, lpg2885	5	1	0	0	0	0	0	0	1	0	0	0	0	0	0	0	0	0	0	0		1	1	1	1	1	1	2	1	1	1	1	1	1	1	1	1	1	1		0.9176	0.379478	0.849979	0.921065	0.655136	0.406934	0.566572	0.61885	0.4884
lpg1099, lpg1148, lpg2552, lpg2885	4	1	0	0	0	0	0	0	0	1	0	0	0	0	0	0	0	0	0	0		1	1	1	1	1	1	1	2	1	1	1	1	1	1	1	1	1	1		0.9176	0.379478	0.849979	0.921065	0.655136	0.406934	0.283286	1.2377	0.4884
lpg1099, lpg1148, lpg2804, lpg2884, lpg2885	5	1	0	0	0	0	0	0	0	1	0	0	0	0	0	0	0	0	0	0		1	1	1	1	1	1	1	2	1	1	1	1	1	1	1	1	1	1		0.9176	0.379478	0.849979	0.921065	0.655136	0.406934	0.283286	1.2377	0.4884
lpg1099, lpg1525	2	10	0	0	0	0	0	14	39	23	8	11	0	0	1	0	8	17	9	15		1	1	1	1	1	15	40	24	9	12	1	1	2	1	9	18	10	16		0.9176	0.379478	0.849979	0.921065	0.655136	6.10401	11.3314	14.8524	4.3956
lpg1099, lpg1525, lpg1959, lpg2584	4	1	0	0	0	0	0	0	0	0	0	0	0	0	0	0	0	1	0	0		1	1	1	1	1	1	1	1	1	1	1	1	1	1	1	2	1	1		0.9176	0.379478	0.849979	0.921065	0.655136	0.406934	0.283286	0.61885	0.4884
lpg1099, lpg1525, lpg2584	3	10	0	0	0	0	0	44	122	50	25	62	0	0	1	0	33	70	36	43		1	1	1	1	1	45	123	51	26	63	1	1	2	1	34	71	37	44		0.9176	0.379478	0.849979	0.921065	0.655136	18.312	34.8442	31.5614	12.6984
lpg1099, lpg1527, lpg1959	3	2	0	0	0	0	1	0	0	0	0	0	0	0	0	1	0	0	0	0		1	1	1	1	2	1	1	1	1	1	1	1	1	2	1	1	1	1		0.9176	0.379478	0.849979	0.921065	1.31027	0.406934	0.283286	0.61885	0.4884
lpg1099, lpg1527, lpg1959, lpg2733	4	4	2	1	0	0	0	0	0	0	0	0	0	0	2	4	0	0	0	0		3	2	1	1	1	1	1	1	1	1	1	1	3	5	1	1	1	1		2.7528	0.758956	0.849979	0.921065	0.655136	0.406934	0.283286	0.61885	0.4884
lpg1099, lpg1527, lpg2733	3	4	1	1	0	1	0	0	0	0	0	0	0	0	0	1	0	0	0	0		2	2	1	2	1	1	1	1	1	1	1	1	1	2	1	1	1	1		1.8352	0.758956	0.849979	1.84213	0.655136	0.406934	0.283286	0.61885	0.4884
lpg1099, lpg1621	2	7	0	0	0	0	0	2	8	1	0	1	0	0	0	0	1	1	0	4		1	1	1	1	1	3	9	2	1	2	1	1	1	1	2	2	1	5		0.9176	0.379478	0.849979	0.921065	0.655136	1.2208	2.54958	1.2377	0.4884
lpg1099, lpg1621, lpg1701, lpg2271	4	1	0	0	0	0	0	0	0	0	0	0	0	0	0	1	0	0	0	0		1	1	1	1	1	1	1	1	1	1	1	1	1	2	1	1	1	1		0.9176	0.379478	0.849979	0.921065	0.655136	0.406934	0.283286	0.61885	0.4884
lpg1099, lpg1621, lpg2552	3	8	0	0	0	0	0	4	4	3	1	11	0	0	0	0	1	1	0	1		1	1	1	1	1	5	5	4	2	12	1	1	1	1	2	2	1	2		0.9176	0.379478	0.849979	0.921065	0.655136	2.03467	1.41643	2.4754	0.976801
lpg1099, lpg1661	2	3	0	1	1	0	0	0	0	0	0	0	0	0	0	2	0	0	0	0		1	2	2	1	1	1	1	1	1	1	1	1	1	3	1	1	1	1		0.9176	0.758956	1.69996	0.921065	0.655136	0.406934	0.283286	0.61885	0.4884
lpg1099, lpg1661, lpg1702, lpg2804, lpg2884, lpg2885	6	2	0	0	0	0	0	0	0	0	1	0	0	0	0	0	1	0	0	0		1	1	1	1	1	1	1	1	2	1	1	1	1	1	2	1	1	1		0.9176	0.379478	0.849979	0.921065	0.655136	0.406934	0.283286	0.61885	0.976801
lpg1099, lpg1661, lpg1702, lpg2804, lpg2885	5	1	0	0	0	0	0	0	1	0	0	0	0	0	0	0	0	0	0	0		1	1	1	1	1	1	2	1	1	1	1	1	1	1	1	1	1	1		0.9176	0.379478	0.849979	0.921065	0.655136	0.406934	0.566572	0.61885	0.4884
lpg1099, lpg1661, lpg1702, lpg2884, lpg2885	5	2	0	0	0	0	0	0	1	0	0	0	0	0	0	0	0	0	0	1		1	1	1	1	1	1	2	1	1	1	1	1	1	1	1	1	1	2		0.9176	0.379478	0.849979	0.921065	0.655136	0.406934	0.566572	0.61885	0.4884
lpg1099, lpg1661, lpg2244	3	7	0	2	1	1	1	0	0	0	0	0	0	4	1	16	0	0	0	0		1	3	2	2	2	1	1	1	1	1	1	5	2	17	1	1	1	1		0.9176	1.13843	1.69996	1.84213	1.31027	0.406934	0.283286	0.61885	0.4884
lpg1099, lpg1661, lpg2244, lpg2733	4	9	2	14	9	9	9	0	0	0	0	0	10	5	15	37	0	0	0	0		3	15	10	10	10	1	1	1	1	1	11	6	16	38	1	1	1	1		2.7528	5.69217	8.49979	9.21065	6.55136	0.406934	0.283286	0.61885	0.4884
lpg1099, lpg1661, lpg2733	3	4	1	5	0	0	0	0	0	0	0	0	0	2	0	2	0	0	0	0		2	6	1	1	1	1	1	1	1	1	1	3	1	3	1	1	1	1		1.8352	2.27687	0.849979	0.921065	0.655136	0.406934	0.283286	0.61885	0.4884
lpg1099, lpg1661, lpg2804, lpg2884, lpg2885	5	1	0	0	0	0	0	0	0	0	0	0	0	0	0	0	1	0	0	0		1	1	1	1	1	1	1	1	1	1	1	1	1	1	2	1	1	1		0.9176	0.379478	0.849979	0.921065	0.655136	0.406934	0.283286	0.61885	0.4884
lpg1099, lpg1702	2	3	0	0	0	0	0	0	0	0	0	1	0	0	0	1	0	0	0	1		1	1	1	1	1	1	1	1	1	2	1	1	1	2	1	1	1	2		0.9176	0.379478	0.849979	0.921065	0.655136	0.406934	0.283286	0.61885	0.4884
lpg1099, lpg1702, lpg2733	3	2	0	0	0	0	0	0	1	0	0	0	0	0	0	0	0	0	1	0		1	1	1	1	1	1	2	1	1	1	1	1	1	1	1	1	2	1		0.9176	0.379478	0.849979	0.921065	0.655136	0.406934	0.566572	0.61885	0.4884
lpg1099, lpg1702, lpg2733, lpg2885	4	7	0	0	0	0	0	1	2	1	0	2	0	0	0	0	1	0	1	1		1	1	1	1	1	2	3	2	1	3	1	1	1	1	2	1	2	2		0.9176	0.379478	0.849979	0.921065	0.655136	0.813868	0.849858	1.2377	0.4884
lpg1099, lpg1702, lpg2804, lpg2884	4	1	0	0	0	0	0	0	1	0	0	0	0	0	0	0	0	0	0	0		1	1	1	1	1	1	2	1	1	1	1	1	1	1	1	1	1	1		0.9176	0.379478	0.849979	0.921065	0.655136	0.406934	0.566572	0.61885	0.4884
lpg1099, lpg1702, lpg2885	3	3	0	0	0	0	0	1	3	0	0	0	0	0	0	0	0	1	0	0		1	1	1	1	1	2	4	1	1	1	1	1	1	1	1	2	1	1		0.9176	0.379478	0.849979	0.921065	0.655136	0.813868	1.13314	0.61885	0.4884
lpg1099, lpg1907, lpg2815, lpg2884	4	1	0	0	0	0	0	0	0	0	0	0	0	0	0	0	1	0	0	0		1	1	1	1	1	1	1	1	1	1	1	1	1	1	2	1	1	1		0.9176	0.379478	0.849979	0.921065	0.655136	0.406934	0.283286	0.61885	0.4884
lpg1099, lpg1959	2	3	1	0	0	0	0	0	0	0	0	0	1	0	0	3	0	0	0	0		2	1	1	1	1	1	1	1	1	1	2	1	1	4	1	1	1	1		1.8352	0.379478	0.849979	0.921065	0.655136	0.406934	0.283286	0.61885	0.4884
lpg1099, lpg1959, lpg2733	3	6	1	1	1	1	0	0	0	0	0	0	0	0	1	3	0	0	0	0		2	2	2	2	1	1	1	1	1	1	1	1	2	4	1	1	1	1		1.8352	0.758956	1.69996	1.84213	0.655136	0.406934	0.283286	0.61885	0.4884
lpg1099, lpg1959, lpg2806	3	9	1	5	1	1	5	0	0	0	0	0	1	1	5	5	0	0	0	0		2	6	2	2	6	1	1	1	1	1	2	2	6	6	1	1	1	1		1.8352	2.27687	1.69996	1.84213	3.93082	0.406934	0.283286	0.61885	0.4884
lpg1099, lpg2223, lpg2271, lpg2552, lpg2584, lpg2888, lpg3000	7	2	0	0	0	0	0	0	0	0	0	0	0	0	1	1	0	0	0	0		1	1	1	1	1	1	1	1	1	1	1	1	2	2	1	1	1	1		0.9176	0.379478	0.849979	0.921065	0.655136	0.406934	0.283286	0.61885	0.4884
lpg1099, lpg2223, lpg2271, lpg2552, lpg2888, lpg3000	6	1	0	0	1	0	0	0	0	0	0	0	0	0	0	0	0	0	0	0		1	1	2	1	1	1	1	1	1	1	1	1	1	1	1	1	1	1		0.9176	0.379478	1.69996	0.921065	0.655136	0.406934	0.283286	0.61885	0.4884
lpg1099, lpg2223, lpg2584, lpg2815	4	1	0	0	0	0	0	0	0	0	0	0	1	0	0	0	0	0	0	0		1	1	1	1	1	1	1	1	1	1	2	1	1	1	1	1	1	1		0.9176	0.379478	0.849979	0.921065	0.655136	0.406934	0.283286	0.61885	0.4884
lpg1099, lpg2244	2	13	0	2	0	2	0	6	18	4	3	17	0	0	1	1	7	9	1	3		1	3	1	3	1	7	19	5	4	18	1	1	2	2	8	10	2	4		0.9176	1.13843	0.849979	2.76319	0.655136	2.84854	5.38244	3.09425	1.9536
lpg1099, lpg2244, lpg2733	3	6	1	2	4	0	0	0	0	0	0	0	0	1	1	11	0	0	0	0		2	3	5	1	1	1	1	1	1	1	1	2	2	12	1	1	1	1		1.8352	1.13843	4.24989	0.921065	0.655136	0.406934	0.283286	0.61885	0.4884
lpg1099, lpg2271	2	9	53	310	99	37	253	0	0	0	0	0	83	47	77	41	0	0	0	0		54	311	100	38	254	1	1	1	1	1	84	48	78	42	1	1	1	1		49.5504	118.018	84.9979	35.0005	166.405	0.406934	0.283286	0.61885	0.4884
lpg1099, lpg2271, lpg2552	3	3	0	1	0	0	1	0	0	0	0	0	0	0	0	1	0	0	0	0		1	2	1	1	2	1	1	1	1	1	1	1	1	2	1	1	1	1		0.9176	0.758956	0.849979	0.921065	1.31027	0.406934	0.283286	0.61885	0.4884
lpg1099, lpg2271, lpg2552, lpg2584, lpg2692	5	2	0	0	1	0	1	0	0	0	0	0	0	0	0	0	0	0	0	0		1	1	2	1	2	1	1	1	1	1	1	1	1	1	1	1	1	1		0.9176	0.379478	1.69996	0.921065	1.31027	0.406934	0.283286	0.61885	0.4884
lpg1099, lpg2271, lpg2552, lpg2733	4	1	0	1	0	0	0	0	0	0	0	0	0	0	0	0	0	0	0	0		1	2	1	1	1	1	1	1	1	1	1	1	1	1	1	1	1	1		0.9176	0.758956	0.849979	0.921065	0.655136	0.406934	0.283286	0.61885	0.4884
lpg1099, lpg2271, lpg2584	3	10	322	1591	853	327	2029	0	0	0	0	0	502	396	577	197	4	0	0	0		323	1592	854	328	2030	1	1	1	1	1	503	397	578	198	5	1	1	1		296.385	604.129	725.882	302.109	1329.93	0.406934	0.283286	0.61885	0.4884
lpg1099, lpg2271, lpg2584, lpg2692	4	1	0	0	0	0	0	0	0	0	0	0	1	0	0	0	0	0	0	0		1	1	1	1	1	1	1	1	1	1	2	1	1	1	1	1	1	1		0.9176	0.379478	0.849979	0.921065	0.655136	0.406934	0.283286	0.61885	0.4884
lpg1099, lpg2271, lpg2733	3	1	0	0	0	0	0	0	0	0	0	0	0	0	1	0	0	0	0	0		1	1	1	1	1	1	1	1	1	1	1	1	2	1	1	1	1	1		0.9176	0.379478	0.849979	0.921065	0.655136	0.406934	0.283286	0.61885	0.4884
lpg1099, lpg2552	2	8	0	0	0	0	0	3	13	1	4	4	0	0	0	1	0	6	0	3		1	1	1	1	1	4	14	2	5	5	1	1	1	2	1	7	1	4		0.9176	0.379478	0.849979	0.921065	0.655136	1.62774	3.96601	1.2377	2.442
lpg1099, lpg2584	2	18	97	565	265	76	536	19	60	31	13	39	168	87	140	72	13	16	13	12		98	566	266	77	537	20	61	32	14	40	169	88	141	73	14	17	14	13		89.9248	214.784	226.094	70.922	351.808	8.13868	17.2805	19.8032	6.83761
lpg1099, lpg2584, lpg2874	3	1	0	0	0	0	0	0	0	0	0	0	0	0	0	1	0	0	0	0		1	1	1	1	1	1	1	1	1	1	1	1	1	2	1	1	1	1		0.9176	0.379478	0.849979	0.921065	0.655136	0.406934	0.283286	0.61885	0.4884
lpg1099, lpg2584, lpg3000	3	1	0	0	0	0	0	0	0	0	0	0	0	0	1	0	0	0	0	0		1	1	1	1	1	1	1	1	1	1	1	1	2	1	1	1	1	1		0.9176	0.379478	0.849979	0.921065	0.655136	0.406934	0.283286	0.61885	0.4884
lpg1099, lpg2628	2	5	0	0	0	0	0	1	1	0	1	0	0	0	0	0	0	1	1	0		1	1	1	1	1	2	2	1	2	1	1	1	1	1	1	2	2	1		0.9176	0.379478	0.849979	0.921065	0.655136	0.813868	0.566572	0.61885	0.976801
lpg1099, lpg2692	2	3	0	0	0	0	0	1	0	0	0	1	0	0	0	0	0	0	1	0		1	1	1	1	1	2	1	1	1	2	1	1	1	1	1	1	2	1		0.9176	0.379478	0.849979	0.921065	0.655136	0.813868	0.283286	0.61885	0.4884
lpg1099, lpg2692, lpg2804	3	4	1	1	1	0	0	0	0	0	0	0	1	0	0	0	0	0	0	0		2	2	2	1	1	1	1	1	1	1	2	1	1	1	1	1	1	1		1.8352	0.758956	1.69996	0.921065	0.655136	0.406934	0.283286	0.61885	0.4884
lpg1099, lpg2692, lpg2804, lpg3000	4	9	3	15	6	1	5	0	0	0	0	0	2	2	4	8	0	0	0	0		4	16	7	2	6	1	1	1	1	1	3	3	5	9	1	1	1	1		3.6704	6.07165	5.94985	1.84213	3.93082	0.406934	0.283286	0.61885	0.4884
lpg1099, lpg2692, lpg2806	3	6	0	0	0	0	0	1	5	0	1	3	0	0	0	0	0	2	0	2		1	1	1	1	1	2	6	1	2	4	1	1	1	1	1	3	1	3		0.9176	0.379478	0.849979	0.921065	0.655136	0.813868	1.69972	0.61885	0.976801
lpg1099, lpg2692, lpg3000	3	3	0	1	2	0	0	0	0	0	0	0	1	0	0	0	0	0	0	0		1	2	3	1	1	1	1	1	1	1	2	1	1	1	1	1	1	1		0.9176	0.758956	2.54994	0.921065	0.655136	0.406934	0.283286	0.61885	0.4884
lpg1099, lpg2733	2	1	0	0	0	1	0	0	0	0	0	0	0	0	0	0	0	0	0	0		1	1	1	2	1	1	1	1	1	1	1	1	1	1	1	1	1	1		0.9176	0.379478	0.849979	1.84213	0.655136	0.406934	0.283286	0.61885	0.4884
lpg1099, lpg2733, lpg2885	3	1	0	0	0	0	0	0	0	0	0	0	0	0	0	0	1	0	0	0		1	1	1	1	1	1	1	1	1	1	1	1	1	1	2	1	1	1		0.9176	0.379478	0.849979	0.921065	0.655136	0.406934	0.283286	0.61885	0.4884
lpg1099, lpg2804	2	2	0	0	0	0	0	0	0	0	0	0	0	1	0	1	0	0	0	0		1	1	1	1	1	1	1	1	1	1	1	2	1	2	1	1	1	1		0.9176	0.379478	0.849979	0.921065	0.655136	0.406934	0.283286	0.61885	0.4884
lpg1099, lpg2804, lpg2885	3	1	0	0	0	0	0	0	0	0	1	0	0	0	0	0	0	0	0	0		1	1	1	1	1	1	1	1	2	1	1	1	1	1	1	1	1	1		0.9176	0.379478	0.849979	0.921065	0.655136	0.406934	0.283286	0.61885	0.976801
lpg1099, lpg2804, lpg3000	3	4	0	3	0	0	0	0	0	0	0	0	0	1	1	3	0	0	0	0		1	4	1	1	1	1	1	1	1	1	1	2	2	4	1	1	1	1		0.9176	1.51791	0.849979	0.921065	0.655136	0.406934	0.283286	0.61885	0.4884
lpg1099, lpg2806	2	4	0	0	0	0	1	0	2	0	0	0	1	0	2	0	0	0	0	0		1	1	1	1	2	1	3	1	1	1	2	1	3	1	1	1	1	1		0.9176	0.379478	0.849979	0.921065	1.31027	0.406934	0.849858	0.61885	0.4884
lpg1099, lpg2815	2	7	2	0	0	1	0	0	0	0	0	0	2	1	3	2	0	0	1	0		3	1	1	2	1	1	1	1	1	1	3	2	4	3	1	1	2	1		2.7528	0.379478	0.849979	1.84213	0.655136	0.406934	0.283286	0.61885	0.4884
lpg1099, lpg2874	2	8	0	1	0	0	0	0	7	2	1	2	0	0	0	0	2	2	0	2		1	2	1	1	1	1	8	3	2	3	1	1	1	1	3	3	1	3		0.9176	0.758956	0.849979	0.921065	0.655136	0.406934	2.26629	1.85655	0.976801
lpg1099, lpg2885	2	9	0	0	0	0	0	41	17	7	26	11	0	0	0	0	27	11	11	16		1	1	1	1	1	42	18	8	27	12	1	1	1	1	28	12	12	17		0.9176	0.379478	0.849979	0.921065	0.655136	17.0912	5.09915	4.9508	13.1868
lpg1099, lpg3000	2	4	0	1	1	0	0	0	0	0	0	0	0	1	1	0	0	0	0	0		1	2	2	1	1	1	1	1	1	1	1	2	2	1	1	1	1	1		0.9176	0.758956	1.69996	0.921065	0.655136	0.406934	0.283286	0.61885	0.4884
lpg1137	1	18	22	9	10	7	6	11	21	5	1	8	13	9	5	26	6	9	3	10		23	10	11	8	7	12	22	6	2	9	14	10	6	27	7	10	4	11		21.1048	3.79478	9.34977	7.36852	4.58595	4.88321	6.23229	3.7131	0.976801
lpg1137, lpg1525	2	4	0	0	0	0	0	0	1	0	0	0	0	0	0	0	0	1	1	3		1	1	1	1	1	1	2	1	1	1	1	1	1	1	1	2	2	4		0.9176	0.379478	0.849979	0.921065	0.655136	0.406934	0.566572	0.61885	0.4884
lpg1137, lpg1525, lpg1621, lpg1701, lpg2223, lpg2271, lpg2692, lpg3000	8	1	0	0	0	0	0	0	0	0	0	0	0	0	0	0	0	0	0	1		1	1	1	1	1	1	1	1	1	1	1	1	1	1	1	1	1	2		0.9176	0.379478	0.849979	0.921065	0.655136	0.406934	0.283286	0.61885	0.4884
lpg1137, lpg1525, lpg1701	3	7	0	0	0	0	0	1	1	1	1	1	0	0	0	0	0	1	0	1		1	1	1	1	1	2	2	2	2	2	1	1	1	1	1	2	1	2		0.9176	0.379478	0.849979	0.921065	0.655136	0.813868	0.566572	1.2377	0.976801
lpg1137, lpg1525, lpg1701, lpg1702	4	7	0	0	0	0	0	2	27	7	0	0	0	0	0	0	3	16	5	9		1	1	1	1	1	3	28	8	1	1	1	1	1	1	4	17	6	10		0.9176	0.379478	0.849979	0.921065	0.655136	1.2208	7.93201	4.9508	0.4884
lpg1137, lpg1525, lpg1702	3	7	0	0	0	0	0	0	6	2	0	2	0	0	0	0	1	3	1	2		1	1	1	1	1	1	7	3	1	3	1	1	1	1	2	4	2	3		0.9176	0.379478	0.849979	0.921065	0.655136	0.406934	1.983	1.85655	0.4884
lpg1137, lpg1527	2	3	0	0	0	0	0	0	0	0	0	0	0	1	0	0	1	0	0	1		1	1	1	1	1	1	1	1	1	1	1	2	1	1	2	1	1	2		0.9176	0.379478	0.849979	0.921065	0.655136	0.406934	0.283286	0.61885	0.4884
lpg1137, lpg1527, lpg1959	3	1	0	0	0	0	0	0	0	0	0	0	0	0	0	2	0	0	0	0		1	1	1	1	1	1	1	1	1	1	1	1	1	3	1	1	1	1		0.9176	0.379478	0.849979	0.921065	0.655136	0.406934	0.283286	0.61885	0.4884
lpg1137, lpg1527, lpg1959, lpg2733	4	1	0	0	0	0	0	0	0	0	0	0	0	0	0	1	0	0	0	0		1	1	1	1	1	1	1	1	1	1	1	1	1	2	1	1	1	1		0.9176	0.379478	0.849979	0.921065	0.655136	0.406934	0.283286	0.61885	0.4884
lpg1137, lpg1527, lpg2733	3	4	0	0	0	0	0	2	0	0	0	0	0	0	0	0	0	4	1	5		1	1	1	1	1	3	1	1	1	1	1	1	1	1	1	5	2	6		0.9176	0.379478	0.849979	0.921065	0.655136	1.2208	0.283286	0.61885	0.4884
lpg1137, lpg1527, lpg2733, lpg2815	4	5	0	0	0	0	0	4	0	0	1	0	0	0	0	0	0	4	2	4		1	1	1	1	1	5	1	1	2	1	1	1	1	1	1	5	3	5		0.9176	0.379478	0.849979	0.921065	0.655136	2.03467	0.283286	0.61885	0.976801
lpg1137, lpg1527, lpg2815	3	6	0	0	0	0	0	1	0	0	1	0	0	0	0	0	1	3	1	1		1	1	1	1	1	2	1	1	2	1	1	1	1	1	2	4	2	2		0.9176	0.379478	0.849979	0.921065	0.655136	0.813868	0.283286	0.61885	0.976801
lpg1137, lpg1621	2	7	0	0	0	0	0	2	3	2	1	0	0	0	0	0	3	2	0	3		1	1	1	1	1	3	4	3	2	1	1	1	1	1	4	3	1	4		0.9176	0.379478	0.849979	0.921065	0.655136	1.2208	1.13314	1.85655	0.976801
lpg1137, lpg1621, lpg1689	3	9	0	0	0	0	0	5	17	6	2	27	0	0	0	0	5	5	5	5		1	1	1	1	1	6	18	7	3	28	1	1	1	1	6	6	6	6		0.9176	0.379478	0.849979	0.921065	0.655136	2.4416	5.09915	4.33195	1.4652
lpg1137, lpg1621, lpg1701	3	9	0	0	0	0	0	5	19	3	1	1	0	0	0	0	1	4	2	2		1	1	1	1	1	6	20	4	2	2	1	1	1	1	2	5	3	3		0.9176	0.379478	0.849979	0.921065	0.655136	2.4416	5.66572	2.4754	0.976801
lpg1137, lpg1621, lpg1701, lpg1959, lpg2271, lpg2885, lpg2888	7	1	0	0	0	0	0	0	1	0	0	0	0	0	0	0	0	0	0	0		1	1	1	1	1	1	2	1	1	1	1	1	1	1	1	1	1	1		0.9176	0.379478	0.849979	0.921065	0.655136	0.406934	0.566572	0.61885	0.4884
lpg1137, lpg1621, lpg1701, lpg1959, lpg2271, lpg2888	6	1	0	0	0	0	0	1	0	0	0	0	0	0	0	0	0	0	0	0		1	1	1	1	1	2	1	1	1	1	1	1	1	1	1	1	1	1		0.9176	0.379478	0.849979	0.921065	0.655136	0.813868	0.283286	0.61885	0.4884
lpg1137, lpg1621, lpg1701, lpg2271	4	9	0	0	0	0	0	29	105	48	13	24	0	0	0	0	36	47	14	39		1	1	1	1	1	30	106	49	14	25	1	1	1	1	37	48	15	40		0.9176	0.379478	0.849979	0.921065	0.655136	12.208	30.0283	30.3237	6.83761
lpg1137, lpg1621, lpg1907	3	8	0	0	0	0	0	1	4	2	0	4	0	0	0	0	1	3	1	1		1	1	1	1	1	2	5	3	1	5	1	1	1	1	2	4	2	2		0.9176	0.379478	0.849979	0.921065	0.655136	0.813868	1.41643	1.85655	0.4884
lpg1137, lpg1621, lpg2271	3	6	0	0	0	0	0	0	11	4	1	2	0	0	0	0	0	5	0	1		1	1	1	1	1	1	12	5	2	3	1	1	1	1	1	6	1	2		0.9176	0.379478	0.849979	0.921065	0.655136	0.406934	3.39943	3.09425	0.976801
lpg1137, lpg1661	2	4	0	0	0	0	0	1	0	0	0	1	0	0	0	0	0	3	0	1		1	1	1	1	1	2	1	1	1	2	1	1	1	1	1	4	1	2		0.9176	0.379478	0.849979	0.921065	0.655136	0.813868	0.283286	0.61885	0.4884
lpg1137, lpg1661, lpg2244	3	7	0	0	0	0	0	0	9	4	1	1	0	0	0	0	1	6	3	0		1	1	1	1	1	1	10	5	2	2	1	1	1	1	2	7	4	1		0.9176	0.379478	0.849979	0.921065	0.655136	0.406934	2.83286	3.09425	0.976801
lpg1137, lpg1661, lpg2552, lpg2692, lpg2885	5	1	0	0	0	0	0	0	0	0	0	1	0	0	0	0	0	0	0	0		1	1	1	1	1	1	1	1	1	2	1	1	1	1	1	1	1	1		0.9176	0.379478	0.849979	0.921065	0.655136	0.406934	0.283286	0.61885	0.4884
lpg1137, lpg1689	2	7	0	0	0	0	0	1	5	2	0	1	0	0	1	0	0	2	0	3		1	1	1	1	1	2	6	3	1	2	1	1	2	1	1	3	1	4		0.9176	0.379478	0.849979	0.921065	0.655136	0.813868	1.69972	1.85655	0.4884
lpg1137, lpg1689, lpg2692	3	1	0	0	0	0	0	0	0	0	0	0	0	0	2	0	0	0	0	0		1	1	1	1	1	1	1	1	1	1	1	1	3	1	1	1	1	1		0.9176	0.379478	0.849979	0.921065	0.655136	0.406934	0.283286	0.61885	0.4884
lpg1137, lpg1701	2	8	0	0	0	0	0	5	9	5	1	7	0	0	0	0	1	5	0	6		1	1	1	1	1	6	10	6	2	8	1	1	1	1	2	6	1	7		0.9176	0.379478	0.849979	0.921065	0.655136	2.4416	2.83286	3.7131	0.976801
lpg1137, lpg1701, lpg1702	3	7	0	0	0	0	0	4	3	1	2	2	0	0	0	0	0	6	0	4		1	1	1	1	1	5	4	2	3	3	1	1	1	1	1	7	1	5		0.9176	0.379478	0.849979	0.921065	0.655136	2.03467	1.13314	1.2377	1.4652
lpg1137, lpg1701, lpg1702, lpg2584, lpg2885	5	1	0	0	0	0	0	0	0	1	0	0	0	0	0	0	0	0	0	0		1	1	1	1	1	1	1	2	1	1	1	1	1	1	1	1	1	1		0.9176	0.379478	0.849979	0.921065	0.655136	0.406934	0.283286	1.2377	0.4884
lpg1137, lpg1701, lpg2271	3	9	0	0	0	0	0	2	7	8	2	5	0	0	0	0	2	7	3	3		1	1	1	1	1	3	8	9	3	6	1	1	1	1	3	8	4	4		0.9176	0.379478	0.849979	0.921065	0.655136	1.2208	2.26629	5.56965	1.4652
lpg1137, lpg1702	2	5	0	0	0	0	0	0	1	2	1	1	0	0	0	0	0	1	0	0		1	1	1	1	1	1	2	3	2	2	1	1	1	1	1	2	1	1		0.9176	0.379478	0.849979	0.921065	0.655136	0.406934	0.566572	1.85655	0.976801
lpg1137, lpg1907	2	7	0	0	0	0	0	12	0	0	5	1	0	0	0	0	6	13	5	2		1	1	1	1	1	13	1	1	6	2	1	1	1	1	7	14	6	3		0.9176	0.379478	0.849979	0.921065	0.655136	5.29014	0.283286	0.61885	2.9304
lpg1137, lpg1907, lpg2806	3	6	0	0	0	0	0	23	0	0	22	0	0	0	0	0	17	20	7	12		1	1	1	1	1	24	1	1	23	1	1	1	1	1	18	21	8	13		0.9176	0.379478	0.849979	0.921065	0.655136	9.76642	0.283286	0.61885	11.2332
lpg1137, lpg1907, lpg2806, lpg2815	4	8	0	0	0	0	0	86	1	0	73	0	0	0	1	0	73	113	34	81		1	1	1	1	1	87	2	1	74	1	1	1	2	1	74	114	35	82		0.9176	0.379478	0.849979	0.921065	0.655136	35.4033	0.566572	0.61885	36.1416
lpg1137, lpg1907, lpg2815	3	6	0	0	0	0	0	26	0	0	23	0	0	0	0	0	13	22	6	12		1	1	1	1	1	27	1	1	24	1	1	1	1	1	14	23	7	13		0.9176	0.379478	0.849979	0.921065	0.655136	10.9872	0.283286	0.61885	11.7216
lpg1137, lpg1959	2	1	0	0	0	0	1	0	0	0	0	0	0	0	0	0	0	0	0	0		1	1	1	1	2	1	1	1	1	1	1	1	1	1	1	1	1	1		0.9176	0.379478	0.849979	0.921065	1.31027	0.406934	0.283286	0.61885	0.4884
lpg1137, lpg1959, lpg2733	3	2	0	1	0	1	0	0	0	0	0	0	0	0	0	0	0	0	0	0		1	2	1	2	1	1	1	1	1	1	1	1	1	1	1	1	1	1		0.9176	0.758956	0.849979	1.84213	0.655136	0.406934	0.283286	0.61885	0.4884
lpg1137, lpg2223, lpg2885	3	3	2	0	0	0	1	0	0	0	0	0	0	0	0	1	0	0	0	0		3	1	1	1	2	1	1	1	1	1	1	1	1	2	1	1	1	1		2.7528	0.379478	0.849979	0.921065	1.31027	0.406934	0.283286	0.61885	0.4884
lpg1137, lpg2244	2	9	1	4	1	0	1	2	2	0	0	0	0	1	0	3	0	1	0	0		2	5	2	1	2	3	3	1	1	1	1	2	1	4	1	2	1	1		1.8352	1.89739	1.69996	0.921065	1.31027	1.2208	0.849858	0.61885	0.4884
lpg1137, lpg2244, lpg2552	3	9	2	35	11	2	3	0	0	0	0	0	1	7	2	14	0	0	0	0		3	36	12	3	4	1	1	1	1	1	2	8	3	15	1	1	1	1		2.7528	13.6612	10.1997	2.76319	2.62055	0.406934	0.283286	0.61885	0.4884
lpg1137, lpg2244, lpg2552, lpg2874	4	10	31	188	79	32	37	0	0	0	0	0	18	84	44	165	0	0	1	0		32	189	80	33	38	1	1	1	1	1	19	85	45	166	1	1	2	1		29.3632	71.7213	67.9983	30.3951	24.8952	0.406934	0.283286	0.61885	0.4884
lpg1137, lpg2244, lpg2874	3	9	2	23	6	3	3	0	0	0	0	0	7	8	4	16	0	0	0	0		3	24	7	4	4	1	1	1	1	1	8	9	5	17	1	1	1	1		2.7528	9.10747	5.94985	3.68426	2.62055	0.406934	0.283286	0.61885	0.4884
lpg1137, lpg2271	2	5	0	0	0	0	0	0	2	0	1	2	0	0	0	0	1	3	0	0		1	1	1	1	1	1	3	1	2	3	1	1	1	1	2	4	1	1		0.9176	0.379478	0.849979	0.921065	0.655136	0.406934	0.849858	0.61885	0.976801
lpg1137, lpg2552	2	8	1	6	3	2	2	0	0	0	0	0	0	1	1	5	0	0	0	0		2	7	4	3	3	1	1	1	1	1	1	2	2	6	1	1	1	1		1.8352	2.65634	3.39992	2.76319	1.96541	0.406934	0.283286	0.61885	0.4884
lpg1137, lpg2552, lpg2584	3	3	0	1	0	1	0	0	0	0	0	0	0	0	0	5	0	0	0	0		1	2	1	2	1	1	1	1	1	1	1	1	1	6	1	1	1	1		0.9176	0.758956	0.849979	1.84213	0.655136	0.406934	0.283286	0.61885	0.4884
lpg1137, lpg2552, lpg2874	3	9	8	23	8	3	2	0	0	0	0	0	1	4	2	17	0	0	0	0		9	24	9	4	3	1	1	1	1	1	2	5	3	18	1	1	1	1		8.2584	9.10747	7.64981	3.68426	1.96541	0.406934	0.283286	0.61885	0.4884
lpg1137, lpg2584	2	1	0	0	0	0	1	0	0	0	0	0	0	0	0	0	0	0	0	0		1	1	1	1	2	1	1	1	1	1	1	1	1	1	1	1	1	1		0.9176	0.379478	0.849979	0.921065	1.31027	0.406934	0.283286	0.61885	0.4884
lpg1137, lpg2692, lpg2884	3	1	0	0	0	0	0	0	0	0	0	0	0	0	0	0	0	1	0	0		1	1	1	1	1	1	1	1	1	1	1	1	1	1	1	2	1	1		0.9176	0.379478	0.849979	0.921065	0.655136	0.406934	0.283286	0.61885	0.4884
lpg1137, lpg2733	2	7	0	0	0	0	2	0	0	0	1	1	0	0	0	0	1	1	2	1		1	1	1	1	3	1	1	1	2	2	1	1	1	1	2	2	3	2		0.9176	0.379478	0.849979	0.921065	1.96541	0.406934	0.283286	0.61885	0.976801
lpg1137, lpg2733, lpg2815	3	1	0	0	0	0	0	0	0	0	0	0	0	0	0	0	0	1	0	0		1	1	1	1	1	1	1	1	1	1	1	1	1	1	1	2	1	1		0.9176	0.379478	0.849979	0.921065	0.655136	0.406934	0.283286	0.61885	0.4884
lpg1137, lpg2806	2	5	0	0	0	0	0	3	0	0	2	0	0	0	0	0	3	4	0	1		1	1	1	1	1	4	1	1	3	1	1	1	1	1	4	5	1	2		0.9176	0.379478	0.849979	0.921065	0.655136	1.62774	0.283286	0.61885	1.4652
lpg1137, lpg2806, lpg2815	3	6	0	0	0	0	0	7	0	0	8	0	0	0	0	0	4	9	5	4		1	1	1	1	1	8	1	1	9	1	1	1	1	1	5	10	6	5		0.9176	0.379478	0.849979	0.921065	0.655136	3.25547	0.283286	0.61885	4.3956
lpg1137, lpg2815	2	5	0	0	0	0	0	6	0	0	2	0	0	0	0	0	0	4	1	2		1	1	1	1	1	7	1	1	3	1	1	1	1	1	1	5	2	3		0.9176	0.379478	0.849979	0.921065	0.655136	2.84854	0.283286	0.61885	1.4652
lpg1137, lpg2874	2	6	0	9	1	1	0	0	0	0	0	0	1	1	0	3	0	0	0	0		1	10	2	2	1	1	1	1	1	1	2	2	1	4	1	1	1	1		0.9176	3.79478	1.69996	1.84213	0.655136	0.406934	0.283286	0.61885	0.4884
lpg1137, lpg2874, lpg2885	3	1	0	0	0	1	0	0	0	0	0	0	0	0	0	0	0	0	0	0		1	1	1	2	1	1	1	1	1	1	1	1	1	1	1	1	1	1		0.9176	0.379478	0.849979	1.84213	0.655136	0.406934	0.283286	0.61885	0.4884
lpg1137, lpg2884	2	9	0	0	0	0	0	5	11	2	3	7	0	0	0	0	4	9	5	2		1	1	1	1	1	6	12	3	4	8	1	1	1	1	5	10	6	3		0.9176	0.379478	0.849979	0.921065	0.655136	2.4416	3.39943	1.85655	1.9536
lpg1137, lpg2885	2	3	0	0	0	1	0	0	0	0	0	0	0	0	1	1	0	0	0	0		1	1	1	2	1	1	1	1	1	1	1	1	2	2	1	1	1	1		0.9176	0.379478	0.849979	1.84213	0.655136	0.406934	0.283286	0.61885	0.4884
lpg1137, lpg3000	2	7	0	0	0	0	0	1	2	1	1	1	0	0	0	0	0	1	0	1		1	1	1	1	1	2	3	2	2	2	1	1	1	1	1	2	1	2		0.9176	0.379478	0.849979	0.921065	0.655136	0.813868	0.849858	1.2377	0.976801
lpg1148	1	9	0	0	0	0	0	16	22	12	19	12	0	0	0	0	2	19	7	8		1	1	1	1	1	17	23	13	20	13	1	1	1	1	3	20	8	9		0.9176	0.379478	0.849979	0.921065	0.655136	6.91788	6.51558	8.04505	9.76801
lpg1148, lpg1527, lpg1621, lpg2584	4	1	0	0	0	0	0	0	0	1	0	0	0	0	0	0	0	0	0	0		1	1	1	1	1	1	1	2	1	1	1	1	1	1	1	1	1	1		0.9176	0.379478	0.849979	0.921065	0.655136	0.406934	0.283286	1.2377	0.4884
lpg1148, lpg1621	2	9	0	0	0	0	0	3	6	1	4	8	0	0	0	0	3	3	2	3		1	1	1	1	1	4	7	2	5	9	1	1	1	1	4	4	3	4		0.9176	0.379478	0.849979	0.921065	0.655136	1.62774	1.983	1.2377	2.442
lpg1148, lpg1661, lpg1702, lpg2804, lpg2884, lpg2885	6	4	0	0	0	0	0	3	0	0	0	1	0	0	0	0	0	1	0	2		1	1	1	1	1	4	1	1	1	2	1	1	1	1	1	2	1	3		0.9176	0.379478	0.849979	0.921065	0.655136	1.62774	0.283286	0.61885	0.4884
lpg1148, lpg1661, lpg1702, lpg2804, lpg2885	5	1	0	0	0	0	0	0	1	0	0	0	0	0	0	0	0	0	0	0		1	1	1	1	1	1	2	1	1	1	1	1	1	1	1	1	1	1		0.9176	0.379478	0.849979	0.921065	0.655136	0.406934	0.566572	0.61885	0.4884
lpg1148, lpg1661, lpg2804, lpg2884	4	1	0	0	0	0	0	0	0	0	0	0	0	0	0	0	0	0	1	0		1	1	1	1	1	1	1	1	1	1	1	1	1	1	1	1	2	1		0.9176	0.379478	0.849979	0.921065	0.655136	0.406934	0.283286	0.61885	0.4884
lpg1148, lpg1661, lpg2804, lpg2884, lpg2885	5	1	0	0	0	0	0	0	0	0	1	0	0	0	0	0	0	0	0	0		1	1	1	1	1	1	1	1	2	1	1	1	1	1	1	1	1	1		0.9176	0.379478	0.849979	0.921065	0.655136	0.406934	0.283286	0.61885	0.976801
lpg1148, lpg1661, lpg2884, lpg2885	4	1	0	0	0	0	0	0	0	0	0	0	0	0	0	0	0	1	0	0		1	1	1	1	1	1	1	1	1	1	1	1	1	1	1	2	1	1		0.9176	0.379478	0.849979	0.921065	0.655136	0.406934	0.283286	0.61885	0.4884
lpg1148, lpg1701	2	8	0	0	0	0	0	5	6	2	3	3	0	0	0	0	2	6	3	0		1	1	1	1	1	6	7	3	4	4	1	1	1	1	3	7	4	1		0.9176	0.379478	0.849979	0.921065	0.655136	2.4416	1.983	1.85655	1.9536
lpg1148, lpg1702, lpg1776, lpg2244, lpg2692, lpg2806, lpg2815	7	1	0	0	0	0	0	0	0	0	1	0	0	0	0	0	0	0	0	0		1	1	1	1	1	1	1	1	2	1	1	1	1	1	1	1	1	1		0.9176	0.379478	0.849979	0.921065	0.655136	0.406934	0.283286	0.61885	0.976801
lpg1148, lpg1702, lpg2804, lpg2884	4	2	0	0	0	0	0	0	1	0	0	0	0	0	0	0	1	0	0	0		1	1	1	1	1	1	2	1	1	1	1	1	1	1	2	1	1	1		0.9176	0.379478	0.849979	0.921065	0.655136	0.406934	0.566572	0.61885	0.4884
lpg1148, lpg1702, lpg2804, lpg2884, lpg2885	5	3	0	0	0	0	0	0	1	0	0	0	0	0	0	0	0	1	0	1		1	1	1	1	1	1	2	1	1	1	1	1	1	1	1	2	1	2		0.9176	0.379478	0.849979	0.921065	0.655136	0.406934	0.566572	0.61885	0.4884
lpg1148, lpg1702, lpg2804, lpg2885	4	1	0	0	0	0	0	0	0	0	0	0	0	0	0	0	0	0	0	1		1	1	1	1	1	1	1	1	1	1	1	1	1	1	1	1	1	2		0.9176	0.379478	0.849979	0.921065	0.655136	0.406934	0.283286	0.61885	0.4884
lpg1148, lpg1776	2	1	0	0	0	0	0	0	0	0	0	0	0	0	0	0	0	1	0	0		1	1	1	1	1	1	1	1	1	1	1	1	1	1	1	2	1	1		0.9176	0.379478	0.849979	0.921065	0.655136	0.406934	0.283286	0.61885	0.4884
lpg1148, lpg1907	2	1	0	0	0	0	0	0	1	0	0	0	0	0	0	0	0	0	0	0		1	1	1	1	1	1	2	1	1	1	1	1	1	1	1	1	1	1		0.9176	0.379478	0.849979	0.921065	0.655136	0.406934	0.566572	0.61885	0.4884
lpg1148, lpg1907, lpg2628	3	2	0	0	0	0	0	1	0	0	0	0	0	0	0	0	0	1	0	0		1	1	1	1	1	2	1	1	1	1	1	1	1	1	1	2	1	1		0.9176	0.379478	0.849979	0.921065	0.655136	0.813868	0.283286	0.61885	0.4884
lpg1148, lpg1907, lpg2628, lpg2692	4	3	0	0	0	0	0	0	2	0	1	0	0	0	0	0	0	0	1	0		1	1	1	1	1	1	3	1	2	1	1	1	1	1	1	1	2	1		0.9176	0.379478	0.849979	0.921065	0.655136	0.406934	0.849858	0.61885	0.976801
lpg1148, lpg1907, lpg2628, lpg2692, lpg2733	5	6	0	0	0	0	0	3	2	2	1	2	0	0	0	0	0	5	0	0		1	1	1	1	1	4	3	3	2	3	1	1	1	1	1	6	1	1		0.9176	0.379478	0.849979	0.921065	0.655136	1.62774	0.849858	1.85655	0.976801
lpg1148, lpg1907, lpg2692, lpg2733	4	2	0	0	0	0	0	1	0	0	0	0	0	0	0	0	0	0	1	0		1	1	1	1	1	2	1	1	1	1	1	1	1	1	1	1	2	1		0.9176	0.379478	0.849979	0.921065	0.655136	0.813868	0.283286	0.61885	0.4884
lpg1148, lpg1959	2	9	0	0	0	0	0	3	10	4	4	9	0	0	0	0	1	3	1	3		1	1	1	1	1	4	11	5	5	10	1	1	1	1	2	4	2	4		0.9176	0.379478	0.849979	0.921065	0.655136	1.62774	3.11615	3.09425	2.442
lpg1148, lpg2223	2	7	0	0	0	0	0	8	3	0	10	4	0	0	0	0	3	5	0	4		1	1	1	1	1	9	4	1	11	5	1	1	1	1	4	6	1	5		0.9176	0.379478	0.849979	0.921065	0.655136	3.66241	1.13314	0.61885	5.37241
lpg1148, lpg2223, lpg2692, lpg2885, lpg3000	5	1	0	0	0	0	0	0	0	0	0	0	0	0	0	0	0	1	0	0		1	1	1	1	1	1	1	1	1	1	1	1	1	1	1	2	1	1		0.9176	0.379478	0.849979	0.921065	0.655136	0.406934	0.283286	0.61885	0.4884
lpg1148, lpg2271	2	1	0	0	0	0	0	0	0	24	0	0	0	0	0	0	0	0	0	0		1	1	1	1	1	1	1	25	1	1	1	1	1	1	1	1	1	1		0.9176	0.379478	0.849979	0.921065	0.655136	0.406934	0.283286	15.4713	0.4884
lpg1148, lpg2628, lpg2692, lpg2733	4	3	0	0	0	0	0	0	0	0	1	0	0	0	0	0	0	2	1	0		1	1	1	1	1	1	1	1	2	1	1	1	1	1	1	3	2	1		0.9176	0.379478	0.849979	0.921065	0.655136	0.406934	0.283286	0.61885	0.976801
lpg1148, lpg2692	2	1	0	0	0	0	0	0	1	0	0	0	0	0	0	0	0	0	0	0		1	1	1	1	1	1	2	1	1	1	1	1	1	1	1	1	1	1		0.9176	0.379478	0.849979	0.921065	0.655136	0.406934	0.566572	0.61885	0.4884
lpg1148, lpg2804, lpg2884, lpg2885	4	1	0	0	0	0	0	0	0	0	0	0	0	0	0	0	0	1	0	0		1	1	1	1	1	1	1	1	1	1	1	1	1	1	1	2	1	1		0.9176	0.379478	0.849979	0.921065	0.655136	0.406934	0.283286	0.61885	0.4884
lpg1148, lpg2815	2	6	0	0	0	0	0	5	0	0	7	0	0	0	0	0	9	2	4	4		1	1	1	1	1	6	1	1	8	1	1	1	1	1	10	3	5	5		0.9176	0.379478	0.849979	0.921065	0.655136	2.4416	0.283286	0.61885	3.9072
lpg1148, lpg2815, lpg3000	3	1	0	0	0	0	0	1	0	0	0	0	0	0	0	0	0	0	0	0		1	1	1	1	1	2	1	1	1	1	1	1	1	1	1	1	1	1		0.9176	0.379478	0.849979	0.921065	0.655136	0.813868	0.283286	0.61885	0.4884
lpg1148, lpg2885	2	6	0	0	0	0	0	4	2	2	0	0	0	0	0	0	4	4	1	0		1	1	1	1	1	5	3	3	1	1	1	1	1	1	5	5	2	1		0.9176	0.379478	0.849979	0.921065	0.655136	2.03467	0.849858	1.85655	0.4884
lpg1148, lpg2885, lpg2888	3	9	0	0	0	0	0	45	7	10	32	5	0	0	0	0	42	51	22	7		1	1	1	1	1	46	8	11	33	6	1	1	1	1	43	52	23	8		0.9176	0.379478	0.849979	0.921065	0.655136	18.719	2.26629	6.80735	16.1172
lpg1148, lpg2888	2	9	0	0	0	0	0	19	6	7	11	6	0	0	0	0	6	15	9	2		1	1	1	1	1	20	7	8	12	7	1	1	1	1	7	16	10	3		0.9176	0.379478	0.849979	0.921065	0.655136	8.13868	1.983	4.9508	5.86081
lpg1525	1	18	3	12	3	1	6	421	1113	507	382	792	4	7	7	7	388	718	243	396		4	13	4	2	7	422	1114	508	383	793	5	8	8	8	389	719	244	397		3.6704	4.93321	3.39992	1.84213	4.58595	171.726	315.581	314.376	187.057
lpg1525, lpg1527	2	8	0	0	0	0	0	6	2	2	2	4	0	0	0	0	1	0	1	2		1	1	1	1	1	7	3	3	3	5	1	1	1	1	2	1	2	3		0.9176	0.379478	0.849979	0.921065	0.655136	2.84854	0.849858	1.85655	1.4652
lpg1525, lpg1621	2	9	0	0	0	0	0	3	4	2	2	3	0	0	0	0	7	7	3	2		1	1	1	1	1	4	5	3	3	4	1	1	1	1	8	8	4	3		0.9176	0.379478	0.849979	0.921065	0.655136	1.62774	1.41643	1.85655	1.4652
lpg1525, lpg1621, lpg1701	3	5	0	2	0	1	2	0	1	0	0	0	0	0	0	2	0	0	0	0		1	3	1	2	3	1	2	1	1	1	1	1	1	3	1	1	1	1		0.9176	1.13843	0.849979	1.84213	1.96541	0.406934	0.566572	0.61885	0.4884
lpg1525, lpg1621, lpg1701, lpg1959, lpg2223, lpg2692, lpg2885, lpg2888, lpg3000	9	1	0	0	0	0	0	1	0	0	0	0	0	0	0	0	0	0	0	0		1	1	1	1	1	2	1	1	1	1	1	1	1	1	1	1	1	1		0.9176	0.379478	0.849979	0.921065	0.655136	0.813868	0.283286	0.61885	0.4884
lpg1525, lpg1621, lpg1701, lpg2271	4	1	0	0	0	0	0	0	0	0	0	0	0	0	0	0	0	1	0	0		1	1	1	1	1	1	1	1	1	1	1	1	1	1	1	2	1	1		0.9176	0.379478	0.849979	0.921065	0.655136	0.406934	0.283286	0.61885	0.4884
lpg1525, lpg1621, lpg1701, lpg2552	4	8	0	6	4	6	2	0	0	0	0	0	2	12	2	16	0	0	0	0		1	7	5	7	3	1	1	1	1	1	3	13	3	17	1	1	1	1		0.9176	2.65634	4.24989	6.44745	1.96541	0.406934	0.283286	0.61885	0.4884
lpg1525, lpg1621, lpg1959	3	9	0	0	0	0	0	33	87	27	18	42	0	0	0	0	36	69	18	32		1	1	1	1	1	34	88	28	19	43	1	1	1	1	37	70	19	33		0.9176	0.379478	0.849979	0.921065	0.655136	13.8358	24.9292	17.3278	9.27961
lpg1525, lpg1621, lpg2223, lpg2692, lpg2888, lpg3000	6	1	0	0	0	0	0	0	0	0	1	0	0	0	0	0	0	0	0	0		1	1	1	1	1	1	1	1	2	1	1	1	1	1	1	1	1	1		0.9176	0.379478	0.849979	0.921065	0.655136	0.406934	0.283286	0.61885	0.976801
lpg1525, lpg1621, lpg2271	3	1	0	0	0	0	0	0	0	0	0	0	0	0	0	0	0	0	0	1		1	1	1	1	1	1	1	1	1	1	1	1	1	1	1	1	1	2		0.9176	0.379478	0.849979	0.921065	0.655136	0.406934	0.283286	0.61885	0.4884
lpg1525, lpg1621, lpg2552	3	5	0	0	1	0	0	0	0	0	0	0	1	3	1	1	0	0	0	0		1	1	2	1	1	1	1	1	1	1	2	4	2	2	1	1	1	1		0.9176	0.379478	1.69996	0.921065	0.655136	0.406934	0.283286	0.61885	0.4884
lpg1525, lpg1661	2	7	0	0	0	0	0	2	14	2	3	4	0	0	0	0	0	2	0	2		1	1	1	1	1	3	15	3	4	5	1	1	1	1	1	3	1	3		0.9176	0.379478	0.849979	0.921065	0.655136	1.2208	4.24929	1.85655	1.9536
lpg1525, lpg1661, lpg1907	3	10	0	0	0	0	0	34	56	28	18	62	0	0	1	0	15	27	19	28		1	1	1	1	1	35	57	29	19	63	1	1	2	1	16	28	20	29		0.9176	0.379478	0.849979	0.921065	0.655136	14.2427	16.1473	17.9467	9.27961
lpg1525, lpg1661, lpg2584	3	1	0	0	0	0	0	0	1	0	0	0	0	0	0	0	0	0	0	0		1	1	1	1	1	1	2	1	1	1	1	1	1	1	1	1	1	1		0.9176	0.379478	0.849979	0.921065	0.655136	0.406934	0.566572	0.61885	0.4884
lpg1525, lpg1701	2	5	0	1	0	0	0	0	0	0	0	0	0	1	1	0	2	3	0	0		1	2	1	1	1	1	1	1	1	1	1	2	2	1	3	4	1	1		0.9176	0.758956	0.849979	0.921065	0.655136	0.406934	0.283286	0.61885	0.4884
lpg1525, lpg1701, lpg1702	3	3	0	0	0	0	0	0	3	0	0	0	0	0	0	0	0	2	0	3		1	1	1	1	1	1	4	1	1	1	1	1	1	1	1	3	1	4		0.9176	0.379478	0.849979	0.921065	0.655136	0.406934	1.13314	0.61885	0.4884
lpg1525, lpg1701, lpg1907	3	6	0	0	0	0	0	4	1	2	1	0	0	0	0	0	0	2	2	0		1	1	1	1	1	5	2	3	2	1	1	1	1	1	1	3	3	1		0.9176	0.379478	0.849979	0.921065	0.655136	2.03467	0.566572	1.85655	0.976801
lpg1525, lpg1701, lpg1959, lpg2223, lpg2885	5	1	0	0	0	0	0	0	0	0	0	0	0	0	0	0	0	0	1	0		1	1	1	1	1	1	1	1	1	1	1	1	1	1	1	1	2	1		0.9176	0.379478	0.849979	0.921065	0.655136	0.406934	0.283286	0.61885	0.4884
lpg1525, lpg1701, lpg2223, lpg2628, lpg2692, lpg3000	6	1	0	0	0	0	0	0	0	1	0	0	0	0	0	0	0	0	0	0		1	1	1	1	1	1	1	2	1	1	1	1	1	1	1	1	1	1		0.9176	0.379478	0.849979	0.921065	0.655136	0.406934	0.283286	1.2377	0.4884
lpg1525, lpg1701, lpg2552	3	4	2	1	0	0	0	0	0	0	0	0	0	0	1	3	0	0	0	0		3	2	1	1	1	1	1	1	1	1	1	1	2	4	1	1	1	1		2.7528	0.758956	0.849979	0.921065	0.655136	0.406934	0.283286	0.61885	0.4884
lpg1525, lpg1701, lpg2692	3	2	0	0	0	0	0	1	0	0	0	0	0	0	0	0	0	0	0	1		1	1	1	1	1	2	1	1	1	1	1	1	1	1	1	1	1	2		0.9176	0.379478	0.849979	0.921065	0.655136	0.813868	0.283286	0.61885	0.4884
lpg1525, lpg1702	2	2	0	0	0	0	0	0	1	0	0	0	0	0	0	0	0	0	0	1		1	1	1	1	1	1	2	1	1	1	1	1	1	1	1	1	1	2		0.9176	0.379478	0.849979	0.921065	0.655136	0.406934	0.566572	0.61885	0.4884
lpg1525, lpg1702, lpg2552, lpg2884	4	1	0	0	0	0	0	0	0	0	0	0	0	0	0	0	0	0	1	0		1	1	1	1	1	1	1	1	1	1	1	1	1	1	1	1	2	1		0.9176	0.379478	0.849979	0.921065	0.655136	0.406934	0.283286	0.61885	0.4884
lpg1525, lpg1776	2	9	3	23	6	5	4	0	0	0	0	0	2	14	6	14	0	0	0	0		4	24	7	6	5	1	1	1	1	1	3	15	7	15	1	1	1	1		3.6704	9.10747	5.94985	5.52639	3.27568	0.406934	0.283286	0.61885	0.4884
lpg1525, lpg1776, lpg2692	3	9	1	10	6	11	12	0	0	0	0	0	7	5	7	30	0	0	0	0		2	11	7	12	13	1	1	1	1	1	8	6	8	31	1	1	1	1		1.8352	4.17426	5.94985	11.0528	8.51677	0.406934	0.283286	0.61885	0.4884
lpg1525, lpg1776, lpg2884	3	2	1	0	0	0	0	0	0	0	0	0	0	0	1	0	0	0	0	0		2	1	1	1	1	1	1	1	1	1	1	1	2	1	1	1	1	1		1.8352	0.379478	0.849979	0.921065	0.655136	0.406934	0.283286	0.61885	0.4884
lpg1525, lpg1907	2	18	6	11	7	2	6	9	15	9	11	16	4	5	4	11	4	5	2	7		7	12	8	3	7	10	16	10	12	17	5	6	5	12	5	6	3	8		6.4232	4.55373	6.79983	2.76319	4.58595	4.06934	4.53258	6.1885	5.86081
lpg1525, lpg1907, lpg2584	3	10	29	129	55	37	40	0	0	0	0	0	68	64	51	85	0	0	1	0		30	130	56	38	41	1	1	1	1	1	69	65	52	86	1	1	2	1		27.528	49.3321	47.5988	35.0005	26.8606	0.406934	0.283286	0.61885	0.4884
lpg1525, lpg1907, lpg2628	3	9	0	0	0	0	0	3	17	3	15	48	0	0	0	0	2	5	1	7		1	1	1	1	1	4	18	4	16	49	1	1	1	1	3	6	2	8		0.9176	0.379478	0.849979	0.921065	0.655136	1.62774	5.09915	2.4754	7.81441
lpg1525, lpg1959	2	8	0	0	0	0	0	5	6	4	1	3	0	0	0	0	0	6	4	6		1	1	1	1	1	6	7	5	2	4	1	1	1	1	1	7	5	7		0.9176	0.379478	0.849979	0.921065	0.655136	2.4416	1.983	3.09425	0.976801
lpg1525, lpg2223	2	9	0	0	0	0	0	10	61	28	15	42	0	0	0	0	13	18	9	9		1	1	1	1	1	11	62	29	16	43	1	1	1	1	14	19	10	10		0.9176	0.379478	0.849979	0.921065	0.655136	4.47628	17.5637	17.9467	7.81441
lpg1525, lpg2223, lpg2552, lpg2692, lpg3000	5	1	0	0	0	0	0	0	1	0	0	0	0	0	0	0	0	0	0	0		1	1	1	1	1	1	2	1	1	1	1	1	1	1	1	1	1	1		0.9176	0.379478	0.849979	0.921065	0.655136	0.406934	0.566572	0.61885	0.4884
lpg1525, lpg2223, lpg2692	3	9	0	0	0	0	0	51	131	68	30	98	0	0	0	0	23	48	19	17		1	1	1	1	1	52	132	69	31	99	1	1	1	1	24	49	20	18		0.9176	0.379478	0.849979	0.921065	0.655136	21.1606	37.3938	42.7007	15.1404
lpg1525, lpg2223, lpg2692, lpg3000	4	10	0	0	0	0	0	359	1159	570	303	1029	0	0	1	0	295	473	162	265		1	1	1	1	1	360	1160	571	304	1030	1	1	2	1	296	474	163	266		0.9176	0.379478	0.849979	0.921065	0.655136	146.496	328.612	353.363	148.474
lpg1525, lpg2223, lpg2733, lpg2874	4	1	0	0	0	0	0	0	0	0	0	1	0	0	0	0	0	0	0	0		1	1	1	1	1	1	1	1	1	2	1	1	1	1	1	1	1	1		0.9176	0.379478	0.849979	0.921065	0.655136	0.406934	0.283286	0.61885	0.4884
lpg1525, lpg2223, lpg3000	3	10	0	0	0	0	0	77	316	118	67	218	0	0	1	0	51	108	40	44		1	1	1	1	1	78	317	119	68	219	1	1	2	1	52	109	41	45		0.9176	0.379478	0.849979	0.921065	0.655136	31.7409	89.8017	73.6432	33.2112
lpg1525, lpg2271	2	8	1	3	5	1	2	0	0	0	0	0	1	0	1	3	0	0	0	0		2	4	6	2	3	1	1	1	1	1	2	1	2	4	1	1	1	1		1.8352	1.51791	5.09987	1.84213	1.96541	0.406934	0.283286	0.61885	0.4884
lpg1525, lpg2271, lpg2692	3	9	2	13	9	6	13	0	0	0	0	0	3	7	11	12	0	0	0	0		3	14	10	7	14	1	1	1	1	1	4	8	12	13	1	1	1	1		2.7528	5.31269	8.49979	6.44745	9.17191	0.406934	0.283286	0.61885	0.4884
lpg1525, lpg2552	2	1	0	0	0	0	0	0	1	0	0	0	0	0	0	0	0	0	0	0		1	1	1	1	1	1	2	1	1	1	1	1	1	1	1	1	1	1		0.9176	0.379478	0.849979	0.921065	0.655136	0.406934	0.566572	0.61885	0.4884
lpg1525, lpg2584	2	18	5	21	9	6	4	6	12	6	7	9	5	5	4	4	6	3	1	4		6	22	10	7	5	7	13	7	8	10	6	6	5	5	7	4	2	5		5.5056	8.34851	8.49979	6.44745	3.27568	2.84854	3.68272	4.33195	3.9072
lpg1525, lpg2584, lpg2628	3	7	0	0	0	0	0	0	5	3	1	5	0	0	0	0	3	4	1	0		1	1	1	1	1	1	6	4	2	6	1	1	1	1	4	5	2	1		0.9176	0.379478	0.849979	0.921065	0.655136	0.406934	1.69972	2.4754	0.976801
lpg1525, lpg2628	2	7	0	0	0	0	0	3	4	3	3	4	0	0	0	0	0	1	0	3		1	1	1	1	1	4	5	4	4	5	1	1	1	1	1	2	1	4		0.9176	0.379478	0.849979	0.921065	0.655136	1.62774	1.41643	2.4754	1.9536
lpg1525, lpg2692	2	17	0	2	1	4	3	1	18	8	2	13	3	1	2	3	1	4	2	2		1	3	2	5	4	2	19	9	3	14	4	2	3	4	2	5	3	3		0.9176	1.13843	1.69996	4.60532	2.62055	0.813868	5.38244	5.56965	1.4652
lpg1525, lpg2692, lpg3000	3	9	0	0	0	0	0	30	93	39	35	58	0	0	0	0	19	33	10	11		1	1	1	1	1	31	94	40	36	59	1	1	1	1	20	34	11	12		0.9176	0.379478	0.849979	0.921065	0.655136	12.615	26.6289	24.754	17.5824
lpg1525, lpg2733	2	8	0	0	0	0	0	3	5	2	0	13	0	0	0	0	1	3	1	2		1	1	1	1	1	4	6	3	1	14	1	1	1	1	2	4	2	3		0.9176	0.379478	0.849979	0.921065	0.655136	1.62774	1.69972	1.85655	0.4884
lpg1525, lpg3000	2	9	0	0	0	0	0	10	59	22	7	32	0	0	0	0	20	15	4	8		1	1	1	1	1	11	60	23	8	33	1	1	1	1	21	16	5	9		0.9176	0.379478	0.849979	0.921065	0.655136	4.47628	16.9972	14.2336	3.9072
lpg1527	1	17	0	11	4	6	7	137	262	103	78	132	1	4	8	6	73	187	67	117		1	12	5	7	8	138	263	104	79	133	2	5	9	7	74	188	68	118		0.9176	4.55373	4.24989	6.44745	5.24109	56.1569	74.5042	64.3604	38.5836
lpg1527, lpg1621	2	9	0	0	0	0	0	7	44	14	5	10	0	0	0	0	7	8	6	4		1	1	1	1	1	8	45	15	6	11	1	1	1	1	8	9	7	5		0.9176	0.379478	0.849979	0.921065	0.655136	3.25547	12.7479	9.28275	2.9304
lpg1527, lpg1701	2	4	0	0	0	0	0	0	1	1	0	0	0	0	0	0	1	1	0	0		1	1	1	1	1	1	2	2	1	1	1	1	1	1	2	2	1	1		0.9176	0.379478	0.849979	0.921065	0.655136	0.406934	0.566572	1.2377	0.4884
lpg1527, lpg1701, lpg2223	3	3	0	0	0	0	0	0	2	0	0	2	0	0	0	0	0	0	0	1		1	1	1	1	1	1	3	1	1	3	1	1	1	1	1	1	1	2		0.9176	0.379478	0.849979	0.921065	0.655136	0.406934	0.849858	0.61885	0.4884
lpg1527, lpg1776, lpg2804	3	1	0	0	0	0	0	1	0	0	0	0	0	0	0	0	0	0	0	0		1	1	1	1	1	2	1	1	1	1	1	1	1	1	1	1	1	1		0.9176	0.379478	0.849979	0.921065	0.655136	0.813868	0.283286	0.61885	0.4884
lpg1527, lpg1959	2	10	3	9	9	1	1	0	0	0	0	0	1	6	2	10	1	0	0	0		4	10	10	2	2	1	1	1	1	1	2	7	3	11	2	1	1	1		3.6704	3.79478	8.49979	1.84213	1.31027	0.406934	0.283286	0.61885	0.4884
lpg1527, lpg1959, lpg2244	3	2	0	0	0	0	0	0	1	0	0	0	0	0	0	0	1	0	0	0		1	1	1	1	1	1	2	1	1	1	1	1	1	1	2	1	1	1		0.9176	0.379478	0.849979	0.921065	0.655136	0.406934	0.566572	0.61885	0.4884
lpg1527, lpg1959, lpg2244, lpg2584	4	6	0	0	0	0	0	4	2	0	1	0	0	0	0	0	0	1	1	2		1	1	1	1	1	5	3	1	2	1	1	1	1	1	1	2	2	3		0.9176	0.379478	0.849979	0.921065	0.655136	2.03467	0.849858	0.61885	0.976801
lpg1527, lpg1959, lpg2552	3	8	0	6	4	2	6	0	0	0	0	0	3	8	2	14	0	0	0	0		1	7	5	3	7	1	1	1	1	1	4	9	3	15	1	1	1	1		0.9176	2.65634	4.24989	2.76319	4.58595	0.406934	0.283286	0.61885	0.4884
lpg1527, lpg1959, lpg2733	3	3	0	1	0	0	0	0	0	0	0	0	1	1	0	0	0	0	0	0		1	2	1	1	1	1	1	1	1	1	2	2	1	1	1	1	1	1		0.9176	0.758956	0.849979	0.921065	0.655136	0.406934	0.283286	0.61885	0.4884
lpg1527, lpg2223	2	3	0	0	0	0	0	0	1	1	1	0	0	0	0	0	0	0	0	0		1	1	1	1	1	1	2	2	2	1	1	1	1	1	1	1	1	1		0.9176	0.379478	0.849979	0.921065	0.655136	0.406934	0.566572	1.2377	0.976801
lpg1527, lpg2244	2	1	0	0	0	0	0	0	0	0	0	0	0	0	0	1	0	0	0	0		1	1	1	1	1	1	1	1	1	1	1	1	1	2	1	1	1	1		0.9176	0.379478	0.849979	0.921065	0.655136	0.406934	0.283286	0.61885	0.4884
lpg1527, lpg2244, lpg2874	3	3	0	1	0	1	0	0	0	0	0	0	0	1	0	0	0	0	0	0		1	2	1	2	1	1	1	1	1	1	1	2	1	1	1	1	1	1		0.9176	0.758956	0.849979	1.84213	0.655136	0.406934	0.283286	0.61885	0.4884
lpg1527, lpg2244, lpg2874, lpg2885	4	5	0	2	0	0	1	0	0	0	0	0	0	1	5	8	0	0	0	0		1	3	1	1	2	1	1	1	1	1	1	2	6	9	1	1	1	1		0.9176	1.13843	0.849979	0.921065	1.31027	0.406934	0.283286	0.61885	0.4884
lpg1527, lpg2244, lpg2885	3	2	0	0	0	0	0	0	0	0	0	0	0	1	0	1	0	0	0	0		1	1	1	1	1	1	1	1	1	1	1	2	1	2	1	1	1	1		0.9176	0.379478	0.849979	0.921065	0.655136	0.406934	0.283286	0.61885	0.4884
lpg1527, lpg2552	2	4	0	0	0	1	2	0	0	0	0	0	0	4	0	1	0	0	0	0		1	1	1	2	3	1	1	1	1	1	1	5	1	2	1	1	1	1		0.9176	0.379478	0.849979	1.84213	1.96541	0.406934	0.283286	0.61885	0.4884
lpg1527, lpg2584	2	7	0	0	0	0	0	71	198	96	50	0	0	0	0	0	0	81	37	69		1	1	1	1	1	72	199	97	51	1	1	1	1	1	1	82	38	70		0.9176	0.379478	0.849979	0.921065	0.655136	29.2993	56.3739	60.0285	24.9084
lpg1527, lpg2584, lpg2804, lpg2884, lpg2885	5	1	0	0	0	0	0	0	0	0	0	0	0	0	0	0	0	0	1	0		1	1	1	1	1	1	1	1	1	1	1	1	1	1	1	1	2	1		0.9176	0.379478	0.849979	0.921065	0.655136	0.406934	0.283286	0.61885	0.4884
lpg1527, lpg2692	2	1	0	0	0	0	0	0	0	0	0	1	0	0	0	0	0	0	0	0		1	1	1	1	1	1	1	1	1	2	1	1	1	1	1	1	1	1		0.9176	0.379478	0.849979	0.921065	0.655136	0.406934	0.283286	0.61885	0.4884
lpg1527, lpg2733	2	3	1	0	0	0	0	0	0	0	1	0	0	0	0	1	0	0	0	0		2	1	1	1	1	1	1	1	2	1	1	1	1	2	1	1	1	1		1.8352	0.379478	0.849979	0.921065	0.655136	0.406934	0.283286	0.61885	0.976801
lpg1527, lpg2733, lpg2815	3	3	0	0	0	0	0	0	0	0	2	0	0	0	0	0	1	1	0	0		1	1	1	1	1	1	1	1	3	1	1	1	1	1	2	2	1	1		0.9176	0.379478	0.849979	0.921065	0.655136	0.406934	0.283286	0.61885	1.4652
lpg1527, lpg2804	2	9	0	0	0	0	0	25	16	7	13	14	0	0	0	0	12	29	8	10		1	1	1	1	1	26	17	8	14	15	1	1	1	1	13	30	9	11		0.9176	0.379478	0.849979	0.921065	0.655136	10.5803	4.81586	4.9508	6.83761
lpg1527, lpg2804, lpg2884	3	9	0	0	0	0	0	110	77	33	111	53	0	0	0	0	67	107	63	69		1	1	1	1	1	111	78	34	112	54	1	1	1	1	68	108	64	70		0.9176	0.379478	0.849979	0.921065	0.655136	45.1697	22.0963	21.0409	54.7009
lpg1527, lpg2804, lpg2885	3	1	0	0	0	0	0	0	0	0	0	0	0	0	0	0	0	0	0	1		1	1	1	1	1	1	1	1	1	1	1	1	1	1	1	1	1	2		0.9176	0.379478	0.849979	0.921065	0.655136	0.406934	0.283286	0.61885	0.4884
lpg1527, lpg2815	2	9	0	0	0	0	0	27	0	0	12	0	0	1	1	1	19	41	16	27		1	1	1	1	1	28	1	1	13	1	1	2	2	2	20	42	17	28		0.9176	0.379478	0.849979	0.921065	0.655136	11.3942	0.283286	0.61885	6.34921
lpg1527, lpg2815, lpg2884	3	5	1	0	0	0	0	0	0	0	0	0	5	6	2	2	0	0	0	0		2	1	1	1	1	1	1	1	1	1	6	7	3	3	1	1	1	1		1.8352	0.379478	0.849979	0.921065	0.655136	0.406934	0.283286	0.61885	0.4884
lpg1527, lpg2874	2	1	0	0	1	0	0	0	0	0	0	0	0	0	0	0	0	0	0	0		1	1	2	1	1	1	1	1	1	1	1	1	1	1	1	1	1	1		0.9176	0.379478	1.69996	0.921065	0.655136	0.406934	0.283286	0.61885	0.4884
lpg1527, lpg2874, lpg2885	3	1	0	0	0	0	0	0	0	0	0	0	0	0	1	0	0	0	0	0		1	1	1	1	1	1	1	1	1	1	1	1	2	1	1	1	1	1		0.9176	0.379478	0.849979	0.921065	0.655136	0.406934	0.283286	0.61885	0.4884
lpg1527, lpg2884	2	12	1	0	0	0	0	188	192	82	106	110	1	1	0	0	86	158	143	131		2	1	1	1	1	189	193	83	107	111	2	2	1	1	87	159	144	132		1.8352	0.379478	0.849979	0.921065	0.655136	76.9106	54.6742	51.3646	52.2589
lpg1527, lpg2888	2	1	0	0	0	0	0	0	0	0	0	0	0	0	0	22	0	0	0	0		1	1	1	1	1	1	1	1	1	1	1	1	1	23	1	1	1	1		0.9176	0.379478	0.849979	0.921065	0.655136	0.406934	0.283286	0.61885	0.4884
lpg1621	1	18	7	44	20	7	11	297	581	250	230	486	5	25	8	20	122	309	138	230		8	45	21	8	12	298	582	251	231	487	6	26	9	21	123	310	139	231		7.3408	17.0765	17.8496	7.36852	7.86164	121.266	164.873	155.331	112.821
lpg1621, lpg1689	2	3	0	0	0	0	0	1	0	0	0	4	0	0	0	0	0	0	0	2		1	1	1	1	1	2	1	1	1	5	1	1	1	1	1	1	1	3		0.9176	0.379478	0.849979	0.921065	0.655136	0.813868	0.283286	0.61885	0.4884
lpg1621, lpg1701	2	10	0	0	0	0	0	138	387	192	148	274	0	0	3	0	88	240	72	150		1	1	1	1	1	139	388	193	149	275	1	1	4	1	89	241	73	151		0.9176	0.379478	0.849979	0.921065	0.655136	56.5638	109.915	119.438	72.7717
lpg1621, lpg1701, lpg1776, lpg2884, lpg2888	5	1	0	0	0	0	0	1	0	0	0	0	0	0	0	0	0	0	0	0		1	1	1	1	1	2	1	1	1	1	1	1	1	1	1	1	1	1		0.9176	0.379478	0.849979	0.921065	0.655136	0.813868	0.283286	0.61885	0.4884
lpg1621, lpg1701, lpg1907	3	1	0	0	0	0	0	0	0	0	0	0	0	0	0	0	0	0	0	1		1	1	1	1	1	1	1	1	1	1	1	1	1	1	1	1	1	2		0.9176	0.379478	0.849979	0.921065	0.655136	0.406934	0.283286	0.61885	0.4884
lpg1621, lpg1701, lpg1907, lpg3000	4	6	0	0	0	0	0	0	1	2	1	2	0	0	0	0	1	1	0	0		1	1	1	1	1	1	2	3	2	3	1	1	1	1	2	2	1	1		0.9176	0.379478	0.849979	0.921065	0.655136	0.406934	0.566572	1.85655	0.976801
lpg1621, lpg1701, lpg1959	3	9	0	0	0	0	0	28	5	8	17	4	0	0	0	0	15	11	9	3		1	1	1	1	1	29	6	9	18	5	1	1	1	1	16	12	10	4		0.9176	0.379478	0.849979	0.921065	0.655136	11.8011	1.69972	5.56965	8.79121
lpg1621, lpg1701, lpg1959, lpg2692, lpg2885	5	1	0	0	0	0	0	0	0	0	0	0	0	0	0	0	1	0	0	0		1	1	1	1	1	1	1	1	1	1	1	1	1	1	2	1	1	1		0.9176	0.379478	0.849979	0.921065	0.655136	0.406934	0.283286	0.61885	0.4884
lpg1621, lpg1701, lpg1959, lpg2885	4	9	0	0	0	0	0	92	18	10	54	15	0	0	0	0	49	37	35	17		1	1	1	1	1	93	19	11	55	16	1	1	1	1	50	38	36	18		0.9176	0.379478	0.849979	0.921065	0.655136	37.8449	5.38244	6.80735	26.862
lpg1621, lpg1701, lpg1959, lpg2885, lpg2888	5	10	0	0	0	0	0	1114	258	132	712	181	0	0	3	0	746	442	442	233		1	1	1	1	1	1115	259	133	713	182	1	1	4	1	747	443	443	234		0.9176	0.379478	0.849979	0.921065	0.655136	453.732	73.3711	82.3071	348.23
lpg1621, lpg1701, lpg1959, lpg2888	4	10	0	0	0	0	0	86	25	16	84	19	0	0	1	0	73	41	47	26		1	1	1	1	1	87	26	17	85	20	1	1	2	1	74	42	48	27		0.9176	0.379478	0.849979	0.921065	0.655136	35.4033	7.36544	10.5205	41.514
lpg1621, lpg1701, lpg2223	3	1	0	0	0	0	0	0	0	0	0	0	0	0	0	0	1	0	0	0		1	1	1	1	1	1	1	1	1	1	1	1	1	1	2	1	1	1		0.9176	0.379478	0.849979	0.921065	0.655136	0.406934	0.283286	0.61885	0.4884
lpg1621, lpg1701, lpg2271	3	8	0	0	0	0	0	6	16	3	0	4	0	0	0	0	1	2	1	3		1	1	1	1	1	7	17	4	1	5	1	1	1	1	2	3	2	4		0.9176	0.379478	0.849979	0.921065	0.655136	2.84854	4.81586	2.4754	0.4884
lpg1621, lpg1701, lpg2552	3	5	0	1	1	0	0	0	0	0	0	0	0	1	2	4	0	0	0	0		1	2	2	1	1	1	1	1	1	1	1	2	3	5	1	1	1	1		0.9176	0.758956	1.69996	0.921065	0.655136	0.406934	0.283286	0.61885	0.4884
lpg1621, lpg1701, lpg2692	3	1	0	0	0	0	0	0	1	0	0	0	0	0	0	0	0	0	0	0		1	1	1	1	1	1	2	1	1	1	1	1	1	1	1	1	1	1		0.9176	0.379478	0.849979	0.921065	0.655136	0.406934	0.566572	0.61885	0.4884
lpg1621, lpg1701, lpg2885	3	8	0	0	0	0	0	11	1	0	11	2	0	0	0	0	9	6	8	1		1	1	1	1	1	12	2	1	12	3	1	1	1	1	10	7	9	2		0.9176	0.379478	0.849979	0.921065	0.655136	4.88321	0.566572	0.61885	5.86081
lpg1621, lpg1701, lpg2885, lpg2888	4	9	0	0	0	0	0	87	15	11	50	11	0	0	0	0	51	34	32	13		1	1	1	1	1	88	16	12	51	12	1	1	1	1	52	35	33	14		0.9176	0.379478	0.849979	0.921065	0.655136	35.8102	4.53258	7.4262	24.9084
lpg1621, lpg1701, lpg2888	3	9	0	0	0	0	0	16	3	3	11	2	0	0	0	0	14	5	12	1		1	1	1	1	1	17	4	4	12	3	1	1	1	1	15	6	13	2		0.9176	0.379478	0.849979	0.921065	0.655136	6.91788	1.13314	2.4754	5.86081
lpg1621, lpg1702	2	9	0	0	0	0	0	1	9	6	1	5	0	0	0	0	1	3	3	2		1	1	1	1	1	2	10	7	2	6	1	1	1	1	2	4	4	3		0.9176	0.379478	0.849979	0.921065	0.655136	0.813868	2.83286	4.33195	0.976801
lpg1621, lpg1702, lpg1907	3	1	0	0	0	0	0	0	0	0	0	0	0	0	0	0	0	1	0	0		1	1	1	1	1	1	1	1	1	1	1	1	1	1	1	2	1	1		0.9176	0.379478	0.849979	0.921065	0.655136	0.406934	0.283286	0.61885	0.4884
lpg1621, lpg1702, lpg1907, lpg1959	4	3	0	0	0	0	0	0	0	0	0	0	0	0	0	0	2	1	0	1		1	1	1	1	1	1	1	1	1	1	1	1	1	1	3	2	1	2		0.9176	0.379478	0.849979	0.921065	0.655136	0.406934	0.283286	0.61885	0.4884
lpg1621, lpg1702, lpg1907, lpg1959, lpg2815	5	6	0	0	0	0	0	1	0	0	5	0	0	0	0	0	1	2	2	2		1	1	1	1	1	2	1	1	6	1	1	1	1	1	2	3	3	3		0.9176	0.379478	0.849979	0.921065	0.655136	0.813868	0.283286	0.61885	2.9304
lpg1621, lpg1702, lpg1907, lpg2815	4	2	0	0	0	0	0	0	0	0	1	0	0	0	0	0	0	1	0	0		1	1	1	1	1	1	1	1	2	1	1	1	1	1	1	2	1	1		0.9176	0.379478	0.849979	0.921065	0.655136	0.406934	0.283286	0.61885	0.976801
lpg1621, lpg1702, lpg2244	3	9	0	0	0	0	0	7	17	10	6	5	0	0	0	0	5	7	3	8		1	1	1	1	1	8	18	11	7	6	1	1	1	1	6	8	4	9		0.9176	0.379478	0.849979	0.921065	0.655136	3.25547	5.09915	6.80735	3.4188
lpg1621, lpg1776	2	11	0	1	1	0	0	13	14	10	7	12	0	0	0	0	8	13	12	12		1	2	2	1	1	14	15	11	8	13	1	1	1	1	9	14	13	13		0.9176	0.758956	1.69996	0.921065	0.655136	5.69708	4.24929	6.80735	3.9072
lpg1621, lpg1776, lpg2884	3	10	0	0	0	0	0	91	79	61	53	58	0	0	1	0	59	94	73	82		1	1	1	1	1	92	80	62	54	59	1	1	2	1	60	95	74	83		0.9176	0.379478	0.849979	0.921065	0.655136	37.4379	22.6629	38.3687	26.3736
lpg1621, lpg1907	2	11	0	3	1	0	2	2	0	0	0	1	0	1	1	1	0	1	1	2		1	4	2	1	3	3	1	1	1	2	1	2	2	2	1	2	2	3		0.9176	1.51791	1.69996	0.921065	1.96541	1.2208	0.283286	0.61885	0.4884
lpg1621, lpg1907, lpg1959	3	3	0	0	0	0	0	1	0	0	0	0	0	0	0	0	1	2	0	0		1	1	1	1	1	2	1	1	1	1	1	1	1	1	2	3	1	1		0.9176	0.379478	0.849979	0.921065	0.655136	0.813868	0.283286	0.61885	0.4884
lpg1621, lpg1907, lpg1959, lpg2815	4	3	0	0	0	0	0	1	0	0	1	0	0	0	0	0	0	2	0	0		1	1	1	1	1	2	1	1	2	1	1	1	1	1	1	3	1	1		0.9176	0.379478	0.849979	0.921065	0.655136	0.813868	0.283286	0.61885	0.976801
lpg1621, lpg1907, lpg2815	3	1	0	0	0	0	0	0	0	0	0	0	0	0	0	0	0	1	0	0		1	1	1	1	1	1	1	1	1	1	1	1	1	1	1	2	1	1		0.9176	0.379478	0.849979	0.921065	0.655136	0.406934	0.283286	0.61885	0.4884
lpg1621, lpg1907, lpg3000	3	1	0	0	0	0	0	0	0	0	0	0	0	0	0	0	0	1	0	0		1	1	1	1	1	1	1	1	1	1	1	1	1	1	1	2	1	1		0.9176	0.379478	0.849979	0.921065	0.655136	0.406934	0.283286	0.61885	0.4884
lpg1621, lpg1959	2	16	1	10	1	0	0	14	51	20	6	18	1	7	1	1	17	24	9	9		2	11	2	1	1	15	52	21	7	19	2	8	2	2	18	25	10	10		1.8352	4.17426	1.69996	0.921065	0.655136	6.10401	14.7309	12.9959	3.4188
lpg1621, lpg1959, lpg2885	3	7	0	0	0	0	0	11	1	0	5	2	0	0	0	0	8	4	3	0		1	1	1	1	1	12	2	1	6	3	1	1	1	1	9	5	4	1		0.9176	0.379478	0.849979	0.921065	0.655136	4.88321	0.566572	0.61885	2.9304
lpg1621, lpg1959, lpg2885, lpg2888	4	9	0	0	0	0	0	70	17	10	58	5	0	0	0	0	41	25	23	17		1	1	1	1	1	71	18	11	59	6	1	1	1	1	42	26	24	18		0.9176	0.379478	0.849979	0.921065	0.655136	28.8923	5.09915	6.80735	28.8156
lpg1621, lpg1959, lpg2888	3	9	0	0	0	0	0	16	5	2	9	5	0	0	0	0	7	4	4	3		1	1	1	1	1	17	6	3	10	6	1	1	1	1	8	5	5	4		0.9176	0.379478	0.849979	0.921065	0.655136	6.91788	1.69972	1.85655	4.884
lpg1621, lpg2223, lpg2244, lpg2692, lpg3000	5	1	0	0	0	0	0	0	1	0	0	0	0	0	0	0	0	0	0	0		1	1	1	1	1	1	2	1	1	1	1	1	1	1	1	1	1	1		0.9176	0.379478	0.849979	0.921065	0.655136	0.406934	0.566572	0.61885	0.4884
lpg1621, lpg2244	2	9	0	0	0	0	0	56	127	57	67	134	0	0	0	0	23	75	20	39		1	1	1	1	1	57	128	58	68	135	1	1	1	1	24	76	21	40		0.9176	0.379478	0.849979	0.921065	0.655136	23.1952	36.2606	35.8933	33.2112
lpg1621, lpg2271	2	7	0	0	0	0	0	1	2	1	1	1	0	0	0	0	1	1	0	0		1	1	1	1	1	2	3	2	2	2	1	1	1	1	2	2	1	1		0.9176	0.379478	0.849979	0.921065	0.655136	0.813868	0.849858	1.2377	0.976801
lpg1621, lpg2552	2	11	0	0	0	0	0	2	4	1	3	3	0	2	0	1	2	1	1	1		1	1	1	1	1	3	5	2	4	4	1	3	1	2	3	2	2	2		0.9176	0.379478	0.849979	0.921065	0.655136	1.2208	1.41643	1.2377	1.9536
lpg1621, lpg2552, lpg2584	3	9	0	0	0	0	0	9	15	2	8	5	0	0	0	0	10	3	6	2		1	1	1	1	1	10	16	3	9	6	1	1	1	1	11	4	7	3		0.9176	0.379478	0.849979	0.921065	0.655136	4.06934	4.53258	1.85655	4.3956
lpg1621, lpg2552, lpg2584, lpg2874, lpg2884, lpg2885	6	1	0	0	0	0	0	0	1	0	0	0	0	0	0	0	0	0	0	0		1	1	1	1	1	1	2	1	1	1	1	1	1	1	1	1	1	1		0.9176	0.379478	0.849979	0.921065	0.655136	0.406934	0.566572	0.61885	0.4884
lpg1621, lpg2552, lpg2584, lpg2885	4	9	0	0	0	0	0	131	124	45	75	78	0	0	0	0	82	91	41	37		1	1	1	1	1	132	125	46	76	79	1	1	1	1	83	92	42	38		0.9176	0.379478	0.849979	0.921065	0.655136	53.7153	35.4108	28.4671	37.1184
lpg1621, lpg2552, lpg2885	3	10	0	0	0	0	0	19	25	4	9	7	0	0	1	0	6	9	9	3		1	1	1	1	1	20	26	5	10	8	1	1	2	1	7	10	10	4		0.9176	0.379478	0.849979	0.921065	0.655136	8.13868	7.36544	3.09425	4.884
lpg1621, lpg2584	2	8	0	0	0	0	0	7	6	0	3	2	0	0	0	0	8	8	2	4		1	1	1	1	1	8	7	1	4	3	1	1	1	1	9	9	3	5		0.9176	0.379478	0.849979	0.921065	0.655136	3.25547	1.983	0.61885	1.9536
lpg1621, lpg2584, lpg2815	3	6	0	0	0	0	0	7	0	0	5	0	0	0	0	0	5	6	2	3		1	1	1	1	1	8	1	1	6	1	1	1	1	1	6	7	3	4		0.9176	0.379478	0.849979	0.921065	0.655136	3.25547	0.283286	0.61885	2.9304
lpg1621, lpg2584, lpg2885	3	9	0	0	0	0	0	14	18	11	12	10	0	0	0	0	10	13	8	4		1	1	1	1	1	15	19	12	13	11	1	1	1	1	11	14	9	5		0.9176	0.379478	0.849979	0.921065	0.655136	6.10401	5.38244	7.4262	6.34921
lpg1621, lpg2628	2	9	0	0	0	0	0	18	53	24	20	48	0	0	0	0	6	29	8	19		1	1	1	1	1	19	54	25	21	49	1	1	1	1	7	30	9	20		0.9176	0.379478	0.849979	0.921065	0.655136	7.73175	15.2975	15.4713	10.2564
lpg1621, lpg2692	2	4	0	0	0	0	0	0	8	2	3	0	0	0	0	0	1	0	0	0		1	1	1	1	1	1	9	3	4	1	1	1	1	1	2	1	1	1		0.9176	0.379478	0.849979	0.921065	0.655136	0.406934	2.54958	1.85655	1.9536
lpg1621, lpg2806, lpg3000	3	1	0	0	0	0	0	0	0	0	0	3	0	0	0	0	0	0	0	0		1	1	1	1	1	1	1	1	1	4	1	1	1	1	1	1	1	1		0.9176	0.379478	0.849979	0.921065	0.655136	0.406934	0.283286	0.61885	0.4884
lpg1621, lpg2815	2	9	0	0	0	1	0	1	0	0	1	0	1	1	3	0	0	2	1	3		1	1	1	2	1	2	1	1	2	1	2	2	4	1	1	3	2	4		0.9176	0.379478	0.849979	1.84213	0.655136	0.813868	0.283286	0.61885	0.976801
lpg1621, lpg2884	2	9	0	0	0	0	0	9	14	6	5	4	0	0	0	0	3	7	13	7		1	1	1	1	1	10	15	7	6	5	1	1	1	1	4	8	14	8		0.9176	0.379478	0.849979	0.921065	0.655136	4.06934	4.24929	4.33195	2.9304
lpg1621, lpg2885	2	9	0	0	0	0	0	8	8	1	4	8	0	0	0	0	5	4	4	3		1	1	1	1	1	9	9	2	5	9	1	1	1	1	6	5	5	4		0.9176	0.379478	0.849979	0.921065	0.655136	3.66241	2.54958	1.2377	2.442
lpg1621, lpg2885, lpg2888	3	9	0	0	0	0	0	15	3	2	10	3	0	0	0	0	9	8	9	3		1	1	1	1	1	16	4	3	11	4	1	1	1	1	10	9	10	4		0.9176	0.379478	0.849979	0.921065	0.655136	6.51095	1.13314	1.85655	5.37241
lpg1621, lpg2888	2	8	0	0	0	0	0	3	4	2	3	0	0	0	0	0	3	3	2	2		1	1	1	1	1	4	5	3	4	1	1	1	1	1	4	4	3	3		0.9176	0.379478	0.849979	0.921065	0.655136	1.62774	1.41643	1.85655	1.9536
lpg1661	1	18	18	56	19	18	5	69	134	58	42	65	28	29	30	33	118	188	29	60		19	57	20	19	6	70	135	59	43	66	29	30	31	34	119	189	30	61		17.4344	21.6302	16.9996	17.5002	3.93082	28.4854	38.2436	36.5122	21.0012
lpg1661, lpg1689	2	2	0	0	0	0	0	0	1	0	0	0	0	0	0	0	0	0	1	0		1	1	1	1	1	1	2	1	1	1	1	1	1	1	1	1	2	1		0.9176	0.379478	0.849979	0.921065	0.655136	0.406934	0.566572	0.61885	0.4884
lpg1661, lpg1689, lpg1701	3	6	0	0	0	0	0	2	7	1	0	5	0	0	0	0	0	0	2	3		1	1	1	1	1	3	8	2	1	6	1	1	1	1	1	1	3	4		0.9176	0.379478	0.849979	0.921065	0.655136	1.2208	2.26629	1.2377	0.4884
lpg1661, lpg1689, lpg1701, lpg2244, lpg2552	5	1	0	0	0	0	0	0	0	0	1	0	0	0	0	0	0	0	0	0		1	1	1	1	1	1	1	1	2	1	1	1	1	1	1	1	1	1		0.9176	0.379478	0.849979	0.921065	0.655136	0.406934	0.283286	0.61885	0.976801
lpg1661, lpg1689, lpg1701, lpg2552	4	10	0	0	0	0	0	5	26	13	8	17	0	0	1	0	12	11	7	10		1	1	1	1	1	6	27	14	9	18	1	1	2	1	13	12	8	11		0.9176	0.379478	0.849979	0.921065	0.655136	2.4416	7.64873	8.6639	4.3956
lpg1661, lpg1689, lpg1701, lpg2552, lpg2885	5	1	0	0	0	0	0	0	0	0	0	1	0	0	0	0	0	0	0	0		1	1	1	1	1	1	1	1	1	2	1	1	1	1	1	1	1	1		0.9176	0.379478	0.849979	0.921065	0.655136	0.406934	0.283286	0.61885	0.4884
lpg1661, lpg1689, lpg2223, lpg2804	4	1	0	0	0	0	0	0	0	0	0	0	0	0	0	1	0	0	0	0		1	1	1	1	1	1	1	1	1	1	1	1	1	2	1	1	1	1		0.9176	0.379478	0.849979	0.921065	0.655136	0.406934	0.283286	0.61885	0.4884
lpg1661, lpg1689, lpg2552	3	6	0	0	0	0	0	2	1	1	0	3	0	0	0	0	2	0	0	2		1	1	1	1	1	3	2	2	1	4	1	1	1	1	3	1	1	3		0.9176	0.379478	0.849979	0.921065	0.655136	1.2208	0.566572	1.2377	0.4884
lpg1661, lpg1701	2	10	0	0	0	0	0	59	188	85	31	105	0	0	1	0	32	124	24	61		1	1	1	1	1	60	189	86	32	106	1	1	2	1	33	125	25	62		0.9176	0.379478	0.849979	0.921065	0.655136	24.416	53.5411	53.2211	15.6288
lpg1661, lpg1701, lpg1776	3	9	0	0	0	0	0	3	15	9	3	1	0	0	0	0	6	18	3	6		1	1	1	1	1	4	16	10	4	2	1	1	1	1	7	19	4	7		0.9176	0.379478	0.849979	0.921065	0.655136	1.62774	4.53258	6.1885	1.9536
lpg1661, lpg1701, lpg2223	3	2	0	4	0	0	1	0	0	0	0	0	0	0	0	0	0	0	0	0		1	5	1	1	2	1	1	1	1	1	1	1	1	1	1	1	1	1		0.9176	1.89739	0.849979	0.921065	1.31027	0.406934	0.283286	0.61885	0.4884
lpg1661, lpg1701, lpg2223, lpg2733	4	4	0	9	2	0	3	0	0	0	0	0	0	0	0	5	0	0	0	0		1	10	3	1	4	1	1	1	1	1	1	1	1	6	1	1	1	1		0.9176	3.79478	2.54994	0.921065	2.62055	0.406934	0.283286	0.61885	0.4884
lpg1661, lpg1701, lpg2552	3	5	0	0	0	0	0	0	3	3	0	0	0	0	0	0	1	1	0	5		1	1	1	1	1	1	4	4	1	1	1	1	1	1	2	2	1	6		0.9176	0.379478	0.849979	0.921065	0.655136	0.406934	1.13314	2.4754	0.4884
lpg1661, lpg1701, lpg2552, lpg2733	4	8	0	0	0	0	0	0	4	1	2	1	0	0	0	0	1	2	1	7		1	1	1	1	1	1	5	2	3	2	1	1	1	1	2	3	2	8		0.9176	0.379478	0.849979	0.921065	0.655136	0.406934	1.41643	1.2377	1.4652
lpg1661, lpg1701, lpg2584, lpg2628, lpg2874, lpg2885	6	1	0	0	0	0	0	0	0	0	1	0	0	0	0	0	0	0	0	0		1	1	1	1	1	1	1	1	2	1	1	1	1	1	1	1	1	1		0.9176	0.379478	0.849979	0.921065	0.655136	0.406934	0.283286	0.61885	0.976801
lpg1661, lpg1701, lpg2733	3	6	0	0	0	0	0	1	5	3	0	2	0	0	0	0	0	1	0	1		1	1	1	1	1	2	6	4	1	3	1	1	1	1	1	2	1	2		0.9176	0.379478	0.849979	0.921065	0.655136	0.813868	1.69972	2.4754	0.4884
lpg1661, lpg1701, lpg2888	3	9	0	0	0	0	0	58	39	26	55	35	0	0	0	0	36	62	21	26		1	1	1	1	1	59	40	27	56	36	1	1	1	1	37	63	22	27		0.9176	0.379478	0.849979	0.921065	0.655136	24.0091	11.3314	16.709	27.3504
lpg1661, lpg1702	2	7	0	0	0	0	0	1	3	0	2	1	0	0	0	0	0	3	1	1		1	1	1	1	1	2	4	1	3	2	1	1	1	1	1	4	2	2		0.9176	0.379478	0.849979	0.921065	0.655136	0.813868	1.13314	0.61885	1.4652
lpg1661, lpg1702, lpg2804, lpg2884, lpg2885	5	1	0	0	0	0	0	0	0	0	0	0	0	0	0	0	1	0	0	0		1	1	1	1	1	1	1	1	1	1	1	1	1	1	2	1	1	1		0.9176	0.379478	0.849979	0.921065	0.655136	0.406934	0.283286	0.61885	0.4884
lpg1661, lpg1702, lpg2885	3	1	0	0	0	0	0	0	0	0	0	0	0	0	0	0	1	0	0	0		1	1	1	1	1	1	1	1	1	1	1	1	1	1	2	1	1	1		0.9176	0.379478	0.849979	0.921065	0.655136	0.406934	0.283286	0.61885	0.4884
lpg1661, lpg1702, lpg2888	3	10	0	0	0	0	0	6	11	3	7	6	0	0	1	0	6	7	7	5		1	1	1	1	1	7	12	4	8	7	1	1	2	1	7	8	8	6		0.9176	0.379478	0.849979	0.921065	0.655136	2.84854	3.39943	2.4754	3.9072
lpg1661, lpg1776	2	3	0	0	0	0	0	0	1	0	2	0	0	0	0	0	0	0	1	0		1	1	1	1	1	1	2	1	3	1	1	1	1	1	1	1	2	1		0.9176	0.379478	0.849979	0.921065	0.655136	0.406934	0.566572	0.61885	1.4652
lpg1661, lpg1907	2	18	15	72	31	46	11	44	114	70	66	131	69	10	60	23	211	101	22	52		16	73	32	47	12	45	115	71	67	132	70	11	61	24	212	102	23	53		14.6816	27.7019	27.1993	43.29	7.86164	18.312	32.5779	43.9384	32.7228
lpg1661, lpg2223	2	10	37	190	106	50	58	0	0	0	0	0	22	114	26	203	0	0	1	0		38	191	107	51	59	1	1	1	1	1	23	115	27	204	1	1	2	1		34.8688	72.4803	90.9477	46.9743	38.653	0.406934	0.283286	0.61885	0.4884
lpg1661, lpg2223, lpg2552, lpg2692	4	1	0	0	0	0	0	0	0	0	0	0	0	0	0	1	0	0	0	0		1	1	1	1	1	1	1	1	1	1	1	1	1	2	1	1	1	1		0.9176	0.379478	0.849979	0.921065	0.655136	0.406934	0.283286	0.61885	0.4884
lpg1661, lpg2223, lpg2733	3	2	0	0	1	0	0	0	0	0	0	0	1	0	0	0	0	0	0	0		1	1	2	1	1	1	1	1	1	1	2	1	1	1	1	1	1	1		0.9176	0.379478	1.69996	0.921065	0.655136	0.406934	0.283286	0.61885	0.4884
lpg1661, lpg2244	2	7	0	1	0	0	1	0	1	2	1	0	0	0	0	3	0	0	0	3		1	2	1	1	2	1	2	3	2	1	1	1	1	4	1	1	1	4		0.9176	0.758956	0.849979	0.921065	1.31027	0.406934	0.566572	1.85655	0.976801
lpg1661, lpg2244, lpg2733	3	4	0	8	0	0	1	0	0	0	0	0	0	0	1	5	0	0	0	0		1	9	1	1	2	1	1	1	1	1	1	1	2	6	1	1	1	1		0.9176	3.4153	0.849979	0.921065	1.31027	0.406934	0.283286	0.61885	0.4884
lpg1661, lpg2271	2	6	0	0	0	0	0	0	4	2	4	3	0	0	0	0	4	3	0	0		1	1	1	1	1	1	5	3	5	4	1	1	1	1	5	4	1	1		0.9176	0.379478	0.849979	0.921065	0.655136	0.406934	1.41643	1.85655	2.442
lpg1661, lpg2271, lpg2888	3	9	0	0	0	0	0	18	19	5	8	8	0	0	0	0	16	18	10	2		1	1	1	1	1	19	20	6	9	9	1	1	1	1	17	19	11	3		0.9176	0.379478	0.849979	0.921065	0.655136	7.73175	5.66572	3.7131	4.3956
lpg1661, lpg2552	2	9	0	0	0	0	0	15	18	1	5	7	0	0	0	0	7	11	8	9		1	1	1	1	1	16	19	2	6	8	1	1	1	1	8	12	9	10		0.9176	0.379478	0.849979	0.921065	0.655136	6.51095	5.38244	1.2377	2.9304
lpg1661, lpg2552, lpg2692	3	9	0	0	0	0	0	31	16	8	22	10	0	0	0	0	25	17	15	9		1	1	1	1	1	32	17	9	23	11	1	1	1	1	26	18	16	10		0.9176	0.379478	0.849979	0.921065	0.655136	13.0219	4.81586	5.56965	11.2332
lpg1661, lpg2552, lpg2692, lpg2885	4	9	0	0	0	0	0	334	113	87	195	112	0	0	0	0	186	208	130	115		1	1	1	1	1	335	114	88	196	113	1	1	1	1	187	209	131	116		0.9176	0.379478	0.849979	0.921065	0.655136	136.323	32.2946	54.4588	95.7265
lpg1661, lpg2552, lpg2885	3	9	0	0	0	0	0	76	28	21	41	15	0	0	0	0	36	41	16	18		1	1	1	1	1	77	29	22	42	16	1	1	1	1	37	42	17	19		0.9176	0.379478	0.849979	0.921065	0.655136	31.3339	8.2153	13.6147	20.5128
lpg1661, lpg2584	2	9	0	0	0	0	0	28	30	8	18	12	0	0	0	0	11	12	6	14		1	1	1	1	1	29	31	9	19	13	1	1	1	1	12	13	7	15		0.9176	0.379478	0.849979	0.921065	0.655136	11.8011	8.78187	5.56965	9.27961
lpg1661, lpg2584, lpg2885	3	9	0	0	0	0	0	220	168	60	157	101	0	0	0	0	86	163	111	114		1	1	1	1	1	221	169	61	158	102	1	1	1	1	87	164	112	115		0.9176	0.379478	0.849979	0.921065	0.655136	89.9324	47.8754	37.7499	77.1673
lpg1661, lpg2692	2	9	0	0	0	0	0	7	3	1	2	1	0	0	0	0	4	4	1	1		1	1	1	1	1	8	4	2	3	2	1	1	1	1	5	5	2	2		0.9176	0.379478	0.849979	0.921065	0.655136	3.25547	1.13314	1.2377	1.4652
lpg1661, lpg2692, lpg2885	3	9	0	0	0	0	0	27	9	5	19	10	0	0	0	0	23	29	12	7		1	1	1	1	1	28	10	6	20	11	1	1	1	1	24	30	13	8		0.9176	0.379478	0.849979	0.921065	0.655136	11.3942	2.83286	3.7131	9.76801
lpg1661, lpg2733	2	12	4	21	14	6	7	0	0	2	0	0	3	13	7	13	0	0	1	1		5	22	15	7	8	1	1	3	1	1	4	14	8	14	1	1	2	2		4.588	8.34851	12.7497	6.44745	5.24109	0.406934	0.283286	1.85655	0.4884
lpg1661, lpg2804	2	6	0	0	0	0	0	4	4	2	2	0	0	0	0	0	211	185	0	0		1	1	1	1	1	5	5	3	3	1	1	1	1	1	212	186	1	1		0.9176	0.379478	0.849979	0.921065	0.655136	2.03467	1.41643	1.85655	1.4652
lpg1661, lpg2804, lpg3000	3	1	0	0	0	0	0	0	0	0	0	0	0	0	0	0	1	0	0	0		1	1	1	1	1	1	1	1	1	1	1	1	1	1	2	1	1	1		0.9176	0.379478	0.849979	0.921065	0.655136	0.406934	0.283286	0.61885	0.4884
lpg1661, lpg2874	2	6	0	1	1	0	0	0	9	0	4	0	0	1	0	0	0	0	3	0		1	2	2	1	1	1	10	1	5	1	1	2	1	1	1	1	4	1		0.9176	0.758956	1.69996	0.921065	0.655136	0.406934	2.83286	0.61885	2.442
lpg1661, lpg2885	2	9	0	0	0	0	0	51	30	17	26	18	0	0	0	0	20	25	24	18		1	1	1	1	1	52	31	18	27	19	1	1	1	1	21	26	25	19		0.9176	0.379478	0.849979	0.921065	0.655136	21.1606	8.78187	11.1393	13.1868
lpg1661, lpg2888	2	9	0	0	0	0	0	5	5	2	7	7	0	0	0	0	2	10	3	3		1	1	1	1	1	6	6	3	8	8	1	1	1	1	3	11	4	4		0.9176	0.379478	0.849979	0.921065	0.655136	2.4416	1.69972	1.85655	3.9072
lpg1689	1	18	18	100	29	13	16	21	59	36	10	20	7	34	11	48	5	37	14	31		19	101	30	14	17	22	60	37	11	21	8	35	12	49	6	38	15	32		17.4344	38.3273	25.4994	12.8949	11.1373	8.95255	16.9972	22.8975	5.37241
lpg1689, lpg1701	2	4	0	0	0	0	0	0	2	1	0	1	0	0	0	0	0	0	0	1		1	1	1	1	1	1	3	2	1	2	1	1	1	1	1	1	1	2		0.9176	0.379478	0.849979	0.921065	0.655136	0.406934	0.849858	1.2377	0.4884
lpg1689, lpg1701, lpg1702	3	9	0	0	0	0	0	2	18	4	1	1	0	0	0	0	1	1	2	2		1	1	1	1	1	3	19	5	2	2	1	1	1	1	2	2	3	3		0.9176	0.379478	0.849979	0.921065	0.655136	1.2208	5.38244	3.09425	0.976801
lpg1689, lpg1701, lpg1959, lpg2244, lpg2884	5	2	0	1	0	0	0	0	0	0	0	0	0	1	0	0	0	0	0	0		1	2	1	1	1	1	1	1	1	1	1	2	1	1	1	1	1	1		0.9176	0.758956	0.849979	0.921065	0.655136	0.406934	0.283286	0.61885	0.4884
lpg1689, lpg1701, lpg2552	3	6	0	0	0	0	0	1	0	0	1	0	0	0	0	0	1	1	1	1		1	1	1	1	1	2	1	1	2	1	1	1	1	1	2	2	2	2		0.9176	0.379478	0.849979	0.921065	0.655136	0.813868	0.283286	0.61885	0.976801
lpg1689, lpg1702	2	5	0	0	0	0	0	1	6	0	1	2	0	0	0	0	0	3	0	0		1	1	1	1	1	2	7	1	2	3	1	1	1	1	1	4	1	1		0.9176	0.379478	0.849979	0.921065	0.655136	0.813868	1.983	0.61885	0.976801
lpg1689, lpg1776	2	9	0	0	0	0	0	2	10	4	1	5	0	0	0	0	1	4	1	2		1	1	1	1	1	3	11	5	2	6	1	1	1	1	2	5	2	3		0.9176	0.379478	0.849979	0.921065	0.655136	1.2208	3.11615	3.09425	0.976801
lpg1689, lpg1907	2	3	0	3	0	0	0	0	0	0	0	0	0	0	2	4	0	0	0	0		1	4	1	1	1	1	1	1	1	1	1	1	3	5	1	1	1	1		0.9176	1.51791	0.849979	0.921065	0.655136	0.406934	0.283286	0.61885	0.4884
lpg1689, lpg1959, lpg2244, lpg2884	4	1	0	0	0	0	0	0	0	0	0	0	0	0	0	1	0	0	0	0		1	1	1	1	1	1	1	1	1	1	1	1	1	2	1	1	1	1		0.9176	0.379478	0.849979	0.921065	0.655136	0.406934	0.283286	0.61885	0.4884
lpg1689, lpg2223	2	1	1	0	0	0	0	0	0	0	0	0	0	0	0	0	0	0	0	0		2	1	1	1	1	1	1	1	1	1	1	1	1	1	1	1	1	1		1.8352	0.379478	0.849979	0.921065	0.655136	0.406934	0.283286	0.61885	0.4884
lpg1689, lpg2223, lpg2806	3	1	1	0	0	0	0	0	0	0	0	0	0	0	0	0	0	0	0	0		2	1	1	1	1	1	1	1	1	1	1	1	1	1	1	1	1	1		1.8352	0.379478	0.849979	0.921065	0.655136	0.406934	0.283286	0.61885	0.4884
lpg1689, lpg2552	2	2	0	0	0	0	0	0	3	0	0	0	0	0	0	0	1	0	0	0		1	1	1	1	1	1	4	1	1	1	1	1	1	1	2	1	1	1		0.9176	0.379478	0.849979	0.921065	0.655136	0.406934	1.13314	0.61885	0.4884
[truncated: 314 more rows]
[truncated: 19 more columns]

## Sheet: File 1e
File 1e: Subset data for all hits identified in U937 macrophage infection experiments
		INPUT RAW COUNTS					FOLD REDUCTION
Spacer combinations (hits in orange)	Number of Spacers in Array	U-1A	U-1B	U-2A	U-2B		U-1A-T1	U-1A-T2	U-1B	U-2A-T1	U-2A-T2	U-2B
lpg0059, lpg1621, lpg1702, lpg1907, lpg1959	5	0	0	8	11		2.41806	1.07956	1.40591	12.9283	5.91808	15.3975
lpg0059, lpg1621, lpg1702, lpg1907	4	0	0	3	0		2.41806	1.07956	1.40591	5.74591	2.63026	1.28313
lpg0059, lpg1621, lpg1702, lpg1959	4	0	0	2	1		2.41806	1.07956	1.40591	4.30943	1.97269	2.56625
lpg0059, lpg1621, lpg1907, lpg1959	4	0	0	2	0		2.41806	1.07956	1.40591	4.30943	1.97269	1.28313
lpg0059, lpg1702, lpg1907, lpg1959	4	0	0	1	1		2.41806	1.07956	1.40591	2.87296	1.31513	2.56625
lpg1621, lpg1702, lpg1907, lpg1959	4	not found in any experiment
lpg0059, lpg1621, lpg1702	3	0	0	1	0		2.41806	1.07956	1.40591	2.87296	1.31513	1.28313
lpg0059, lpg1621, lpg1907	3	6	6	0	0		0.735931	0.581299	0.615087	0.478826	0.657565	0.641563
lpg0059, lpg1621, lpg1959	3	0	0	89	43		2.41806	1.07956	1.40591	0.513028	0.5284	0.490935
lpg0059, lpg1702, lpg1907	3	not found in any experiment
lpg0059, lpg1702, lpg1959	3	not found in any experiment
lpg0059, lpg1907, lpg1959	3	not found in any experiment
lpg1621, lpg1702, lpg1907	3	not found in any experiment
lpg1621, lpg1702, lpg1959	3	not found in any experiment
lpg1621, lpg1907, lpg1959	3	0	0	1	0		2.41806	1.07956	1.40591	2.87296	1.31513	1.28313
lpg1702, lpg1907, lpg1959	3	0	0	1	0		2.41806	1.07956	1.40591	2.87296	1.31513	1.28313
lpg0059, lpg1621	2	0	0	7	4		0.40301	0.539778	0.702957	0.522355	0.438377	0.534636
lpg0059, lpg1702	2	not found in any experiment
lpg0059, lpg1907	2	0	1	0	1		0.345437	0.359852	2.81183	1.43648	0.657565	1.28313
lpg0059, lpg1959	2	0	0	9	4		2.41806	1.07956	1.40591	0.598532	0.469689	0.37739
lpg1621, lpg1702	2	0	0	1	1		2.41806	1.07956	1.40591	0.287296	0.187876	0.427709
lpg1621, lpg1907	2	0	0	2	0		0.604515	0.539778	0.468638	4.30943	1.97269	0.641563
lpg1621, lpg1959	2	1	0	14	6		0.439647	1.07956	1.40591	0.414369	0.469689	0.472731
lpg1702, lpg1907	2	0	0	7	3		2.41806	1.07956	1.40591	2.87296	2.63026	5.1325
lpg1702, lpg1959	2	not found in any experiment
lpg1907, lpg1959	2	not found in any experiment
lpg0059	1	109	160	98	75		0.469941	0.579274	0.820116	0.573433	0.538008	0.570278
lpg1621	1	7	7	297	230		0.429877	0.411259	0.937275	0.735516	0.780695	0.608628
lpg1702	1	3	5	18	12		0.690874	0.616889	1.05443	0.634723	0.734925	0.538085
lpg1907	1	20	33	78	77		0.488262	0.839655	1.91204	0.578988	0.763936	0.84104
lpg1959	1	7	9	20	16		0.967223	0.616889	3.51478	0.655783	1.53432	1.36332
lpg0086, lpg0107, lpg0404, lpg1137, lpg2733	5	0	0	72	73		2.41806	1.07956	1.40591	6.55393	8.00037	5.58537
lpg0086, lpg0107, lpg0404, lpg1137	4	0	0	21	15		2.41806	1.07956	1.40591	15.8013	14.4664	4.106
lpg0086, lpg0107, lpg0404, lpg2733	4	0	0	6	6		2.41806	1.07956	1.40591	5.02767	4.60295	4.49094
lpg0086, lpg0107, lpg1137, lpg2733	4	0	0	6	4		2.41806	1.07956	1.40591	10.0553	2.30148	6.41563
lpg0086, lpg0404, lpg1137, lpg2733	4	0	0	8	2		2.41806	1.07956	1.40591	4.30943	5.91808	3.84938
lpg0107, lpg0404, lpg1137, lpg2733	4	0	0	5	2		2.41806	1.07956	1.40591	4.30943	3.94539	3.84938
lpg0086, lpg0107, lpg0404	3	0	0	9	8		2.41806	1.07956	1.40591	4.78826	6.57565	11.5481
lpg0086, lpg0107, lpg1137	3	0	0	2	2		2.41806	1.07956	1.40591	2.15472	1.97269	3.84938
lpg0086, lpg0107, lpg2733	3	not found in any experiment
lpg0086, lpg0404, lpg1137	3	0	0	2	0		2.41806	1.07956	1.40591	2.15472	0.986347	1.28313
lpg0086, lpg0404, lpg2733	3	0	0	0	1		2.41806	1.07956	1.40591	1.43648	0.657565	2.56625
lpg0086, lpg1137, lpg2733	3	not found in any experiment
lpg0107, lpg0404, lpg1137	3	0	0	6	2		2.41806	1.07956	1.40591	3.35178	4.60295	3.84938
lpg0107, lpg0404, lpg2733	3	0	0	1	2		2.41806	1.07956	1.40591	2.87296	1.31513	3.84938
lpg0107, lpg1137, lpg2733	3	0	0	2	1		2.41806	1.07956	1.40591	4.30943	1.97269	2.56625
lpg0404, lpg1137, lpg2733	3	not found in any experiment
lpg0086, lpg0107	2	0	0	1	2		2.41806	1.07956	1.40591	2.87296	1.31513	3.84938
lpg0086, lpg0404	2	not found in any experiment
lpg0086, lpg1137	2	0	0	0	1		2.41806	1.07956	1.40591	1.43648	0.657565	2.56625
lpg0086, lpg2733	2	0	0	5	7		2.41806	1.07956	1.40591	1.43648	1.31513	2.56625
lpg0107, lpg0404	2	0	0	3	1		2.41806	1.07956	1.40591	5.74591	2.63026	2.56625
lpg0107, lpg1137	2	not found in any experiment
lpg0107, lpg2733	2	2	5	3	11		0.290167	0.539778	0.702957	0.359119	0.526052	0.699887
lpg0404, lpg1137	2	0	0	0	2		2.41806	1.07956	1.40591	1.43648	0.657565	1.92469
lpg0404, lpg2733	2	not found in any experiment
lpg1137, lpg2733	2	0	0	0	1		2.41806	1.07956	0.468638	1.43648	0.657565	1.28313
lpg0086	1	33	31	33	28		10.2767	36.7049	22.4946	1.57549	3.7262	2.06726
lpg0107	1	9	9	82	64		0.604515	0.719704	7.02957	0.624228	0.551292	0.617801
lpg0404	1	2	3	32	40		7.25418	3.23867	5.62365	4.74038	3.61661	3.50721
lpg1137	1	22	7	11	1		5.56153	2.25725	1.60676	0.783533	1.31513	0.285139
lpg2733	1	6	4	12	10		0.483612	0.503793	0.585797	0.746968	0.427417	0.672113
lpg0086, lpg0171, lpg1907, lpg2885	4	0	0	30	9		2.41806	1.07956	1.40591	14.8436	20.3845	12.8313
[truncated: 167 more rows]

## Sheet: File 1f
File 1f: Subset data for all critical gene combinations identified in U937 macrophage infection experiments
[truncated: 170 more rows]

[truncated: 4 more sheets: File 1g, File 1h, File 1i, File 1j]
